# Supplementary material for: Links between Soil Bacteriobiomes and Fungistasis toward Fungi Infecting the Colorado Potato Beetle
Source: Microorganisms. 2023 Apr 4;11(4):943. doi: 10.3390/microorganisms11040943 (PMC10141481; doi:10.3390/microorganisms11040943)
Supplement: Supplementary file 1 [file microorganisms-11-00943-s001.zip › File S1 (Dataset).xls]

## Sheet: Taxa
OTU	domain	phylum	class	order	family	genus	OTUs
OTU_14	Bacteria	Acidobacteria	Acidobacteria_Gp16	Gp16	Gp16	Gp16	OTU_14 (unc_Gp16)
OTU_10	Bacteria	Actinobacteria	Actinobacteria	unc_Actinobacteria	unc_Actinobacteria	unc_Actinobacteria	OTU_10 (unc_Actinobacteria)
OTU_7	Bacteria	Actinobacteria	Actinobacteria	Micrococcales	Micrococcaceae	Pseudarthrobacter	OTU_7 (unc_Pseudarthrobacter)
OTU_80	Bacteria	Acidobacteria	Acidobacteria_Gp16	Gp16	Gp16	Gp16	OTU_80 (unc_Gp16)
OTU_70	Bacteria	Acidobacteria	Acidobacteria_Gp16	Gp16	Gp16	Gp16	OTU_70 (unc_Gp16)
OTU_33	Bacteria	Acidobacteria	Acidobacteria_Gp16	Gp16	Gp16	Gp16	OTU_33 (unc_Gp16)
OTU_71	Bacteria	Acidobacteria	Acidobacteria_Gp6	Gp6	Gp6	Gp6	OTU_71 (unc_Gp6)
OTU_61	Bacteria	Acidobacteria	Acidobacteria_Gp16	Gp16	Gp16	Gp16	OTU_61 (unc_Gp16)
OTU_49	Bacteria	Gemmatimonadetes	unc_Gemmatimonadetes	unc_Gemmatimonadetes	unc_Gemmatimonadetes	unc_Gemmatimonadetes	OTU_49 (unc_Gemmatimonadetes)
OTU_51	Bacteria	Actinobacteria	Actinobacteria	Geodermatophilales	Geodermatophilaceae	Blastococcus	OTU_51 (unc_Blastococcus)
OTU_53	Bacteria	Acidobacteria	Acidobacteria_Gp4	Gp4	Gp4	Gp4	OTU_53 (unc_Gp4)
OTU_57	Bacteria	Actinobacteria	Actinobacteria	unc_Actinobacteria	unc_Actinobacteria	unc_Actinobacteria	OTU_57 (unc_Actinobacteria)
OTU_11	Bacteria	Proteobacteria	Alphaproteobacteria	Rhizobiales	Bradyrhizobiaceae	Bradyrhizobium	OTU_11 (unc_Bradyrhizobium)
OTU_48	Bacteria	Proteobacteria	Alphaproteobacteria	Sphingomonadales	Sphingomonadaceae	Sphingomonas	OTU_48 (unc_Sphingomonas)
OTU_64	Bacteria	Actinobacteria	Actinobacteria	Streptomycetales	Streptomycetaceae	Streptomyces	OTU_64 (unc_Streptomyces)
OTU_22	Bacteria	Actinobacteria	Actinobacteria	Propionibacteriales	Propionibacteriaceae	Microlunatus	OTU_22 (unc_Microlunatus)
OTU_32	Bacteria	Actinobacteria	Thermoleophilia	Gaiellales	Gaiellaceae	Gaiella	OTU_32 (unc_Gaiella)
OTU_25	Bacteria	Actinobacteria	Actinobacteria	unc_Actinobacteria	unc_Actinobacteria	unc_Actinobacteria	OTU_25 (unc_Actinobacteria)
OTU_127	Bacteria	Acidobacteria	Acidobacteria_Gp16	Gp16	Gp16	Gp16	OTU_127 (unc_Gp16)
OTU_78	Bacteria	Actinobacteria	Actinobacteria	Streptosporangiales	Streptosporangiaceae	Nonomuraea	OTU_78 (unc_Nonomuraea)
OTU_52	Bacteria	Firmicutes	Bacilli	Bacillales	Bacillaceae1	Bacillus	OTU_52 (unc_Bacillus)
OTU_72	Bacteria	Acidobacteria	Acidobacteria_Gp6	Gp6	Gp6	Gp6	OTU_72 (unc_Gp6)
OTU_34	Bacteria	Proteobacteria	Alphaproteobacteria	Rhizobiales	unc_Rhizobiales	unc_Rhizobiales	OTU_34 (unc_Rhizobiales)
OTU_109	Bacteria	Acidobacteria	Acidobacteria_Gp6	Gp6	Gp6	Gp6	OTU_109 (unc_Gp6)
OTU_36	Bacteria	Acidobacteria	Acidobacteria_Gp10	Gp10	Gp10	Gp10	OTU_36 (unc_Gp10)
OTU_167	Bacteria	Actinobacteria	Thermoleophilia	Solirubrobacterales	Solirubrobacteraceae	Solirubrobacter	OTU_167 (unc_Solirubrobacter)
OTU_30	Bacteria	Actinobacteria	unc_Actinobacteria	unc_Actinobacteria	unc_Actinobacteria	unc_Actinobacteria	OTU_30 (unc_Actinobacteria)
OTU_128	Bacteria	Acidobacteria	Acidobacteria_Gp6	Gp6	Gp6	Gp6	OTU_128 (unc_Gp6)
OTU_113	Bacteria	unc_Bacteria	unc_Bacteria	unc_Bacteria	unc_Bacteria	unc_Bacteria	OTU_113 (unc_Bacteria)
OTU_90	Bacteria	Actinobacteria	Thermoleophilia	Solirubrobacterales	unc_Solirubrobacterales	unc_Solirubrobacterales	OTU_90 (unc_Solirubrobacterales)
OTU_55	Bacteria	Acidobacteria	Acidobacteria	unc_Acidobacteria	unc_Acidobacteria	unc_Acidobacteria	OTU_55 (unc_Acidobacteria)
OTU_47	Bacteria	Actinobacteria	Rubrobacteria	Rubrobacterales	Rubrobacteraceae	Rubrobacter	OTU_47 (unc_Rubrobacter)
OTU_195	Bacteria	Actinobacteria	Actinobacteria	Streptomycetales	Streptomycetaceae	Streptomyces	OTU_195 (unc_Streptomyces)
OTU_40	Bacteria	Actinobacteria	Thermoleophilia	Gaiellales	Gaiellaceae	Gaiella	OTU_40 (Gaiella_occulta)
OTU_155	Bacteria	Actinobacteria	Thermoleophilia	Gaiellales	Gaiellaceae	Gaiella	OTU_155 (unc_Gaiella)
OTU_38	Bacteria	Firmicutes	Bacilli	Bacillales	Bacillaceae1	Peribacillus	OTU_38 (unc_Peribacillus)
OTU_59	Bacteria	Acidobacteria	Acidobacteria_Gp6	Gp6	Gp6	Gp6	OTU_59 (unc_Gp6)
OTU_237	Bacteria	Acidobacteria	Acidobacteria_Gp6	Gp6	Gp6	Gp6	OTU_237 (unc_Gp6)
OTU_8060	Bacteria	unc_Bacteria	unc_Bacteria	unc_Bacteria	unc_Bacteria	unc_Bacteria	OTU_8060 (unc_Bacteria)
OTU_7827	Bacteria	Acidobacteria	Acidobacteria_Gp16	Gp16	Gp16	Gp16	OTU_7827 (unc_Gp16)
OTU_149	Bacteria	unc_Bacteria	unc_Bacteria	unc_Bacteria	unc_Bacteria	unc_Bacteria	OTU_149 (unc_Bacteria)
OTU_213	Bacteria	Acidobacteria	Acidobacteria_Gp6	Gp6	Gp6	Gp6	OTU_213 (unc_Gp6)
OTU_102	Bacteria	Acidobacteria	Acidobacteria_Gp6	Gp6	Gp6	Gp6	OTU_102 (unc_Gp6)
OTU_170	Bacteria	Acidobacteria	Acidobacteria_Gp6	Gp6	Gp6	Gp6	OTU_170 (unc_Gp6)
OTU_1766	Bacteria	Firmicutes	Bacilli	Bacillales	Bacillaceae1	Bacillus	OTU_1766 (unc_Bacillus)
OTU_39	Bacteria	Actinobacteria	Actinobacteria	Streptosporangiales	Streptosporangiaceae	Streptosporangium	OTU_39 (unc_Streptosporangium)
OTU_271	Bacteria	Actinobacteria	Actinobacteria	Micromonosporales	Micromonosporaceae	Actinoplanes	OTU_271 (unc_Actinoplanes)
OTU_145	Bacteria	Acidobacteria	Acidobacteria_Gp6	Gp6	Gp6	Gp6	OTU_145 (unc_Gp6)
OTU_118	Bacteria	Actinobacteria	Actinobacteria	Micrococcales	Intrasporangiaceae	unc_Intrasporangiaceae	OTU_118 (unc_Intrasporangiaceae)
OTU_44	Bacteria	Firmicutes	Bacilli	Bacillales	Bacillaceae1	Neobacillus	OTU_44 (unc_Neobacillus)
OTU_88	Bacteria	Actinobacteria	Thermoleophilia	Gaiellales	Gaiellaceae	Gaiella	OTU_88 (Gaiella_occulta)
OTU_5172	Bacteria	Proteobacteria	Alphaproteobacteria	Rhizobiales	unc_Rhizobiales	unc_Rhizobiales	OTU_5172 (unc_Rhizobiales)
OTU_150	Bacteria	Actinobacteria	Thermoleophilia	unc_Thermoleophilia	unc_Thermoleophilia	unc_Thermoleophilia	OTU_150 (unc_Thermoleophilia)
OTU_589	Bacteria	Acidobacteria	Acidobacteria_Gp16	Gp16	Gp16	Gp16	OTU_589 (unc_Gp16)
OTU_67	Bacteria	Actinobacteria	Actinobacteria	Pseudonocardiales	Pseudonocardiaceae	Pseudonocardia	OTU_67 (unc_Pseudonocardia)
OTU_110	Bacteria	Acidobacteria	Acidobacteria_Gp6	Gp6	Gp6	Gp6	OTU_110 (unc_Gp6)
OTU_295	Bacteria	Acidobacteria	Acidobacteria_Gp4	Gp4	Gp4	Gp4	OTU_295 (unc_Gp4)
OTU_125	Bacteria	Firmicutes	Bacilli	Bacillales	Planococcaceae	Sporosarcina	OTU_125 (unc_Sporosarcina)
OTU_24	Bacteria	Actinobacteria	Thermoleophilia	Solirubrobacterales	unc_Solirubrobacterales	unc_Solirubrobacterales	OTU_24 (unc_Solirubrobacterales)
OTU_41	Bacteria	Actinobacteria	Actinobacteria	unc_Actinobacteria	unc_Actinobacteria	unc_Actinobacteria	OTU_41 (unc_Actinobacteria)
OTU_233	Bacteria	Actinobacteria	Thermoleophilia	Solirubrobacterales	unc_Solirubrobacterales	unc_Solirubrobacterales	OTU_233 (unc_Solirubrobacterales)
OTU_69	Bacteria	Proteobacteria	Alphaproteobacteria	Rhizobiales	Methylobacteriaceae	Microvirga	OTU_69 (unc_Microvirga)
OTU_200	Bacteria	Acidobacteria	Acidobacteria_Gp6	Gp6	Gp6	Gp6	OTU_200 (unc_Gp6)
OTU_3565	Bacteria	Actinobacteria	Rubrobacteria	Rubrobacterales	Rubrobacteraceae	Rubrobacter	OTU_3565 (unc_Rubrobacter)
OTU_550	Bacteria	Acidobacteria	Acidobacteria_Gp6	Gp6	Gp6	Gp6	OTU_550 (unc_Gp6)
OTU_103	Bacteria	Acidobacteria	Acidobacteria_Gp4	Gp4	Gp4	Gp4	OTU_103 (unc_Gp4)
OTU_89	Bacteria	Acidobacteria	Acidobacteria_Gp1	Gp1	Gp1	Gp1	OTU_89 (unc_Gp1)
OTU_54	Bacteria	Actinobacteria	Actinobacteria	unc_Actinobacteria	unc_Actinobacteria	unc_Actinobacteria	OTU_54 (unc_Actinobacteria)
OTU_104	Bacteria	Acidobacteria	Acidobacteria_Gp4	Gp4	Gp4	Gp4	OTU_104 (unc_Gp4)
OTU_86	Bacteria	Proteobacteria	Gammaproteobacteria	Nevskiales	Steroidobacteraceae	Povalibacter	OTU_86 (Povalibacter_uvarum)
OTU_992	Bacteria	Actinobacteria	Thermoleophilia	Solirubrobacterales	unc_Solirubrobacterales	unc_Solirubrobacterales	OTU_992 (unc_Solirubrobacterales)
OTU_236	Bacteria	Actinobacteria	Thermoleophilia	Gaiellales	Gaiellaceae	Gaiella	OTU_236 (unc_Gaiella)
OTU_1027	Bacteria	Actinobacteria	Thermoleophilia	Gaiellales	Gaiellaceae	Gaiella	OTU_1027 (Gaiella_occulta)
OTU_111	Bacteria	Proteobacteria	Alphaproteobacteria	Rhizobiales	unc_Rhizobiales	unc_Rhizobiales	OTU_111 (unc_Rhizobiales)
OTU_83	Bacteria	Actinobacteria	Thermoleophilia	Gaiellales	Gaiellaceae	Gaiella	OTU_83 (unc_Gaiella)
OTU_66	Bacteria	unc_Bacteria	unc_Bacteria	unc_Bacteria	unc_Bacteria	unc_Bacteria	OTU_66 (unc_Bacteria)
OTU_159	Bacteria	Proteobacteria	Alphaproteobacteria	Rhodospirillales	Azospirillaceae	Skermanella	OTU_159 (unc_Skermanella)
OTU_114	Bacteria	Actinobacteria	Actinobacteria	Propionibacteriales	Nocardioidaceae	Marmoricola	OTU_114 (unc_Marmoricola)
OTU_169	Bacteria	Acidobacteria	Acidobacteria_Gp1	Gp1	Gp1	Gp1	OTU_169 (unc_Gp1)
OTU_100	Bacteria	Actinobacteria	Actinobacteria	Mycobacteriales	Mycobacteriaceae	Mycobacterium	OTU_100 (unc_Mycobacterium)
OTU_376	Bacteria	unc_Bacteria	unc_Bacteria	unc_Bacteria	unc_Bacteria	unc_Bacteria	OTU_376 (unc_Bacteria)
OTU_4412	Bacteria	Acidobacteria	Acidobacteria_Gp16	Gp16	Gp16	Gp16	OTU_4412 (unc_Gp16)
OTU_108	Bacteria	Actinobacteria	Thermoleophilia	Gaiellales	Gaiellaceae	Gaiella	OTU_108 (unc_Gaiella)
OTU_119	Bacteria	Actinobacteria	Thermoleophilia	Gaiellales	Gaiellaceae	Gaiella	OTU_119 (unc_Gaiella)
OTU_247	Bacteria	Acidobacteria	Acidobacteria_Gp6	Gp6	Gp6	Gp6	OTU_247 (unc_Gp6)
OTU_27	Bacteria	Proteobacteria	Alphaproteobacteria	Rhizobiales	unc_Rhizobiales	unc_Rhizobiales	OTU_27 (unc_Rhizobiales)
OTU_37	Bacteria	Actinobacteria	Thermoleophilia	Gaiellales	Gaiellaceae	Gaiella	OTU_37 (unc_Gaiella)
OTU_164	Bacteria	Acidobacteria	Acidobacteria_Gp6	Gp6	Gp6	Gp6	OTU_164 (unc_Gp6)
OTU_106	Bacteria	unc_Bacteria	unc_Bacteria	unc_Bacteria	unc_Bacteria	unc_Bacteria	OTU_106 (unc_Bacteria)
OTU_285	Bacteria	Acidobacteria	Acidobacteria_Gp6	Gp6	Gp6	Gp6	OTU_285 (unc_Gp6)
OTU_81	Bacteria	Actinobacteria	Actinobacteria	Pseudonocardiales	Pseudonocardiaceae	Pseudonocardia	OTU_81 (unc_Pseudonocardia)
OTU_96	Bacteria	Gemmatimonadetes	Gemmatimonadetes	Gemmatimonadales	Gemmatimonadaceae	unc_Gemmatimonadaceae	OTU_96 (unc_Gemmatimonadaceae)
OTU_132	Bacteria	Actinobacteria	Actinobacteria	Propionibacteriales	Kribbellaceae	Kribbella	OTU_132 (unc_Kribbella)
OTU_561	Bacteria	Acidobacteria	Acidobacteria	unc_Acidobacteria	unc_Acidobacteria	unc_Acidobacteria	OTU_561 (unc_Acidobacteria)
OTU_73	Bacteria	Actinobacteria	Rubrobacteria	Rubrobacterales	Rubrobacteraceae	Rubrobacter	OTU_73 (Rubrobacter_spartanus)
OTU_98	Bacteria	Actinobacteria	Thermoleophilia	Solirubrobacterales	unc_Solirubrobacterales	unc_Solirubrobacterales	OTU_98 (unc_Solirubrobacterales)
OTU_147	Bacteria	Actinobacteria	Actinobacteria	Micromonosporales	Micromonosporaceae	unc_Micromonosporaceae	OTU_147 (unc_Micromonosporaceae)
OTU_62	Bacteria	Firmicutes	Clostridia	Clostridiales	Peptostreptococcaceae	Romboutsia	OTU_62 (Romboutsia_timonensis)
OTU_77	Bacteria	Acidobacteria	Acidobacteria_Gp1	Gp1	Gp1	Gp1	OTU_77 (unc_Gp1)
OTU_126	Bacteria	Actinobacteria	Actinobacteria	Micromonosporales	Micromonosporaceae	Micromonospora	OTU_126 (unc_Micromonospora)
OTU_207	Bacteria	Acidobacteria	Acidobacteria_Gp6	Gp6	Gp6	Gp6	OTU_207 (unc_Gp6)
OTU_79	Bacteria	Actinobacteria	Thermoleophilia	unc_Thermoleophilia	unc_Thermoleophilia	unc_Thermoleophilia	OTU_79 (unc_Thermoleophilia)
OTU_122	Bacteria	Actinobacteria	Actinobacteria	Propionibacteriales	Nocardioidaceae	Nocardioides	OTU_122 (unc_Nocardioides)
OTU_136	Bacteria	unc_Bacteria	unc_Bacteria	unc_Bacteria	unc_Bacteria	unc_Bacteria	OTU_136 (unc_Bacteria)
OTU_1044	Bacteria	Acidobacteria	Acidobacteria_Gp6	Gp6	Gp6	Gp6	OTU_1044 (unc_Gp6)
OTU_218	Bacteria	unc_Bacteria	unc_Bacteria	unc_Bacteria	unc_Bacteria	unc_Bacteria	OTU_218 (unc_Bacteria)
OTU_441	Bacteria	Acidobacteria	Acidobacteria_Gp6	Gp6	Gp6	Gp6	OTU_441 (unc_Gp6)
OTU_8409	Bacteria	Actinobacteria	Thermoleophilia	Gaiellales	Gaiellaceae	Gaiella	OTU_8409 (unc_Gaiella)
OTU_208	Bacteria	Proteobacteria	Betaproteobacteria	unc_Betaproteobacteria	unc_Betaproteobacteria	unc_Betaproteobacteria	OTU_208 (unc_Betaproteobacteria)
OTU_453	Bacteria	Acidobacteria	Acidobacteria_Gp6	Gp6	Gp6	Gp6	OTU_453 (unc_Gp6)
OTU_264	Bacteria	Acidobacteria	Acidobacteria_Gp6	Gp6	Gp6	Gp6	OTU_264 (unc_Gp6)
OTU_177	Bacteria	Actinobacteria	Thermoleophilia	Gaiellales	Gaiellaceae	Gaiella	OTU_177 (unc_Gaiella)
OTU_431	Bacteria	Chloroflexi	Anaerolineae	Anaerolineales	Anaerolineaceae	Thermanaerothrix	OTU_431 (unc_Thermanaerothrix)
OTU_436	Bacteria	Actinobacteria	Thermoleophilia	Solirubrobacterales	unc_Solirubrobacterales	unc_Solirubrobacterales	OTU_436 (unc_Solirubrobacterales)
OTU_142	Bacteria	Acidobacteria	Acidobacteria_Gp3	Gp3	Gp3	Gp3	OTU_142 (unc_Gp3)
OTU_193	Bacteria	Chloroflexi	Anaerolineae	Anaerolineales	Anaerolineaceae	unc_Anaerolineaceae	OTU_193 (unc_Anaerolineaceae)
OTU_600	Bacteria	Acidobacteria	Acidobacteria_Gp6	Gp6	Gp6	Gp6	OTU_600 (unc_Gp6)
OTU_513	Bacteria	unc_Bacteria	unc_Bacteria	unc_Bacteria	unc_Bacteria	unc_Bacteria	OTU_513 (unc_Bacteria)
OTU_3896	Bacteria	Acidobacteria	unc_Acidobacteria	unc_Acidobacteria	unc_Acidobacteria	unc_Acidobacteria	OTU_3896 (unc_Acidobacteria)
OTU_322	Bacteria	Proteobacteria	Betaproteobacteria	unc_Betaproteobacteria	unc_Betaproteobacteria	unc_Betaproteobacteria	OTU_322 (unc_Betaproteobacteria)
OTU_381	Bacteria	Actinobacteria	Actinobacteria	Propionibacteriales	Nocardioidaceae	Nocardioides	OTU_381 (unc_Nocardioides)
OTU_8081	Bacteria	Actinobacteria	Acidimicrobiia	Acidimicrobiales	Ilumatobacteraceae	unc_Ilumatobacteraceae	OTU_8081 (unc_Ilumatobacteraceae)
OTU_590	Bacteria	unc_Bacteria	unc_Bacteria	unc_Bacteria	unc_Bacteria	unc_Bacteria	OTU_590 (unc_Bacteria)
OTU_9276	Bacteria	Actinobacteria	Actinobacteria	Streptomycetales	Streptomycetaceae	Streptomyces	OTU_9276 (unc_Streptomyces)
OTU_323	Bacteria	Actinobacteria	unc_Actinobacteria	unc_Actinobacteria	unc_Actinobacteria	unc_Actinobacteria	OTU_323 (unc_Actinobacteria)
OTU_172	Bacteria	Acidobacteria	Acidobacteria	unc_Acidobacteria	unc_Acidobacteria	unc_Acidobacteria	OTU_172 (unc_Acidobacteria)
OTU_388	Bacteria	Actinobacteria	Actinobacteria	Micromonosporales	Micromonosporaceae	Asanoa	OTU_388 (unc_Asanoa)
OTU_263	Bacteria	Proteobacteria	Alphaproteobacteria	Rhodospirillales	unc_Rhodospirillales	unc_Rhodospirillales	OTU_263 (unc_Rhodospirillales)
OTU_280	Bacteria	Acidobacteria	Acidobacteria_Gp6	Gp6	Gp6	Gp6	OTU_280 (unc_Gp6)
OTU_7645	Bacteria	Acidobacteria	Acidobacteria_Gp6	Gp6	Gp6	Gp6	OTU_7645 (unc_Gp6)
OTU_309	Bacteria	Proteobacteria	Alphaproteobacteria	Rhodospirillales	unc_Rhodospirillales	unc_Rhodospirillales	OTU_309 (unc_Rhodospirillales)
OTU_933	Bacteria	Acidobacteria	Acidobacteria	unc_Acidobacteria	unc_Acidobacteria	Gp16	OTU_933 (uncultured_Acidobacteria)
OTU_369	Bacteria	Chloroflexi	unc_Chloroflexi	unc_Chloroflexi	unc_Chloroflexi	unc_Chloroflexi	OTU_369 (unc_Chloroflexi)
OTU_180	Bacteria	Proteobacteria	Alphaproteobacteria	Rhodospirillales	Reyranellaceae	Reyranella	OTU_180 (unc_Reyranella)
OTU_921	Bacteria	Proteobacteria	Betaproteobacteria	unc_Betaproteobacteria	unc_Betaproteobacteria	unc_Betaproteobacteria	OTU_921 (unc_Betaproteobacteria)
OTU_558	Bacteria	Actinobacteria	Thermoleophilia	Solirubrobacterales	Solirubrobacteraceae	Solirubrobacter	OTU_558 (unc_Solirubrobacter)
OTU_112	Bacteria	Actinobacteria	Thermoleophilia	Gaiellales	Gaiellaceae	Gaiella	OTU_112 (unc_Gaiella)
OTU_307	Bacteria	Proteobacteria	Alphaproteobacteria	Rhizobiales	Bradyrhizobiaceae	unc_Bradyrhizobiaceae	OTU_307 (unc_Bradyrhizobiaceae)
OTU_131	Bacteria	Firmicutes	Clostridia	Clostridiales	Peptostreptococcaceae	unc_Peptostreptococcaceae	OTU_131 (unc_Peptostreptococcaceae)
OTU_273	Bacteria	Actinobacteria	Actinobacteria	unc_Actinobacteria	unc_Actinobacteria	unc_Actinobacteria	OTU_273 (unc_Actinobacteria)
OTU_129	Bacteria	Firmicutes	Erysipelotrichia	Erysipelotrichales	Erysipelotrichaceae	Turicibacter	OTU_129 (Turicibacter_sanguinis)
OTU_293	Bacteria	Proteobacteria	Gammaproteobacteria	Gammaproteobacteria_incertae	unc_Gammaproteobacteria_incertae	Acidibacter	OTU_293 (Acidibacter_ferrireducens)
OTU_353	Bacteria	Firmicutes	Bacilli	Bacillales	Planococcaceae	Sporosarcina	OTU_353 (unc_Sporosarcina)
OTU_4229	Bacteria	Acidobacteria	Acidobacteria_Gp6	Gp6	Gp6	Gp6	OTU_4229 (unc_Gp6)
OTU_256	Bacteria	Proteobacteria	Deltaproteobacteria	Myxococcales	Cystobacteraceae	unc_Cystobacteraceae	OTU_256 (unc_Cystobacteraceae)
OTU_211	Bacteria	Acidobacteria	Acidobacteria_Gp3	Gp3	Gp3	Gp3	OTU_211 (unc_Gp3)
OTU_84	Bacteria	Acidobacteria	Acidobacteria_Gp6	Gp6	Gp6	Gp6	OTU_84 (unc_Gp6)
OTU_355	Bacteria	Proteobacteria	Gammaproteobacteria	unc_Gammaproteobacteria	unc_Gammaproteobacteria	unc_Gammaproteobacteria	OTU_355 (unc_Gammaproteobacteria)
OTU_120	Bacteria	Acidobacteria	Acidobacteria_Gp6	Gp6	Gp6	Gp6	OTU_120 (unc_Gp6)
OTU_50	Bacteria	Verrucomicrobia	Spartobacteria	Spartobacteria_genera_incertae_sedis	Spartobacteria_genera_incertae_sedis	Spartobacteria_genera_incertae_sedis	OTU_50 (unc_Spartobacteria_genera_incertae_sedis)
OTU_440	Bacteria	Acidobacteria	Acidobacteria_Gp6	Gp6	Gp6	Gp6	OTU_440 (unc_Gp6)
OTU_454	Bacteria	Proteobacteria	Deltaproteobacteria	Myxococcales	Kofleriaceae	Kofleria	OTU_454 (unc_Kofleria)
OTU_257	Bacteria	Acidobacteria	Acidobacteria_Gp16	Gp16	Gp16	Gp16	OTU_257 (unc_Gp16)
OTU_181	Bacteria	Actinobacteria	Acidimicrobiia	Acidimicrobiales	unc_Acidimicrobiales	unc_Acidimicrobiales	OTU_181 (unc_Acidimicrobiales)
OTU_1509	Bacteria	Proteobacteria	Betaproteobacteria	Burkholderiales	Oxalobacteraceae	Massilia	OTU_1509 (unc_Massilia)
OTU_879	Bacteria	Proteobacteria	Alphaproteobacteria	Rhizobiales	Bradyrhizobiaceae	unc_Bradyrhizobiaceae	OTU_879 (unc_Bradyrhizobiaceae)
OTU_123	Bacteria	Gemmatimonadetes	Gemmatimonadetes	Gemmatimonadales	Gemmatimonadaceae	unc_Gemmatimonadaceae	OTU_123 (unc_Gemmatimonadaceae)
OTU_601	Bacteria	Acidobacteria	Acidobacteria_Gp6	Gp6	Gp6	Gp6	OTU_601 (unc_Gp6)
OTU_87	Bacteria	Actinobacteria	Acidimicrobiia	Acidimicrobiales	unc_Acidimicrobiales	unc_Acidimicrobiales	OTU_87 (unc_Acidimicrobiales)
OTU_413	Bacteria	Acidobacteria	Acidobacteria_Gp17	Gp17	Gp17	Gp17	OTU_413 (unc_Gp17)
OTU_466	Bacteria	Actinobacteria	Actinobacteria	unc_Actinobacteria	unc_Actinobacteria	unc_Actinobacteria	OTU_466 (unc_Actinobacteria)
OTU_163	Bacteria	Chloroflexi	unc_Chloroflexi	unc_Chloroflexi	unc_Chloroflexi	unc_Chloroflexi	OTU_163 (unc_Chloroflexi)
OTU_244	Bacteria	Actinobacteria	Thermoleophilia	Solirubrobacterales	unc_Solirubrobacterales	unc_Solirubrobacterales	OTU_244 (unc_Solirubrobacterales)
OTU_460	Bacteria	Actinobacteria	unc_Actinobacteria	unc_Actinobacteria	unc_Actinobacteria	unc_Actinobacteria	OTU_460 (unc_Actinobacteria)
OTU_2894	Bacteria	Actinobacteria	Actinobacteria	Propionibacteriales	Nocardioidaceae	Aeromicrobium	OTU_2894 (unc_Aeromicrobium)
OTU_198	Bacteria	unc_Bacteria	unc_Bacteria	unc_Bacteria	unc_Bacteria	unc_Bacteria	OTU_198 (unc_Bacteria)
OTU_378	Bacteria	Firmicutes	Bacilli	Bacillales	Planococcaceae	Psychrobacillus	OTU_378 (unc_Psychrobacillus)
OTU_891	Bacteria	Actinobacteria	Thermoleophilia	Gaiellales	Gaiellaceae	Gaiella	OTU_891 (unc_Gaiella)
OTU_151	Bacteria	Actinobacteria	unc_Actinobacteria	unc_Actinobacteria	unc_Actinobacteria	unc_Actinobacteria	OTU_151 (unc_Actinobacteria)
OTU_1133	Bacteria	Actinobacteria	Thermoleophilia	Solirubrobacterales	unc_Solirubrobacterales	unc_Solirubrobacterales	OTU_1133 (unc_Solirubrobacterales)
OTU_219	Bacteria	Actinobacteria	Actinobacteria	Streptosporangiales	Thermomonosporaceae	Actinomadura	OTU_219 (unc_Actinomadura)
OTU_423	Bacteria	Acidobacteria	Acidobacteria_Gp16	Gp16	Gp16	Gp16	OTU_423 (unc_Gp16)
OTU_6139	Bacteria	Actinobacteria	Actinobacteria	Micromonosporales	Micromonosporaceae	unc_Micromonosporaceae	OTU_6139 (unc_Micromonosporaceae)
OTU_225	Bacteria	Gemmatimonadetes	Gemmatimonadetes	Gemmatimonadales	Gemmatimonadaceae	unc_Gemmatimonadaceae	OTU_225 (unc_Gemmatimonadaceae)
OTU_152	Bacteria	unc_Bacteria	unc_Bacteria	unc_Bacteria	unc_Bacteria	unc_Bacteria	OTU_152 (unc_Bacteria)
OTU_359	Bacteria	Actinobacteria	Actinobacteria	Propionibacteriales	Nocardioidaceae	unc_Nocardioidaceae	OTU_359 (unc_Nocardioidaceae)
OTU_56	Bacteria	Proteobacteria	Alphaproteobacteria	Rhizobiales	Hyphomicrobiaceae	unc_Hyphomicrobiaceae	OTU_56 (unc_Hyphomicrobiaceae)
OTU_787	Bacteria	Proteobacteria	Alphaproteobacteria	Rhizobiales	Phyllobacteriaceae	Mesorhizobium	OTU_787 (unc_Mesorhizobium)
OTU_329	Bacteria	Proteobacteria	Alphaproteobacteria	Rhizobiales	unc_Rhizobiales	unc_Rhizobiales	OTU_329 (unc_Rhizobiales)
OTU_1621	Bacteria	Actinobacteria	Actinobacteria	Streptomycetales	Streptomycetaceae	Streptomyces	OTU_1621 (unc_Streptomyces)
OTU_868	Bacteria	unc_Bacteria	unc_Bacteria	unc_Bacteria	unc_Bacteria	unc_Bacteria	OTU_868 (unc_Bacteria)
OTU_760	Bacteria	unc_Bacteria	unc_Bacteria	unc_Bacteria	unc_Bacteria	unc_Bacteria	OTU_760 (unc_Bacteria)
OTU_58	Bacteria	Proteobacteria	Alphaproteobacteria	Sphingomonadales	Sphingomonadaceae	Sphingomonas	OTU_58 (unc_Sphingomonas)
OTU_308	Bacteria	Acidobacteria	Acidobacteria	unc_Acidobacteria	unc_Acidobacteria	Gp6	OTU_308 (unc_Gp6)
OTU_232	Bacteria	Actinobacteria	Actinobacteria	Propionibacteriales	Nocardioidaceae	Nocardioides	OTU_232 (Nocardioides_islandensis)
OTU_829	Bacteria	Acidobacteria	Acidobacteria_Gp1	Gp1	Gp1	Gp1	OTU_829 (unc_Gp1)
OTU_468	Bacteria	Actinobacteria	Thermoleophilia	unc_Thermoleophilia	unc_Thermoleophilia	unc_Thermoleophilia	OTU_468 (unc_Thermoleophilia)
OTU_97	Bacteria	Chloroflexi	unc_Chloroflexi	unc_Chloroflexi	unc_Chloroflexi	unc_Chloroflexi	OTU_97 (unc_Chloroflexi)
OTU_463	Bacteria	Proteobacteria	Alphaproteobacteria	Rhodospirillales	Acetobacteraceae	unc_Acetobacteraceae	OTU_463 (unc_Acetobacteraceae)
OTU_9669	Bacteria	Acidobacteria	Acidobacteria_Gp16	Gp16	Gp16	Gp16	OTU_9669 (unc_Gp16)
OTU_8827	Bacteria	Actinobacteria	Actinobacteria	Pseudonocardiales	Pseudonocardiaceae	Lentzea	OTU_8827 (unc_Lentzea)
OTU_139	Bacteria	Actinobacteria	Acidimicrobiia	Acidimicrobiales	Iamiaceae	unc_Iamiaceae	OTU_139 (unc_Iamiaceae)
OTU_121	Bacteria	Proteobacteria	Alphaproteobacteria	Rhizobiales	unc_Rhizobiales	unc_Rhizobiales	OTU_121 (unc_Rhizobiales)
OTU_274	Bacteria	Actinobacteria	Actinobacteria	Streptosporangiales	Streptosporangiaceae	Microbispora	OTU_274 (unc_Microbispora)
OTU_74	Bacteria	Nitrospirae	Nitrospira	Nitrospirales	Nitrospiraceae	Nitrospira	OTU_74 (Nitrospira_japonica)
OTU_401	Bacteria	Acidobacteria	Acidobacteria_Gp6	Gp6	Gp6	Gp6	OTU_401 (unc_Gp6)
OTU_63	Bacteria	Firmicutes	Clostridia	Clostridiales	Clostridiaceae1	Clostridiumsensustricto	OTU_63 (unc_Clostridiumsensustricto)
OTU_368	Bacteria	Proteobacteria	Alphaproteobacteria	Rhizobiales	Devosiaceae	Devosia	OTU_368 (unc_Devosia)
OTU_489	Bacteria	Acidobacteria	Acidobacteria_Gp6	Gp6	Gp6	Gp6	OTU_489 (unc_Gp6)
OTU_321	Bacteria	Acidobacteria	Acidobacteria_Gp6	Gp6	Gp6	Gp6	OTU_321 (unc_Gp6)
OTU_91	Bacteria	Actinobacteria	Acidimicrobiia	Acidimicrobiales	Ilumatobacteraceae	unc_Ilumatobacteraceae	OTU_91 (unc_Ilumatobacteraceae)
OTU_133	Bacteria	Proteobacteria	Alphaproteobacteria	Rhodospirillales	unc_Rhodospirillales	unc_Rhodospirillales	OTU_133 (unc_Rhodospirillales)
OTU_530	Bacteria	Firmicutes	Bacilli	Bacillales	Paenibacillaceae1	Paenibacillus	OTU_530 (unc_Paenibacillus)
OTU_303	Bacteria	Proteobacteria	Betaproteobacteria	unc_Betaproteobacteria	unc_Betaproteobacteria	unc_Betaproteobacteria	OTU_303 (unc_Betaproteobacteria)
OTU_319	Bacteria	Chloroflexi	Caldilineae	Caldilineales	Caldilineaceae	Litorilinea	OTU_319 (unc_Litorilinea)
OTU_203	Bacteria	Firmicutes	Bacilli	Bacillales	Alicyclobacillaceae	Tumebacillus	OTU_203 (unc_Tumebacillus)
OTU_235	Bacteria	Acidobacteria	Acidobacteria_Gp6	Gp6	Gp6	Gp6	OTU_235 (unc_Gp6)
OTU_242	Bacteria	unc_Bacteria	unc_Bacteria	unc_Bacteria	unc_Bacteria	unc_Bacteria	OTU_242 (unc_Bacteria)
OTU_629	Bacteria	Acidobacteria	Acidobacteria_Gp6	Gp6	Gp6	Gp6	OTU_629 (unc_Gp6)
OTU_174	Bacteria	Proteobacteria	Alphaproteobacteria	Rhizobiales	Hyphomicrobiaceae	unc_Hyphomicrobiaceae	OTU_174 (unc_Hyphomicrobiaceae)
OTU_349	Bacteria	Nitrospirae	Nitrospira	Nitrospirales	Nitrospiraceae	Nitrospira	OTU_349 (unc_Nitrospira)
OTU_640	Bacteria	Acidobacteria	Acidobacteria_Gp6	Gp6	Gp6	Gp6	OTU_640 (unc_Gp6)
OTU_422	Bacteria	Acidobacteria	Blastocatellia	Blastocatellales	Blastocatellaceae	Stenotrophobacter	OTU_422 (unc_Stenotrophobacter)
OTU_765	Bacteria	Proteobacteria	Deltaproteobacteria	Myxococcales	Labilitrichaceae	Labilithrix	OTU_765 (unc_Labilithrix)
OTU_162	Bacteria	Acidobacteria	Blastocatellia	Blastocatellales	Blastocatellaceae	Stenotrophobacter	OTU_162 (Stenotrophobacter_terrae)
OTU_628	Bacteria	Actinobacteria	Thermoleophilia	Gaiellales	Gaiellaceae	Gaiella	OTU_628 (unc_Gaiella)
OTU_5470	Bacteria	Actinobacteria	Thermoleophilia	Gaiellales	Gaiellaceae	Gaiella	OTU_5470 (unc_Gaiella)
OTU_261	Bacteria	Acidobacteria	Acidobacteria_Gp6	Gp6	Gp6	Gp6	OTU_261 (unc_Gp6)
OTU_607	Bacteria	Acidobacteria	Acidobacteria_Gp6	Gp6	Gp6	Gp6	OTU_607 (unc_Gp6)
OTU_161	Bacteria	Proteobacteria	Alphaproteobacteria	Rhizobiales	Hyphomicrobiaceae	unc_Hyphomicrobiaceae	OTU_161 (unc_Hyphomicrobiaceae)
OTU_171	Bacteria	Acidobacteria	Acidobacteria	unc_Acidobacteria	unc_Acidobacteria	unc_Acidobacteria	OTU_171 (unc_Acidobacteria)
OTU_1399	Bacteria	Acidobacteria	Acidobacteria_Gp6	Gp6	Gp6	Gp6	OTU_1399 (unc_Gp6)
OTU_741	Bacteria	Proteobacteria	Gammaproteobacteria	Gammaproteobacteria_incertae	unc_Gammaproteobacteria_incertae	Acidibacter	OTU_741 (Acidibacter_ferrireducens)
OTU_310	Bacteria	Acidobacteria	Acidobacteria_Gp16	Gp16	Gp16	Gp16	OTU_310 (unc_Gp16)
OTU_246	Bacteria	Acidobacteria	Acidobacteria_Gp6	Gp6	Gp6	Gp6	OTU_246 (unc_Gp6)
OTU_495	Bacteria	Actinobacteria	Thermoleophilia	Solirubrobacterales	unc_Solirubrobacterales	unc_Solirubrobacterales	OTU_495 (unc_Solirubrobacterales)
OTU_993	Bacteria	Proteobacteria	Alphaproteobacteria	Rhizobiales	Hyphomicrobiaceae	unc_Hyphomicrobiaceae	OTU_993 (unc_Hyphomicrobiaceae)
OTU_222	Bacteria	Actinobacteria	Actinobacteria	Mycobacteriales	Mycobacteriaceae	Mycobacterium	OTU_222 (unc_Mycobacterium)
OTU_602	Bacteria	Gemmatimonadetes	Gemmatimonadetes	Gemmatimonadales	Gemmatimonadaceae	unc_Gemmatimonadaceae	OTU_602 (unc_Gemmatimonadaceae)
OTU_248	Bacteria	Proteobacteria	Alphaproteobacteria	Rhizobiales	unc_Rhizobiales	unc_Rhizobiales	OTU_248 (unc_Rhizobiales)
OTU_8070	Bacteria	Actinobacteria	Actinobacteria	unc_Actinobacteria	unc_Actinobacteria	unc_Actinobacteria	OTU_8070 (unc_Actinobacteria)
OTU_140	Bacteria	Actinobacteria	Actinobacteria	unc_Actinobacteria	unc_Actinobacteria	unc_Actinobacteria	OTU_140 (unc_Actinobacteria)
OTU_953	Bacteria	unc_Bacteria	unc_Bacteria	unc_Bacteria	unc_Bacteria	unc_Bacteria	OTU_953 (unc_Bacteria)
OTU_124	Bacteria	Proteobacteria	Alphaproteobacteria	Rhizobiales	Hyphomicrobiaceae	Pedomicrobium	OTU_124 (unc_Pedomicrobium)
OTU_1002	Bacteria	Acidobacteria	Acidobacteria_Gp6	Gp6	Gp6	Gp6	OTU_1002 (unc_Gp6)
OTU_2926	Bacteria	Acidobacteria	Acidobacteria_Gp6	Gp6	Gp6	Gp6	OTU_2926 (unc_Gp6)
OTU_410	Bacteria	Acidobacteria	Acidobacteria_Gp16	Gp16	Gp16	Gp16	OTU_410 (unc_Gp16)
OTU_270	Bacteria	unc_Bacteria	unc_Bacteria	unc_Bacteria	unc_Bacteria	unc_Bacteria	OTU_270 (unc_Bacteria)
OTU_1008	Bacteria	Actinobacteria	Thermoleophilia	Solirubrobacterales	unc_Solirubrobacterales	unc_Solirubrobacterales	OTU_1008 (unc_Solirubrobacterales)
OTU_277	Bacteria	unc_Bacteria	unc_Bacteria	unc_Bacteria	unc_Bacteria	unc_Bacteria	OTU_277 (unc_Bacteria)
OTU_444	Bacteria	Gemmatimonadetes	Gemmatimonadetes	Gemmatimonadales	Gemmatimonadaceae	unc_Gemmatimonadaceae	OTU_444 (unc_Gemmatimonadaceae)
OTU_883	Bacteria	Proteobacteria	Alphaproteobacteria	Sphingomonadales	Sphingomonadaceae	Sphingomonas	OTU_883 (unc_Sphingomonas)
OTU_384	Bacteria	Acidobacteria	Acidobacteria_Gp6	Gp6	Gp6	Gp6	OTU_384 (unc_Gp6)
OTU_165	Bacteria	Actinobacteria	Actinobacteria	unc_Actinobacteria	unc_Actinobacteria	unc_Actinobacteria	OTU_165 (unc_Actinobacteria)
OTU_446	Bacteria	Acidobacteria	Acidobacteria_Gp1	Gp1	Gp1	Gp1	OTU_446 (unc_Gp1)
OTU_360	Bacteria	Acidobacteria	Acidobacteria_Gp6	Gp6	Gp6	Gp6	OTU_360 (unc_Gp6)
OTU_1765	Bacteria	Actinobacteria	Thermoleophilia	Solirubrobacterales	unc_Solirubrobacterales	unc_Solirubrobacterales	OTU_1765 (unc_Solirubrobacterales)
OTU_518	Bacteria	Acidobacteria	Acidobacteria_Gp3	Gp3	Gp3	Gp3	OTU_518 (unc_Gp3)
OTU_391	Bacteria	Acidobacteria	Acidobacteria_Gp6	Gp6	Gp6	Gp6	OTU_391 (unc_Gp6)
OTU_188	Bacteria	Actinobacteria	Acidimicrobiia	Acidimicrobiales	Ilumatobacteraceae	Desertimonas	OTU_188 (unc_Desertimonas)
OTU_189	Bacteria	Acidobacteria	Acidobacteria_Gp25	Gp25	Gp25	Gp25	OTU_189 (unc_Gp25)
OTU_733	Bacteria	Firmicutes	Bacilli	Bacillales	Paenibacillaceae1	Paenibacillus	OTU_733 (Paenibacillus_endophyticus)
OTU_339	Bacteria	Chloroflexi	unc_Chloroflexi	unc_Chloroflexi	unc_Chloroflexi	unc_Chloroflexi	OTU_339 (unc_Chloroflexi)
OTU_7952	Bacteria	Firmicutes	Bacilli	Bacillales	Planococcaceae	Sporosarcina	OTU_7952 (unc_Sporosarcina)
OTU_1321	Bacteria	Acidobacteria	Acidobacteria_Gp6	Gp6	Gp6	Gp6	OTU_1321 (unc_Gp6)
OTU_224	Bacteria	Proteobacteria	Alphaproteobacteria	Rhizobiales	Methylobacteriaceae	Microvirga	OTU_224 (unc_Microvirga)
OTU_93	Bacteria	Actinobacteria	unc_Actinobacteria	unc_Actinobacteria	unc_Actinobacteria	unc_Actinobacteria	OTU_93 (unc_Actinobacteria)
OTU_1155	Bacteria	Chloroflexi	Thermomicrobia	Sphaerobacterales	Sphaerobacteraceae	unc_Sphaerobacteraceae	OTU_1155 (unc_Sphaerobacteraceae)
OTU_194	Bacteria	Actinobacteria	Actinobacteria	Streptosporangiales	Thermomonosporaceae	Actinoallomurus	OTU_194 (Actinoallomurus_bryophytorum)
OTU_228	Bacteria	Actinobacteria	Actinobacteria	Jiangellales	Jiangellaceae	unc_Jiangellaceae	OTU_228 (unc_Jiangellaceae)
OTU_1015	Bacteria	Acidobacteria	Vicinamibacteria	Vicinamibacterales	Vicinamibacteraceae	Luteitalea	OTU_1015 (Luteitalea_pratensis)
OTU_475	Bacteria	Acidobacteria	Acidobacteria_Gp6	Gp6	Gp6	Gp6	OTU_475 (unc_Gp6)
OTU_160	Bacteria	Actinobacteria	Actinobacteria	Geodermatophilales	Geodermatophilaceae	Geodermatophilus	OTU_160 (unc_Geodermatophilus)
OTU_1418	Bacteria	Acidobacteria	Acidobacteria	unc_Acidobacteria	unc_Acidobacteria	Gp6	OTU_1418 (unc_Gp6)
OTU_920	Bacteria	Proteobacteria	Betaproteobacteria	Burkholderiales	Comamonadaceae	unc_Comamonadaceae	OTU_920 (unc_Comamonadaceae)
OTU_457	Bacteria	Acidobacteria	Acidobacteria_Gp17	Gp17	Gp17	Gp17	OTU_457 (unc_Gp17)
OTU_1486	Bacteria	Acidobacteria	Acidobacteria_Gp3	Gp3	Gp3	Gp3	OTU_1486 (unc_Gp3)
OTU_346	Bacteria	Acidobacteria	Acidobacteria_Gp11	Gp11	Gp11	Gp11	OTU_346 (unc_Gp11)
OTU_3813	Bacteria	Acidobacteria	Acidobacteria_Gp6	Gp6	Gp6	Gp6	OTU_3813 (unc_Gp6)
OTU_1088	Bacteria	Proteobacteria	Betaproteobacteria	Burkholderiales	Oxalobacteraceae	unc_Oxalobacteraceae	OTU_1088 (unc_Oxalobacteraceae)
OTU_6687	Bacteria	Actinobacteria	Actinobacteria	unc_Actinobacteria	unc_Actinobacteria	unc_Actinobacteria	OTU_6687 (unc_Actinobacteria)
OTU_202	Bacteria	unc_Bacteria	unc_Bacteria	unc_Bacteria	unc_Bacteria	unc_Bacteria	OTU_202 (unc_Bacteria)
OTU_624	Bacteria	Acidobacteria	Acidobacteria_Gp5	Gp5	Gp5	Gp5	OTU_624 (unc_Gp5)
OTU_2280	Bacteria	Acidobacteria	Acidobacteria_Gp6	Gp6	Gp6	Gp6	OTU_2280 (unc_Gp6)
OTU_302	Bacteria	Gemmatimonadetes	Gemmatimonadetes	Gemmatimonadales	Gemmatimonadaceae	Gemmatimonas	OTU_302 (unc_Gemmatimonas)
OTU_2783	Bacteria	Acidobacteria	Acidobacteria_Gp6	Gp6	Gp6	Gp6	OTU_2783 (unc_Gp6)
OTU_268	Bacteria	Proteobacteria	Alphaproteobacteria	Rhizobiales	Hyphomicrobiaceae	Hyphomicrobium	OTU_268 (unc_Hyphomicrobium)
OTU_197	Bacteria	Proteobacteria	Alphaproteobacteria	Rhizobiales	Phyllobacteriaceae	Phyllobacterium	OTU_197 (unc_Phyllobacterium)
OTU_75	Bacteria	Acidobacteria	Acidobacteria_Gp16	Gp16	Gp16	Gp16	OTU_75 (unc_Gp16)
OTU_137	Bacteria	unc_Bacteria	unc_Bacteria	unc_Bacteria	unc_Bacteria	unc_Bacteria	OTU_137 (unc_Bacteria)
OTU_3587	Bacteria	Actinobacteria	Thermoleophilia	Solirubrobacterales	unc_Solirubrobacterales	unc_Solirubrobacterales	OTU_3587 (unc_Solirubrobacterales)
OTU_539	Bacteria	Proteobacteria	Alphaproteobacteria	Rhodospirillales	Rhodospirillaceae	unc_Rhodospirillaceae	OTU_539 (unc_Rhodospirillaceae)
OTU_7841	Bacteria	Acidobacteria	Acidobacteria_Gp6	Gp6	Gp6	Gp6	OTU_7841 (unc_Gp6)
OTU_305	Bacteria	Verrucomicrobia	Spartobacteria	Spartobacteria_genera_incertae_sedis	Spartobacteria_genera_incertae_sedis	Spartobacteria_genera_incertae_sedis	OTU_305 (unc_Spartobacteria_genera_incertae_sedis)
OTU_217	Bacteria	Actinobacteria	Actinobacteria	Propionibacteriales	Nocardioidaceae	Nocardioides	OTU_217 (unc_Nocardioides)
OTU_823	Bacteria	Firmicutes	Bacilli	Bacillales	Thermoactinomycetaceae1	Shimazuella	OTU_823 (Shimazuella_kribbensis)
OTU_1403	Bacteria	Firmicutes	Bacilli	Bacillales	Planococcaceae	Lysinibacillus	OTU_1403 (unc_Lysinibacillus)
OTU_492	Bacteria	Proteobacteria	Gammaproteobacteria	unc_Gammaproteobacteria	unc_Gammaproteobacteria	unc_Gammaproteobacteria	OTU_492 (unc_Gammaproteobacteria)
OTU_398	Bacteria	Actinobacteria	Acidimicrobiia	Acidimicrobiales	unc_Acidimicrobiales	unc_Acidimicrobiales	OTU_398 (unc_Acidimicrobiales)
OTU_4317	Bacteria	Acidobacteria	Acidobacteria_Gp17	Gp17	Gp17	Gp17	OTU_4317 (unc_Gp17)
OTU_366	Bacteria	Acidobacteria	Acidobacteria_Gp1	Gp1	Gp1	Gp1	OTU_366 (unc_Gp1)
OTU_545	Bacteria	Acidobacteria	Acidobacteria_Gp1	Occallatibacter	Occallatibacter	Occallatibacter	OTU_545 (unc_Occallatibacter)
OTU_4223	Bacteria	Acidobacteria	unc_Acidobacteria	unc_Acidobacteria	unc_Acidobacteria	unc_Acidobacteria	OTU_4223 (unc_Acidobacteria)
OTU_221	Bacteria	Actinobacteria	unc_Actinobacteria	unc_Actinobacteria	unc_Actinobacteria	unc_Actinobacteria	OTU_221 (unc_Actinobacteria)
OTU_971	Bacteria	Acidobacteria	Acidobacteria	unc_Acidobacteria	unc_Acidobacteria	unc_Acidobacteria	OTU_971 (unc_Acidobacteria)
OTU_2773	Bacteria	Proteobacteria	Alphaproteobacteria	Rhizobiales	unc_Rhizobiales	unc_Rhizobiales	OTU_2773 (unc_Rhizobiales)
OTU_201	Bacteria	Actinobacteria	Actinobacteria	Micromonosporales	Micromonosporaceae	unc_Micromonosporaceae	OTU_201 (unc_Micromonosporaceae)
OTU_531	Bacteria	Acidobacteria	Acidobacteria_Gp7	Gp7	Gp7	Gp7	OTU_531 (unc_Gp7)
OTU_4266	Bacteria	Actinobacteria	Actinobacteria	Micromonosporales	Micromonosporaceae	Actinoplanes	OTU_4266 (unc_Actinoplanes)
OTU_382	Bacteria	Actinobacteria	Thermoleophilia	Gaiellales	Gaiellaceae	Gaiella	OTU_382 (Gaiella_occulta)
OTU_8121	Bacteria	Proteobacteria	Gammaproteobacteria	Enterobacterales	Enterobacteriaceae	unc_Enterobacteriaceae	OTU_8121 (unc_Enterobacteriaceae)
OTU_8075	Bacteria	Actinobacteria	Thermoleophilia	Gaiellales	Gaiellaceae	Gaiella	OTU_8075 (unc_Gaiella)
OTU_479	Bacteria	Actinobacteria	unc_Actinobacteria	unc_Actinobacteria	unc_Actinobacteria	unc_Actinobacteria	OTU_479 (unc_Actinobacteria)
OTU_408	Bacteria	Acidobacteria	Blastocatellia	Blastocatellales	Blastocatellaceae	Stenotrophobacter	OTU_408 (unc_Stenotrophobacter)
OTU_347	Bacteria	Firmicutes	Bacilli	Bacillales	Thermoactinomycetaceae1	Thermoactinomyces	OTU_347 (Thermoactinomyces_vulgaris)
OTU_351	Bacteria	Proteobacteria	Betaproteobacteria	unc_Betaproteobacteria	unc_Betaproteobacteria	unc_Betaproteobacteria	OTU_351 (unc_Betaproteobacteria)
OTU_154	Bacteria	Acidobacteria	Acidobacteria_Gp7	Gp7	Gp7	Gp7	OTU_154 (unc_Gp7)
OTU_345	Bacteria	Firmicutes	Bacilli	Bacillales	Paenibacillaceae1	Paenibacillus	OTU_345 (unc_Paenibacillus)
OTU_1301	Bacteria	unc_Bacteria	unc_Bacteria	unc_Bacteria	unc_Bacteria	unc_Bacteria	OTU_1301 (unc_Bacteria)
OTU_185	Bacteria	Acidobacteria	Acidobacteria_Gp17	Gp17	Gp17	Gp17	OTU_185 (unc_Gp17)
OTU_1054	Bacteria	Acidobacteria	Acidobacteria_Gp6	Gp6	Gp6	Gp6	OTU_1054 (unc_Gp6)
OTU_354	Bacteria	Firmicutes	Bacilli	Bacillales	Paenibacillaceae1	Paenibacillus	OTU_354 (unc_Paenibacillus)
OTU_643	Bacteria	Acidobacteria	Acidobacteria_Gp4	Gp4	Gp4	Gp4	OTU_643 (unc_Gp4)
OTU_649	Bacteria	Acidobacteria	Acidobacteria	unc_Acidobacteria	unc_Acidobacteria	unc_Acidobacteria	OTU_649 (unc_Acidobacteria)
OTU_429	Bacteria	Proteobacteria	Alphaproteobacteria	unc_Alphaproteobacteria	unc_Alphaproteobacteria	unc_Alphaproteobacteria	OTU_429 (unc_Alphaproteobacteria)
OTU_210	Bacteria	Actinobacteria	Actinobacteria	Streptomycetales	Streptomycetaceae	unc_Streptomycetaceae	OTU_210 (unc_Streptomycetaceae)
OTU_420	Bacteria	Firmicutes	Bacilli	Bacillales	Paenibacillaceae1	Paenibacillus	OTU_420 (unc_Paenibacillus)
OTU_216	Bacteria	unc_Bacteria	unc_Bacteria	unc_Bacteria	unc_Bacteria	unc_Bacteria	OTU_216 (unc_Bacteria)
OTU_313	Bacteria	Acidobacteria	Acidobacteria_Gp6	Gp6	Gp6	Gp6	OTU_313 (unc_Gp6)
OTU_156	Bacteria	Gemmatimonadetes	Gemmatimonadetes	Gemmatimonadales	Gemmatimonadaceae	unc_Gemmatimonadaceae	OTU_156 (unc_Gemmatimonadaceae)
OTU_804	Bacteria	Acidobacteria	Acidobacteria_Gp6	Gp6	Gp6	Gp6	OTU_804 (unc_Gp6)
OTU_4667	Bacteria	Acidobacteria	Acidobacteria_Gp6	Gp6	Gp6	Gp6	OTU_4667 (unc_Gp6)
OTU_1016	Bacteria	Actinobacteria	Acidimicrobiia	Acidimicrobiales	Ilumatobacteraceae	Desertimonas	OTU_1016 (unc_Desertimonas)
OTU_251	Bacteria	Chloroflexi	unc_Chloroflexi	unc_Chloroflexi	unc_Chloroflexi	unc_Chloroflexi	OTU_251 (unc_Chloroflexi)
OTU_400	Bacteria	Acidobacteria	Acidobacteria_Gp16	Gp16	Gp16	Gp16	OTU_400 (unc_Gp16)
OTU_176	Bacteria	unc_Bacteria	unc_Bacteria	unc_Bacteria	unc_Bacteria	unc_Bacteria	OTU_176 (unc_Bacteria)
OTU_474	Bacteria	unc_Bacteria	unc_Bacteria	unc_Bacteria	unc_Bacteria	unc_Bacteria	OTU_474 (unc_Bacteria)
OTU_8497	Bacteria	Actinobacteria	Thermoleophilia	Gaiellales	Gaiellaceae	Gaiella	OTU_8497 (unc_Gaiella)
OTU_212	Bacteria	Acidobacteria	Acidobacteria_Gp1	Gp1	Gp1	Gp1	OTU_212 (unc_Gp1)
OTU_2744	Bacteria	unc_Bacteria	unc_Bacteria	unc_Bacteria	unc_Bacteria	unc_Bacteria	OTU_2744 (unc_Bacteria)
OTU_1036	Bacteria	Acidobacteria	Acidobacteria_Gp25	Gp25	Gp25	Gp25	OTU_1036 (unc_Gp25)
OTU_592	Bacteria	Acidobacteria	Acidobacteria_Gp16	Gp16	Gp16	Gp16	OTU_592 (unc_Gp16)
OTU_375	Bacteria	Proteobacteria	Gammaproteobacteria	Nevskiales	Steroidobacteraceae	unc_Steroidobacteraceae	OTU_375 (unc_Steroidobacteraceae)
OTU_1123	Bacteria	unc_Bacteria	unc_Bacteria	unc_Bacteria	unc_Bacteria	unc_Bacteria	OTU_1123 (unc_Bacteria)
OTU_7096	Bacteria	Proteobacteria	Alphaproteobacteria	Sphingomonadales	Sphingomonadaceae	unc_Sphingomonadaceae	OTU_7096 (unc_Sphingomonadaceae)
OTU_674	Bacteria	unc_Bacteria	unc_Bacteria	unc_Bacteria	unc_Bacteria	unc_Bacteria	OTU_674 (unc_Bacteria)
OTU_3198	Bacteria	Acidobacteria	Acidobacteria_Gp6	Gp6	Gp6	Gp6	OTU_3198 (unc_Gp6)
OTU_300	Bacteria	Proteobacteria	Alphaproteobacteria	Rhodospirillales	Geminicoccaceae	unc_Geminicoccaceae	OTU_300 (unc_Geminicoccaceae)
OTU_311	Bacteria	Actinobacteria	Actinobacteria	Propionibacteriales	Nocardioidaceae	unc_Nocardioidaceae	OTU_311 (unc_Nocardioidaceae)
OTU_594	Bacteria	Chloroflexi	Anaerolineae	Anaerolineales	Anaerolineaceae	unc_Anaerolineaceae	OTU_594 (unc_Anaerolineaceae)
OTU_2782	Bacteria	Actinobacteria	Acidimicrobiia	Acidimicrobiales	Ilumatobacteraceae	Ilumatobacter	OTU_2782 (unc_Ilumatobacter)
OTU_9522	Bacteria	Actinobacteria	Actinobacteria	Mycobacteriales	Mycobacteriaceae	Mycobacterium	OTU_9522 (unc_Mycobacterium)
OTU_341	Bacteria	Chloroflexi	Anaerolineae	unc_Anaerolineae	unc_Anaerolineae	unc_Anaerolineae	OTU_341 (unc_Anaerolineae)
OTU_7522	Bacteria	unc_Bacteria	unc_Bacteria	unc_Bacteria	unc_Bacteria	unc_Bacteria	OTU_7522 (unc_Bacteria)
OTU_3539	Bacteria	Chloroflexi	Anaerolineae	unc_Anaerolineae	unc_Anaerolineae	unc_Anaerolineae	OTU_3539 (unc_Anaerolineae)
OTU_650	Bacteria	Acidobacteria	Acidobacteria_Gp6	Gp6	Gp6	Gp6	OTU_650 (unc_Gp6)
OTU_687	Bacteria	Proteobacteria	Alphaproteobacteria	Rhizobiales	Hyphomicrobiaceae	unc_Hyphomicrobiaceae	OTU_687 (unc_Hyphomicrobiaceae)
OTU_973	Bacteria	Actinobacteria	unc_Actinobacteria	unc_Actinobacteria	unc_Actinobacteria	unc_Actinobacteria	OTU_973 (unc_Actinobacteria)
OTU_435	Bacteria	Actinobacteria	Actinobacteria	Micrococcales	Micrococcaceae	unc_Micrococcaceae	OTU_435 (unc_Micrococcaceae)
OTU_930	Bacteria	Proteobacteria	Betaproteobacteria	unc_Betaproteobacteria	unc_Betaproteobacteria	unc_Betaproteobacteria	OTU_930 (unc_Betaproteobacteria)
OTU_243	Bacteria	unc_Bacteria	unc_Bacteria	unc_Bacteria	unc_Bacteria	unc_Bacteria	OTU_243 (unc_Bacteria)
OTU_344	Bacteria	Actinobacteria	Actinobacteria	unc_Actinobacteria	unc_Actinobacteria	unc_Actinobacteria	OTU_344 (unc_Actinobacteria)
OTU_470	Bacteria	Actinobacteria	Thermoleophilia	Solirubrobacterales	unc_Solirubrobacterales	unc_Solirubrobacterales	OTU_470 (unc_Solirubrobacterales)
OTU_298	Bacteria	unc_Bacteria	unc_Bacteria	unc_Bacteria	unc_Bacteria	unc_Bacteria	OTU_298 (unc_Bacteria)
OTU_1894	Bacteria	Actinobacteria	Actinobacteria	Micromonosporales	Micromonosporaceae	unc_Micromonosporaceae	OTU_1894 (unc_Micromonosporaceae)
OTU_117	Bacteria	Firmicutes	Bacilli	Bacillales	Bacillaceae1	Bacillus	OTU_117 (unc_Bacillus)
OTU_10054	Bacteria	unc_Bacteria	unc_Bacteria	unc_Bacteria	unc_Bacteria	unc_Bacteria	OTU_10054 (unc_Bacteria)
OTU_499	Bacteria	Proteobacteria	Gammaproteobacteria	Gammaproteobacteria_incertae_sedis	Acidibacter	Acidibacter	OTU_499 (unc_Acidibacter)
OTU_538	Bacteria	Nitrospirae	Nitrospira	Nitrospirales	Nitrospiraceae	Nitrospira	OTU_538 (unc_Nitrospira)
OTU_955	Bacteria	Acidobacteria	Acidobacteria_Gp6	Gp6	Gp6	Gp6	OTU_955 (unc_Gp6)
OTU_1390	Bacteria	Latescibacteria	Latescibacteria_genera_incertae_sedis	Latescibacteria_genera_incertae_sedis	Latescibacteria_genera_incertae_sedis	Latescibacteria_genera_incertae_sedis	OTU_1390 (unc_Latescibacteria_genera_incertae_sedis)
OTU_6260	Bacteria	Chloroflexi	unc_Chloroflexi	unc_Chloroflexi	unc_Chloroflexi	unc_Chloroflexi	OTU_6260 (unc_Chloroflexi)
OTU_467	Bacteria	Actinobacteria	Actinobacteria	Micromonosporales	Micromonosporaceae	unc_Micromonosporaceae	OTU_467 (unc_Micromonosporaceae)
OTU_583	Bacteria	Acidobacteria	Acidobacteria_Gp4	Gp4	Gp4	Gp4	OTU_583 (unc_Gp4)
OTU_2018	Bacteria	Proteobacteria	Alphaproteobacteria	Rhizobiales	Phyllobacteriaceae	Aminobacter	OTU_2018 (unc_Aminobacter)
OTU_239	Bacteria	Proteobacteria	Alphaproteobacteria	Rhodospirillales	unc_Rhodospirillales	unc_Rhodospirillales	OTU_239 (unc_Rhodospirillales)
OTU_445	Bacteria	Firmicutes	Bacilli	Bacillales	Alicyclobacillaceae	Tumebacillus	OTU_445 (unc_Tumebacillus)
OTU_9339	Bacteria	Proteobacteria	Alphaproteobacteria	Sphingomonadales	Sphingomonadaceae	unc_Sphingomonadaceae	OTU_9339 (unc_Sphingomonadaceae)
OTU_1455	Bacteria	unc_Bacteria	unc_Bacteria	unc_Bacteria	unc_Bacteria	unc_Bacteria	OTU_1455 (unc_Bacteria)
OTU_191	Bacteria	Actinobacteria	Actinobacteria	Pseudonocardiales	Pseudonocardiaceae	Pseudonocardia	OTU_191 (unc_Pseudonocardia)
OTU_704	Bacteria	Acidobacteria	Blastocatellia	Blastocatellales	Blastocatellaceae	Stenotrophobacter	OTU_704 (unc_Stenotrophobacter)
OTU_269	Bacteria	unc_Bacteria	unc_Bacteria	unc_Bacteria	unc_Bacteria	unc_Bacteria	OTU_269 (unc_Bacteria)
OTU_961	Bacteria	Actinobacteria	Actinobacteria	Micromonosporales	Micromonosporaceae	Virgisporangium	OTU_961 (unc_Virgisporangium)
OTU_426	Bacteria	Chloroflexi	Thermomicrobia	Sphaerobacterales	Sphaerobacteraceae	unc_Sphaerobacteraceae	OTU_426 (unc_Sphaerobacteraceae)
OTU_689	Bacteria	Chloroflexi	Anaerolineae	unc_Anaerolineae	unc_Anaerolineae	unc_Anaerolineae	OTU_689 (unc_Anaerolineae)
OTU_199	Bacteria	Actinobacteria	Acidimicrobiia	Acidimicrobiales	Iamiaceae	unc_Iamiaceae	OTU_199 (unc_Iamiaceae)
OTU_957	Bacteria	Proteobacteria	Alphaproteobacteria	unc_Alphaproteobacteria	unc_Alphaproteobacteria	unc_Alphaproteobacteria	OTU_957 (unc_Alphaproteobacteria)
OTU_847	Bacteria	Actinobacteria	Acidimicrobiia	Acidimicrobiales	Iamiaceae	unc_Iamiaceae	OTU_847 (unc_Iamiaceae)
OTU_1308	Bacteria	Acidobacteria	Acidobacteria_Gp4	Gp4	Gp4	Gp4	OTU_1308 (unc_Gp4)
OTU_768	Bacteria	Gemmatimonadetes	Gemmatimonadetes	Gemmatimonadales	Gemmatimonadaceae	unc_Gemmatimonadaceae	OTU_768 (unc_Gemmatimonadaceae)
OTU_459	Bacteria	Acidobacteria	Acidobacteria_Gp6	Gp6	Gp6	Gp6	OTU_459 (unc_Gp6)
OTU_289	Bacteria	Chloroflexi	Thermomicrobia	Sphaerobacterales	Sphaerobacteraceae	unc_Sphaerobacteraceae	OTU_289 (unc_Sphaerobacteraceae)
OTU_912	Bacteria	Actinobacteria	unc_Actinobacteria	unc_Actinobacteria	unc_Actinobacteria	unc_Actinobacteria	OTU_912 (unc_Actinobacteria)
OTU_209	Bacteria	Actinobacteria	Actinobacteria	unc_Actinobacteria	unc_Actinobacteria	unc_Actinobacteria	OTU_209 (unc_Actinobacteria)
OTU_7313	Bacteria	Actinobacteria	Actinobacteria	Geodermatophilales	Geodermatophilaceae	Geodermatophilus	OTU_7313 (unc_Geodermatophilus)
OTU_1832	Bacteria	Gemmatimonadetes	Gemmatimonadetes	Gemmatimonadales	Gemmatimonadaceae	unc_Gemmatimonadaceae	OTU_1832 (unc_Gemmatimonadaceae)
OTU_798	Bacteria	unc_Bacteria	unc_Bacteria	unc_Bacteria	unc_Bacteria	unc_Bacteria	OTU_798 (unc_Bacteria)
OTU_2314	Bacteria	Actinobacteria	Actinobacteria	Geodermatophilales	Geodermatophilaceae	unc_Geodermatophilaceae	OTU_2314 (unc_Geodermatophilaceae)
OTU_9513	Bacteria	Actinobacteria	Actinobacteria	Micromonosporales	Micromonosporaceae	Pilimelia	OTU_9513 (unc_Pilimelia)
OTU_515	Bacteria	Acidobacteria	Acidobacteria	unc_Acidobacteria	unc_Acidobacteria	unc_Acidobacteria	OTU_515 (unc_Acidobacteria)
OTU_484	Bacteria	Acidobacteria	Acidobacteria_Gp6	Gp6	Gp6	Gp6	OTU_484 (unc_Gp6)
OTU_1408	Bacteria	Acidobacteria	Acidobacteria_Gp6	Gp6	Gp6	Gp6	OTU_1408 (unc_Gp6)
OTU_407	Bacteria	Actinobacteria	Thermoleophilia	Gaiellales	Gaiellaceae	Gaiella	OTU_407 (unc_Gaiella)
OTU_1431	Bacteria	Firmicutes	Bacilli	Bacillales	Paenibacillaceae1	Cohnella	OTU_1431 (unc_Cohnella)
OTU_551	Bacteria	Firmicutes	Bacilli	Bacillales	Alicyclobacillaceae	Tumebacillus	OTU_551 (Tumebacillus_ginsengisoli)
OTU_747	Bacteria	unc_Bacteria	unc_Bacteria	unc_Bacteria	unc_Bacteria	unc_Bacteria	OTU_747 (unc_Bacteria)
OTU_483	Bacteria	Acidobacteria	Acidobacteria_Gp17	Gp17	Gp17	Gp17	OTU_483 (unc_Gp17)
OTU_645	Bacteria	unc_Bacteria	unc_Bacteria	unc_Bacteria	unc_Bacteria	unc_Bacteria	OTU_645 (unc_Bacteria)
OTU_1701	Bacteria	Firmicutes	Bacilli	Bacillales	Bacillaceae1	unc_Bacillaceae1	OTU_1701 (unc_Bacillaceae1)
OTU_9732	Bacteria	Actinobacteria	Actinobacteria	Pseudonocardiales	Pseudonocardiaceae	Pseudonocardia	OTU_9732 (unc_Pseudonocardia)
OTU_6498	Bacteria	Acidobacteria	Acidobacteria_Gp6	Gp6	Gp6	Gp6	OTU_6498 (unc_Gp6)
OTU_282	Bacteria	Actinobacteria	Actinobacteria	unc_Actinobacteria	unc_Actinobacteria	unc_Actinobacteria	OTU_282 (unc_Actinobacteria)
OTU_1731	Bacteria	Actinobacteria	Thermoleophilia	Gaiellales	Gaiellaceae	Gaiella	OTU_1731 (unc_Gaiella)
OTU_8885	Bacteria	Actinobacteria	Actinobacteria	Micromonosporales	Micromonosporaceae	Dactylosporangium	OTU_8885 (unc_Dactylosporangium)
OTU_196	Bacteria	unc_Bacteria	unc_Bacteria	unc_Bacteria	unc_Bacteria	unc_Bacteria	OTU_196 (unc_Bacteria)
OTU_631	Bacteria	Firmicutes	Bacilli	Bacillales	Paenibacillaceae1	Brevibacillus	OTU_631 (unc_Brevibacillus)
OTU_514	Bacteria	Chloroflexi	unc_Chloroflexi	unc_Chloroflexi	unc_Chloroflexi	unc_Chloroflexi	OTU_514 (unc_Chloroflexi)
OTU_549	Bacteria	Actinobacteria	unc_Actinobacteria	unc_Actinobacteria	unc_Actinobacteria	unc_Actinobacteria	OTU_549 (unc_Actinobacteria)
OTU_1281	Bacteria	Acidobacteria	Acidobacteria_Gp17	Gp17	Gp17	Gp17	OTU_1281 (unc_Gp17)
OTU_144	Bacteria	Verrucomicrobia	Spartobacteria	Spartobacteria_genera_incertae_sedis	Spartobacteria_genera_incertae_sedis	Spartobacteria_genera_incertae_sedis	OTU_144 (unc_Spartobacteria_genera_incertae_sedis)
OTU_250	Bacteria	Actinobacteria	unc_Actinobacteria	unc_Actinobacteria	unc_Actinobacteria	unc_Actinobacteria	OTU_250 (unc_Actinobacteria)
OTU_1124	Bacteria	Proteobacteria	Betaproteobacteria	unc_Betaproteobacteria	unc_Betaproteobacteria	unc_Betaproteobacteria	OTU_1124 (unc_Betaproteobacteria)
OTU_82	Bacteria	Actinobacteria	Acidimicrobiia	Acidimicrobiales	Ilumatobacteraceae	unc_Ilumatobacteraceae	OTU_82 (unc_Ilumatobacteraceae)
OTU_1461	Bacteria	Gemmatimonadetes	Gemmatimonadetes	Gemmatimonadales	Gemmatimonadaceae	unc_Gemmatimonadaceae	OTU_1461 (unc_Gemmatimonadaceae)
OTU_596	Bacteria	Firmicutes	Clostridia	Clostridiales	Heliobacteriaceae	Hydrogenispora	OTU_596 (unc_Hydrogenispora)
OTU_566	Bacteria	Proteobacteria	Alphaproteobacteria	Rhodospirillales	Geminicoccaceae	Arboricoccus	OTU_566 (unc_Arboricoccus)
OTU_836	Bacteria	Actinobacteria	Thermoleophilia	Solirubrobacterales	Parviterribacteraceae	Parviterribacter	OTU_836 (unc_Parviterribacter)
OTU_3420	Bacteria	Firmicutes	Bacilli	Bacillales	Bacillaceae1	Bacillus	OTU_3420 (unc_Bacillus)
OTU_706	Bacteria	Acidobacteria	Acidobacteria_Gp6	Gp6	Gp6	Gp6	OTU_706 (unc_Gp6)
OTU_3657	Bacteria	unc_Bacteria	unc_Bacteria	unc_Bacteria	unc_Bacteria	unc_Bacteria	OTU_3657 (unc_Bacteria)
OTU_9036	Bacteria	Proteobacteria	Betaproteobacteria	unc_Betaproteobacteria	unc_Betaproteobacteria	unc_Betaproteobacteria	OTU_9036 (unc_Betaproteobacteria)
OTU_753	Bacteria	Proteobacteria	Alphaproteobacteria	Caulobacterales	Caulobacteraceae	Phenylobacterium	OTU_753 (unc_Phenylobacterium)
OTU_1021	Bacteria	Firmicutes	Bacilli	Bacillales	Alicyclobacillaceae	Tumebacillus	OTU_1021 (unc_Tumebacillus)
OTU_703	Bacteria	Acidobacteria	Acidobacteria_Gp6	Gp6	Gp6	Gp6	OTU_703 (unc_Gp6)
OTU_2408	Bacteria	Acidobacteria	Vicinamibacteria	Vicinamibacterales	Vicinamibacteraceae	Vicinamibacter	OTU_2408 (Vicinamibacter_silvestris)
OTU_516	Bacteria	Acidobacteria	Vicinamibacteria	Vicinamibacterales	Vicinamibacteraceae	Vicinamibacter	OTU_516 (unc_Vicinamibacter)
OTU_412	Bacteria	Chloroflexi	Anaerolineae	Anaerolineales	Anaerolineaceae	unc_Anaerolineaceae	OTU_412 (unc_Anaerolineaceae)
OTU_153	Bacteria	unc_Bacteria	unc_Bacteria	unc_Bacteria	unc_Bacteria	unc_Bacteria	OTU_153 (unc_Bacteria)
OTU_695	Bacteria	Acidobacteria	Acidobacteria_Gp5	Gp5	Gp5	Gp5	OTU_695 (unc_Gp5)
OTU_8933	Bacteria	Acidobacteria	Acidobacteria_Gp6	Gp6	Gp6	Gp6	OTU_8933 (unc_Gp6)
OTU_7123	Bacteria	Acidobacteria	Acidobacteria_Gp16	Gp16	Gp16	Gp16	OTU_7123 (unc_Gp16)
OTU_2901	Bacteria	Acidobacteria	Acidobacteria_Gp6	Gp6	Gp6	Gp6	OTU_2901 (unc_Gp6)
OTU_877	Bacteria	Acidobacteria	Acidobacteria_Gp7	Gp7	Gp7	Gp7	OTU_877 (unc_Gp7)
OTU_9873	Bacteria	Acidobacteria	Acidobacteria_Gp6	Gp6	Gp6	Gp6	OTU_9873 (unc_Gp6)
OTU_465	Bacteria	Acidobacteria	Acidobacteria_Gp6	Gp6	Gp6	Gp6	OTU_465 (unc_Gp6)
OTU_939	Bacteria	Actinobacteria	Thermoleophilia	unc_Thermoleophilia	unc_Thermoleophilia	unc_Thermoleophilia	OTU_939 (unc_Thermoleophilia)
OTU_1245	Bacteria	Actinobacteria	Thermoleophilia	unc_Thermoleophilia	unc_Thermoleophilia	unc_Thermoleophilia	OTU_1245 (unc_Thermoleophilia)
OTU_2185	Bacteria	Actinobacteria	Actinobacteria	Pseudonocardiales	Pseudonocardiaceae	unc_Pseudonocardiaceae	OTU_2185 (unc_Pseudonocardiaceae)
OTU_1583	Bacteria	Acidobacteria	Acidobacteria_Gp6	Gp6	Gp6	Gp6	OTU_1583 (unc_Gp6)
OTU_1207	Bacteria	Firmicutes	Bacilli	Bacillales	Paenibacillaceae1	Cohnella	OTU_1207 (unc_Cohnella)
OTU_336	Bacteria	Acidobacteria	Acidobacteria_Gp6	Gp6	Gp6	Gp6	OTU_336 (unc_Gp6)
OTU_572	Bacteria	Gemmatimonadetes	Gemmatimonadetes	Gemmatimonadales	Gemmatimonadaceae	unc_Gemmatimonadaceae	OTU_572 (unc_Gemmatimonadaceae)
OTU_284	Bacteria	Actinobacteria	Actinobacteria	Streptosporangiales	unc_Streptosporangiales	unc_Streptosporangiales	OTU_284 (unc_Streptosporangiales)
OTU_8976	Bacteria	Chloroflexi	Anaerolineae	Anaerolineales	Anaerolineaceae	unc_Anaerolineaceae	OTU_8976 (unc_Anaerolineaceae)
OTU_1017	Bacteria	unc_Bacteria	unc_Bacteria	unc_Bacteria	unc_Bacteria	unc_Bacteria	OTU_1017 (unc_Bacteria)
OTU_262	Bacteria	Actinobacteria	Actinobacteria	Micromonosporales	Micromonosporaceae	unc_Micromonosporaceae	OTU_262 (unc_Micromonosporaceae)
OTU_652	Bacteria	Proteobacteria	Alphaproteobacteria	Rhodospirillales	unc_Rhodospirillales	unc_Rhodospirillales	OTU_652 (unc_Rhodospirillales)
OTU_1584	Bacteria	Actinobacteria	unc_Actinobacteria	unc_Actinobacteria	unc_Actinobacteria	unc_Actinobacteria	OTU_1584 (unc_Actinobacteria)
OTU_1258	Bacteria	Acidobacteria	Acidobacteria_Gp6	Gp6	Gp6	Gp6	OTU_1258 (unc_Gp6)
OTU_9812	Bacteria	unc_Bacteria	unc_Bacteria	unc_Bacteria	unc_Bacteria	unc_Bacteria	OTU_9812 (unc_Bacteria)
OTU_827	Bacteria	Acidobacteria	Acidobacteria_Gp6	Gp6	Gp6	Gp6	OTU_827 (unc_Gp6)
OTU_418	Bacteria	Actinobacteria	Acidimicrobiia	Acidimicrobiales	Iamiaceae	unc_Iamiaceae	OTU_418 (unc_Iamiaceae)
OTU_1215	Bacteria	Acidobacteria	Acidobacteria_Gp16	Gp16	Gp16	Gp16	OTU_1215 (unc_Gp16)
OTU_1835	Bacteria	Acidobacteria	Acidobacteria_Gp6	Gp6	Gp6	Gp6	OTU_1835 (unc_Gp6)
OTU_374	Bacteria	Verrucomicrobia	Terrimicrobia	Terrimicrobiales	Terrimicrobiaceae	Terrimicrobium	OTU_374 (unc_Terrimicrobium)
OTU_1923	Bacteria	Acidobacteria	Acidobacteria_Gp16	Gp16	Gp16	Gp16	OTU_1923 (unc_Gp16)
OTU_1573	Bacteria	Chloroflexi	Anaerolineae	unc_Anaerolineae	unc_Anaerolineae	unc_Anaerolineae	OTU_1573 (unc_Anaerolineae)
OTU_304	Bacteria	Actinobacteria	Actinobacteria	Micrococcales	unc_Micrococcales	unc_Micrococcales	OTU_304 (unc_Micrococcales)
OTU_306	Bacteria	Firmicutes	Bacilli	Bacillales	Planococcaceae	Solibacillus	OTU_306 (unc_Solibacillus)
OTU_1102	Bacteria	unc_Bacteria	unc_Bacteria	unc_Bacteria	unc_Bacteria	unc_Bacteria	OTU_1102 (unc_Bacteria)
OTU_4388	Bacteria	candidate division WPS-1	WPS-1_genera_incertae_sedis	WPS-1_genera_incertae_sedis	WPS-1_genera_incertae_sedis	WPS-1_genera_incertae_sedis	OTU_4388 (unc_WPS-1_genera_incertae_sedis)
OTU_1499	Bacteria	Acidobacteria	Acidobacteria_Gp6	Gp6	Gp6	Gp6	OTU_1499 (unc_Gp6)
OTU_585	Bacteria	Proteobacteria	Deltaproteobacteria	Myxococcales	Kofleriaceae	Kofleria	OTU_585 (unc_Kofleria)
OTU_721	Bacteria	Chloroflexi	unc_Chloroflexi	unc_Chloroflexi	unc_Chloroflexi	unc_Chloroflexi	OTU_721 (unc_Chloroflexi)
OTU_327	Bacteria	Verrucomicrobia	Spartobacteria	Spartobacteria_genera_incertae_sedis	Spartobacteria_genera_incertae_sedis	Spartobacteria_genera_incertae_sedis	OTU_327 (unc_Spartobacteria_genera_incertae_sedis)
OTU_6107	Bacteria	Proteobacteria	Gammaproteobacteria	unc_Gammaproteobacteria	unc_Gammaproteobacteria	unc_Gammaproteobacteria	OTU_6107 (unc_Gammaproteobacteria)
OTU_331	Bacteria	Actinobacteria	Acidimicrobiia	Acidimicrobiales	unc_Acidimicrobiales	unc_Acidimicrobiales	OTU_331 (unc_Acidimicrobiales)
OTU_238	Bacteria	Actinobacteria	Actinobacteria	unc_Actinobacteria	unc_Actinobacteria	unc_Actinobacteria	OTU_238 (unc_Actinobacteria)
OTU_769	Bacteria	Acidobacteria	Acidobacteria_Gp5	Gp5	Gp5	Gp5	OTU_769 (unc_Gp5)
OTU_560	Bacteria	Actinobacteria	Actinobacteria	unc_Actinobacteria	unc_Actinobacteria	unc_Actinobacteria	OTU_560 (unc_Actinobacteria)
OTU_794	Bacteria	Bacteroidetes	Chitinophagia	Chitinophagales	Chitinophagaceae	Flavisolibacter	OTU_794 (unc_Flavisolibacter)
OTU_138	Bacteria	Actinobacteria	Actinobacteria	Propionibacteriales	Nocardioidaceae	Marmoricola	OTU_138 (unc_Marmoricola)
OTU_1294	Bacteria	Acidobacteria	Acidobacteria_Gp10	Gp10	Gp10	Gp10	OTU_1294 (unc_Gp10)
OTU_502	Bacteria	Gemmatimonadetes	Gemmatimonadetes	Gemmatimonadales	Gemmatimonadaceae	unc_Gemmatimonadaceae	OTU_502 (unc_Gemmatimonadaceae)
OTU_2813	Bacteria	Proteobacteria	Betaproteobacteria	unc_Betaproteobacteria	unc_Betaproteobacteria	unc_Betaproteobacteria	OTU_2813 (unc_Betaproteobacteria)
OTU_8906	Bacteria	Acidobacteria	Acidobacteria_Gp6	Gp6	Gp6	Gp6	OTU_8906 (unc_Gp6)
OTU_543	Bacteria	Bacteroidetes	Chitinophagia	Chitinophagales	Chitinophagaceae	unc_Chitinophagaceae	OTU_543 (unc_Chitinophagaceae)
OTU_4107	Bacteria	Acidobacteria	Acidobacteria_Gp6	Gp6	Gp6	Gp6	OTU_4107 (unc_Gp6)
OTU_647	Bacteria	Gemmatimonadetes	Gemmatimonadetes	Gemmatimonadales	Gemmatimonadaceae	unc_Gemmatimonadaceae	OTU_647 (unc_Gemmatimonadaceae)
OTU_536	Bacteria	Actinobacteria	Acidimicrobiia	Acidimicrobiales	Iamiaceae	Actinomarinicola	OTU_536 (unc_Actinomarinicola)
OTU_552	Bacteria	Firmicutes	Bacilli	Bacillales	Thermoactinomycetaceae1	Thermoflavimicrobium	OTU_552 (unc_Thermoflavimicrobium)
OTU_438	Bacteria	Firmicutes	Bacilli	Bacillales	Bacillaceae1	Alkalihalobacillus	OTU_438 (unc_Alkalihalobacillus)
OTU_1649	Bacteria	Acidobacteria	Acidobacteria_Gp6	Gp6	Gp6	Gp6	OTU_1649 (unc_Gp6)
OTU_1250	Bacteria	Firmicutes	Bacilli	Bacillales	Paenibacillaceae1	unc_Paenibacillaceae1	OTU_1250 (unc_Paenibacillaceae1)
OTU_917	Bacteria	Actinobacteria	Thermoleophilia	unc_Thermoleophilia	unc_Thermoleophilia	unc_Thermoleophilia	OTU_917 (unc_Thermoleophilia)
OTU_204	Bacteria	Actinobacteria	Actinobacteria	unc_Actinobacteria	unc_Actinobacteria	unc_Actinobacteria	OTU_204 (unc_Actinobacteria)
OTU_783	Bacteria	Actinobacteria	Thermoleophilia	Gaiellales	Gaiellaceae	Gaiella	OTU_783 (unc_Gaiella)
OTU_283	Bacteria	Actinobacteria	Acidimicrobiia	Acidimicrobiales	unc_Acidimicrobiales	unc_Acidimicrobiales	OTU_283 (unc_Acidimicrobiales)
OTU_547	Bacteria	unc_Bacteria	unc_Bacteria	unc_Bacteria	unc_Bacteria	unc_Bacteria	OTU_547 (unc_Bacteria)
OTU_1096	Bacteria	Actinobacteria	Thermoleophilia	Solirubrobacterales	unc_Solirubrobacterales	unc_Solirubrobacterales	OTU_1096 (unc_Solirubrobacterales)
OTU_1052	Bacteria	Acidobacteria	Acidobacteria_Gp6	Gp6	Gp6	Gp6	OTU_1052 (unc_Gp6)
OTU_887	Bacteria	Acidobacteria	Acidobacteria_Gp6	Gp6	Gp6	Gp6	OTU_887 (unc_Gp6)
OTU_1507	Bacteria	Gemmatimonadetes	Gemmatimonadetes	Gemmatimonadales	Gemmatimonadaceae	unc_Gemmatimonadaceae	OTU_1507 (unc_Gemmatimonadaceae)
OTU_490	Bacteria	Actinobacteria	Thermoleophilia	unc_Thermoleophilia	unc_Thermoleophilia	unc_Thermoleophilia	OTU_490 (unc_Thermoleophilia)
OTU_99	Bacteria	Actinobacteria	Thermoleophilia	Gaiellales	Gaiellaceae	Gaiella	OTU_99 (unc_Gaiella)
OTU_8109	Bacteria	Acidobacteria	Acidobacteria_Gp16	Gp16	Gp16	Gp16	OTU_8109 (unc_Gp16)
OTU_178	Bacteria	Proteobacteria	Alphaproteobacteria	Rhodospirillales	Reyranellaceae	Reyranella	OTU_178 (Reyranella_soli)
OTU_130	Bacteria	Actinobacteria	unc_Actinobacteria	unc_Actinobacteria	unc_Actinobacteria	unc_Actinobacteria	OTU_130 (unc_Actinobacteria)
OTU_698	Bacteria	Acidobacteria	Acidobacteria_Gp6	Gp6	Gp6	Gp6	OTU_698 (unc_Gp6)
OTU_839	Bacteria	unc_Bacteria	unc_Bacteria	unc_Bacteria	unc_Bacteria	unc_Bacteria	OTU_839 (unc_Bacteria)
OTU_2656	Bacteria	Verrucomicrobia	Spartobacteria	Spartobacteria_genera_incertae_sedis	Spartobacteria_genera_incertae_sedis	Spartobacteria_genera_incertae_sedis	OTU_2656 (unc_Spartobacteria_genera_incertae_sedis)
OTU_451	Bacteria	Actinobacteria	Actinobacteria	unc_Actinobacteria	unc_Actinobacteria	unc_Actinobacteria	OTU_451 (unc_Actinobacteria)
OTU_471	Bacteria	Proteobacteria	Gammaproteobacteria	Xanthomonadales	Xanthomonadaceae	Lysobacter	OTU_471 (unc_Lysobacter)
OTU_614	Bacteria	Firmicutes	Bacilli	Bacillales	Bacillaceae1	Alkalihalobacillus	OTU_614 (unc_Alkalihalobacillus)
OTU_1033	Bacteria	Gemmatimonadetes	Gemmatimonadetes	Gemmatimonadales	Gemmatimonadaceae	Roseisolibacter	OTU_1033 (unc_Roseisolibacter)
OTU_886	Bacteria	Proteobacteria	Alphaproteobacteria	Rhodospirillales	Acetobacteraceae	Roseomonas	OTU_886 (unc_Roseomonas)
OTU_220	Bacteria	Actinobacteria	Actinobacteria	Propionibacteriales	Propionibacteriaceae	Microlunatus	OTU_220 (unc_Microlunatus)
OTU_6861	Bacteria	Acidobacteria	Acidobacteria_Gp16	Gp16	Gp16	Gp16	OTU_6861 (unc_Gp16)
OTU_776	Bacteria	Acidobacteria	Acidobacteria_Gp16	Gp16	Gp16	Gp16	OTU_776 (unc_Gp16)
OTU_1831	Bacteria	Proteobacteria	Alphaproteobacteria	Rhizobiales	Methylobacteriaceae	Microvirga	OTU_1831 (unc_Microvirga)
OTU_842	Bacteria	Proteobacteria	Alphaproteobacteria	Sphingomonadales	Erythrobacteraceae	Altererythrobacter	OTU_842 (unc_Altererythrobacter)
OTU_1778	Bacteria	Acidobacteria	Acidobacteria_Gp5	Gp5	Gp5	Gp5	OTU_1778 (unc_Gp5)
OTU_909	Bacteria	Acidobacteria	Acidobacteria_Gp6	Gp6	Gp6	Gp6	OTU_909 (unc_Gp6)
OTU_493	Bacteria	Acidobacteria	Acidobacteria_Gp4	Gp4	Gp4	Gp4	OTU_493 (unc_Gp4)
OTU_500	Bacteria	unc_Bacteria	unc_Bacteria	unc_Bacteria	unc_Bacteria	unc_Bacteria	OTU_500 (unc_Bacteria)
OTU_190	Bacteria	Actinobacteria	unc_Actinobacteria	unc_Actinobacteria	unc_Actinobacteria	unc_Actinobacteria	OTU_190 (unc_Actinobacteria)
OTU_240	Bacteria	Chloroflexi	unc_Chloroflexi	unc_Chloroflexi	unc_Chloroflexi	unc_Chloroflexi	OTU_240 (unc_Chloroflexi)
OTU_1058	Bacteria	Armatimonadetes	Chthonomonadetes	Chthonomonadales	Chthonomonadaceae	Chthonomonas/Armatimonadetes	OTU_1058 (uncultured_bacterium)
OTU_2039	Bacteria	Acidobacteria	Acidobacteria_Gp6	Gp6	Gp6	Gp6	OTU_2039 (unc_Gp6)
OTU_871	Bacteria	Bacteroidetes	Chitinophagia	Chitinophagales	Chitinophagaceae	Flavitalea	OTU_871 (unc_Flavitalea)
OTU_6590	Bacteria	Actinobacteria	Thermoleophilia	Gaiellales	Gaiellaceae	Gaiella	OTU_6590 (unc_Gaiella)
OTU_4216	Bacteria	Acidobacteria	Acidobacteria_Gp6	Gp6	Gp6	Gp6	OTU_4216 (unc_Gp6)
OTU_1037	Bacteria	Acidobacteria	Acidobacteria_Gp6	Gp6	Gp6	Gp6	OTU_1037 (unc_Gp6)
OTU_7607	Bacteria	Acidobacteria	Acidobacteria_Gp6	Gp6	Gp6	Gp6	OTU_7607 (unc_Gp6)
OTU_9428	Bacteria	Acidobacteria	Acidobacteria_Gp16	Gp16	Gp16	Gp16	OTU_9428 (unc_Gp16)
OTU_925	Bacteria	Actinobacteria	Actinobacteria	Micromonosporales	Micromonosporaceae	unc_Micromonosporaceae	OTU_925 (unc_Micromonosporaceae)
OTU_292	Bacteria	Actinobacteria	Actinobacteria	unc_Actinobacteria	unc_Actinobacteria	unc_Actinobacteria	OTU_292 (unc_Actinobacteria)
OTU_5323	Bacteria	Proteobacteria	Alphaproteobacteria	Rhizobiales	Hyphomicrobiaceae	unc_Hyphomicrobiaceae	OTU_5323 (unc_Hyphomicrobiaceae)
OTU_402	Bacteria	Actinobacteria	Thermoleophilia	Gaiellales	Gaiellaceae	Gaiella	OTU_402 (unc_Gaiella)
OTU_859	Bacteria	Bacteroidetes	Chitinophagia	Chitinophagales	Chitinophagaceae	unc_Chitinophagaceae	OTU_859 (unc_Chitinophagaceae)
OTU_373	Bacteria	unc_Bacteria	unc_Bacteria	unc_Bacteria	unc_Bacteria	unc_Bacteria	OTU_373 (unc_Bacteria)
OTU_720	Bacteria	Chloroflexi	unc_Chloroflexi	unc_Chloroflexi	unc_Chloroflexi	unc_Chloroflexi	OTU_720 (unc_Chloroflexi)
OTU_940	Bacteria	Firmicutes	Bacilli	Bacillales	Paenibacillaceae1	Paenibacillus	OTU_940 (unc_Paenibacillus)
OTU_520	Bacteria	Chloroflexi	Thermomicrobia	Sphaerobacterales	Sphaerobacteraceae	unc_Sphaerobacteraceae	OTU_520 (unc_Sphaerobacteraceae)
OTU_791	Bacteria	unc_Bacteria	unc_Bacteria	unc_Bacteria	unc_Bacteria	unc_Bacteria	OTU_791 (unc_Bacteria)
OTU_969	Bacteria	Firmicutes	Bacilli	Bacillales	Paenibacillaceae1	Paenibacillus	OTU_969 (unc_Paenibacillus)
OTU_937	Bacteria	Actinobacteria	Actinobacteria	Geodermatophilales	Geodermatophilaceae	Modestobacter	OTU_937 (unc_Modestobacter)
OTU_320	Bacteria	unc_Bacteria	unc_Bacteria	unc_Bacteria	unc_Bacteria	unc_Bacteria	OTU_320 (unc_Bacteria)
OTU_1129	Bacteria	Proteobacteria	Alphaproteobacteria	Rhizobiales	unc_Rhizobiales	unc_Rhizobiales	OTU_1129 (unc_Rhizobiales)
OTU_630	Bacteria	Actinobacteria	unc_Actinobacteria	unc_Actinobacteria	unc_Actinobacteria	unc_Actinobacteria	OTU_630 (unc_Actinobacteria)
OTU_428	Bacteria	Gemmatimonadetes	Gemmatimonadetes	Gemmatimonadales	Gemmatimonadaceae	unc_Gemmatimonadaceae	OTU_428 (unc_Gemmatimonadaceae)
OTU_443	Bacteria	Actinobacteria	Actinobacteria	Propionibacteriales	Nocardioidaceae	Marmoricola	OTU_443 (unc_Marmoricola)
OTU_861	Bacteria	Acidobacteria	Acidobacteria_Gp6	Gp6	Gp6	Gp6	OTU_861 (unc_Gp6)
OTU_419	Bacteria	Proteobacteria	Betaproteobacteria	Nitrosomonadales	Nitrosomonadaceae	Nitrosospira	OTU_419 (unc_Nitrosospira)
OTU_668	Bacteria	Acidobacteria	Acidobacteria_Gp3	Gp3	Gp3	Gp3	OTU_668 (unc_Gp3)
OTU_1061	Bacteria	Actinobacteria	Thermoleophilia	Solirubrobacterales	unc_Solirubrobacterales	unc_Solirubrobacterales	OTU_1061 (unc_Solirubrobacterales)
OTU_1168	Bacteria	Acidobacteria	Acidobacteria_Gp17	Gp17	Gp17	Gp17	OTU_1168 (unc_Gp17)
OTU_727	Bacteria	Proteobacteria	Alphaproteobacteria	Rhizobiales	unc_Rhizobiales	unc_Rhizobiales	OTU_727 (unc_Rhizobiales)
OTU_338	Bacteria	Actinobacteria	unc_Actinobacteria	unc_Actinobacteria	unc_Actinobacteria	unc_Actinobacteria	OTU_338 (unc_Actinobacteria)
OTU_168	Bacteria	Actinobacteria	unc_Actinobacteria	unc_Actinobacteria	unc_Actinobacteria	unc_Actinobacteria	OTU_168 (unc_Actinobacteria)
OTU_526	Bacteria	Acidobacteria	Acidobacteria_Gp6	Gp6	Gp6	Gp6	OTU_526 (unc_Gp6)
OTU_1064	Bacteria	Chloroflexi	Thermomicrobia	Sphaerobacterales	Sphaerobacteraceae	unc_Sphaerobacteraceae	OTU_1064 (unc_Sphaerobacteraceae)
OTU_182	Bacteria	Actinobacteria	Thermoleophilia	Gaiellales	Gaiellaceae	Gaiella	OTU_182 (Gaiella_occulta)
OTU_296	Bacteria	Firmicutes	Clostridia	Clostridiales	Clostridiaceae1	Clostridiumsensustricto	OTU_296 (unc_Clostridiumsensustricto)
OTU_6277	Bacteria	Actinobacteria	Thermoleophilia	Gaiellales	Gaiellaceae	Gaiella	OTU_6277 (unc_Gaiella)
OTU_504	Bacteria	Proteobacteria	Alphaproteobacteria	Rhizobiales	Beijerinckiaceae	Beijerinckia	OTU_504 (unc_Beijerinckia)
OTU_1091	Bacteria	Actinobacteria	Thermoleophilia	unc_Thermoleophilia	unc_Thermoleophilia	unc_Thermoleophilia	OTU_1091 (unc_Thermoleophilia)
OTU_663	Bacteria	Gemmatimonadetes	Gemmatimonadetes	Gemmatimonadales	Gemmatimonadaceae	unc_Gemmatimonadaceae	OTU_663 (unc_Gemmatimonadaceae)
OTU_510	Bacteria	Acidobacteria	Acidobacteria	unc_Acidobacteria	unc_Acidobacteria	Gp4	OTU_510 (uncultured_soil)
OTU_390	Bacteria	unc_Bacteria	unc_Bacteria	unc_Bacteria	unc_Bacteria	unc_Bacteria	OTU_390 (unc_Bacteria)
OTU_686	Bacteria	Actinobacteria	Thermoleophilia	Gaiellales	Gaiellaceae	Gaiella	OTU_686 (unc_Gaiella)
OTU_4059	Bacteria	Gemmatimonadetes	Gemmatimonadetes	Gemmatimonadales	Gemmatimonadaceae	unc_Gemmatimonadaceae	OTU_4059 (unc_Gemmatimonadaceae)
OTU_658	Bacteria	Actinobacteria	Actinobacteria	unc_Actinobacteria	unc_Actinobacteria	unc_Actinobacteria	OTU_658 (unc_Actinobacteria)
OTU_7913	Bacteria	Actinobacteria	unc_Actinobacteria	unc_Actinobacteria	unc_Actinobacteria	unc_Actinobacteria	OTU_7913 (unc_Actinobacteria)
OTU_773	Bacteria	Acidobacteria	Acidobacteria_Gp4	Gp4	Gp4	Gp4	OTU_773 (unc_Gp4)
OTU_840	Bacteria	Proteobacteria	Deltaproteobacteria	Myxococcales	Polyangiaceae	Sorangium	OTU_840 (unc_Sorangium)
OTU_1252	Bacteria	Proteobacteria	Betaproteobacteria	unc_Betaproteobacteria	unc_Betaproteobacteria	unc_Betaproteobacteria	OTU_1252 (unc_Betaproteobacteria)
OTU_363	Bacteria	unc_Bacteria	unc_Bacteria	unc_Bacteria	unc_Bacteria	unc_Bacteria	OTU_363 (unc_Bacteria)
OTU_729	Bacteria	unc_Bacteria	unc_Bacteria	unc_Bacteria	unc_Bacteria	unc_Bacteria	OTU_729 (unc_Bacteria)
OTU_802	Bacteria	candidate division WPS-1	WPS-1_genera_incertae_sedis	WPS-1_genera_incertae_sedis	WPS-1_genera_incertae_sedis	WPS-1_genera_incertae_sedis	OTU_802 (unc_WPS-1_genera_incertae_sedis)
OTU_361	Bacteria	Proteobacteria	Alphaproteobacteria	Rhizobiales	unc_Rhizobiales	unc_Rhizobiales	OTU_361 (unc_Rhizobiales)
OTU_1660	Bacteria	Proteobacteria	Alphaproteobacteria	Rhizobiales	unc_Rhizobiales	unc_Rhizobiales	OTU_1660 (unc_Rhizobiales)
OTU_669	Bacteria	Proteobacteria	Deltaproteobacteria	Myxococcales	Cystobacteraceae	Cystobacter	OTU_669 (unc_Cystobacter)
OTU_2228	Bacteria	Acidobacteria	Acidobacteria_Gp7	Gp7	Gp7	Gp7	OTU_2228 (unc_Gp7)
OTU_4487	Bacteria	Chloroflexi	Caldilineae	Caldilineales	Caldilineaceae	Litorilinea	OTU_4487 (unc_Litorilinea)
OTU_1051	Bacteria	Proteobacteria	Alphaproteobacteria	Rhizobiales	unc_Rhizobiales	unc_Rhizobiales	OTU_1051 (unc_Rhizobiales)
OTU_559	Bacteria	Gemmatimonadetes	unc_Gemmatimonadetes	unc_Gemmatimonadetes	unc_Gemmatimonadetes	unc_Gemmatimonadetes	OTU_559 (unc_Gemmatimonadetes)
OTU_2552	Bacteria	Actinobacteria	Thermoleophilia	unc_Thermoleophilia	unc_Thermoleophilia	unc_Thermoleophilia	OTU_2552 (unc_Thermoleophilia)
OTU_1083	Bacteria	Chloroflexi	Thermomicrobia	Sphaerobacterales	Sphaerobacteraceae	unc_Sphaerobacteraceae	OTU_1083 (unc_Sphaerobacteraceae)
OTU_6434	Bacteria	Gemmatimonadetes	unc_Gemmatimonadetes	unc_Gemmatimonadetes	unc_Gemmatimonadetes	unc_Gemmatimonadetes	OTU_6434 (unc_Gemmatimonadetes)
OTU_450	Bacteria	Firmicutes	Bacilli	Bacillales	Paenibacillaceae1	Paenibacillus	OTU_450 (Paenibacillus_sepulcri)
OTU_205	Bacteria	Actinobacteria	Actinobacteria	Propionibacteriales	unc_Propionibacteriales	unc_Propionibacteriales	OTU_205 (unc_Propionibacteriales)
OTU_569	Bacteria	Proteobacteria	Alphaproteobacteria	Rhodospirillales	Geminicoccaceae	unc_Geminicoccaceae	OTU_569 (unc_Geminicoccaceae)
OTU_724	Bacteria	Nitrospirae	Nitrospira	Nitrospirales	Nitrospiraceae	Nitrospira	OTU_724 (unc_Nitrospira)
OTU_367	Bacteria	Acidobacteria	Acidobacteria_Gp16	Gp16	Gp16	Gp16	OTU_367 (unc_Gp16)
OTU_6073	Bacteria	Actinobacteria	Thermoleophilia	Solirubrobacterales	Conexibacteraceae	Conexibacter	OTU_6073 (unc_Conexibacter)
OTU_966	Bacteria	Acidobacteria	Acidobacteria_Gp6	Gp6	Gp6	Gp6	OTU_966 (unc_Gp6)
OTU_5588	Bacteria	Actinobacteria	Thermoleophilia	Solirubrobacterales	unc_Solirubrobacterales	unc_Solirubrobacterales	OTU_5588 (unc_Solirubrobacterales)
OTU_858	Bacteria	Proteobacteria	Gammaproteobacteria	Xanthomonadales	Xanthomonadaceae	Lysobacter	OTU_858 (Lysobacter_dokdonensis)
OTU_1661	Bacteria	Actinobacteria	Thermoleophilia	Gaiellales	Gaiellaceae	Gaiella	OTU_1661 (unc_Gaiella)
OTU_482	Bacteria	Acidobacteria	Acidobacteria_Gp6	Gp6	Gp6	Gp6	OTU_482 (unc_Gp6)
OTU_563	Bacteria	Verrucomicrobia	Spartobacteria	Spartobacteria_genera_incertae_sedis	Spartobacteria_genera_incertae_sedis	Spartobacteria_genera_incertae_sedis	OTU_563 (unc_Spartobacteria_genera_incertae_sedis)
OTU_427	Bacteria	Gemmatimonadetes	Gemmatimonadetes	Gemmatimonadales	Gemmatimonadaceae	unc_Gemmatimonadaceae	OTU_427 (unc_Gemmatimonadaceae)
OTU_710	Bacteria	unc_Bacteria	unc_Bacteria	unc_Bacteria	unc_Bacteria	unc_Bacteria	OTU_710 (unc_Bacteria)
OTU_266	Bacteria	Acidobacteria	Acidobacteria_Gp6	Gp6	Gp6	Gp6	OTU_266 (unc_Gp6)
OTU_1229	Bacteria	Acidobacteria	Acidobacteria_Gp10	Gp10	Gp10	Gp10	OTU_1229 (unc_Gp10)
OTU_1283	Bacteria	unc_Bacteria	unc_Bacteria	unc_Bacteria	unc_Bacteria	unc_Bacteria	OTU_1283 (unc_Bacteria)
OTU_633	Bacteria	Proteobacteria	Alphaproteobacteria	Micropepsales	Micropepsaceae	Rhizomicrobium	OTU_633 (unc_Rhizomicrobium)
OTU_834	Bacteria	unc_Bacteria	unc_Bacteria	unc_Bacteria	unc_Bacteria	unc_Bacteria	OTU_834 (unc_Bacteria)
OTU_1026	Bacteria	Actinobacteria	Actinobacteria	unc_Actinobacteria	unc_Actinobacteria	unc_Actinobacteria	OTU_1026 (unc_Actinobacteria)
OTU_2857	Bacteria	Actinobacteria	Thermoleophilia	Gaiellales	Gaiellaceae	Gaiella	OTU_2857 (unc_Gaiella)
OTU_1483	Bacteria	Acidobacteria	Acidobacteria_Gp6	Gp6	Gp6	Gp6	OTU_1483 (unc_Gp6)
OTU_1136	Bacteria	Chloroflexi	unc_Chloroflexi	unc_Chloroflexi	unc_Chloroflexi	unc_Chloroflexi	OTU_1136 (unc_Chloroflexi)
OTU_1577	Bacteria	Proteobacteria	Alphaproteobacteria	Rhizobiales	unc_Rhizobiales	unc_Rhizobiales	OTU_1577 (unc_Rhizobiales)
OTU_404	Bacteria	Actinobacteria	Thermoleophilia	unc_Thermoleophilia	unc_Thermoleophilia	unc_Thermoleophilia	OTU_404 (unc_Thermoleophilia)
OTU_326	Bacteria	Proteobacteria	Alphaproteobacteria	Rhizobiales	Rhizobiaceae	Rhizobium	OTU_326 (unc_Rhizobium)
OTU_814	Bacteria	Gemmatimonadetes	Gemmatimonadetes	Gemmatimonadales	Gemmatimonadaceae	unc_Gemmatimonadaceae	OTU_814 (unc_Gemmatimonadaceae)
OTU_1137	Bacteria	unc_Bacteria	unc_Bacteria	unc_Bacteria	unc_Bacteria	unc_Bacteria	OTU_1137 (unc_Bacteria)
OTU_393	Bacteria	Acidobacteria	Acidobacteria_Gp6	Gp6	Gp6	Gp6	OTU_393 (unc_Gp6)
OTU_949	Bacteria	Proteobacteria	Alphaproteobacteria	Rhodospirillales	unc_Rhodospirillales	unc_Rhodospirillales	OTU_949 (unc_Rhodospirillales)
OTU_1078	Bacteria	Chloroflexi	Anaerolineae	Anaerolineales	Anaerolineaceae	unc_Anaerolineaceae	OTU_1078 (unc_Anaerolineaceae)
OTU_448	Bacteria	unc_Bacteria	unc_Bacteria	unc_Bacteria	unc_Bacteria	unc_Bacteria	OTU_448 (unc_Bacteria)
OTU_297	Bacteria	Actinobacteria	Actinobacteria	Frankiales	Frankiaceae	Jatrophihabitans	OTU_297 (unc_Jatrophihabitans)
OTU_4911	Bacteria	unc_Bacteria	unc_Bacteria	unc_Bacteria	unc_Bacteria	unc_Bacteria	OTU_4911 (unc_Bacteria)
OTU_1591	Bacteria	Acidobacteria	Acidobacteria_Gp5	Gp5	Gp5	Gp5	OTU_1591 (unc_Gp5)
OTU_587	Bacteria	unc_Bacteria	unc_Bacteria	unc_Bacteria	unc_Bacteria	unc_Bacteria	OTU_587 (unc_Bacteria)
OTU_2083	Bacteria	unc_Bacteria	unc_Bacteria	unc_Bacteria	unc_Bacteria	unc_Bacteria	OTU_2083 (unc_Bacteria)
OTU_714	Bacteria	Actinobacteria	unc_Actinobacteria	unc_Actinobacteria	unc_Actinobacteria	unc_Actinobacteria	OTU_714 (unc_Actinobacteria)
OTU_903	Bacteria	unc_Bacteria	unc_Bacteria	unc_Bacteria	unc_Bacteria	unc_Bacteria	OTU_903 (unc_Bacteria)
OTU_2760	Bacteria	Actinobacteria	Thermoleophilia	unc_Thermoleophilia	unc_Thermoleophilia	unc_Thermoleophilia	OTU_2760 (unc_Thermoleophilia)
OTU_1463	Bacteria	Proteobacteria	Deltaproteobacteria	Myxococcales	unc_Myxococcales	unc_Myxococcales	OTU_1463 (unc_Myxococcales)
OTU_994	Bacteria	Acidobacteria	Acidobacteria_Gp6	Gp6	Gp6	Gp6	OTU_994 (unc_Gp6)
OTU_6224	Bacteria	unc_Bacteria	unc_Bacteria	unc_Bacteria	unc_Bacteria	unc_Bacteria	OTU_6224 (unc_Bacteria)
OTU_3670	Bacteria	Proteobacteria	Betaproteobacteria	Burkholderiales	Comamonadaceae	Ramlibacter	OTU_3670 (unc_Ramlibacter)
OTU_3834	Bacteria	Acidobacteria	Acidobacteria_Gp3	Gp3	Gp3	Gp3	OTU_3834 (unc_Gp3)
OTU_1184	Bacteria	Gemmatimonadetes	Gemmatimonadetes	Gemmatimonadales	Gemmatimonadaceae	unc_Gemmatimonadaceae	OTU_1184 (unc_Gemmatimonadaceae)
OTU_6723	Bacteria	Acidobacteria	Acidobacteria_Gp6	Gp6	Gp6	Gp6	OTU_6723 (unc_Gp6)
OTU_1445	Bacteria	Actinobacteria	unc_Actinobacteria	unc_Actinobacteria	unc_Actinobacteria	unc_Actinobacteria	OTU_1445 (unc_Actinobacteria)
OTU_907	Bacteria	Acidobacteria	Acidobacteria_Gp6	Gp6	Gp6	Gp6	OTU_907 (unc_Gp6)
OTU_1436	Bacteria	Actinobacteria	unc_Actinobacteria	unc_Actinobacteria	unc_Actinobacteria	unc_Actinobacteria	OTU_1436 (unc_Actinobacteria)
OTU_535	Bacteria	Acidobacteria	Acidobacteria_Gp6	Gp6	Gp6	Gp6	OTU_535 (unc_Gp6)
OTU_2557	Bacteria	Actinobacteria	Actinobacteria	Streptosporangiales	Thermomonosporaceae	Actinoallomurus	OTU_2557 (unc_Actinoallomurus)
OTU_1128	Bacteria	Proteobacteria	Alphaproteobacteria	Rhodospirillales	unc_Rhodospirillales	unc_Rhodospirillales	OTU_1128 (unc_Rhodospirillales)
OTU_642	Bacteria	unc_Bacteria	unc_Bacteria	unc_Bacteria	unc_Bacteria	unc_Bacteria	OTU_642 (unc_Bacteria)
OTU_2169	Bacteria	Acidobacteria	Acidobacteria_Gp6	Gp6	Gp6	Gp6	OTU_2169 (unc_Gp6)
OTU_982	Bacteria	Actinobacteria	Thermoleophilia	Solirubrobacterales	unc_Solirubrobacterales	unc_Solirubrobacterales	OTU_982 (unc_Solirubrobacterales)
OTU_1586	Bacteria	unc_Bacteria	unc_Bacteria	unc_Bacteria	unc_Bacteria	unc_Bacteria	OTU_1586 (unc_Bacteria)
OTU_805	Bacteria	Firmicutes	Bacilli	Bacillales	Bacillaceae1	Parageobacillus	OTU_805 (unc_Parageobacillus)
OTU_785	Bacteria	Chloroflexi	Caldilineae	Caldilineales	Caldilineaceae	Litorilinea	OTU_785 (unc_Litorilinea)
OTU_498	Bacteria	candidate division WPS-1	WPS-1_genera_incertae_sedis	WPS-1_genera_incertae_sedis	WPS-1_genera_incertae_sedis	WPS-1_genera_incertae_sedis	OTU_498 (unc_WPS-1_genera_incertae_sedis)
OTU_818	Bacteria	Firmicutes	Bacilli	Bacillales	Bacillaceae1	unc_Bacillaceae1	OTU_818 (unc_Bacillaceae1)
OTU_810	Bacteria	Acidobacteria	Acidobacteria_Gp17	Gp17	Gp17	Gp17	OTU_810 (unc_Gp17)
OTU_2202	Bacteria	Proteobacteria	Gammaproteobacteria	Nevskiales	Steroidobacteraceae	Steroidobacter	OTU_2202 (Steroidobacter_agariperforans)
OTU_1361	Bacteria	Firmicutes	Bacilli	Bacillales	Bacillaceae1	Domibacillus	OTU_1361 (unc_Domibacillus)
OTU_635	Bacteria	Chloroflexi	Chloroflexia	Chloroflexales	Roseiflexaceae	unc_Roseiflexaceae	OTU_635 (unc_Roseiflexaceae)
OTU_9118	Bacteria	Actinobacteria	Actinobacteria	Micromonosporales	Micromonosporaceae	unc_Micromonosporaceae	OTU_9118 (unc_Micromonosporaceae)
OTU_1343	Bacteria	unc_Bacteria	unc_Bacteria	unc_Bacteria	unc_Bacteria	unc_Bacteria	OTU_1343 (unc_Bacteria)
OTU_894	Bacteria	Actinobacteria	Actinobacteria	Glycomycetales	Glycomycetaceae	Glycomyces	OTU_894 (unc_Glycomyces)
OTU_2035	Bacteria	Bacteroidetes	Cytophagia	Cytophagales	Fulvivirgaceae	Ohtaekwangia	OTU_2035 (Ohtaekwangia_koreensis)
OTU_1424	Bacteria	Acidobacteria	Acidobacteria_Gp17	Gp17	Gp17	Gp17	OTU_1424 (unc_Gp17)
OTU_875	Bacteria	Acidobacteria	Acidobacteria	unc_Acidobacteria	unc_Acidobacteria	Gp6	OTU_875 (unc_Gp6)
OTU_464	Bacteria	Actinobacteria	unc_Actinobacteria	unc_Actinobacteria	unc_Actinobacteria	unc_Actinobacteria	OTU_464 (unc_Actinobacteria)
OTU_852	Bacteria	Proteobacteria	Alphaproteobacteria	Rhizobiales	Bradyrhizobiaceae	unc_Bradyrhizobiaceae	OTU_852 (unc_Bradyrhizobiaceae)
OTU_1100	Bacteria	unc_Bacteria	unc_Bacteria	unc_Bacteria	unc_Bacteria	unc_Bacteria	OTU_1100 (unc_Bacteria)
OTU_4004	Bacteria	Acidobacteria	Acidobacteria_Gp7	Gp7	Gp7	Gp7	OTU_4004 (unc_Gp7)
OTU_709	Bacteria	unc_Bacteria	unc_Bacteria	unc_Bacteria	unc_Bacteria	unc_Bacteria	OTU_709 (unc_Bacteria)
OTU_1760	Bacteria	Gemmatimonadetes	Gemmatimonadetes	Gemmatimonadales	Gemmatimonadaceae	unc_Gemmatimonadaceae	OTU_1760 (unc_Gemmatimonadaceae)
OTU_612	Bacteria	Acidobacteria	Blastocatellia	Blastocatellales	Arenimicrobiaceae	Arenimicrobium	OTU_612 (Arenimicrobium_luteum)
OTU_869	Bacteria	Acidobacteria	Acidobacteria_Gp3	Gp3	Gp3	Gp3	OTU_869 (unc_Gp3)
OTU_831	Bacteria	Gemmatimonadetes	Gemmatimonadetes	Gemmatimonadales	Gemmatimonadaceae	unc_Gemmatimonadaceae	OTU_831 (unc_Gemmatimonadaceae)
OTU_9003	Bacteria	Acidobacteria	Acidobacteria_Gp6	Gp6	Gp6	Gp6	OTU_9003 (unc_Gp6)
OTU_291	Bacteria	Acidobacteria	Acidobacteria_Gp10	Gp10	Gp10	Gp10	OTU_291 (unc_Gp10)
OTU_627	Bacteria	unc_Bacteria	unc_Bacteria	unc_Bacteria	unc_Bacteria	unc_Bacteria	OTU_627 (unc_Bacteria)
OTU_2485	Bacteria	Planctomycetes	Planctomycetacia	Planctomycetales	Isosphaeraceae	unc_Isosphaeraceae	OTU_2485 (unc_Isosphaeraceae)
OTU_1456	Bacteria	Proteobacteria	Betaproteobacteria	Burkholderiales	Burkholderiaceae	Lautropia	OTU_1456 (unc_Lautropia)
OTU_625	Bacteria	Acidobacteria	Acidobacteria_Gp25	Gp25	Gp25	Gp25	OTU_625 (unc_Gp25)
OTU_5065	Bacteria	Proteobacteria	Alphaproteobacteria	Rhodospirillales	unc_Rhodospirillales	unc_Rhodospirillales	OTU_5065 (unc_Rhodospirillales)
OTU_4796	Bacteria	Actinobacteria	Thermoleophilia	Solirubrobacterales	unc_Solirubrobacterales	unc_Solirubrobacterales	OTU_4796 (unc_Solirubrobacterales)
OTU_664	Bacteria	Proteobacteria	Gammaproteobacteria	Chromatiales	unc_Chromatiales	unc_Chromatiales	OTU_664 (unc_Chromatiales)
OTU_1073	Bacteria	Acidobacteria	Acidobacteria_Gp3	Gp3	Gp3	Gp3	OTU_1073 (unc_Gp3)
OTU_1528	Bacteria	Firmicutes	Bacilli	Bacillales	Paenibacillaceae1	Brevibacillus	OTU_1528 (unc_Brevibacillus)
OTU_6804	Bacteria	Actinobacteria	Actinobacteria	Mycobacteriales	Mycobacteriaceae	Mycobacterium	OTU_6804 (unc_Mycobacterium)
OTU_424	Bacteria	Proteobacteria	Deltaproteobacteria	Myxococcales	unc_Myxococcales	unc_Myxococcales	OTU_424 (unc_Myxococcales)
OTU_1069	Bacteria	Proteobacteria	Deltaproteobacteria	Myxococcales	Nannocystaceae	Nannocystis	OTU_1069 (unc_Nannocystis)
OTU_742	Bacteria	Verrucomicrobia	Spartobacteria	Spartobacteria_genera_incertae_sedis	Spartobacteria_genera_incertae_sedis	Spartobacteria_genera_incertae_sedis	OTU_742 (unc_Spartobacteria_genera_incertae_sedis)
OTU_621	Bacteria	unc_Bacteria	unc_Bacteria	unc_Bacteria	unc_Bacteria	unc_Bacteria	OTU_621 (unc_Bacteria)
OTU_676	Bacteria	Acidobacteria	Acidobacteria_Gp6	Gp6	Gp6	Gp6	OTU_676 (unc_Gp6)
OTU_671	Bacteria	Actinobacteria	Actinobacteria	Micrococcales	Microbacteriaceae	Agromyces	OTU_671 (unc_Agromyces)
OTU_1814	Bacteria	Proteobacteria	Betaproteobacteria	Burkholderiales	Comamonadaceae	unc_Comamonadaceae	OTU_1814 (unc_Comamonadaceae)
OTU_7078	Bacteria	Acidobacteria	Acidobacteria_Gp1	Gp1	Gp1	Gp1	OTU_7078 (unc_Gp1)
OTU_3755	Bacteria	Firmicutes	Bacilli	Bacillales	Bacillaceae 1	Bacillus	OTU_3755 (unc_Bacillus)
OTU_192	Bacteria	Nitrospirae	Nitrospira	Nitrospirales	Nitrospiraceae	Nitrospira	OTU_192 (Nitrospira_japonica)
OTU_610	Bacteria	unc_Bacteria	unc_Bacteria	unc_Bacteria	unc_Bacteria	unc_Bacteria	OTU_610 (unc_Bacteria)
OTU_7108	Bacteria	Actinobacteria	Thermoleophilia	Solirubrobacterales	unc_Solirubrobacterales	unc_Solirubrobacterales	OTU_7108 (unc_Solirubrobacterales)
OTU_3325	Bacteria	Acidobacteria	Acidobacteria_Gp6	Gp6	Gp6	Gp6	OTU_3325 (unc_Gp6)
OTU_632	Bacteria	Actinobacteria	Thermoleophilia	Solirubrobacterales	unc_Solirubrobacterales	unc_Solirubrobacterales	OTU_632 (unc_Solirubrobacterales)
OTU_6251	Bacteria	Firmicutes	Bacilli	Bacillales	Alicyclobacillaceae	Tumebacillus	OTU_6251 (unc_Tumebacillus)
OTU_1160	Bacteria	Acidobacteria	Acidobacteria_Gp6	Gp6	Gp6	Gp6	OTU_1160 (unc_Gp6)
OTU_1090	Bacteria	Actinobacteria	Thermoleophilia	Gaiellales	Gaiellaceae	Gaiella	OTU_1090 (unc_Gaiella)
OTU_143	Bacteria	Proteobacteria	Betaproteobacteria	Burkholderiales	unc_Burkholderiales	unc_Burkholderiales	OTU_143 (unc_Burkholderiales)
OTU_3042	Bacteria	Proteobacteria	Gammaproteobacteria	Gammaproteobacteria_incertae	unc_Gammaproteobacteria_incertae	Acidibacter	OTU_3042 (Acidibacter_ferrireducens)
OTU_770	Bacteria	Proteobacteria	Alphaproteobacteria	Rhodobacterales	Rhodobacteraceae	unc_Rhodobacteraceae	OTU_770 (unc_Rhodobacteraceae)
OTU_1382	Bacteria	Proteobacteria	Alphaproteobacteria	unc_Alphaproteobacteria	unc_Alphaproteobacteria	unc_Alphaproteobacteria	OTU_1382 (unc_Alphaproteobacteria)
OTU_1063	Bacteria	Acidobacteria	Acidobacteria_Gp6	Gp6	Gp6	Gp6	OTU_1063 (unc_Gp6)
OTU_772	Bacteria	Actinobacteria	Thermoleophilia	unc_Thermoleophilia	unc_Thermoleophilia	unc_Thermoleophilia	OTU_772 (unc_Thermoleophilia)
OTU_2577	Bacteria	Actinobacteria	Thermoleophilia	Gaiellales	Gaiellaceae	Gaiella	OTU_2577 (Gaiella_occulta)
OTU_2661	Bacteria	Proteobacteria	Gammaproteobacteria	Gammaproteobacteria_incertae	unc_Gammaproteobacteria_incertae	Acidibacter	OTU_2661 (Acidibacter_ferrireducens)
OTU_462	Bacteria	Actinobacteria	Actinobacteria	Streptosporangiales	Thermomonosporaceae	Actinocorallia	OTU_462 (unc_Actinocorallia)
OTU_9141	Bacteria	Acidobacteria	Acidobacteria_Gp6	Gp6	Gp6	Gp6	OTU_9141 (unc_Gp6)
OTU_1337	Bacteria	Actinobacteria	Thermoleophilia	Solirubrobacterales	unc_Solirubrobacterales	unc_Solirubrobacterales	OTU_1337 (unc_Solirubrobacterales)
OTU_9031	Bacteria	Actinobacteria	Thermoleophilia	Solirubrobacterales	unc_Solirubrobacterales	unc_Solirubrobacterales	OTU_9031 (unc_Solirubrobacterales)
OTU_439	Bacteria	Acidobacteria	Acidobacteria	unc_Acidobacteria	unc_Acidobacteria	Gp16	OTU_439 (uncultured_Acidobacteria)
OTU_1025	Bacteria	Acidobacteria	Acidobacteria_Gp6	Gp6	Gp6	Gp6	OTU_1025 (unc_Gp6)
OTU_828	Bacteria	Gemmatimonadetes	Gemmatimonadetes	Gemmatimonadales	Gemmatimonadaceae	unc_Gemmatimonadaceae	OTU_828 (unc_Gemmatimonadaceae)
OTU_2105	Bacteria	Acidobacteria	Acidobacteria_Gp6	Gp6	Gp6	Gp6	OTU_2105 (unc_Gp6)
OTU_146	Bacteria	Actinobacteria	Acidimicrobiia	Acidimicrobiales	unc_Acidimicrobiales	unc_Acidimicrobiales	OTU_146 (unc_Acidimicrobiales)
OTU_1631	Bacteria	Bacteroidetes	Cytophagia	Cytophagales	Hymenobacteraceae	Adhaeribacter	OTU_1631 (Adhaeribacter_terrae)
OTU_1221	Bacteria	Gemmatimonadetes	unc_Gemmatimonadetes	unc_Gemmatimonadetes	unc_Gemmatimonadetes	unc_Gemmatimonadetes	OTU_1221 (unc_Gemmatimonadetes)
OTU_1447	Bacteria	Proteobacteria	Betaproteobacteria	unc_Betaproteobacteria	unc_Betaproteobacteria	unc_Betaproteobacteria	OTU_1447 (unc_Betaproteobacteria)
OTU_2870	Bacteria	Proteobacteria	Alphaproteobacteria	Rhodospirillales	Azospirillaceae	unc_Azospirillaceae	OTU_2870 (unc_Azospirillaceae)
OTU_2635	Bacteria	Actinobacteria	Actinobacteria	unc_Actinobacteria	unc_Actinobacteria	unc_Actinobacteria	OTU_2635 (unc_Actinobacteria)
OTU_1511	Bacteria	Proteobacteria	Alphaproteobacteria	Rhodobacterales	Rhodobacteraceae	Amaricoccus	OTU_1511 (unc_Amaricoccus)
OTU_816	Bacteria	unc_Bacteria	unc_Bacteria	unc_Bacteria	unc_Bacteria	unc_Bacteria	OTU_816 (unc_Bacteria)
OTU_576	Bacteria	Acidobacteria	Acidobacteria_Gp4	Gp4	Gp4	Gp4	OTU_576 (unc_Gp4)
OTU_611	Bacteria	Acidobacteria	Acidobacteria_Gp18	Gp18	Gp18	Gp18	OTU_611 (unc_Gp18)
OTU_9621	Bacteria	Actinobacteria	Actinobacteria	unc_Actinobacteria	unc_Actinobacteria	unc_Actinobacteria	OTU_9621 (unc_Actinobacteria)
OTU_756	Bacteria	Acidobacteria	Acidobacteria_Gp17	Gp17	Gp17	Gp17	OTU_756 (unc_Gp17)
OTU_622	Bacteria	Actinobacteria	Actinobacteria	Propionibacteriales	Nocardioidaceae	Marmoricola	OTU_622 (unc_Marmoricola)
OTU_995	Bacteria	candidate division WPS-1	WPS-1_genera_incertae_sedis	WPS-1_genera_incertae_sedis	WPS-1_genera_incertae_sedis	WPS-1_genera_incertae_sedis	OTU_995 (unc_WPS-1_genera_incertae_sedis)
OTU_5084	Bacteria	Actinobacteria	Thermoleophilia	Solirubrobacterales	unc_Solirubrobacterales	unc_Solirubrobacterales	OTU_5084 (unc_Solirubrobacterales)
OTU_1205	Bacteria	Proteobacteria	Betaproteobacteria	unc_Betaproteobacteria	unc_Betaproteobacteria	unc_Betaproteobacteria	OTU_1205 (unc_Betaproteobacteria)
OTU_2548	Bacteria	Chloroflexi	Thermomicrobia	Sphaerobacterales	Sphaerobacteraceae	unc_Sphaerobacteraceae	OTU_2548 (unc_Sphaerobacteraceae)
OTU_2100	Bacteria	Actinobacteria	Actinobacteria	Kineosporiales	Kineosporiaceae	unc_Kineosporiaceae	OTU_2100 (unc_Kineosporiaceae)
OTU_227	Bacteria	Actinobacteria	Acidimicrobiia	Acidimicrobiales	Ilumatobacteraceae	unc_Ilumatobacteraceae	OTU_227 (unc_Ilumatobacteraceae)
OTU_1233	Bacteria	Actinobacteria	Acidimicrobiia	Acidimicrobiales	unc_Acidimicrobiales	unc_Acidimicrobiales	OTU_1233 (unc_Acidimicrobiales)
OTU_1157	Bacteria	Actinobacteria	Acidimicrobiia	Acidimicrobiales	Iamiaceae	unc_Iamiaceae	OTU_1157 (unc_Iamiaceae)
OTU_6197	Bacteria	Acidobacteria	Blastocatellia	Blastocatellales	Blastocatellaceae	Stenotrophobacter	OTU_6197 (unc_Stenotrophobacter)
OTU_766	Bacteria	Actinobacteria	unc_Actinobacteria	unc_Actinobacteria	unc_Actinobacteria	unc_Actinobacteria	OTU_766 (unc_Actinobacteria)
OTU_1195	Bacteria	Nitrospirae	Nitrospira	Nitrospirales	Nitrospiraceae	Nitrospira	OTU_1195 (unc_Nitrospira)
OTU_780	Bacteria	Actinobacteria	Acidimicrobiia	Acidimicrobiales	Iamiaceae	Actinomarinicola	OTU_780 (unc_Actinomarinicola)
OTU_2021	Bacteria	Actinobacteria	Actinobacteria	unc_Actinobacteria	unc_Actinobacteria	unc_Actinobacteria	OTU_2021 (unc_Actinobacteria)
OTU_844	Bacteria	Acidobacteria	Acidobacteria_Gp6	Gp6	Gp6	Gp6	OTU_844 (unc_Gp6)
OTU_1277	Bacteria	Proteobacteria	Alphaproteobacteria	Sphingomonadales	Erythrobacteraceae	Erythrobacter	OTU_1277 (unc_Erythrobacter)
OTU_1238	Bacteria	Gemmatimonadetes	Gemmatimonadetes	Gemmatimonadales	Gemmatimonadaceae	unc_Gemmatimonadaceae	OTU_1238 (unc_Gemmatimonadaceae)
OTU_529	Bacteria	Chloroflexi	Caldilineae	Caldilineales	Caldilineaceae	unc_Caldilineaceae	OTU_529 (unc_Caldilineaceae)
OTU_1030	Bacteria	unc_Bacteria	unc_Bacteria	unc_Bacteria	unc_Bacteria	unc_Bacteria	OTU_1030 (unc_Bacteria)
OTU_1404	Bacteria	Proteobacteria	Betaproteobacteria	unc_Betaproteobacteria	unc_Betaproteobacteria	unc_Betaproteobacteria	OTU_1404 (unc_Betaproteobacteria)
OTU_1624	Bacteria	Proteobacteria	Deltaproteobacteria	Myxococcales	unc_Myxococcales	unc_Myxococcales	OTU_1624 (unc_Myxococcales)
OTU_1861	Bacteria	Proteobacteria	Betaproteobacteria	unc_Betaproteobacteria	unc_Betaproteobacteria	unc_Betaproteobacteria	OTU_1861 (unc_Betaproteobacteria)
OTU_534	Bacteria	Acidobacteria	Acidobacteria	unc_Acidobacteria	unc_Acidobacteria	unc_Acidobacteria	OTU_534 (unc_Acidobacteria)
OTU_808	Bacteria	Acidobacteria	Acidobacteria_Gp1	Edaphobacter	Edaphobacter	Edaphobacter	OTU_808 (unc_Edaphobacter)
OTU_1409	Bacteria	Acidobacteria	Acidobacteria_Gp6	Gp6	Gp6	Gp6	OTU_1409 (unc_Gp6)
OTU_1590	Bacteria	unc_Bacteria	unc_Bacteria	unc_Bacteria	unc_Bacteria	unc_Bacteria	OTU_1590 (unc_Bacteria)
OTU_1462	Bacteria	Actinobacteria	Thermoleophilia	Gaiellales	Gaiellaceae	Gaiella	OTU_1462 (unc_Gaiella)
OTU_8380	Bacteria	Acidobacteria	Acidobacteria_Gp17	Gp17	Gp17	Gp17	OTU_8380 (unc_Gp17)
OTU_864	Bacteria	Chloroflexi	unc_Chloroflexi	unc_Chloroflexi	unc_Chloroflexi	unc_Chloroflexi	OTU_864 (unc_Chloroflexi)
OTU_288	Bacteria	Acidobacteria	Acidobacteria_Gp3	Gp3	Gp3	Gp3	OTU_288 (unc_Gp3)
OTU_501	Bacteria	Chloroflexi	Anaerolineae	Anaerolineales	Anaerolineaceae	unc_Anaerolineaceae	OTU_501 (unc_Anaerolineaceae)
OTU_2308	Bacteria	unc_Bacteria	unc_Bacteria	unc_Bacteria	unc_Bacteria	unc_Bacteria	OTU_2308 (unc_Bacteria)
OTU_1884	Bacteria	Acidobacteria	Acidobacteria_Gp5	Gp5	Gp5	Gp5	OTU_1884 (unc_Gp5)
OTU_2085	Bacteria	Proteobacteria	Alphaproteobacteria	Rhizobiales	Hyphomicrobiaceae	Hyphomicrobium	OTU_2085 (unc_Hyphomicrobium)
OTU_3486	Bacteria	Acidobacteria	Acidobacteria_Gp3	Gp3	Gp3	Gp3	OTU_3486 (unc_Gp3)
OTU_901	Bacteria	BRC1	BRC1_genera_incertae_sedis	BRC1_genera_incertae_sedis	BRC1_genera_incertae_sedis	BRC1_genera_incertae_sedis	OTU_901 (unc_BRC1_genera_incertae_sedis)
OTU_1131	Bacteria	Proteobacteria	Alphaproteobacteria	Rhodospirillales	Acetobacteraceae	unc_Acetobacteraceae	OTU_1131 (unc_Acetobacteraceae)
OTU_1237	Bacteria	Firmicutes	Bacilli	Bacillales	Planococcaceae	unc_Planococcaceae	OTU_1237 (unc_Planococcaceae)
OTU_488	Bacteria	Actinobacteria	Acidimicrobiia	Acidimicrobiales	Iamiaceae	unc_Iamiaceae	OTU_488 (unc_Iamiaceae)
OTU_958	Bacteria	unc_Bacteria	unc_Bacteria	unc_Bacteria	unc_Bacteria	unc_Bacteria	OTU_958 (unc_Bacteria)
OTU_1050	Bacteria	Gemmatimonadetes	Gemmatimonadetes	Gemmatimonadales	Gemmatimonadaceae	unc_Gemmatimonadaceae	OTU_1050 (unc_Gemmatimonadaceae)
OTU_1122	Bacteria	BRC1	BRC1_genera_incertae_sedis	BRC1_genera_incertae_sedis	BRC1_genera_incertae_sedis	BRC1_genera_incertae_sedis	OTU_1122 (unc_BRC1_genera_incertae_sedis)
OTU_882	Archaea	Thaumarchaeota	unc_Thaumarchaeota	Nitrososphaerales	Nitrososphaeraceae	Nitrososphaera	OTU_882 (Nitrososphaera_viennensis)
OTU_774	Bacteria	Firmicutes	Bacilli	Bacillales	Thermoactinomycetaceae2	Planifilum	OTU_774 (unc_Planifilum)
OTU_286	Bacteria	Actinobacteria	Acidimicrobiia	Acidimicrobiales	unc_Acidimicrobiales	unc_Acidimicrobiales	OTU_286 (unc_Acidimicrobiales)
OTU_948	Bacteria	unc_Bacteria	unc_Bacteria	unc_Bacteria	unc_Bacteria	unc_Bacteria	OTU_948 (unc_Bacteria)
OTU_853	Bacteria	Actinobacteria	Acidimicrobiia	Acidimicrobiales	unc_Acidimicrobiales	unc_Acidimicrobiales	OTU_853 (unc_Acidimicrobiales)
OTU_1120	Bacteria	Acidobacteria	Blastocatellia	Blastocatellales	Blastocatellaceae	unc_Blastocatellaceae	OTU_1120 (unc_Blastocatellaceae)
OTU_508	Bacteria	Actinobacteria	Actinobacteria	unc_Actinobacteria	unc_Actinobacteria	unc_Actinobacteria	OTU_508 (unc_Actinobacteria)
OTU_662	Bacteria	candidate division WPS-1	WPS-1_genera_incertae_sedis	WPS-1_genera_incertae_sedis	WPS-1_genera_incertae_sedis	WPS-1_genera_incertae_sedis	OTU_662 (unc_WPS-1_genera_incertae_sedis)
OTU_5679	Bacteria	Acidobacteria	Acidobacteria_Gp3	Gp3	Gp3	Gp3	OTU_5679 (unc_Gp3)
OTU_648	Bacteria	Chloroflexi	Thermomicrobia	Sphaerobacterales	Sphaerobacteraceae	Sphaerobacter	OTU_648 (unc_Sphaerobacter)
OTU_1024	Bacteria	unc_Bacteria	unc_Bacteria	unc_Bacteria	unc_Bacteria	unc_Bacteria	OTU_1024 (unc_Bacteria)
OTU_1170	Bacteria	Acidobacteria	Acidobacteria_Gp10	Gp10	Gp10	Gp10	OTU_1170 (unc_Gp10)
OTU_1212	Bacteria	Actinobacteria	Thermoleophilia	Solirubrobacterales	unc_Solirubrobacterales	unc_Solirubrobacterales	OTU_1212 (unc_Solirubrobacterales)
OTU_860	Bacteria	Verrucomicrobia	Verrucomicrobiae	Verrucomicrobiales	Verrucomicrobiaceae	Phragmitibacter	OTU_860 (unc_Phragmitibacter)
OTU_1255	Bacteria	Acidobacteria	Acidobacteria_Gp4	Gp4	Gp4	Gp4	OTU_1255 (unc_Gp4)
OTU_918	Bacteria	Chloroflexi	unc_Chloroflexi	unc_Chloroflexi	unc_Chloroflexi	unc_Chloroflexi	OTU_918 (unc_Chloroflexi)
OTU_998	Bacteria	unc_Bacteria	unc_Bacteria	unc_Bacteria	unc_Bacteria	unc_Bacteria	OTU_998 (unc_Bacteria)
OTU_1473	Bacteria	Actinobacteria	unc_Actinobacteria	unc_Actinobacteria	unc_Actinobacteria	unc_Actinobacteria	OTU_1473 (unc_Actinobacteria)
OTU_688	Bacteria	Proteobacteria	Alphaproteobacteria	Rhodospirillales	Azospirillaceae	unc_Azospirillaceae	OTU_688 (unc_Azospirillaceae)
OTU_723	Bacteria	Gemmatimonadetes	Gemmatimonadetes	Gemmatimonadales	Gemmatimonadaceae	unc_Gemmatimonadaceae	OTU_723 (unc_Gemmatimonadaceae)
OTU_8748	Bacteria	Actinobacteria	Thermoleophilia	Gaiellales	Gaiellaceae	Gaiella	OTU_8748 (unc_Gaiella)
OTU_1325	Bacteria	Acidobacteria	Acidobacteria_Gp6	Gp6	Gp6	Gp6	OTU_1325 (unc_Gp6)
OTU_606	Bacteria	Firmicutes	Bacilli	Bacillales	Thermoactinomycetaceae1	Laceyella	OTU_606 (unc_Laceyella)
OTU_7341	Bacteria	Proteobacteria	Gammaproteobacteria	Pseudomonadales	Pseudomonadaceae	Azotobacter	OTU_7341 (unc_Azotobacter)
OTU_1556	Bacteria	Actinobacteria	Thermoleophilia	Solirubrobacterales	unc_Solirubrobacterales	unc_Solirubrobacterales	OTU_1556 (unc_Solirubrobacterales)
OTU_1042	Bacteria	Bacteroidetes	Chitinophagia	Chitinophagales	Chitinophagaceae	unc_Chitinophagaceae	OTU_1042 (unc_Chitinophagaceae)
OTU_757	Bacteria	Acidobacteria	Acidobacteria_Gp25	Gp25	Gp25	Gp25	OTU_757 (unc_Gp25)
OTU_1365	Bacteria	unc_Bacteria	unc_Bacteria	unc_Bacteria	unc_Bacteria	unc_Bacteria	OTU_1365 (unc_Bacteria)
OTU_1089	Bacteria	Actinobacteria	Actinobacteria	Propionibacteriales	Nocardioidaceae	Nocardioides	OTU_1089 (unc_Nocardioides)
OTU_107	Bacteria	Actinobacteria	unc_Actinobacteria	unc_Actinobacteria	unc_Actinobacteria	unc_Actinobacteria	OTU_107 (unc_Actinobacteria)
OTU_6109	Bacteria	Chloroflexi	Anaerolineae	Anaerolineales	Anaerolineaceae	unc_Anaerolineaceae	OTU_6109 (unc_Anaerolineaceae)
OTU_1376	Bacteria	Proteobacteria	unc_Proteobacteria	unc_Proteobacteria	unc_Proteobacteria	unc_Proteobacteria	OTU_1376 (unc_Proteobacteria)
OTU_4848	Bacteria	Acidobacteria	unc_Acidobacteria	unc_Acidobacteria	unc_Acidobacteria	unc_Acidobacteria	OTU_4848 (unc_Acidobacteria)
OTU_1467	Bacteria	Gemmatimonadetes	Gemmatimonadetes	Gemmatimonadales	Gemmatimonadaceae	unc_Gemmatimonadaceae	OTU_1467 (unc_Gemmatimonadaceae)
OTU_1487	Bacteria	Proteobacteria	Alphaproteobacteria	Rhodospirillales	Acetobacteraceae	Roseomonas	OTU_1487 (unc_Roseomonas)
OTU_421	Bacteria	Actinobacteria	Acidimicrobiia	Acidimicrobiales	Iamiaceae	unc_Iamiaceae	OTU_421 (unc_Iamiaceae)
OTU_472	Bacteria	Actinobacteria	Actinobacteria	Propionibacteriales	Nocardioidaceae	Nocardioides	OTU_472 (unc_Nocardioides)
OTU_3809	Bacteria	Acidobacteria	Acidobacteria_Gp6	Gp6	Gp6	Gp6	OTU_3809 (unc_Gp6)
OTU_2425	Bacteria	Actinobacteria	Thermoleophilia	Gaiellales	Gaiellaceae	Gaiella	OTU_2425 (Gaiella_occulta)
OTU_1125	Bacteria	Actinobacteria	Actinobacteria	Pseudonocardiales	Pseudonocardiaceae	Pseudonocardia	OTU_1125 (unc_Pseudonocardia)
OTU_1011	Bacteria	Acidobacteria	Acidobacteria_Gp6	Gp6	Gp6	Gp6	OTU_1011 (unc_Gp6)
OTU_781	Bacteria	Actinobacteria	Actinobacteria	Micromonosporales	Micromonosporaceae	unc_Micromonosporaceae	OTU_781 (unc_Micromonosporaceae)
OTU_1836	Bacteria	Acidobacteria	Acidobacteria_Gp18	Gp18	Gp18	Gp18	OTU_1836 (unc_Gp18)
OTU_824	Bacteria	Proteobacteria	Deltaproteobacteria	Myxococcales	Polyangiaceae	Aetherobacter	OTU_824 (Aetherobacter_rufus)
OTU_1397	Bacteria	Proteobacteria	Alphaproteobacteria	Rhizobiales	Bradyrhizobiaceae	unc_Bradyrhizobiaceae	OTU_1397 (unc_Bradyrhizobiaceae)
OTU_3077	Bacteria	Planctomycetes	Planctomycetacia	Planctomycetales	Isosphaeraceae	unc_Isosphaeraceae	OTU_3077 (unc_Isosphaeraceae)
OTU_748	Bacteria	Verrucomicrobia	Spartobacteria	Spartobacteria_genera_incertae_sedis	Spartobacteria_genera_incertae_sedis	Spartobacteria_genera_incertae_sedis	OTU_748 (unc_Spartobacteria_genera_incertae_sedis)
OTU_653	Bacteria	Acidobacteria	Acidobacteria_Gp1	Gp1	Gp1	Gp1	OTU_653 (unc_Gp1)
OTU_294	Bacteria	Acidobacteria	Acidobacteria	unc_Acidobacteria	unc_Acidobacteria	unc_Acidobacteria	OTU_294 (unc_Acidobacteria)
OTU_8038	Bacteria	Proteobacteria	Alphaproteobacteria	Rhizobiales	unc_Rhizobiales	unc_Rhizobiales	OTU_8038 (unc_Rhizobiales)
OTU_2174	Bacteria	Acidobacteria	Acidobacteria_Gp4	Gp4	Gp4	Gp4	OTU_2174 (unc_Gp4)
OTU_1005	Bacteria	unc_Bacteria	unc_Bacteria	unc_Bacteria	unc_Bacteria	unc_Bacteria	OTU_1005 (unc_Bacteria)
OTU_821	Bacteria	Chloroflexi	unc_Chloroflexi	unc_Chloroflexi	unc_Chloroflexi	unc_Chloroflexi	OTU_821 (unc_Chloroflexi)
OTU_505	Bacteria	Proteobacteria	Alphaproteobacteria	Sphingomonadales	Sphingomonadaceae	Sphingobium	OTU_505 (unc_Sphingobium)
OTU_9475	Bacteria	Acidobacteria	Acidobacteria_Gp6	Gp6	Gp6	Gp6	OTU_9475 (unc_Gp6)
OTU_249	Bacteria	Actinobacteria	Acidimicrobiia	Acidimicrobiales	Iamiaceae	unc_Iamiaceae	OTU_249 (unc_Iamiaceae)
OTU_1453	Bacteria	Proteobacteria	Deltaproteobacteria	unc_Deltaproteobacteria	unc_Deltaproteobacteria	unc_Deltaproteobacteria	OTU_1453 (unc_Deltaproteobacteria)
OTU_1772	Bacteria	Chloroflexi	Caldilineae	Caldilineales	Caldilineaceae	unc_Caldilineaceae	OTU_1772 (unc_Caldilineaceae)
OTU_362	Bacteria	Acidobacteria	Acidobacteria_Gp3	Gp3	Gp3	Gp3	OTU_362 (unc_Gp3)
OTU_1035	Bacteria	unc_Bacteria	unc_Bacteria	unc_Bacteria	unc_Bacteria	unc_Bacteria	OTU_1035 (unc_Bacteria)
OTU_1536	Bacteria	Acidobacteria	Blastocatellia	Blastocatellales	Blastocatellaceae	Tellurimicrobium	OTU_1536 (unc_Tellurimicrobium)
OTU_762	Bacteria	Acidobacteria	Acidobacteria_Gp3	Gp3	Gp3	Gp3	OTU_762 (unc_Gp3)
OTU_4096	Bacteria	Acidobacteria	Acidobacteria_Gp6	Gp6	Gp6	Gp6	OTU_4096 (unc_Gp6)
OTU_692	Bacteria	Acidobacteria	Acidobacteria_Gp6	Gp6	Gp6	Gp6	OTU_692 (unc_Gp6)
OTU_7979	Bacteria	Actinobacteria	Thermoleophilia	Gaiellales	Gaiellaceae	Gaiella	OTU_7979 (unc_Gaiella)
OTU_1322	Bacteria	unc_Bacteria	unc_Bacteria	unc_Bacteria	unc_Bacteria	unc_Bacteria	OTU_1322 (unc_Bacteria)
OTU_718	Bacteria	Proteobacteria	Alphaproteobacteria	Rhodospirillales	Rhodospirillaceae	Dongia	OTU_718 (unc_Dongia)
OTU_2165	Bacteria	Proteobacteria	Deltaproteobacteria	unc_Deltaproteobacteria	unc_Deltaproteobacteria	unc_Deltaproteobacteria	OTU_2165 (unc_Deltaproteobacteria)
OTU_9894	Bacteria	Proteobacteria	Alphaproteobacteria	Rhizobiales	Hyphomicrobiaceae	unc_Hyphomicrobiaceae	OTU_9894 (unc_Hyphomicrobiaceae)
OTU_9040	Bacteria	Actinobacteria	Acidimicrobiia	Acidimicrobiales	unc_Acidimicrobiales	unc_Acidimicrobiales	OTU_9040 (unc_Acidimicrobiales)
OTU_6935	Bacteria	Actinobacteria	Acidimicrobiia	Acidimicrobiales	Iamiaceae	unc_Iamiaceae	OTU_6935 (unc_Iamiaceae)
OTU_988	Bacteria	Proteobacteria	Deltaproteobacteria	Myxococcales	Kofleriaceae	Kofleria	OTU_988 (unc_Kofleria)
OTU_299	Bacteria	Acidobacteria	unc_Acidobacteria	unc_Acidobacteria	unc_Acidobacteria	unc_Acidobacteria	OTU_299 (unc_Acidobacteria)
OTU_8972	Bacteria	Acidobacteria	Acidobacteria_Gp6	Gp6	Gp6	Gp6	OTU_8972 (unc_Gp6)
OTU_396	Bacteria	Actinobacteria	Actinobacteria	Pseudonocardiales	Pseudonocardiaceae	Amycolatopsis	OTU_396 (unc_Amycolatopsis)
OTU_7490	Bacteria	Actinobacteria	Actinobacteria	Pseudonocardiales	Pseudonocardiaceae	Pseudonocardia	OTU_7490 (unc_Pseudonocardia)
OTU_1072	Bacteria	Actinobacteria	Thermoleophilia	Solirubrobacterales	Baekduiaceae	Baekduia	OTU_1072 (unc_Baekduia)
OTU_2009	Bacteria	Bacteroidetes	Cytophagia	Cytophagales	Hymenobacteraceae	Pontibacter	OTU_2009 (unc_Pontibacter)
OTU_567	Bacteria	Gemmatimonadetes	Gemmatimonadetes	Gemmatimonadales	Gemmatimonadaceae	unc_Gemmatimonadaceae	OTU_567 (unc_Gemmatimonadaceae)
OTU_312	Bacteria	Firmicutes	Bacilli	Bacillales	Bacillaceae1	Bacillus	OTU_312 (Bacillus_kokeshiiformis)
OTU_825	Bacteria	Chloroflexi	unc_Chloroflexi	unc_Chloroflexi	unc_Chloroflexi	unc_Chloroflexi	OTU_825 (unc_Chloroflexi)
OTU_379	Bacteria	Proteobacteria	Alphaproteobacteria	Rhizobiales	unc_Rhizobiales	unc_Rhizobiales	OTU_379 (unc_Rhizobiales)
OTU_458	Bacteria	Chloroflexi	unc_Chloroflexi	unc_Chloroflexi	unc_Chloroflexi	unc_Chloroflexi	OTU_458 (unc_Chloroflexi)
OTU_3318	Bacteria	Acidobacteria	Blastocatellia	Blastocatellales	Blastocatellaceae	Aridibacter	OTU_3318 (unc_Aridibacter)
OTU_8685	Bacteria	Proteobacteria	Alphaproteobacteria	Rhizobiales	Methylobacteriaceae	unc_Methylobacteriaceae	OTU_8685 (unc_Methylobacteriaceae)
OTU_938	Bacteria	unc_Bacteria	unc_Bacteria	unc_Bacteria	unc_Bacteria	unc_Bacteria	OTU_938 (unc_Bacteria)
OTU_2290	Bacteria	Actinobacteria	Acidimicrobiia	Acidimicrobiales	unc_Acidimicrobiales	unc_Acidimicrobiales	OTU_2290 (unc_Acidimicrobiales)
OTU_1081	Bacteria	Actinobacteria	Acidimicrobiia	Acidimicrobiales	Iamiaceae	unc_Iamiaceae	OTU_1081 (unc_Iamiaceae)
OTU_525	Bacteria	Proteobacteria	Alphaproteobacteria	Rhizobiales	Xanthobacteraceae	Labrys	OTU_525 (unc_Labrys)
OTU_1113	Archaea	Thaumarchaeota	unc_Thaumarchaeota	Nitrososphaerales	Nitrososphaeraceae	Nitrososphaera	OTU_1113 (Nitrososphaera_viennensis)
OTU_8082	Bacteria	unc_Bacteria	unc_Bacteria	unc_Bacteria	unc_Bacteria	unc_Bacteria	OTU_8082 (unc_Bacteria)
OTU_7959	Bacteria	Chloroflexi	Thermomicrobia	Sphaerobacterales	Sphaerobacteraceae	unc_Sphaerobacteraceae	OTU_7959 (unc_Sphaerobacteraceae)
OTU_987	Bacteria	Actinobacteria	Thermoleophilia	unc_Thermoleophilia	unc_Thermoleophilia	unc_Thermoleophilia	OTU_987 (unc_Thermoleophilia)
OTU_1391	Bacteria	Firmicutes	Bacilli	Bacillales	Bacillaceae1	Aeribacillus	OTU_1391 (unc_Aeribacillus)
OTU_8167	Bacteria	Proteobacteria	Alphaproteobacteria	Sphingomonadales	Sphingomonadaceae	unc_Sphingomonadaceae	OTU_8167 (unc_Sphingomonadaceae)
OTU_1228	Bacteria	Actinobacteria	Thermoleophilia	Solirubrobacterales	unc_Solirubrobacterales	unc_Solirubrobacterales	OTU_1228 (unc_Solirubrobacterales)
OTU_1415	Bacteria	Acidobacteria	Acidobacteria_Gp3	Gp3	Gp3	Gp3	OTU_1415 (unc_Gp3)
OTU_1251	Bacteria	Proteobacteria	Deltaproteobacteria	Myxococcales	unc_Myxococcales	unc_Myxococcales	OTU_1251 (unc_Myxococcales)
OTU_1236	Bacteria	Proteobacteria	Alphaproteobacteria	Rhodospirillales	Reyranellaceae	Reyranella	OTU_1236 (Reyranella_terrae)
OTU_865	Bacteria	Proteobacteria	Gammaproteobacteria	Xanthomonadales	Rhodanobacteraceae	Dokdonella	OTU_865 (unc_Dokdonella)
OTU_1075	Bacteria	Proteobacteria	Deltaproteobacteria	Myxococcales	Polyangiaceae	unc_Polyangiaceae	OTU_1075 (unc_Polyangiaceae)
OTU_1804	Bacteria	Bacteroidetes	Chitinophagia	Chitinophagales	Chitinophagaceae	Flavisolibacter	OTU_1804 (unc_Flavisolibacter)
OTU_3937	Bacteria	Acidobacteria	Acidobacteria_Gp6	Gp6	Gp6	Gp6	OTU_3937 (unc_Gp6)
OTU_1367	Bacteria	Actinobacteria	Actinobacteria	unc_Actinobacteria	unc_Actinobacteria	unc_Actinobacteria	OTU_1367 (unc_Actinobacteria)
OTU_4130	Bacteria	unc_Bacteria	unc_Bacteria	unc_Bacteria	unc_Bacteria	unc_Bacteria	OTU_4130 (unc_Bacteria)
OTU_888	Bacteria	unc_Bacteria	unc_Bacteria	unc_Bacteria	unc_Bacteria	unc_Bacteria	OTU_888 (unc_Bacteria)
OTU_494	Bacteria	Proteobacteria	Alphaproteobacteria	Rhizobiales	unc_Rhizobiales	unc_Rhizobiales	OTU_494 (unc_Rhizobiales)
OTU_546	Bacteria	Actinobacteria	unc_Actinobacteria	unc_Actinobacteria	unc_Actinobacteria	unc_Actinobacteria	OTU_546 (unc_Actinobacteria)
OTU_2473	Bacteria	Acidobacteria	Acidobacteria_Gp17	Gp17	Gp17	Gp17	OTU_2473 (unc_Gp17)
OTU_2749	Bacteria	Actinobacteria	Thermoleophilia	Gaiellales	Gaiellaceae	Gaiella	OTU_2749 (unc_Gaiella)
OTU_1150	Bacteria	Acidobacteria	Acidobacteria_Gp16	Gp16	Gp16	Gp16	OTU_1150 (unc_Gp16)
OTU_2171	Bacteria	Proteobacteria	Alphaproteobacteria	Sphingomonadales	Erythrobacteraceae	unc_Erythrobacteraceae	OTU_2171 (unc_Erythrobacteraceae)
OTU_788	Bacteria	Chloroflexi	Thermomicrobia	Sphaerobacterales	Sphaerobacteraceae	unc_Sphaerobacteraceae	OTU_788 (unc_Sphaerobacteraceae)
OTU_1085	Bacteria	Actinobacteria	unc_Actinobacteria	unc_Actinobacteria	unc_Actinobacteria	unc_Actinobacteria	OTU_1085 (unc_Actinobacteria)
OTU_9144	Bacteria	Acidobacteria	Acidobacteria_Gp4	Gp4	Gp4	Gp4	OTU_9144 (unc_Gp4)
OTU_1801	Bacteria	unc_Bacteria	unc_Bacteria	unc_Bacteria	unc_Bacteria	unc_Bacteria	OTU_1801 (unc_Bacteria)
OTU_414	Bacteria	unc_Bacteria	unc_Bacteria	unc_Bacteria	unc_Bacteria	unc_Bacteria	OTU_414 (unc_Bacteria)
OTU_1635	Bacteria	unc_Bacteria	unc_Bacteria	unc_Bacteria	unc_Bacteria	unc_Bacteria	OTU_1635 (unc_Bacteria)
OTU_1049	Bacteria	Acidobacteria	unc_Acidobacteria	unc_Acidobacteria	unc_Acidobacteria	unc_Acidobacteria	OTU_1049 (unc_Acidobacteria)
OTU_7832	Bacteria	Firmicutes	Bacilli	Bacillales	Planococcaceae	Sporosarcina	OTU_7832 (unc_Sporosarcina)
OTU_832	Bacteria	Gemmatimonadetes	Gemmatimonadetes	Gemmatimonadales	Gemmatimonadaceae	unc_Gemmatimonadaceae	OTU_832 (unc_Gemmatimonadaceae)
OTU_851	Bacteria	Acidobacteria	Acidobacteria_Gp25	Gp25	Gp25	Gp25	OTU_851 (unc_Gp25)
OTU_1966	Bacteria	Acidobacteria	unc_Acidobacteria	unc_Acidobacteria	unc_Acidobacteria	unc_Acidobacteria	OTU_1966 (unc_Acidobacteria)
OTU_9761	Bacteria	Acidobacteria	Acidobacteria_Gp6	Gp6	Gp6	Gp6	OTU_9761 (unc_Gp6)
OTU_964	Bacteria	Actinobacteria	Thermoleophilia	Solirubrobacterales	unc_Solirubrobacterales	unc_Solirubrobacterales	OTU_964 (unc_Solirubrobacterales)
OTU_954	Bacteria	Gemmatimonadetes	Gemmatimonadetes	Gemmatimonadales	Gemmatimonadaceae	unc_Gemmatimonadaceae	OTU_954 (unc_Gemmatimonadaceae)
OTU_2624	Bacteria	Firmicutes	Bacilli	Bacillales	Paenibacillaceae1	Paenibacillus	OTU_2624 (unc_Paenibacillus)
OTU_523	Bacteria	Proteobacteria	Alphaproteobacteria	Rhizobiales	unc_Rhizobiales	unc_Rhizobiales	OTU_523 (unc_Rhizobiales)
OTU_3194	Bacteria	Acidobacteria	Acidobacteria	unc_Acidobacteria	unc_Acidobacteria	Gp6	OTU_3194 (unc_Gp6)
OTU_990	Bacteria	unc_Bacteria	unc_Bacteria	unc_Bacteria	unc_Bacteria	unc_Bacteria	OTU_990 (unc_Bacteria)
OTU_7946	Bacteria	Chloroflexi	Chloroflexia	unc_Chloroflexia	unc_Chloroflexia	unc_Chloroflexia	OTU_7946 (unc_Chloroflexia)
OTU_976	Bacteria	unc_Bacteria	unc_Bacteria	unc_Bacteria	unc_Bacteria	unc_Bacteria	OTU_976 (unc_Bacteria)
OTU_2865	Bacteria	Proteobacteria	Betaproteobacteria	unc_Betaproteobacteria	unc_Betaproteobacteria	unc_Betaproteobacteria	OTU_2865 (unc_Betaproteobacteria)
OTU_2899	Bacteria	Gemmatimonadetes	Gemmatimonadetes	Gemmatimonadales	Gemmatimonadaceae	unc_Gemmatimonadaceae	OTU_2899 (unc_Gemmatimonadaceae)
OTU_962	Bacteria	Bacteroidetes	Chitinophagia	Chitinophagales	Chitinophagaceae	unc_Chitinophagaceae	OTU_962 (unc_Chitinophagaceae)
OTU_1347	Bacteria	Actinobacteria	Acidimicrobiia	Acidimicrobiales	Iamiaceae	Actinomarinicola	OTU_1347 (unc_Actinomarinicola)
OTU_230	Bacteria	Actinobacteria	Thermoleophilia	Solirubrobacterales	Baekduiaceae	Baekduia	OTU_230 (unc_Baekduia)
OTU_717	Bacteria	Bacteroidetes	Sphingobacteriia	Sphingobacteriales	Sphingobacteriaceae	Daejeonella	OTU_717 (unc_Daejeonella)
OTU_301	Bacteria	Chloroflexi	unc_Chloroflexi	unc_Chloroflexi	unc_Chloroflexi	unc_Chloroflexi	OTU_301 (unc_Chloroflexi)
OTU_1055	Bacteria	Proteobacteria	Gammaproteobacteria	Gammaproteobacteria_incertae	unc_Gammaproteobacteria_incertae	Acidibacter	OTU_1055 (Acidibacter_ferrireducens)
OTU_1989	Bacteria	Proteobacteria	Gammaproteobacteria	Xanthomonadales	Xanthomonadaceae	Thermomonas	OTU_1989 (Thermomonas_carbonis)
OTU_1654	Bacteria	Acidobacteria	Acidobacteria_Gp6	Gp6	Gp6	Gp6	OTU_1654 (unc_Gp6)
OTU_797	Bacteria	Proteobacteria	Alphaproteobacteria	Rhodospirillales	unc_Rhodospirillales	unc_Rhodospirillales	OTU_797 (unc_Rhodospirillales)
OTU_1370	Bacteria	Proteobacteria	Alphaproteobacteria	Rhizobiales	unc_Rhizobiales	unc_Rhizobiales	OTU_1370 (unc_Rhizobiales)
OTU_803	Bacteria	Proteobacteria	Gammaproteobacteria	Legionellales	Coxiellaceae	Aquicella	OTU_803 (Aquicella_siphonis)
OTU_996	Bacteria	Acidobacteria	Blastocatellia	Blastocatellales	Blastocatellaceae	Stenotrophobacter	OTU_996 (unc_Stenotrophobacter)
OTU_1458	Bacteria	Acidobacteria	Blastocatellia	Blastocatellales	Blastocatellaceae	unc_Blastocatellaceae	OTU_1458 (unc_Blastocatellaceae)
OTU_4884	Bacteria	Acidobacteria	Acidobacteria_Gp4	Gp4	Gp4	Gp4	OTU_4884 (unc_Gp4)
OTU_2949	Bacteria	Proteobacteria	Alphaproteobacteria	Rhodospirillales	Acetobacteraceae	unc_Acetobacteraceae	OTU_2949 (unc_Acetobacteraceae)
OTU_754	Bacteria	unc_Bacteria	unc_Bacteria	unc_Bacteria	unc_Bacteria	unc_Bacteria	OTU_754 (unc_Bacteria)
OTU_2147	Bacteria	Acidobacteria	Acidobacteria_Gp6	Gp6	Gp6	Gp6	OTU_2147 (unc_Gp6)
OTU_809	Bacteria	Gemmatimonadetes	Gemmatimonadetes	Gemmatimonadales	Gemmatimonadaceae	unc_Gemmatimonadaceae	OTU_809 (unc_Gemmatimonadaceae)
OTU_1763	Bacteria	Proteobacteria	Deltaproteobacteria	Myxococcales	unc_Myxococcales	unc_Myxococcales	OTU_1763 (unc_Myxococcales)
OTU_700	Bacteria	unc_Bacteria	unc_Bacteria	unc_Bacteria	unc_Bacteria	unc_Bacteria	OTU_700 (unc_Bacteria)
OTU_2091	Bacteria	Acidobacteria	Acidobacteria_Gp7	Gp7	Gp7	Gp7	OTU_2091 (unc_Gp7)
OTU_682	Bacteria	Proteobacteria	Gammaproteobacteria	Xanthomonadales	Xanthomonadaceae	Arenimonas	OTU_682 (unc_Arenimonas)
OTU_1740	Bacteria	Acidobacteria	Acidobacteria_Gp22	Gp22	Gp22	Gp22	OTU_1740 (unc_Gp22)
OTU_782	Bacteria	Acidobacteria	Acidobacteria_Gp4	Gp4	Gp4	Gp4	OTU_782 (unc_Gp4)
OTU_898	Bacteria	Actinobacteria	Actinobacteria	Pseudonocardiales	Pseudonocardiaceae	Pseudonocardia	OTU_898 (Pseudonocardia_hispaniensis)
OTU_945	Bacteria	Chloroflexi	Thermomicrobia	Sphaerobacterales	Sphaerobacteraceae	unc_Sphaerobacteraceae	OTU_945 (unc_Sphaerobacteraceae)
OTU_616	Bacteria	Firmicutes	Bacilli	Bacillales	Paenibacillaceae1	Paenibacillus	OTU_616 (unc_Paenibacillus)
OTU_863	Bacteria	Acidobacteria	Acidobacteria_Gp6	Gp6	Gp6	Gp6	OTU_863 (unc_Gp6)
OTU_991	Bacteria	Firmicutes	Bacilli	Bacillales	Thermoactinomycetaceae1	unc_Thermoactinomycetaceae1	OTU_991 (unc_Thermoactinomycetaceae1)
OTU_763	Bacteria	Actinobacteria	Thermoleophilia	Solirubrobacterales	unc_Solirubrobacterales	unc_Solirubrobacterales	OTU_763 (unc_Solirubrobacterales)
OTU_777	Bacteria	Chloroflexi	Caldilineae	Caldilineales	Caldilineaceae	Litorilinea	OTU_777 (unc_Litorilinea)
OTU_1303	Bacteria	Actinobacteria	unc_Actinobacteria	unc_Actinobacteria	unc_Actinobacteria	unc_Actinobacteria	OTU_1303 (unc_Actinobacteria)
OTU_403	Bacteria	Actinobacteria	Actinobacteria	Kineosporiales	Kineosporiaceae	Angustibacter	OTU_403 (unc_Angustibacter)
OTU_6860	Bacteria	Firmicutes	Bacilli	Bacillales	Planococcaceae	Lysinibacillus	OTU_6860 (unc_Lysinibacillus)
OTU_579	Bacteria	Firmicutes	Bacilli	Bacillales	Paenibacillaceae2	Ammoniphilus	OTU_579 (unc_Ammoniphilus)
OTU_4858	Bacteria	Acidobacteria	Acidobacteria_Gp6	Gp6	Gp6	Gp6	OTU_4858 (unc_Gp6)
OTU_1581	Bacteria	Proteobacteria	Deltaproteobacteria	Myxococcales	unc_Myxococcales	unc_Myxococcales	OTU_1581 (unc_Myxococcales)
OTU_646	Bacteria	candidate division WPS-1	WPS-1_genera_incertae_sedis	WPS-1_genera_incertae_sedis	WPS-1_genera_incertae_sedis	WPS-1_genera_incertae_sedis	OTU_646 (unc_WPS-1_genera_incertae_sedis)
OTU_2436	Bacteria	Proteobacteria	Betaproteobacteria	unc_Betaproteobacteria	unc_Betaproteobacteria	unc_Betaproteobacteria	OTU_2436 (unc_Betaproteobacteria)
OTU_1248	Bacteria	Acidobacteria	Acidobacteria_Gp7	Gp7	Gp7	Gp7	OTU_1248 (unc_Gp7)
OTU_2903	Bacteria	Acidobacteria	Acidobacteria_Gp6	Gp6	Gp6	Gp6	OTU_2903 (unc_Gp6)
OTU_1882	Bacteria	Gemmatimonadetes	Gemmatimonadetes	Gemmatimonadales	Gemmatimonadaceae	unc_Gemmatimonadaceae	OTU_1882 (unc_Gemmatimonadaceae)
OTU_3066	Bacteria	Actinobacteria	Actinobacteria	Propionibacteriales	Nocardioidaceae	Nocardioides	OTU_3066 (unc_Nocardioides)
OTU_779	Bacteria	unc_Bacteria	unc_Bacteria	unc_Bacteria	unc_Bacteria	unc_Bacteria	OTU_779 (unc_Bacteria)
OTU_4413	Bacteria	Actinobacteria	Actinobacteria	unc_Actinobacteria	unc_Actinobacteria	unc_Actinobacteria	OTU_4413 (unc_Actinobacteria)
OTU_815	Bacteria	Acidobacteria	Acidobacteria_Gp3	Gp3	Gp3	Gp3	OTU_815 (unc_Gp3)
OTU_913	Bacteria	Actinobacteria	Actinobacteria	Micromonosporales	Micromonosporaceae	Rhizocola	OTU_913 (Rhizocola_hellebori)
OTU_1693	Bacteria	Chloroflexi	Chloroflexia	Kallotenuales	Kallotenuaceae	Kallotenue	OTU_1693 (unc_Kallotenue)
OTU_1985	Bacteria	Bacteroidetes	Chitinophagia	Chitinophagales	Chitinophagaceae	unc_Chitinophagaceae	OTU_1985 (unc_Chitinophagaceae)
OTU_1407	Bacteria	Proteobacteria	Gammaproteobacteria	Nevskiales	Steroidobacteraceae	Steroidobacter	OTU_1407 (unc_Steroidobacter)
OTU_778	Bacteria	Gemmatimonadetes	Gemmatimonadetes	Gemmatimonadales	Gemmatimonadaceae	Gemmatimonas	OTU_778 (unc_Gemmatimonas)
OTU_1108	Bacteria	Proteobacteria	Alphaproteobacteria	Rhizobiales	unc_Rhizobiales	unc_Rhizobiales	OTU_1108 (unc_Rhizobiales)
OTU_2643	Bacteria	Proteobacteria	Alphaproteobacteria	Rhodobacterales	Rhodobacteraceae	Rubellimicrobium	OTU_2643 (unc_Rubellimicrobium)
OTU_2729	Bacteria	Proteobacteria	Gammaproteobacteria	Gammaproteobacteria_incertae	unc_Gammaproteobacteria_incertae	Acidibacter	OTU_2729 (Acidibacter_ferrireducens)
OTU_1317	Bacteria	Proteobacteria	Alphaproteobacteria	Rhizobiales	Devosiaceae	Devosia	OTU_1317 (unc_Devosia)
OTU_571	Bacteria	Firmicutes	Bacilli	Bacillales	Bacillaceae 1	Bacillus	OTU_571 (unc_Bacillus)
OTU_3635	Bacteria	Acidobacteria	Acidobacteria_Gp6	Gp6	Gp6	Gp6	OTU_3635 (unc_Gp6)
OTU_758	Bacteria	Armatimonadetes	Chthonomonadetes	Chthonomonadales	Chthonomonadaceae	Chthonomonas/Armatimonadetes_gp3	OTU_758 (unc_Chthonomonas/Armatimonadetes_gp3)
OTU_1290	Bacteria	Proteobacteria	Deltaproteobacteria	Myxococcales	Labilitrichaceae	Labilithrix	OTU_1290 (unc_Labilithrix)
OTU_1313	Bacteria	Chloroflexi	Thermomicrobia	Sphaerobacterales	Sphaerobacteraceae	unc_Sphaerobacteraceae	OTU_1313 (unc_Sphaerobacteraceae)
OTU_387	Bacteria	unc_Bacteria	unc_Bacteria	unc_Bacteria	unc_Bacteria	unc_Bacteria	OTU_387 (unc_Bacteria)
OTU_1679	Bacteria	Acidobacteria	Acidobacteria_Gp17	Gp17	Gp17	Gp17	OTU_1679 (unc_Gp17)
OTU_334	Bacteria	Actinobacteria	Actinobacteria	unc_Actinobacteria	unc_Actinobacteria	unc_Actinobacteria	OTU_334 (unc_Actinobacteria)
OTU_6210	Bacteria	Proteobacteria	Deltaproteobacteria	Myxococcales	unc_Myxococcales	unc_Myxococcales	OTU_6210 (unc_Myxococcales)
OTU_1302	Bacteria	Actinobacteria	Acidimicrobiia	Acidimicrobiales	Iamiaceae	unc_Iamiaceae	OTU_1302 (unc_Iamiaceae)
OTU_870	Bacteria	Proteobacteria	Betaproteobacteria	unc_Betaproteobacteria	unc_Betaproteobacteria	unc_Betaproteobacteria	OTU_870 (unc_Betaproteobacteria)
OTU_1023	Bacteria	Proteobacteria	Alphaproteobacteria	Rhodospirillales	Geminicoccaceae	unc_Geminicoccaceae	OTU_1023 (unc_Geminicoccaceae)
OTU_2067	Bacteria	Acidobacteria	Acidobacteria_Gp10	Gp10	Gp10	Gp10	OTU_2067 (unc_Gp10)
OTU_10072	Bacteria	Proteobacteria	unc_Proteobacteria	unc_Proteobacteria	unc_Proteobacteria	unc_Proteobacteria	OTU_10072 (unc_Proteobacteria)
OTU_855	Bacteria	Candidatus Saccharibacteria	Saccharibacteria_genera_incertae_sedis	Saccharibacteria_genera_incertae_sedis	Saccharibacteria_genera_incertae_sedis	Saccharibacteria_genera_incertae_sedis	OTU_855 (unc_Saccharibacteria_genera_incertae_sedis)
OTU_2210	Bacteria	unc_Bacteria	unc_Bacteria	unc_Bacteria	unc_Bacteria	unc_Bacteria	OTU_2210 (unc_Bacteria)
OTU_841	Bacteria	unc_Bacteria	unc_Bacteria	unc_Bacteria	unc_Bacteria	unc_Bacteria	OTU_841 (unc_Bacteria)
OTU_1048	Bacteria	Acidobacteria	Acidobacteria_Gp25	Gp25	Gp25	Gp25	OTU_1048 (unc_Gp25)
OTU_1700	Bacteria	Actinobacteria	Thermoleophilia	Solirubrobacterales	unc_Solirubrobacterales	unc_Solirubrobacterales	OTU_1700 (unc_Solirubrobacterales)
OTU_6745	Bacteria	Firmicutes	Bacilli	Bacillales	Bacillaceae1	unc_Bacillaceae1	OTU_6745 (unc_Bacillaceae1)
OTU_2496	Bacteria	Proteobacteria	Betaproteobacteria	unc_Betaproteobacteria	unc_Betaproteobacteria	unc_Betaproteobacteria	OTU_2496 (unc_Betaproteobacteria)
OTU_4186	Bacteria	Proteobacteria	Alphaproteobacteria	Rhizobiales	unc_Rhizobiales	unc_Rhizobiales	OTU_4186 (unc_Rhizobiales)
OTU_377	Bacteria	Actinobacteria	unc_Actinobacteria	unc_Actinobacteria	unc_Actinobacteria	unc_Actinobacteria	OTU_377 (unc_Actinobacteria)
OTU_1110	Bacteria	Chloroflexi	Caldilineae	Caldilineales	Caldilineaceae	unc_Caldilineaceae	OTU_1110 (unc_Caldilineaceae)
OTU_1320	Bacteria	Verrucomicrobia	Spartobacteria	Spartobacteria_genera_incertae_sedis	Spartobacteria_genera_incertae_sedis	Spartobacteria_genera_incertae_sedis	OTU_1320 (unc_Spartobacteria_genera_incertae_sedis)
OTU_2690	Bacteria	Actinobacteria	Actinobacteria	Micromonosporales	Micromonosporaceae	unc_Micromonosporaceae	OTU_2690 (unc_Micromonosporaceae)
OTU_1597	Bacteria	Acidobacteria	Acidobacteria_Gp25	Gp25	Gp25	Gp25	OTU_1597 (unc_Gp25)
OTU_1718	Bacteria	Firmicutes	Bacilli	Bacillales	Paenibacillaceae1	Paenibacillus	OTU_1718 (Paenibacillus_lactis)
OTU_4852	Bacteria	Proteobacteria	Betaproteobacteria	Burkholderiales	Comamonadaceae	unc_Comamonadaceae	OTU_4852 (unc_Comamonadaceae)
OTU_4355	Bacteria	unc_Bacteria	unc_Bacteria	unc_Bacteria	unc_Bacteria	unc_Bacteria	OTU_4355 (unc_Bacteria)
OTU_750	Bacteria	Chloroflexi	Anaerolineae	unc_Anaerolineae	unc_Anaerolineae	unc_Anaerolineae	OTU_750 (unc_Anaerolineae)
OTU_1948	Bacteria	Firmicutes	Bacilli	Bacillales	Paenibacillaceae1	Paenibacillus	OTU_1948 (unc_Paenibacillus)
OTU_2094	Bacteria	Acidobacteria	Acidobacteria	unc_Acidobacteria	unc_Acidobacteria	Gp4	OTU_2094 (unc_Gp4)
OTU_1204	Bacteria	Verrucomicrobia	Subdivision3	Subdivision3_genera_incertae_sedis	Subdivision3_genera_incertae_sedis	Subdivision3_genera_incertae_sedis	OTU_1204 (unc_Subdivision3_genera_incertae_sedis)
OTU_1904	Bacteria	Actinobacteria	Actinobacteria	Micromonosporales	Micromonosporaceae	Actinoplanes	OTU_1904 (unc_Actinoplanes)
OTU_2115	Bacteria	Firmicutes	Bacilli	Bacillales	Paenibacillaceae1	Brevibacillus	OTU_2115 (Brevibacillus_sediminis)
OTU_3169	Bacteria	Acidobacteria	Acidobacteria_Gp17	Gp17	Gp17	Gp17	OTU_3169 (unc_Gp17)
OTU_2790	Bacteria	Latescibacteria	Latescibacteria_genera_incertae_sedis	Latescibacteria_genera_incertae_sedis	Latescibacteria_genera_incertae_sedis	Latescibacteria_genera_incertae_sedis	OTU_2790 (unc_Latescibacteria_genera_incertae_sedis)
OTU_1266	Bacteria	unc_Bacteria	unc_Bacteria	unc_Bacteria	unc_Bacteria	unc_Bacteria	OTU_1266 (unc_Bacteria)
OTU_2172	Bacteria	BRC1	unc_BRC1	unc_BRC1	unc_BRC1	unc_BRC1	OTU_2172 (unc_BRC1)
OTU_1513	Bacteria	unc_Bacteria	unc_Bacteria	unc_Bacteria	unc_Bacteria	unc_Bacteria	OTU_1513 (unc_Bacteria)
OTU_480	Bacteria	Proteobacteria	Alphaproteobacteria	Rhizobiales	unc_Rhizobiales	unc_Rhizobiales	OTU_480 (unc_Rhizobiales)
OTU_1199	Bacteria	unc_Bacteria	unc_Bacteria	unc_Bacteria	unc_Bacteria	unc_Bacteria	OTU_1199 (unc_Bacteria)
OTU_1146	Bacteria	Bacteroidetes	Chitinophagia	Chitinophagales	Chitinophagaceae	Flavisolibacter	OTU_1146 (unc_Flavisolibacter)
OTU_1232	Bacteria	Chloroflexi	Thermomicrobia	Sphaerobacterales	Sphaerobacteraceae	unc_Sphaerobacteraceae	OTU_1232 (unc_Sphaerobacteraceae)
OTU_1753	Bacteria	Chloroflexi	Chloroflexia	Chloroflexales	unc_Chloroflexales	unc_Chloroflexales	OTU_1753 (unc_Chloroflexales)
OTU_1618	Bacteria	Actinobacteria	Thermoleophilia	Gaiellales	Gaiellaceae	Gaiella	OTU_1618 (unc_Gaiella)
OTU_2979	Bacteria	Proteobacteria	Deltaproteobacteria	Myxococcales	unc_Myxococcales	unc_Myxococcales	OTU_2979 (unc_Myxococcales)
OTU_2041	Bacteria	Firmicutes	unc_Firmicutes	unc_Firmicutes	unc_Firmicutes	unc_Firmicutes	OTU_2041 (unc_Firmicutes)
OTU_1104	Bacteria	unc_Bacteria	unc_Bacteria	unc_Bacteria	unc_Bacteria	unc_Bacteria	OTU_1104 (unc_Bacteria)
OTU_951	Bacteria	Proteobacteria	Deltaproteobacteria	Myxococcales	Anaeromyxobacteraceae	Anaeromyxobacter	OTU_951 (unc_Anaeromyxobacter)
OTU_1093	Bacteria	Proteobacteria	Deltaproteobacteria	Myxococcales	Polyangiaceae	unc_Polyangiaceae	OTU_1093 (unc_Polyangiaceae)
OTU_1394	Bacteria	Planctomycetes	Planctomycetacia	Planctomycetales	Isosphaeraceae	unc_Isosphaeraceae	OTU_1394 (unc_Isosphaeraceae)
OTU_1959	Bacteria	unc_Bacteria	unc_Bacteria	unc_Bacteria	unc_Bacteria	unc_Bacteria	OTU_1959 (unc_Bacteria)
OTU_1488	Bacteria	Acidobacteria	Acidobacteria_Gp25	Gp25	Gp25	Gp25	OTU_1488 (unc_Gp25)
OTU_1173	Bacteria	Bacteroidetes	Chitinophagia	Chitinophagales	Chitinophagaceae	unc_Chitinophagaceae	OTU_1173 (unc_Chitinophagaceae)
OTU_2059	Bacteria	Actinobacteria	Thermoleophilia	Solirubrobacterales	unc_Solirubrobacterales	unc_Solirubrobacterales	OTU_2059 (unc_Solirubrobacterales)
OTU_2877	Bacteria	Actinobacteria	Actinobacteria	Micromonosporales	Micromonosporaceae	unc_Micromonosporaceae	OTU_2877 (unc_Micromonosporaceae)
OTU_1239	Bacteria	Actinobacteria	Acidimicrobiia	Acidimicrobiales	Iamiaceae	unc_Iamiaceae	OTU_1239 (unc_Iamiaceae)
OTU_2580	Bacteria	Verrucomicrobia	Subdivision3	Subdivision3_genera_incertae_sedis	Subdivision3_genera_incertae_sedis	Subdivision3_genera_incertae_sedis	OTU_2580 (unc_Subdivision3_genera_incertae_sedis)
OTU_1565	Bacteria	Verrucomicrobia	Subdivision3	Subdivision3_genera_incertae_sedis	Subdivision3_genera_incertae_sedis	Subdivision3_genera_incertae_sedis	OTU_1565 (unc_Subdivision3_genera_incertae_sedis)
OTU_708	Bacteria	Proteobacteria	Alphaproteobacteria	Rhodospirillales	Geminicoccaceae	Arboricoccus	OTU_708 (unc_Arboricoccus)
OTU_7663	Bacteria	Proteobacteria	Betaproteobacteria	unc_Betaproteobacteria	unc_Betaproteobacteria	unc_Betaproteobacteria	OTU_7663 (unc_Betaproteobacteria)
OTU_1432	Bacteria	Actinobacteria	Thermoleophilia	Gaiellales	Gaiellaceae	Gaiella	OTU_1432 (unc_Gaiella)
OTU_1413	Bacteria	Proteobacteria	Gammaproteobacteria	unc_Gammaproteobacteria	unc_Gammaproteobacteria	unc_Gammaproteobacteria	OTU_1413 (unc_Gammaproteobacteria)
OTU_1259	Bacteria	unc_Bacteria	unc_Bacteria	unc_Bacteria	unc_Bacteria	unc_Bacteria	OTU_1259 (unc_Bacteria)
OTU_524	Bacteria	Proteobacteria	Alphaproteobacteria	Rhodospirillales	Geminicoccaceae	unc_Geminicoccaceae	OTU_524 (unc_Geminicoccaceae)
OTU_1371	Bacteria	unc_Bacteria	unc_Bacteria	unc_Bacteria	unc_Bacteria	unc_Bacteria	OTU_1371 (unc_Bacteria)
OTU_4190	Bacteria	Firmicutes	Bacilli	Bacillales	Paenibacillaceae1	Fontibacillus	OTU_4190 (Fontibacillus_aquaticus)
OTU_6234	Bacteria	Actinobacteria	Actinobacteria	Micromonosporales	Micromonosporaceae	unc_Micromonosporaceae	OTU_6234 (unc_Micromonosporaceae)
OTU_738	Bacteria	Actinobacteria	Actinobacteria	Propionibacteriales	Actinopolymorphaceae	Actinopolymorpha	OTU_738 (unc_Actinopolymorpha)
OTU_1217	Bacteria	Acidobacteria	Acidobacteria_Gp6	Gp6	Gp6	Gp6	OTU_1217 (unc_Gp6)
OTU_1193	Bacteria	Firmicutes	Clostridia	unc_Clostridia	unc_Clostridia	unc_Clostridia	OTU_1193 (unc_Clostridia)
OTU_1020	Bacteria	Chloroflexi	Thermomicrobia	unc_Thermomicrobia	unc_Thermomicrobia	unc_Thermomicrobia	OTU_1020 (unc_Thermomicrobia)
OTU_5560	Bacteria	Proteobacteria	Betaproteobacteria	unc_Betaproteobacteria	unc_Betaproteobacteria	unc_Betaproteobacteria	OTU_5560 (unc_Betaproteobacteria)
OTU_2444	Bacteria	Acidobacteria	Acidobacteria_Gp5	Gp5	Gp5	Gp5	OTU_2444 (unc_Gp5)
OTU_1598	Bacteria	Chloroflexi	Anaerolineae	unc_Anaerolineae	unc_Anaerolineae	unc_Anaerolineae	OTU_1598 (unc_Anaerolineae)
OTU_1594	Bacteria	Bacteroidetes	Cytophagia	Cytophagales	Hymenobacteraceae	Adhaeribacter	OTU_1594 (unc_Adhaeribacter)
OTU_1902	Bacteria	Acidobacteria	Acidobacteria_Gp6	Gp6	Gp6	Gp6	OTU_1902 (unc_Gp6)
OTU_1186	Bacteria	Proteobacteria	Alphaproteobacteria	Sphingomonadales	Erythrobacteraceae	Novosphingobium	OTU_1186 (unc_Novosphingobium)
OTU_739	Bacteria	unc_Bacteria	unc_Bacteria	unc_Bacteria	unc_Bacteria	unc_Bacteria	OTU_739 (unc_Bacteria)
OTU_1805	Bacteria	Actinobacteria	Thermoleophilia	Solirubrobacterales	Parviterribacteraceae	Parviterribacter	OTU_1805 (Parviterribacter_multiflagellatus)
OTU_5988	Bacteria	Proteobacteria	Alphaproteobacteria	Sphingomonadales	Erythrobacteraceae	unc_Erythrobacteraceae	OTU_5988 (unc_Erythrobacteraceae)
OTU_4262	Bacteria	Acidobacteria	Acidobacteria_Gp16	Gp16	Gp16	Gp16	OTU_4262 (unc_Gp16)
OTU_1821	Bacteria	unc_Bacteria	unc_Bacteria	unc_Bacteria	unc_Bacteria	unc_Bacteria	OTU_1821 (unc_Bacteria)
OTU_654	Bacteria	unc_Bacteria	unc_Bacteria	unc_Bacteria	unc_Bacteria	unc_Bacteria	OTU_654 (unc_Bacteria)
OTU_2089	Bacteria	Verrucomicrobia	Opitutae	Opitutales	Opitutaceae	unc_Opitutaceae	OTU_2089 (unc_Opitutaceae)
OTU_3604	Bacteria	Actinobacteria	Thermoleophilia	Solirubrobacterales	unc_Solirubrobacterales	unc_Solirubrobacterales	OTU_3604 (unc_Solirubrobacterales)
OTU_3158	Bacteria	Proteobacteria	Betaproteobacteria	Burkholderiales	Comamonadaceae	unc_Comamonadaceae	OTU_3158 (unc_Comamonadaceae)
OTU_95	Bacteria	Actinobacteria	Actinobacteria	Propionibacteriales	Nocardioidaceae	Nocardioides	OTU_95 (unc_Nocardioides)
OTU_1181	Bacteria	Nitrospirae	Nitrospira	Nitrospirales	Nitrospiraceae	Nitrospira	OTU_1181 (unc_Nitrospira)
OTU_461	Bacteria	Actinobacteria	Actinobacteria	unc_Actinobacteria	unc_Actinobacteria	unc_Actinobacteria	OTU_461 (unc_Actinobacteria)
OTU_856	Bacteria	unc_Bacteria	unc_Bacteria	unc_Bacteria	unc_Bacteria	unc_Bacteria	OTU_856 (unc_Bacteria)
OTU_2057	Bacteria	Chloroflexi	Anaerolineae	Aggregatilineales	Aggregatilineaceae	Aggregatilinea	OTU_2057 (unc_Aggregatilinea)
OTU_1389	Bacteria	Proteobacteria	unc_Proteobacteria	unc_Proteobacteria	unc_Proteobacteria	unc_Proteobacteria	OTU_1389 (unc_Proteobacteria)
OTU_2164	Bacteria	Acidobacteria	Acidobacteria_Gp7	Gp7	Gp7	Gp7	OTU_2164 (unc_Gp7)
OTU_183	Bacteria	Actinobacteria	Thermoleophilia	Solirubrobacterales	unc_Solirubrobacterales	unc_Solirubrobacterales	OTU_183 (unc_Solirubrobacterales)
OTU_2499	Bacteria	Actinobacteria	Actinobacteria	Propionibacteriales	Nocardioidaceae	Nocardioides	OTU_2499 (unc_Nocardioides)
OTU_8949	Bacteria	unc_Bacteria	unc_Bacteria	unc_Bacteria	unc_Bacteria	unc_Bacteria	OTU_8949 (unc_Bacteria)
OTU_1525	Bacteria	Acidobacteria	Acidobacteria_Gp17	Gp17	Gp17	Gp17	OTU_1525 (unc_Gp17)
OTU_517	Bacteria	Proteobacteria	Alphaproteobacteria	Rhizobiales	Boseaceae	Bosea	OTU_517 (unc_Bosea)
OTU_3382	Bacteria	Actinobacteria	Actinobacteria	Pseudonocardiales	Pseudonocardiaceae	unc_Pseudonocardiaceae	OTU_3382 (unc_Pseudonocardiaceae)
OTU_1249	Bacteria	unc_Bacteria	unc_Bacteria	unc_Bacteria	unc_Bacteria	unc_Bacteria	OTU_1249 (unc_Bacteria)
OTU_2106	Bacteria	Bacteroidetes	Chitinophagia	Chitinophagales	Chitinophagaceae	unc_Chitinophagaceae	OTU_2106 (unc_Chitinophagaceae)
OTU_5142	Bacteria	Acidobacteria	Acidobacteria_Gp6	Gp6	Gp6	Gp6	OTU_5142 (unc_Gp6)
OTU_2084	Bacteria	Acidobacteria	Acidobacteria_Gp6	Gp6	Gp6	Gp6	OTU_2084 (unc_Gp6)
OTU_838	Bacteria	Proteobacteria	unc_Proteobacteria	unc_Proteobacteria	unc_Proteobacteria	unc_Proteobacteria	OTU_838 (unc_Proteobacteria)
OTU_6404	Bacteria	Proteobacteria	Deltaproteobacteria	Myxococcales	unc_Myxococcales	unc_Myxococcales	OTU_6404 (unc_Myxococcales)
OTU_1704	Bacteria	unc_Bacteria	unc_Bacteria	unc_Bacteria	unc_Bacteria	unc_Bacteria	OTU_1704 (unc_Bacteria)
OTU_7290	Bacteria	Bacteroidetes	Cytophagia	Cytophagales	Fulvivirgaceae	Chryseolinea	OTU_7290 (unc_Chryseolinea)
OTU_615	Bacteria	Actinobacteria	Actinobacteria	Micromonosporales	Micromonosporaceae	unc_Micromonosporaceae	OTU_615 (unc_Micromonosporaceae)
OTU_1957	Bacteria	Actinobacteria	Actinobacteria	Micrococcales	Promicromonosporaceae	unc_Promicromonosporaceae	OTU_1957 (unc_Promicromonosporaceae)
OTU_1495	Bacteria	Firmicutes	Bacilli	Bacillales	Paenibacillaceae1	Paenibacillus	OTU_1495 (unc_Paenibacillus)
OTU_897	Bacteria	Acidobacteria	Acidobacteria_Gp5	Gp5	Gp5	Gp5	OTU_897 (unc_Gp5)
OTU_975	Bacteria	Gemmatimonadetes	Gemmatimonadetes	Gemmatimonadales	Gemmatimonadaceae	unc_Gemmatimonadaceae	OTU_975 (unc_Gemmatimonadaceae)
OTU_1441	Bacteria	Chloroflexi	Chloroflexia	Herpetosiphonales	Herpetosiphonaceae	Herpetosiphon	OTU_1441 (unc_Herpetosiphon)
OTU_1797	Bacteria	unc_Bacteria	unc_Bacteria	unc_Bacteria	unc_Bacteria	unc_Bacteria	OTU_1797 (unc_Bacteria)
OTU_1555	Bacteria	Acidobacteria	Acidobacteria_Gp11	Gp11	Gp11	Gp11	OTU_1555 (unc_Gp11)
OTU_619	Archaea	Thaumarchaeota	unc_Thaumarchaeota	Nitrososphaerales	Nitrososphaeraceae	Nitrososphaera	OTU_619 (Nitrososphaera_viennensis)
OTU_1743	Bacteria	Proteobacteria	Gammaproteobacteria	Chromatiales	unc_Chromatiales	unc_Chromatiales	OTU_1743 (unc_Chromatiales)
OTU_1986	Bacteria	Actinobacteria	Actinobacteria	Micromonosporales	Micromonosporaceae	Longispora	OTU_1986 (unc_Longispora)
OTU_3078	Bacteria	Acidobacteria	Acidobacteria_Gp10	Gp10	Gp10	Gp10	OTU_3078 (unc_Gp10)
OTU_759	Bacteria	Acidobacteria	Acidobacteria_Gp4	Gp4	Gp4	Gp4	OTU_759 (unc_Gp4)
OTU_1176	Bacteria	Actinobacteria	Acidimicrobiia	Acidimicrobiales	Ilumatobacteraceae	Ilumatobacter	OTU_1176 (unc_Ilumatobacter)
OTU_1667	Bacteria	unc_Bacteria	unc_Bacteria	unc_Bacteria	unc_Bacteria	unc_Bacteria	OTU_1667 (unc_Bacteria)
OTU_3013	Bacteria	unc_Bacteria	unc_Bacteria	unc_Bacteria	unc_Bacteria	unc_Bacteria	OTU_3013 (unc_Bacteria)
OTU_979	Bacteria	Actinobacteria	Actinobacteria	unc_Actinobacteria	unc_Actinobacteria	unc_Actinobacteria	OTU_979 (unc_Actinobacteria)
OTU_2697	Bacteria	Acidobacteria	Acidobacteria_Gp6	Gp6	Gp6	Gp6	OTU_2697 (unc_Gp6)
OTU_1516	Bacteria	Gemmatimonadetes	Gemmatimonadetes	Gemmatimonadales	Gemmatimonadaceae	Gemmatirosa	OTU_1516 (unc_Gemmatirosa)
OTU_5166	Bacteria	Firmicutes	unc_Firmicutes	unc_Firmicutes	unc_Firmicutes	unc_Firmicutes	OTU_5166 (unc_Firmicutes)
OTU_3001	Bacteria	Acidobacteria	Acidobacteria	unc_Acidobacteria	unc_Acidobacteria	Gp6	OTU_3001 (unc_Gp6)
OTU_2914	Bacteria	Verrucomicrobia	Opitutae	Opitutales	Opitutaceae	unc_Opitutaceae	OTU_2914 (unc_Opitutaceae)
OTU_5980	Bacteria	Acidobacteria	Acidobacteria_Gp6	Gp6	Gp6	Gp6	OTU_5980 (unc_Gp6)
OTU_1791	Bacteria	Acidobacteria	Blastocatellia	Blastocatellales	Blastocatellaceae	Stenotrophobacter	OTU_1791 (Stenotrophobacter_terrae)
OTU_2530	Bacteria	Proteobacteria	Gammaproteobacteria	Xanthomonadales	Rhodanobacteraceae	unc_Rhodanobacteraceae	OTU_2530 (unc_Rhodanobacteraceae)
OTU_1727	Bacteria	Proteobacteria	Alphaproteobacteria	Rhodospirillales	Acetobacteraceae	unc_Acetobacteraceae	OTU_1727 (unc_Acetobacteraceae)
OTU_324	Bacteria	Actinobacteria	Actinobacteria	unc_Actinobacteria	unc_Actinobacteria	unc_Actinobacteria	OTU_324 (unc_Actinobacteria)
OTU_2260	Bacteria	Acidobacteria	Acidobacteria_Gp18	Gp18	Gp18	Gp18	OTU_2260 (unc_Gp18)
OTU_3039	Bacteria	Firmicutes	Bacilli	Bacillales	Paenibacillaceae1	Paenibacillus	OTU_3039 (Paenibacillus_arcticus)
OTU_2433	Bacteria	Actinobacteria	Actinobacteria	Propionibacteriales	Nocardioidaceae	Marmoricola	OTU_2433 (unc_Marmoricola)
OTU_713	Bacteria	Actinobacteria	Actinobacteria	unc_Actinobacteria	unc_Actinobacteria	unc_Actinobacteria	OTU_713 (unc_Actinobacteria)
OTU_1127	Bacteria	Latescibacteria	Latescibacteria_genera_incertae_sedis	Latescibacteria_genera_incertae_sedis	Latescibacteria_genera_incertae_sedis	Latescibacteria_genera_incertae_sedis	OTU_1127 (unc_Latescibacteria_genera_incertae_sedis)
OTU_7248	Bacteria	Acidobacteria	Acidobacteria_Gp6	Gp6	Gp6	Gp6	OTU_7248 (unc_Gp6)
OTU_1164	Bacteria	Acidobacteria	Acidobacteria	unc_Acidobacteria	unc_Acidobacteria	Gp6	OTU_1164 (unc_Gp6)
OTU_2020	Bacteria	Proteobacteria	Gammaproteobacteria	Gammaproteobacteria_incertae	unc_Gammaproteobacteria_incertae	Acidibacter	OTU_2020 (Acidibacter_ferrireducens)
OTU_983	Bacteria	Gemmatimonadetes	Gemmatimonadetes	Gemmatimonadales	Gemmatimonadaceae	unc_Gemmatimonadaceae	OTU_983 (unc_Gemmatimonadaceae)
OTU_1087	Bacteria	Actinobacteria	Actinobacteria	Micrococcales	Microbacteriaceae	Microbacterium	OTU_1087 (unc_Microbacterium)
OTU_730	Bacteria	Actinobacteria	Thermoleophilia	unc_Thermoleophilia	unc_Thermoleophilia	unc_Thermoleophilia	OTU_730 (unc_Thermoleophilia)
OTU_1175	Bacteria	Acidobacteria	Acidobacteria_Gp5	Gp5	Gp5	Gp5	OTU_1175 (unc_Gp5)
OTU_4645	Bacteria	Verrucomicrobia	Spartobacteria	Spartobacteria_genera_incertae_sedis	Spartobacteria_genera_incertae_sedis	Spartobacteria_genera_incertae_sedis	OTU_4645 (unc_Spartobacteria_genera_incertae_sedis)
OTU_1707	Bacteria	unc_Bacteria	unc_Bacteria	unc_Bacteria	unc_Bacteria	unc_Bacteria	OTU_1707 (unc_Bacteria)
OTU_1974	Bacteria	Proteobacteria	Alphaproteobacteria	Rhodobacterales	Rhodobacteraceae	Rubellimicrobium	OTU_1974 (unc_Rubellimicrobium)
OTU_1876	Bacteria	Gemmatimonadetes	Gemmatimonadetes	Gemmatimonadales	Gemmatimonadaceae	unc_Gemmatimonadaceae	OTU_1876 (unc_Gemmatimonadaceae)
OTU_1185	Bacteria	unc_Bacteria	unc_Bacteria	unc_Bacteria	unc_Bacteria	unc_Bacteria	OTU_1185 (unc_Bacteria)
OTU_2599	Bacteria	Proteobacteria	Alphaproteobacteria	Caulobacterales	Caulobacteraceae	Caulobacter	OTU_2599 (unc_Caulobacter)
OTU_1043	Bacteria	Actinobacteria	Acidimicrobiia	Acidimicrobiales	Iamiaceae	Aquihabitans	OTU_1043 (unc_Aquihabitans)
OTU_3649	Bacteria	candidate division WPS-1	WPS-1_genera_incertae_sedis	WPS-1_genera_incertae_sedis	WPS-1_genera_incertae_sedis	WPS-1_genera_incertae_sedis	OTU_3649 (unc_WPS-1_genera_incertae_sedis)
OTU_1180	Bacteria	unc_Bacteria	unc_Bacteria	unc_Bacteria	unc_Bacteria	unc_Bacteria	OTU_1180 (unc_Bacteria)
OTU_3261	Bacteria	Acidobacteria	Acidobacteria_Gp16	Gp16	Gp16	Gp16	OTU_3261 (unc_Gp16)
OTU_3594	Bacteria	Acidobacteria	Acidobacteria_Gp6	Gp6	Gp6	Gp6	OTU_3594 (unc_Gp6)
OTU_1558	Bacteria	Actinobacteria	Thermoleophilia	Gaiellales	Gaiellaceae	Gaiella	OTU_1558 (unc_Gaiella)
OTU_1798	Bacteria	Proteobacteria	Deltaproteobacteria	Myxococcales	Nannocystaceae	Enhygromyxa	OTU_1798 (unc_Enhygromyxa)
OTU_4402	Bacteria	Actinobacteria	Thermoleophilia	Solirubrobacterales	unc_Solirubrobacterales	unc_Solirubrobacterales	OTU_4402 (unc_Solirubrobacterales)
OTU_1222	Bacteria	Latescibacteria	unc_Latescibacteria	unc_Latescibacteria	unc_Latescibacteria	unc_Latescibacteria	OTU_1222 (unc_Latescibacteria)
OTU_5446	Bacteria	Actinobacteria	Acidimicrobiia	Acidimicrobiales	Ilumatobacteraceae	unc_Ilumatobacteraceae	OTU_5446 (unc_Ilumatobacteraceae)
OTU_2341	Bacteria	unc_Bacteria	unc_Bacteria	unc_Bacteria	unc_Bacteria	unc_Bacteria	OTU_2341 (unc_Bacteria)
OTU_923	Bacteria	Actinobacteria	Acidimicrobiia	Acidimicrobiales	unc_Acidimicrobiales	unc_Acidimicrobiales	OTU_923 (unc_Acidimicrobiales)
OTU_5744	Bacteria	Firmicutes	Clostridia	Clostridiales	Symbiobacteriaceae	Symbiobacterium	OTU_5744 (unc_Symbiobacterium)
OTU_866	Bacteria	unc_Bacteria	unc_Bacteria	unc_Bacteria	unc_Bacteria	unc_Bacteria	OTU_866 (unc_Bacteria)
OTU_486	Bacteria	Actinobacteria	Actinobacteria	unc_Actinobacteria	unc_Actinobacteria	unc_Actinobacteria	OTU_486 (unc_Actinobacteria)
OTU_1599	Bacteria	Acidobacteria	Blastocatellia	Blastocatellales	Blastocatellaceae	unc_Blastocatellaceae	OTU_1599 (unc_Blastocatellaceae)
OTU_7849	Bacteria	Firmicutes	Bacilli	Bacillales	Planococcaceae	Sporosarcina	OTU_7849 (unc_Sporosarcina)
OTU_7258	Bacteria	Actinobacteria	Actinobacteria	Propionibacteriales	Nocardioidaceae	unc_Nocardioidaceae	OTU_7258 (unc_Nocardioidaceae)
OTU_3873	Bacteria	Acidobacteria	Acidobacteria_Gp5	Gp5	Gp5	Gp5	OTU_3873 (unc_Gp5)
OTU_1459	Bacteria	candidate division WPS-1	WPS-1_genera_incertae_sedis	WPS-1_genera_incertae_sedis	WPS-1_genera_incertae_sedis	WPS-1_genera_incertae_sedis	OTU_1459 (unc_WPS-1_genera_incertae_sedis)
OTU_8659	Bacteria	Actinobacteria	Thermoleophilia	Gaiellales	Gaiellaceae	Gaiella	OTU_8659 (unc_Gaiella)
OTU_1541	Bacteria	Verrucomicrobia	Subdivision3	Subdivision3_genera_incertae_sedis	Subdivision3_genera_incertae_sedis	Subdivision3_genera_incertae_sedis	OTU_1541 (unc_Subdivision3_genera_incertae_sedis)
OTU_1526	Bacteria	Acidobacteria	Acidobacteria_Gp7	Gp7	Gp7	Gp7	OTU_1526 (unc_Gp7)
OTU_1178	Bacteria	unc_Bacteria	unc_Bacteria	unc_Bacteria	unc_Bacteria	unc_Bacteria	OTU_1178 (unc_Bacteria)
OTU_1006	Bacteria	Proteobacteria	Deltaproteobacteria	Myxococcales	unc_Myxococcales	unc_Myxococcales	OTU_1006 (unc_Myxococcales)
OTU_1013	Bacteria	Bacteroidetes	Cytophagia	Cytophagales	Hymenobacteraceae	Hymenobacter	OTU_1013 (unc_Hymenobacter)
OTU_1867	Bacteria	Latescibacteria	Latescibacteria_genera_incertae_sedis	Latescibacteria_genera_incertae_sedis	Latescibacteria_genera_incertae_sedis	Latescibacteria_genera_incertae_sedis	OTU_1867 (unc_Latescibacteria_genera_incertae_sedis)
OTU_1430	Bacteria	Actinobacteria	Acidimicrobiia	Acidimicrobiales	unc_Acidimicrobiales	unc_Acidimicrobiales	OTU_1430 (unc_Acidimicrobiales)
OTU_1838	Bacteria	Acidobacteria	Acidobacteria_Gp7	Gp7	Gp7	Gp7	OTU_1838 (unc_Gp7)
OTU_936	Bacteria	Actinobacteria	unc_Actinobacteria	unc_Actinobacteria	unc_Actinobacteria	unc_Actinobacteria	OTU_936 (unc_Actinobacteria)
OTU_1818	Bacteria	Proteobacteria	Betaproteobacteria	Burkholderiales	Comamonadaceae	Rhizobacter	OTU_1818 (unc_Rhizobacter)
OTU_817	Bacteria	Firmicutes	Clostridia	Clostridiales	Clostridiaceae1	Clostridiumsensustricto	OTU_817 (unc_Clostridiumsensustricto)
OTU_1749	Bacteria	Firmicutes	Bacilli	Bacillales	Paenibacillaceae1	Paenibacillus	OTU_1749 (unc_Paenibacillus)
OTU_1022	Bacteria	unc_Bacteria	unc_Bacteria	unc_Bacteria	unc_Bacteria	unc_Bacteria	OTU_1022 (unc_Bacteria)
OTU_900	Bacteria	Proteobacteria	unc_Proteobacteria	unc_Proteobacteria	unc_Proteobacteria	unc_Proteobacteria	OTU_900 (unc_Proteobacteria)
OTU_1444	Bacteria	Acidobacteria	Acidobacteria_Gp4	Gp4	Gp4	Gp4	OTU_1444 (unc_Gp4)
OTU_1213	Bacteria	Proteobacteria	Deltaproteobacteria	Myxococcales	Myxococcaceae	unc_Myxococcaceae	OTU_1213 (unc_Myxococcaceae)
OTU_1449	Bacteria	Actinobacteria	Actinobacteria	Mycobacteriales	Nocardiaceae	Nocardia	OTU_1449 (unc_Nocardia)
OTU_2965	Bacteria	Proteobacteria	Deltaproteobacteria	Myxococcales	Polyangiaceae	Polyangium	OTU_2965 (unc_Polyangium)
OTU_5875	Bacteria	Actinobacteria	Actinobacteria	Micrococcales	Microbacteriaceae	unc_Microbacteriaceae	OTU_5875 (unc_Microbacteriaceae)
OTU_3414	Bacteria	Proteobacteria	Alphaproteobacteria	Rhizobiales	unc_Rhizobiales	unc_Rhizobiales	OTU_3414 (unc_Rhizobiales)
OTU_2010	Bacteria	Verrucomicrobia	Subdivision3	Subdivision3_genera_incertae_sedis	Subdivision3_genera_incertae_sedis	Subdivision3_genera_incertae_sedis	OTU_2010 (unc_Subdivision3_genera_incertae_sedis)
OTU_1130	Bacteria	Proteobacteria	Gammaproteobacteria	Xanthomonadales	Xanthomonadaceae	Lysobacter	OTU_1130 (Lysobacter_psychrotolerans)
OTU_3496	Bacteria	Actinobacteria	Thermoleophilia	unc_Thermoleophilia	unc_Thermoleophilia	unc_Thermoleophilia	OTU_3496 (unc_Thermoleophilia)
OTU_226	Bacteria	Actinobacteria	Rubrobacteria	Rubrobacterales	Rubrobacteraceae	Rubrobacter	OTU_226 (unc_Rubrobacter)
OTU_1433	Bacteria	unc_Bacteria	unc_Bacteria	unc_Bacteria	unc_Bacteria	unc_Bacteria	OTU_1433 (unc_Bacteria)
OTU_2893	Bacteria	Actinobacteria	Thermoleophilia	Solirubrobacterales	unc_Solirubrobacterales	unc_Solirubrobacterales	OTU_2893 (unc_Solirubrobacterales)
OTU_2662	Bacteria	Acidobacteria	Acidobacteria	unc_Acidobacteria	unc_Acidobacteria	unc_Acidobacteria	OTU_2662 (unc_Acidobacteria)
OTU_2585	Bacteria	Gemmatimonadetes	Gemmatimonadetes	Gemmatimonadales	Gemmatimonadaceae	unc_Gemmatimonadaceae	OTU_2585 (unc_Gemmatimonadaceae)
OTU_2301	Bacteria	Acidobacteria	Acidobacteria_Gp16	Gp16	Gp16	Gp16	OTU_2301 (unc_Gp16)
OTU_1363	Bacteria	Acidobacteria	Acidobacteria_Gp4	Gp4	Gp4	Gp4	OTU_1363 (unc_Gp4)
OTU_2195	Bacteria	Acidobacteria	Acidobacteria_Gp4	Gp4	Gp4	Gp4	OTU_2195 (unc_Gp4)
OTU_1372	Bacteria	Acidobacteria	unc_Acidobacteria	unc_Acidobacteria	unc_Acidobacteria	unc_Acidobacteria	OTU_1372 (unc_Acidobacteria)
OTU_2672	Bacteria	Actinobacteria	Actinobacteria	Geodermatophilales	Geodermatophilaceae	Geodermatophilus	OTU_2672 (unc_Geodermatophilus)
OTU_5234	Bacteria	Firmicutes	Bacilli	Bacillales	Bacillaceae1	Bacillus	OTU_5234 (unc_Bacillus)
OTU_2809	Bacteria	Chloroflexi	Caldilineae	Caldilineales	Caldilineaceae	Litorilinea	OTU_2809 (unc_Litorilinea)
OTU_2598	Bacteria	Acidobacteria	Acidobacteria_Gp6	Gp6	Gp6	Gp6	OTU_2598 (unc_Gp6)
OTU_620	Bacteria	Proteobacteria	Alphaproteobacteria	Rhodospirillales	Geminicoccaceae	unc_Geminicoccaceae	OTU_620 (unc_Geminicoccaceae)
OTU_7932	Bacteria	Actinobacteria	Actinobacteria	Streptosporangiales	Streptosporangiaceae	Nonomuraea	OTU_7932 (unc_Nonomuraea)
OTU_1031	Bacteria	unc_Bacteria	unc_Bacteria	unc_Bacteria	unc_Bacteria	unc_Bacteria	OTU_1031 (unc_Bacteria)
OTU_4383	Bacteria	Latescibacteria	Latescibacteria_genera_incertae_sedis	Latescibacteria_genera_incertae_sedis	Latescibacteria_genera_incertae_sedis	Latescibacteria_genera_incertae_sedis	OTU_4383 (unc_Latescibacteria_genera_incertae_sedis)
OTU_6548	Bacteria	Acidobacteria	Acidobacteria_Gp6	Gp6	Gp6	Gp6	OTU_6548 (unc_Gp6)
OTU_1117	Bacteria	Proteobacteria	Betaproteobacteria	unc_Betaproteobacteria	unc_Betaproteobacteria	unc_Betaproteobacteria	OTU_1117 (unc_Betaproteobacteria)
OTU_1395	Bacteria	unc_Bacteria	unc_Bacteria	unc_Bacteria	unc_Bacteria	unc_Bacteria	OTU_1395 (unc_Bacteria)
OTU_880	Bacteria	Actinobacteria	unc_Actinobacteria	unc_Actinobacteria	unc_Actinobacteria	unc_Actinobacteria	OTU_880 (unc_Actinobacteria)
OTU_1359	Bacteria	Firmicutes	Bacilli	Bacillales	Bacillaceae2	Terribacillus	OTU_1359 (unc_Terribacillus)
OTU_2270	Bacteria	Gemmatimonadetes	Gemmatimonadetes	Gemmatimonadales	Gemmatimonadaceae	Gemmatimonas	OTU_2270 (unc_Gemmatimonas)
OTU_1153	Bacteria	Acidobacteria	Acidobacteria	unc_Acidobacteria	unc_Acidobacteria	Gp3	OTU_1153 (unc_Gp3)
OTU_1643	Bacteria	Acidobacteria	Acidobacteria_Gp3	Candidatus Solibacter	Candidatus Solibacter	Candidatus Solibacter	OTU_1643 (unc_Candidatus Solibacter)
OTU_660	Bacteria	Actinobacteria	Actinobacteria	Mycobacteriales	Nocardiaceae	Nocardia	OTU_660 (Nocardia_zapadnayensis)
OTU_4386	Bacteria	Verrucomicrobia	Opitutae	Opitutales	Opitutaceae	Opitutus	OTU_4386 (unc_Opitutus)
OTU_3948	Bacteria	Acidobacteria	Acidobacteria	unc_Acidobacteria	unc_Acidobacteria	Gp6	OTU_3948 (unc_Gp6)
OTU_1118	Bacteria	Proteobacteria	Alphaproteobacteria	Rhodospirillales	Acetobacteraceae	unc_Acetobacteraceae	OTU_1118 (unc_Acetobacteraceae)
OTU_3336	Bacteria	Actinobacteria	Thermoleophilia	Solirubrobacterales	Solirubrobacteraceae	Solirubrobacter	OTU_3336 (unc_Solirubrobacter)
OTU_2752	Bacteria	Actinobacteria	Actinobacteria	Propionibacteriales	Propionibacteriaceae	Microlunatus	OTU_2752 (unc_Microlunatus)
OTU_1243	Bacteria	unc_Bacteria	unc_Bacteria	unc_Bacteria	unc_Bacteria	unc_Bacteria	OTU_1243 (unc_Bacteria)
OTU_4380	Bacteria	Actinobacteria	Actinobacteria	Micromonosporales	Micromonosporaceae	unc_Micromonosporaceae	OTU_4380 (unc_Micromonosporaceae)
OTU_1268	Bacteria	Proteobacteria	Alphaproteobacteria	Rhizobiales	Hyphomicrobiaceae	Hyphomicrobium	OTU_1268 (unc_Hyphomicrobium)
OTU_793	Bacteria	Proteobacteria	Alphaproteobacteria	Rhodospirillales	unc_Rhodospirillales	unc_Rhodospirillales	OTU_793 (unc_Rhodospirillales)
OTU_1545	Bacteria	Actinobacteria	Thermoleophilia	Solirubrobacterales	unc_Solirubrobacterales	unc_Solirubrobacterales	OTU_1545 (unc_Solirubrobacterales)
OTU_1475	Bacteria	Gemmatimonadetes	Gemmatimonadetes	Gemmatimonadales	Gemmatimonadaceae	unc_Gemmatimonadaceae	OTU_1475 (unc_Gemmatimonadaceae)
OTU_2467	Bacteria	Proteobacteria	Alphaproteobacteria	unc_Alphaproteobacteria	unc_Alphaproteobacteria	unc_Alphaproteobacteria	OTU_2467 (unc_Alphaproteobacteria)
OTU_9112	Bacteria	Actinobacteria	Actinobacteria	Pseudonocardiales	Pseudonocardiaceae	Pseudonocardia	OTU_9112 (unc_Pseudonocardia)
OTU_1977	Bacteria	Firmicutes	Bacilli	Bacillales	Alicyclobacillaceae	Tumebacillus	OTU_1977 (Tumebacillus_permanentifrigoris)
OTU_5585	Bacteria	Chloroflexi	Thermomicrobia	Sphaerobacterales	Sphaerobacteraceae	Sphaerobacter	OTU_5585 (unc_Sphaerobacter)
OTU_1384	Bacteria	Chloroflexi	Anaerolineae	unc_Anaerolineae	unc_Anaerolineae	unc_Anaerolineae	OTU_1384 (unc_Anaerolineae)
OTU_1440	Bacteria	Verrucomicrobia	Spartobacteria	Spartobacteria_genera_incertae_sedis	Spartobacteria_genera_incertae_sedis	Spartobacteria_genera_incertae_sedis	OTU_1440 (unc_Spartobacteria_genera_incertae_sedis)
OTU_1915	Bacteria	Acidobacteria	Acidobacteria_Gp3	Gp3	Gp3	Gp3	OTU_1915 (unc_Gp3)
OTU_4993	Bacteria	Nitrospirae	Nitrospira	Nitrospirales	Nitrospiraceae	Nitrospira	OTU_4993 (unc_Nitrospira)
OTU_1231	Bacteria	Acidobacteria	Acidobacteria_Gp6	Gp6	Gp6	Gp6	OTU_1231 (unc_Gp6)
OTU_1007	Bacteria	Firmicutes	Bacilli	Bacillales	Paenibacillaceae1	Thermobacillus	OTU_1007 (unc_Thermobacillus)
OTU_1614	Bacteria	Acidobacteria	Acidobacteria_Gp7	Gp7	Gp7	Gp7	OTU_1614 (unc_Gp7)
OTU_1247	Bacteria	unc_Bacteria	unc_Bacteria	unc_Bacteria	unc_Bacteria	unc_Bacteria	OTU_1247 (unc_Bacteria)
OTU_960	Bacteria	candidate division WPS-1	WPS-1_genera_incertae_sedis	WPS-1_genera_incertae_sedis	WPS-1_genera_incertae_sedis	WPS-1_genera_incertae_sedis	OTU_960 (unc_WPS-1_genera_incertae_sedis)
OTU_1309	Bacteria	Proteobacteria	Alphaproteobacteria	Rhodospirillales	unc_Rhodospirillales	unc_Rhodospirillales	OTU_1309 (unc_Rhodospirillales)
OTU_4424	Bacteria	Actinobacteria	Actinobacteria	Streptosporangiales	Streptosporangiaceae	unc_Streptosporangiaceae	OTU_4424 (unc_Streptosporangiaceae)
OTU_908	Bacteria	Proteobacteria	Alphaproteobacteria	Rhodospirillales	Geminicoccaceae	Arboricoccus	OTU_908 (unc_Arboricoccus)
OTU_2006	Bacteria	Acidobacteria	unc_Acidobacteria	unc_Acidobacteria	unc_Acidobacteria	unc_Acidobacteria	OTU_2006 (unc_Acidobacteria)
OTU_889	Bacteria	Actinobacteria	Actinobacteria	unc_Actinobacteria	unc_Actinobacteria	unc_Actinobacteria	OTU_889 (unc_Actinobacteria)
OTU_1353	Bacteria	Actinobacteria	Actinobacteria	Propionibacteriales	Propionibacteriaceae	Microlunatus	OTU_1353 (unc_Microlunatus)
OTU_5539	Bacteria	Actinobacteria	Acidimicrobiia	Acidimicrobiales	Iamiaceae	Actinomarinicola	OTU_5539 (unc_Actinomarinicola)
OTU_1697	Bacteria	Verrucomicrobia	Subdivision3	Subdivision3_genera_incertae_sedis	Subdivision3_genera_incertae_sedis	Subdivision3_genera_incertae_sedis	OTU_1697 (unc_Subdivision3_genera_incertae_sedis)
OTU_8303	Bacteria	Firmicutes	Bacilli	Bacillales	Paenibacillaceae1	Paenibacillus	OTU_8303 (unc_Paenibacillus)
OTU_2233	Bacteria	Proteobacteria	Alphaproteobacteria	Caulobacterales	Hyphomonadaceae	Asprobacter	OTU_2233 (Asprobacter_aquaticus)
OTU_1756	Bacteria	Verrucomicrobia	Spartobacteria	Spartobacteria_genera_incertae_sedis	Spartobacteria_genera_incertae_sedis	Spartobacteria_genera_incertae_sedis	OTU_1756 (unc_Spartobacteria_genera_incertae_sedis)
OTU_1632	Bacteria	Acidobacteria	Acidobacteria_Gp17	Gp17	Gp17	Gp17	OTU_1632 (unc_Gp17)
OTU_252	Bacteria	Actinobacteria	Thermoleophilia	Solirubrobacterales	unc_Solirubrobacterales	unc_Solirubrobacterales	OTU_252 (unc_Solirubrobacterales)
OTU_2110	Bacteria	Firmicutes	Bacilli	Bacillales	Thermoactinomycetaceae 1	Shimazuella	OTU_2110 (unc_Shimazuella)
OTU_452	Bacteria	Bacteroidetes	Chitinophagia	Chitinophagales	Chitinophagaceae	unc_Chitinophagaceae	OTU_452 (unc_Chitinophagaceae)
OTU_1082	Bacteria	CandidatusSaccharibacteria	unc_CandidatusSaccharibacteria	unc_CandidatusSaccharibacteria	unc_CandidatusSaccharibacteria	unc_CandidatusSaccharibacteria	OTU_1082 (unc_CandidatusSaccharibacteria)
OTU_1119	Bacteria	Actinobacteria	Acidimicrobiia	Acidimicrobiales	Iamiaceae	Actinomarinicola	OTU_1119 (unc_Actinomarinicola)
OTU_3093	Bacteria	Proteobacteria	Betaproteobacteria	unc_Betaproteobacteria	unc_Betaproteobacteria	unc_Betaproteobacteria	OTU_3093 (unc_Betaproteobacteria)
OTU_1039	Bacteria	Acidobacteria	Acidobacteria_Gp3	Gp3	Gp3	Gp3	OTU_1039 (unc_Gp3)
OTU_2356	Bacteria	Acidobacteria	Acidobacteria_Gp4	Gp4	Gp4	Gp4	OTU_2356 (unc_Gp4)
OTU_795	Bacteria	Actinobacteria	Acidimicrobiia	Acidimicrobiales	Ilumatobacteraceae	unc_Ilumatobacteraceae	OTU_795 (unc_Ilumatobacteraceae)
OTU_1715	Bacteria	Chloroflexi	Chloroflexia	Kallotenuales	Kallotenuaceae	Kallotenue	OTU_1715 (unc_Kallotenue)
OTU_3086	Bacteria	Proteobacteria	Deltaproteobacteria	Myxococcales	unc_Myxococcales	unc_Myxococcales	OTU_3086 (unc_Myxococcales)
OTU_2653	Bacteria	Chloroflexi	unc_Chloroflexi	unc_Chloroflexi	unc_Chloroflexi	unc_Chloroflexi	OTU_2653 (unc_Chloroflexi)
OTU_1620	Bacteria	Chloroflexi	Anaerolineae	Anaerolineales	Anaerolineaceae	unc_Anaerolineaceae	OTU_1620 (unc_Anaerolineaceae)
OTU_1726	Bacteria	Acidobacteria	Acidobacteria_Gp2	Gp2	Gp2	Gp2	OTU_1726 (unc_Gp2)
OTU_1834	Bacteria	Acidobacteria	Acidobacteria_Gp1	Gp1	Gp1	Gp1	OTU_1834 (unc_Gp1)
OTU_3436	Bacteria	Acidobacteria	Acidobacteria_Gp4	Gp4	Gp4	Gp4	OTU_3436 (unc_Gp4)
OTU_1476	Bacteria	Acidobacteria	Acidobacteria_Gp6	Gp6	Gp6	Gp6	OTU_1476 (unc_Gp6)
OTU_1864	Bacteria	Gemmatimonadetes	Gemmatimonadetes	Gemmatimonadales	Gemmatimonadaceae	Roseisolibacter	OTU_1864 (unc_Roseisolibacter)
OTU_2287	Bacteria	Gemmatimonadetes	Gemmatimonadetes	Gemmatimonadales	Gemmatimonadaceae	Roseisolibacter	OTU_2287 (unc_Roseisolibacter)
OTU_4314	Bacteria	Proteobacteria	Alphaproteobacteria	Sphingomonadales	Sphingomonadaceae	Sphingomonas	OTU_4314 (unc_Sphingomonas)
OTU_1708	Bacteria	Gemmatimonadetes	Gemmatimonadetes	Gemmatimonadales	Gemmatimonadaceae	unc_Gemmatimonadaceae	OTU_1708 (unc_Gemmatimonadaceae)
OTU_857	Bacteria	Proteobacteria	Alphaproteobacteria	Rhizobiales	unc_Rhizobiales	unc_Rhizobiales	OTU_857 (unc_Rhizobiales)
OTU_1273	Bacteria	Actinobacteria	Thermoleophilia	Solirubrobacterales	unc_Solirubrobacterales	unc_Solirubrobacterales	OTU_1273 (unc_Solirubrobacterales)
OTU_3952	Bacteria	Verrucomicrobia	Spartobacteria	Spartobacteria_genera_incertae_sedis	Spartobacteria_genera_incertae_sedis	Spartobacteria_genera_incertae_sedis	OTU_3952 (unc_Spartobacteria_genera_incertae_sedis)
OTU_1009	Bacteria	unc_Bacteria	unc_Bacteria	unc_Bacteria	unc_Bacteria	unc_Bacteria	OTU_1009 (unc_Bacteria)
OTU_981	Bacteria	Proteobacteria	Gammaproteobacteria	Nevskiales	Steroidobacteraceae	unc_Steroidobacteraceae	OTU_981 (unc_Steroidobacteraceae)
OTU_1018	Bacteria	Firmicutes	unc_Firmicutes	unc_Firmicutes	unc_Firmicutes	unc_Firmicutes	OTU_1018 (unc_Firmicutes)
OTU_7114	Bacteria	Actinobacteria	Actinobacteria	unc_Actinobacteria	unc_Actinobacteria	unc_Actinobacteria	OTU_7114 (unc_Actinobacteria)
OTU_1886	Bacteria	Acidobacteria	Acidobacteria_Gp1	Gp1	Gp1	Gp1	OTU_1886 (unc_Gp1)
OTU_2678	Bacteria	Gemmatimonadetes	unc_Gemmatimonadetes	unc_Gemmatimonadetes	unc_Gemmatimonadetes	unc_Gemmatimonadetes	OTU_2678 (unc_Gemmatimonadetes)
OTU_1899	Bacteria	Gemmatimonadetes	Gemmatimonadetes	Gemmatimonadales	Gemmatimonadaceae	unc_Gemmatimonadaceae	OTU_1899 (unc_Gemmatimonadaceae)
OTU_1349	Bacteria	Actinobacteria	Acidimicrobiia	Acidimicrobiales	Ilumatobacteraceae	unc_Ilumatobacteraceae	OTU_1349 (unc_Ilumatobacteraceae)
OTU_1626	Bacteria	Firmicutes	Bacilli	Bacillales	Bacillaceae1	Caldibacillus	OTU_1626 (Caldibacillus_debilis)
OTU_684	Bacteria	Actinobacteria	Acidimicrobiia	Acidimicrobiales	Iamiaceae	unc_Iamiaceae	OTU_684 (unc_Iamiaceae)
OTU_1201	Bacteria	unc_Bacteria	unc_Bacteria	unc_Bacteria	unc_Bacteria	unc_Bacteria	OTU_1201 (unc_Bacteria)
OTU_1084	Bacteria	Acidobacteria	Blastocatellia	Blastocatellales	Arenimicrobiaceae	Brevitalea	OTU_1084 (Brevitalea_aridisoli)
OTU_811	Bacteria	Proteobacteria	Betaproteobacteria	Burkholderiales	unc_Burkholderiales	unc_Burkholderiales	OTU_811 (unc_Burkholderiales)
OTU_1916	Bacteria	Proteobacteria	Deltaproteobacteria	Myxococcales	Cystobacteraceae	unc_Cystobacteraceae	OTU_1916 (unc_Cystobacteraceae)
OTU_314	Bacteria	Acidobacteria	Acidobacteria_Gp17	Gp17	Gp17	Gp17	OTU_314 (unc_Gp17)
OTU_1041	Bacteria	Gemmatimonadetes	Gemmatimonadetes	Gemmatimonadales	Gemmatimonadaceae	unc_Gemmatimonadaceae	OTU_1041 (unc_Gemmatimonadaceae)
OTU_1066	Bacteria	unc_Bacteria	unc_Bacteria	unc_Bacteria	unc_Bacteria	unc_Bacteria	OTU_1066 (unc_Bacteria)
OTU_881	Bacteria	Acidobacteria	Acidobacteria_Gp3	Gp3	Gp3	Gp3	OTU_881 (unc_Gp3)
OTU_4297	Bacteria	Proteobacteria	Betaproteobacteria	unc_Betaproteobacteria	unc_Betaproteobacteria	unc_Betaproteobacteria	OTU_4297 (unc_Betaproteobacteria)
OTU_3152	Bacteria	Actinobacteria	Thermoleophilia	Solirubrobacterales	Conexibacteraceae	Conexibacter	OTU_3152 (unc_Conexibacter)
OTU_1683	Bacteria	Proteobacteria	Gammaproteobacteria	Xanthomonadales	Rhodanobacteraceae	unc_Rhodanobacteraceae	OTU_1683 (unc_Rhodanobacteraceae)
OTU_1512	Bacteria	Acidobacteria	Acidobacteria_Gp6	Gp6	Gp6	Gp6	OTU_1512 (unc_Gp6)
OTU_3216	Bacteria	Firmicutes	Bacilli	Bacillales	Bacillaceae1	Anoxybacillus	OTU_3216 (unc_Anoxybacillus)
OTU_1783	Bacteria	Actinobacteria	Thermoleophilia	Solirubrobacterales	unc_Solirubrobacterales	unc_Solirubrobacterales	OTU_1783 (unc_Solirubrobacterales)
OTU_1968	Bacteria	Verrucomicrobia	Spartobacteria	Spartobacteria_genera_incertae_sedis	Spartobacteria_genera_incertae_sedis	Spartobacteria_genera_incertae_sedis	OTU_1968 (unc_Spartobacteria_genera_incertae_sedis)
OTU_914	Bacteria	Proteobacteria	Gammaproteobacteria	Xanthomonadales	Xanthomonadaceae	Lysobacter	OTU_914 (unc_Lysobacter)
OTU_1853	Bacteria	Chloroflexi	unc_Chloroflexi	unc_Chloroflexi	unc_Chloroflexi	unc_Chloroflexi	OTU_1853 (unc_Chloroflexi)
OTU_1235	Bacteria	unc_Bacteria	unc_Bacteria	unc_Bacteria	unc_Bacteria	unc_Bacteria	OTU_1235 (unc_Bacteria)
OTU_1079	Bacteria	Proteobacteria	Betaproteobacteria	unc_Betaproteobacteria	unc_Betaproteobacteria	unc_Betaproteobacteria	OTU_1079 (unc_Betaproteobacteria)
OTU_5377	Bacteria	Acidobacteria	Acidobacteria_Gp25	Gp25	Gp25	Gp25	OTU_5377 (unc_Gp25)
OTU_8015	Bacteria	unc_Bacteria	unc_Bacteria	unc_Bacteria	unc_Bacteria	unc_Bacteria	OTU_8015 (unc_Bacteria)
OTU_1198	Bacteria	Actinobacteria	Thermoleophilia	Solirubrobacterales	unc_Solirubrobacterales	unc_Solirubrobacterales	OTU_1198 (unc_Solirubrobacterales)
OTU_3024	Bacteria	Gemmatimonadetes	Longimicrobia	Longimicrobiales	Longimicrobiaceae	Longimicrobium	OTU_3024 (Longimicrobium_terrae)
OTU_2680	Bacteria	Acidobacteria	Acidobacteria_Gp6	Gp6	Gp6	Gp6	OTU_2680 (unc_Gp6)
OTU_2139	Bacteria	Verrucomicrobia	Subdivision3	Subdivision3_genera_incertae_sedis	Subdivision3_genera_incertae_sedis	Subdivision3_genera_incertae_sedis	OTU_2139 (unc_Subdivision3_genera_incertae_sedis)
OTU_7427	Bacteria	Verrucomicrobia	Spartobacteria	Spartobacteria_genera_incertae_sedis	Spartobacteria_genera_incertae_sedis	Spartobacteria_genera_incertae_sedis	OTU_7427 (unc_Spartobacteria_genera_incertae_sedis)
OTU_1537	Bacteria	Firmicutes	Bacilli	Bacillales	Paenibacillaceae1	Paenibacillus	OTU_1537 (unc_Paenibacillus)
OTU_2414	Bacteria	Proteobacteria	Alphaproteobacteria	Rhizobiales	unc_Rhizobiales	unc_Rhizobiales	OTU_2414 (unc_Rhizobiales)
OTU_2133	Bacteria	Rhodothermaeota	Rhodothermia	Rhodothermales	unc_Rhodothermales	unc_Rhodothermales	OTU_2133 (unc_Rhodothermales)
OTU_1298	Bacteria	Acidobacteria	Acidobacteria_Gp25	Gp25	Gp25	Gp25	OTU_1298 (unc_Gp25)
OTU_3728	Bacteria	Chloroflexi	Thermomicrobia	Sphaerobacterales	Sphaerobacteraceae	unc_Sphaerobacteraceae	OTU_3728 (unc_Sphaerobacteraceae)
OTU_1503	Bacteria	Actinobacteria	unc_Actinobacteria	unc_Actinobacteria	unc_Actinobacteria	unc_Actinobacteria	OTU_1503 (unc_Actinobacteria)
OTU_1648	Bacteria	Proteobacteria	Betaproteobacteria	unc_Betaproteobacteria	unc_Betaproteobacteria	unc_Betaproteobacteria	OTU_1648 (unc_Betaproteobacteria)
OTU_1641	Bacteria	unc_Bacteria	unc_Bacteria	unc_Bacteria	unc_Bacteria	unc_Bacteria	OTU_1641 (unc_Bacteria)
OTU_867	Bacteria	Acidobacteria	Acidobacteria	unc_Acidobacteria	unc_Acidobacteria	Gp1	OTU_867 (unc_Gp1)
OTU_1187	Bacteria	Firmicutes	Bacilli	Bacillales	Planococcaceae	Rummeliibacillus	OTU_1187 (Rummeliibacillus_pycnus)
OTU_2575	Bacteria	Proteobacteria	Deltaproteobacteria	Myxococcales	Labilitrichaceae	Labilithrix	OTU_2575 (unc_Labilithrix)
OTU_6959	Bacteria	Actinobacteria	Thermoleophilia	Solirubrobacterales	unc_Solirubrobacterales	unc_Solirubrobacterales	OTU_6959 (unc_Solirubrobacterales)
OTU_1858	Bacteria	unc_Bacteria	unc_Bacteria	unc_Bacteria	unc_Bacteria	unc_Bacteria	OTU_1858 (unc_Bacteria)
OTU_1038	Bacteria	Bacteroidetes	Chitinophagia	Chitinophagales	Chitinophagaceae	unc_Chitinophagaceae	OTU_1038 (unc_Chitinophagaceae)
OTU_2484	Bacteria	Chloroflexi	Thermomicrobia	Sphaerobacterales	Sphaerobacteraceae	unc_Sphaerobacteraceae	OTU_2484 (unc_Sphaerobacteraceae)
OTU_749	Bacteria	Acidobacteria	unc_Acidobacteria	unc_Acidobacteria	unc_Acidobacteria	unc_Acidobacteria	OTU_749 (unc_Acidobacteria)
OTU_5809	Bacteria	Acidobacteria	Acidobacteria_Gp1	Gp1	Gp1	Gp1	OTU_5809 (unc_Gp1)
OTU_862	Bacteria	Firmicutes	Clostridia	Clostridiales	Lachnospiraceae	Herbinix	OTU_862 (Herbinix_luporum)
OTU_2196	Bacteria	Proteobacteria	Gammaproteobacteria	Xanthomonadales	unc_Xanthomonadales	unc_Xanthomonadales	OTU_2196 (unc_Xanthomonadales)
OTU_1203	Archaea	Thaumarchaeota	unc_Thaumarchaeota	Nitrososphaerales	Nitrososphaeraceae	Nitrososphaera	OTU_1203 (Nitrososphaera_viennensis)
OTU_7436	Bacteria	Gemmatimonadetes	Gemmatimonadetes	Gemmatimonadales	Gemmatimonadaceae	Gemmatimonas	OTU_7436 (unc_Gemmatimonas)
OTU_2027	Archaea	Euryarchaeota	Thermoplasmata	unc_Thermoplasmata	unc_Thermoplasmata	unc_Thermoplasmata	OTU_2027 (unc_Thermoplasmata)
OTU_2324	Bacteria	Proteobacteria	Alphaproteobacteria	unc_Alphaproteobacteria	unc_Alphaproteobacteria	unc_Alphaproteobacteria	OTU_2324 (unc_Alphaproteobacteria)
OTU_3615	Bacteria	unc_Bacteria	unc_Bacteria	unc_Bacteria	unc_Bacteria	unc_Bacteria	OTU_3615 (unc_Bacteria)
OTU_1406	Bacteria	Proteobacteria	Betaproteobacteria	unc_Betaproteobacteria	unc_Betaproteobacteria	unc_Betaproteobacteria	OTU_1406 (unc_Betaproteobacteria)
OTU_8938	Bacteria	Acidobacteria	Blastocatellia	Blastocatellales	Blastocatellaceae	Stenotrophobacter	OTU_8938 (unc_Stenotrophobacter)
OTU_1012	Bacteria	unc_Bacteria	unc_Bacteria	unc_Bacteria	unc_Bacteria	unc_Bacteria	OTU_1012 (unc_Bacteria)
OTU_6539	Bacteria	Acidobacteria	Acidobacteria_Gp6	Gp6	Gp6	Gp6	OTU_6539 (unc_Gp6)
OTU_2919	Bacteria	Chloroflexi	Caldilineae	Caldilineales	Caldilineaceae	Litorilinea	OTU_2919 (unc_Litorilinea)
OTU_1615	Bacteria	Proteobacteria	Alphaproteobacteria	Rhizobiales	unc_Rhizobiales	unc_Rhizobiales	OTU_1615 (unc_Rhizobiales)
OTU_1773	Bacteria	Verrucomicrobia	Subdivision3	Subdivision3_genera_incertae_sedis	Subdivision3_genera_incertae_sedis	Subdivision3_genera_incertae_sedis	OTU_1773 (unc_Subdivision3_genera_incertae_sedis)
OTU_1881	Bacteria	unc_Bacteria	unc_Bacteria	unc_Bacteria	unc_Bacteria	unc_Bacteria	OTU_1881 (unc_Bacteria)
OTU_3217	Bacteria	Firmicutes	Bacilli	Bacillales	Paenibacillaceae1	Paenibacillus	OTU_3217 (Paenibacillus_koleovorans)
OTU_1745	Bacteria	Actinobacteria	Thermoleophilia	Solirubrobacterales	unc_Solirubrobacterales	unc_Solirubrobacterales	OTU_1745 (unc_Solirubrobacterales)
OTU_2101	Bacteria	Firmicutes	Clostridia	Clostridiales	Lachnospiraceae	unc_Lachnospiraceae	OTU_2101 (unc_Lachnospiraceae)
OTU_1774	Bacteria	Bacteroidetes	Cytophagia	Cytophagales	Hymenobacteraceae	Adhaeribacter	OTU_1774 (Adhaeribacter_aquaticus)
OTU_1496	Bacteria	unc_Bacteria	unc_Bacteria	unc_Bacteria	unc_Bacteria	unc_Bacteria	OTU_1496 (unc_Bacteria)
OTU_2056	Bacteria	Gemmatimonadetes	Gemmatimonadetes	Gemmatimonadales	Gemmatimonadaceae	unc_Gemmatimonadaceae	OTU_2056 (unc_Gemmatimonadaceae)
OTU_6246	Bacteria	Acidobacteria	Acidobacteria_Gp6	Gp6	Gp6	Gp6	OTU_6246 (unc_Gp6)
OTU_2977	Bacteria	unc_Bacteria	unc_Bacteria	unc_Bacteria	unc_Bacteria	unc_Bacteria	OTU_2977 (unc_Bacteria)
OTU_1071	Bacteria	Acidobacteria	Acidobacteria_Gp9	Gp9	Gp9	Gp9	OTU_1071 (unc_Gp9)
OTU_1724	Bacteria	Acidobacteria	Acidobacteria_Gp6	Gp6	Gp6	Gp6	OTU_1724 (unc_Gp6)
OTU_1945	Bacteria	Cyanobacteria/Chloroplast	Chloroplast	Chloroplast	Chloroplast	unc_Chloroplast	OTU_1945 (unc_Chloroplast)
OTU_679	Bacteria	Actinobacteria	Actinobacteria	Pseudonocardiales	Pseudonocardiaceae	Actinophytocola	OTU_679 (unc_Actinophytocola)
OTU_1868	Bacteria	Proteobacteria	Betaproteobacteria	Burkholderiales	Comamonadaceae	Aquabacterium	OTU_1868 (Aquabacterium_pictum)
OTU_2686	Bacteria	Proteobacteria	Deltaproteobacteria	Myxococcales	Polyangiaceae	unc_Polyangiaceae	OTU_2686 (unc_Polyangiaceae)
OTU_3028	Bacteria	Proteobacteria	Deltaproteobacteria	Myxococcales	unc_Myxococcales	unc_Myxococcales	OTU_3028 (unc_Myxococcales)
OTU_2150	Bacteria	Acidobacteria	Acidobacteria	unc_Acidobacteria	unc_Acidobacteria	Gp6	OTU_2150 (unc_Gp6)
OTU_3435	Bacteria	Proteobacteria	Betaproteobacteria	Burkholderiales	Comamonadaceae	Rhizobacter	OTU_3435 (unc_Rhizobacter)
OTU_970	Bacteria	Actinobacteria	Acidimicrobiia	Acidimicrobiales	unc_Acidimicrobiales	unc_Acidimicrobiales	OTU_970 (unc_Acidimicrobiales)
OTU_2184	Bacteria	Proteobacteria	Alphaproteobacteria	Rhizobiales	unc_Rhizobiales	unc_Rhizobiales	OTU_2184 (unc_Rhizobiales)
OTU_3716	Bacteria	Bacteroidetes	unc_Bacteroidetes	unc_Bacteroidetes	unc_Bacteroidetes	unc_Bacteroidetes	OTU_3716 (unc_Bacteroidetes)
OTU_2178	Bacteria	Firmicutes	Negativicutes	Selenomonadales	Selenomonadaceae	Propionispira	OTU_2178 (unc_Propionispira)
OTU_1161	Bacteria	Acidobacteria	Acidobacteria_Gp7	Gp7	Gp7	Gp7	OTU_1161 (unc_Gp7)
OTU_980	Bacteria	unc_Bacteria	unc_Bacteria	unc_Bacteria	unc_Bacteria	unc_Bacteria	OTU_980 (unc_Bacteria)
OTU_1257	Bacteria	Latescibacteria	Latescibacteria_genera_incertae_sedis	Latescibacteria_genera_incertae_sedis	Latescibacteria_genera_incertae_sedis	Latescibacteria_genera_incertae_sedis	OTU_1257 (unc_Latescibacteria_genera_incertae_sedis)
OTU_2491	Bacteria	Acidobacteria	Acidobacteria_Gp6	Gp6	Gp6	Gp6	OTU_2491 (unc_Gp6)
OTU_3544	Bacteria	Proteobacteria	Alphaproteobacteria	unc_Alphaproteobacteria	unc_Alphaproteobacteria	unc_Alphaproteobacteria	OTU_3544 (unc_Alphaproteobacteria)
OTU_1493	Bacteria	Gemmatimonadetes	Gemmatimonadetes	Gemmatimonadales	Gemmatimonadaceae	unc_Gemmatimonadaceae	OTU_1493 (unc_Gemmatimonadaceae)
OTU_2216	Bacteria	Actinobacteria	Thermoleophilia	Gaiellales	Gaiellaceae	Gaiella	OTU_2216 (unc_Gaiella)
OTU_6126	Bacteria	Acidobacteria	Acidobacteria_Gp7	Gp7	Gp7	Gp7	OTU_6126 (unc_Gp7)
OTU_1909	Bacteria	Firmicutes	Bacilli	Bacillales	unc_Bacillales	unc_Bacillales	OTU_1909 (unc_Bacillales)
OTU_4295	Bacteria	Firmicutes	Bacilli	Bacillales	Paenibacillaceae1	Paenibacillus	OTU_4295 (unc_Paenibacillus)
OTU_2208	Bacteria	Proteobacteria	Deltaproteobacteria	Myxococcales	unc_Myxococcales	unc_Myxococcales	OTU_2208 (unc_Myxococcales)
OTU_1425	Bacteria	unc_Bacteria	unc_Bacteria	unc_Bacteria	unc_Bacteria	unc_Bacteria	OTU_1425 (unc_Bacteria)
OTU_1270	Bacteria	Chloroflexi	Anaerolineae	unc_Anaerolineae	unc_Anaerolineae	unc_Anaerolineae	OTU_1270 (unc_Anaerolineae)
OTU_6421	Bacteria	Actinobacteria	Thermoleophilia	Solirubrobacterales	unc_Solirubrobacterales	unc_Solirubrobacterales	OTU_6421 (unc_Solirubrobacterales)
OTU_8886	Bacteria	Firmicutes	Clostridia	Clostridiales	Peptostreptococcaceae	Terrisporobacter	OTU_8886 (unc_Terrisporobacter)
OTU_3564	Bacteria	Verrucomicrobia	Spartobacteria	Spartobacteria_genera_incertae_sedis	Spartobacteria_genera_incertae_sedis	Spartobacteria_genera_incertae_sedis	OTU_3564 (unc_Spartobacteria_genera_incertae_sedis)
OTU_786	Bacteria	Acidobacteria	Acidobacteria_Gp3	Gp3	Gp3	Gp3	OTU_786 (unc_Gp3)
OTU_873	Bacteria	unc_Bacteria	unc_Bacteria	unc_Bacteria	unc_Bacteria	unc_Bacteria	OTU_873 (unc_Bacteria)
OTU_3113	Bacteria	Proteobacteria	Alphaproteobacteria	Rhodobacterales	Rhodobacteraceae	unc_Rhodobacteraceae	OTU_3113 (unc_Rhodobacteraceae)
OTU_1919	Bacteria	Actinobacteria	unc_Actinobacteria	unc_Actinobacteria	unc_Actinobacteria	unc_Actinobacteria	OTU_1919 (unc_Actinobacteria)
OTU_1674	Bacteria	unc_Bacteria	unc_Bacteria	unc_Bacteria	unc_Bacteria	unc_Bacteria	OTU_1674 (unc_Bacteria)
OTU_580	Bacteria	Firmicutes	unc_Firmicutes	unc_Firmicutes	unc_Firmicutes	unc_Firmicutes	OTU_580 (unc_Firmicutes)
OTU_822	Bacteria	Gemmatimonadetes	Gemmatimonadetes	Gemmatimonadales	Gemmatimonadaceae	unc_Gemmatimonadaceae	OTU_822 (unc_Gemmatimonadaceae)
OTU_2365	Bacteria	Gemmatimonadetes	unc_Gemmatimonadetes	unc_Gemmatimonadetes	unc_Gemmatimonadetes	unc_Gemmatimonadetes	OTU_2365 (unc_Gemmatimonadetes)
OTU_1454	Bacteria	unc_Bacteria	unc_Bacteria	unc_Bacteria	unc_Bacteria	unc_Bacteria	OTU_1454 (unc_Bacteria)
OTU_1330	Bacteria	Proteobacteria	Alphaproteobacteria	Rhodospirillales	unc_Rhodospirillales	unc_Rhodospirillales	OTU_1330 (unc_Rhodospirillales)
OTU_10125	Bacteria	Proteobacteria	Betaproteobacteria	Burkholderiales	Oxalobacteraceae	unc_Oxalobacteraceae	OTU_10125 (unc_Oxalobacteraceae)
OTU_1642	Bacteria	Acidobacteria	Acidobacteria_Gp6	Gp6	Gp6	Gp6	OTU_1642 (unc_Gp6)
OTU_2591	Bacteria	unc_Bacteria	unc_Bacteria	unc_Bacteria	unc_Bacteria	unc_Bacteria	OTU_2591 (unc_Bacteria)
OTU_1563	Bacteria	unc_Bacteria	unc_Bacteria	unc_Bacteria	unc_Bacteria	unc_Bacteria	OTU_1563 (unc_Bacteria)
OTU_1921	Bacteria	unc_Bacteria	unc_Bacteria	unc_Bacteria	unc_Bacteria	unc_Bacteria	OTU_1921 (unc_Bacteria)
OTU_1318	Bacteria	Acidobacteria	Acidobacteria_Gp2	Gp2	Gp2	Gp2	OTU_1318 (unc_Gp2)
OTU_6818	Bacteria	Gemmatimonadetes	Gemmatimonadetes	Gemmatimonadales	Gemmatimonadaceae	unc_Gemmatimonadaceae	OTU_6818 (unc_Gemmatimonadaceae)
OTU_1126	Bacteria	Candidatus Saccharibacteria	Saccharibacteria_genera_incertae_sedis	Saccharibacteria_genera_incertae_sedis	Saccharibacteria_genera_incertae_sedis	Saccharibacteria_genera_incertae_sedis	OTU_1126 (unc_Saccharibacteria_genera_incertae_sedis)
OTU_5266	Bacteria	unc_Bacteria	unc_Bacteria	unc_Bacteria	unc_Bacteria	unc_Bacteria	OTU_5266 (unc_Bacteria)
OTU_1817	Bacteria	unc_Bacteria	unc_Bacteria	unc_Bacteria	unc_Bacteria	unc_Bacteria	OTU_1817 (unc_Bacteria)
OTU_1134	Bacteria	Acidobacteria	Acidobacteria_Gp4	Gp4	Gp4	Gp4	OTU_1134 (unc_Gp4)
OTU_1723	Bacteria	Proteobacteria	Gammaproteobacteria	Xanthomonadales	Rhodanobacteraceae	Pseudofulvimonas	OTU_1723 (Pseudofulvimonas_gallinarii)
OTU_4265	Bacteria	Proteobacteria	Deltaproteobacteria	Myxococcales	Polyangiaceae	unc_Polyangiaceae	OTU_4265 (unc_Polyangiaceae)
OTU_496	Bacteria	Acidobacteria	Acidobacteria_Gp6	Gp6	Gp6	Gp6	OTU_496 (unc_Gp6)
OTU_588	Bacteria	Chloroflexi	Thermomicrobia	Sphaerobacterales	Sphaerobacteraceae	unc_Sphaerobacteraceae	OTU_588 (unc_Sphaerobacteraceae)
OTU_1279	Bacteria	Actinobacteria	Acidimicrobiia	Acidimicrobiales	Iamiaceae	Actinomarinicola	OTU_1279 (unc_Actinomarinicola)
OTU_2306	Bacteria	Chloroflexi	Anaerolineae	unc_Anaerolineae	unc_Anaerolineae	unc_Anaerolineae	OTU_2306 (unc_Anaerolineae)
OTU_1647	Bacteria	Chloroflexi	unc_Chloroflexi	unc_Chloroflexi	unc_Chloroflexi	unc_Chloroflexi	OTU_1647 (unc_Chloroflexi)
OTU_3035	Bacteria	Actinobacteria	Thermoleophilia	Solirubrobacterales	unc_Solirubrobacterales	unc_Solirubrobacterales	OTU_3035 (unc_Solirubrobacterales)
OTU_968	Bacteria	Chloroflexi	unc_Chloroflexi	unc_Chloroflexi	unc_Chloroflexi	unc_Chloroflexi	OTU_968 (unc_Chloroflexi)
OTU_6933	Bacteria	Acidobacteria	Acidobacteria_Gp6	Gp6	Gp6	Gp6	OTU_6933 (unc_Gp6)
OTU_4652	Bacteria	Actinobacteria	Thermoleophilia	Solirubrobacterales	unc_Solirubrobacterales	unc_Solirubrobacterales	OTU_4652 (unc_Solirubrobacterales)
OTU_4396	Bacteria	Proteobacteria	Alphaproteobacteria	Caulobacterales	Caulobacteraceae	Phenylobacterium	OTU_4396 (unc_Phenylobacterium)
OTU_5705	Bacteria	Acidobacteria	Acidobacteria_Gp7	Gp7	Gp7	Gp7	OTU_5705 (unc_Gp7)
OTU_2066	Bacteria	Acidobacteria	Acidobacteria	unc_Acidobacteria	unc_Acidobacteria	Gp6	OTU_2066 (unc_Gp6)
OTU_3260	Bacteria	Actinobacteria	Actinobacteria	Micromonosporales	Micromonosporaceae	Allocatelliglobosispora	OTU_3260 (Allocatelliglobosispora_scoriae)
OTU_9111	Bacteria	Actinobacteria	Thermoleophilia	Solirubrobacterales	unc_Solirubrobacterales	unc_Solirubrobacterales	OTU_9111 (unc_Solirubrobacterales)
OTU_1167	Bacteria	Gemmatimonadetes	Gemmatimonadetes	Gemmatimonadales	Gemmatimonadaceae	unc_Gemmatimonadaceae	OTU_1167 (unc_Gemmatimonadaceae)
OTU_3372	Bacteria	Chloroflexi	Chloroflexia	Kallotenuales	Kallotenuaceae	Kallotenue	OTU_3372 (unc_Kallotenue)
OTU_1165	Bacteria	Proteobacteria	Deltaproteobacteria	Desulfuromonadales	Geobacteraceae	Geomonas	OTU_1165 (unc_Geomonas)
OTU_1135	Bacteria	Acidobacteria	Acidobacteria_Gp3	Gp3	Gp3	Gp3	OTU_1135 (unc_Gp3)
OTU_1417	Bacteria	unc_Bacteria	unc_Bacteria	unc_Bacteria	unc_Bacteria	unc_Bacteria	OTU_1417 (unc_Bacteria)
OTU_2205	Bacteria	Firmicutes	Negativicutes	Selenomonadales	Sporomusaceae	Sporomusa	OTU_2205 (unc_Sporomusa)
OTU_9692	Bacteria	Proteobacteria	Betaproteobacteria	Burkholderiales	Comamonadaceae	unc_Comamonadaceae	OTU_9692 (unc_Comamonadaceae)
OTU_3769	Bacteria	Bacteroidetes	Cytophagia	Cytophagales	Hymenobacteraceae	Hymenobacter	OTU_3769 (unc_Hymenobacter)
OTU_3954	Bacteria	Firmicutes	Bacilli	Bacillales	Paenibacillaceae1	Paenibacillus	OTU_3954 (unc_Paenibacillus)
OTU_1799	Bacteria	Acidobacteria	Acidobacteria_Gp6	Gp6	Gp6	Gp6	OTU_1799 (unc_Gp6)
OTU_719	Bacteria	Proteobacteria	Alphaproteobacteria	Rhodobacterales	Rhodobacteraceae	Paracoccus	OTU_719 (unc_Paracoccus)
OTU_1619	Bacteria	Acidobacteria	Acidobacteria_Gp3	Gp3	Gp3	Gp3	OTU_1619 (unc_Gp3)
OTU_4410	Bacteria	Proteobacteria	Gammaproteobacteria	Nevskiales	unc_Nevskiales	unc_Nevskiales	OTU_4410 (unc_Nevskiales)
OTU_2296	Bacteria	Bacteroidetes	Chitinophagia	Chitinophagales	Chitinophagaceae	Niastella	OTU_2296 (unc_Niastella)
OTU_3395	Bacteria	unc_Bacteria	unc_Bacteria	unc_Bacteria	unc_Bacteria	unc_Bacteria	OTU_3395 (unc_Bacteria)
OTU_2546	Bacteria	Acidobacteria	Acidobacteria_Gp6	Gp6	Gp6	Gp6	OTU_2546 (unc_Gp6)
OTU_1385	Bacteria	Acidobacteria	Acidobacteria	unc_Acidobacteria	unc_Acidobacteria	unc_Acidobacteria	OTU_1385 (unc_Acidobacteria)
OTU_1293	Bacteria	unc_Bacteria	unc_Bacteria	unc_Bacteria	unc_Bacteria	unc_Bacteria	OTU_1293 (unc_Bacteria)
OTU_1628	Bacteria	Proteobacteria	Deltaproteobacteria	Myxococcales	Myxococcaceae	Aggregicoccus	OTU_1628 (unc_Aggregicoccus)
OTU_2381	Bacteria	Bacteroidetes	Cytophagia	Cytophagales	Hymenobacteraceae	Nibribacter	OTU_2381 (Nibribacter_koreensis)
OTU_3031	Bacteria	Actinobacteria	Thermoleophilia	Gaiellales	Gaiellaceae	Gaiella	OTU_3031 (unc_Gaiella)
OTU_2213	Bacteria	Proteobacteria	Betaproteobacteria	unc_Betaproteobacteria	unc_Betaproteobacteria	unc_Betaproteobacteria	OTU_2213 (unc_Betaproteobacteria)
OTU_5256	Bacteria	Proteobacteria	Deltaproteobacteria	Myxococcales	Phaselicystidaceae	Phaselicystis	OTU_5256 (unc_Phaselicystis)
OTU_1295	Bacteria	Acidobacteria	Acidobacteria_Gp25	Gp25	Gp25	Gp25	OTU_1295 (unc_Gp25)
OTU_2203	Bacteria	Acidobacteria	Acidobacteria_Gp6	Gp6	Gp6	Gp6	OTU_2203 (unc_Gp6)
OTU_1733	Bacteria	unc_Bacteria	unc_Bacteria	unc_Bacteria	unc_Bacteria	unc_Bacteria	OTU_1733 (unc_Bacteria)
OTU_554	Bacteria	Chloroflexi	Thermomicrobia	Sphaerobacterales	Sphaerobacteraceae	unc_Sphaerobacteraceae	OTU_554 (unc_Sphaerobacteraceae)
OTU_4228	Bacteria	Gemmatimonadetes	Gemmatimonadetes	Gemmatimonadales	Gemmatimonadaceae	Gemmatimonas	OTU_4228 (unc_Gemmatimonas)
OTU_2916	Bacteria	Gemmatimonadetes	Gemmatimonadetes	Gemmatimonadales	Gemmatimonadaceae	unc_Gemmatimonadaceae	OTU_2916 (unc_Gemmatimonadaceae)
OTU_1658	Bacteria	Actinobacteria	Actinobacteria	Micrococcales	Demequinaceae	Demequina	OTU_1658 (unc_Demequina)
OTU_1314	Bacteria	unc_Bacteria	unc_Bacteria	unc_Bacteria	unc_Bacteria	unc_Bacteria	OTU_1314 (unc_Bacteria)
OTU_3022	Bacteria	Actinobacteria	unc_Actinobacteria	unc_Actinobacteria	unc_Actinobacteria	unc_Actinobacteria	OTU_3022 (unc_Actinobacteria)
OTU_1542	Bacteria	Bacteroidetes	Chitinophagia	Chitinophagales	Chitinophagaceae	unc_Chitinophagaceae	OTU_1542 (unc_Chitinophagaceae)
OTU_1962	Bacteria	Acidobacteria	Acidobacteria_Gp16	Gp16	Gp16	Gp16	OTU_1962 (unc_Gp16)
OTU_2440	Bacteria	Actinobacteria	Actinobacteria	unc_Actinobacteria	unc_Actinobacteria	unc_Actinobacteria	OTU_2440 (unc_Actinobacteria)
OTU_3640	Bacteria	Actinobacteria	Actinobacteria	unc_Actinobacteria	unc_Actinobacteria	unc_Actinobacteria	OTU_3640 (unc_Actinobacteria)
OTU_2757	Bacteria	Actinobacteria	Actinobacteria	unc_Actinobacteria	unc_Actinobacteria	unc_Actinobacteria	OTU_2757 (unc_Actinobacteria)
OTU_1159	Bacteria	unc_Bacteria	unc_Bacteria	unc_Bacteria	unc_Bacteria	unc_Bacteria	OTU_1159 (unc_Bacteria)
OTU_9273	Bacteria	unc_Bacteria	unc_Bacteria	unc_Bacteria	unc_Bacteria	unc_Bacteria	OTU_9273 (unc_Bacteria)
OTU_2271	Bacteria	Acidobacteria	Acidobacteria_Gp17	Gp17	Gp17	Gp17	OTU_2271 (unc_Gp17)
OTU_3703	Bacteria	Acidobacteria	Acidobacteria	unc_Acidobacteria	unc_Acidobacteria	Gp16	OTU_3703 (uncultured_Acidobacteria)
OTU_1837	Bacteria	unc_Bacteria	unc_Bacteria	unc_Bacteria	unc_Bacteria	unc_Bacteria	OTU_1837 (unc_Bacteria)
OTU_519	Bacteria	Gemmatimonadetes	Gemmatimonadetes	Gemmatimonadales	Gemmatimonadaceae	unc_Gemmatimonadaceae	OTU_519 (unc_Gemmatimonadaceae)
OTU_2663	Bacteria	unc_Bacteria	unc_Bacteria	unc_Bacteria	unc_Bacteria	unc_Bacteria	OTU_2663 (unc_Bacteria)
OTU_644	Bacteria	Proteobacteria	Alphaproteobacteria	Rhizobiales	Alsobacteraceae	Alsobacter	OTU_644 (unc_Alsobacter)
OTU_1242	Bacteria	Proteobacteria	Alphaproteobacteria	Caulobacterales	Hyphomonadaceae	Asprobacter	OTU_1242 (unc_Asprobacter)
OTU_8220	Bacteria	Proteobacteria	Gammaproteobacteria	Xanthomonadales	Xanthomonadaceae	Arenimonas	OTU_8220 (unc_Arenimonas)
OTU_6122	Bacteria	unc_Bacteria	unc_Bacteria	unc_Bacteria	unc_Bacteria	unc_Bacteria	OTU_6122 (unc_Bacteria)
OTU_4025	Bacteria	Proteobacteria	Deltaproteobacteria	Myxococcales	Kofleriaceae	Kofleria	OTU_4025 (unc_Kofleria)
OTU_3805	Bacteria	unc_Bacteria	unc_Bacteria	unc_Bacteria	unc_Bacteria	unc_Bacteria	OTU_3805 (unc_Bacteria)
OTU_3456	Bacteria	unc_Bacteria	unc_Bacteria	unc_Bacteria	unc_Bacteria	unc_Bacteria	OTU_3456 (unc_Bacteria)
OTU_5165	Bacteria	Acidobacteria	Acidobacteria_Gp6	Gp6	Gp6	Gp6	OTU_5165 (unc_Gp6)
OTU_1265	Bacteria	Acidobacteria	Acidobacteria_Gp6	Gp6	Gp6	Gp6	OTU_1265 (unc_Gp6)
OTU_4123	Bacteria	Actinobacteria	Acidimicrobiia	Acidimicrobiales	unc_Acidimicrobiales	unc_Acidimicrobiales	OTU_4123 (unc_Acidimicrobiales)
OTU_1877	Bacteria	Proteobacteria	Deltaproteobacteria	Myxococcales	unc_Myxococcales	unc_Myxococcales	OTU_1877 (unc_Myxococcales)
OTU_3165	Bacteria	Proteobacteria	Betaproteobacteria	Burkholderiales	Comamonadaceae	unc_Comamonadaceae	OTU_3165 (unc_Comamonadaceae)
OTU_820	Bacteria	Proteobacteria	Alphaproteobacteria	Sphingomonadales	Erythrobacteraceae	Novosphingobium	OTU_820 (unc_Novosphingobium)
OTU_5353	Bacteria	Verrucomicrobia	Subdivision3	Subdivision3_genera_incertae_sedis	Subdivision3_genera_incertae_sedis	Subdivision3_genera_incertae_sedis	OTU_5353 (unc_Subdivision3_genera_incertae_sedis)
OTU_1530	Bacteria	Proteobacteria	Betaproteobacteria	unc_Betaproteobacteria	unc_Betaproteobacteria	unc_Betaproteobacteria	OTU_1530 (unc_Betaproteobacteria)
OTU_2706	Bacteria	Actinobacteria	unc_Actinobacteria	unc_Actinobacteria	unc_Actinobacteria	unc_Actinobacteria	OTU_2706 (unc_Actinobacteria)
OTU_1709	Bacteria	unc_Bacteria	unc_Bacteria	unc_Bacteria	unc_Bacteria	unc_Bacteria	OTU_1709 (unc_Bacteria)
OTU_7113	Bacteria	Actinobacteria	unc_Actinobacteria	unc_Actinobacteria	unc_Actinobacteria	unc_Actinobacteria	OTU_7113 (unc_Actinobacteria)
OTU_9934	Bacteria	Chloroflexi	Anaerolineae	Anaerolineales	Anaerolineaceae	unc_Anaerolineaceae	OTU_9934 (unc_Anaerolineaceae)
OTU_3394	Bacteria	Acidobacteria	Acidobacteria_Gp10	Gp10	Gp10	Gp10	OTU_3394 (unc_Gp10)
OTU_4600	Bacteria	Actinobacteria	Actinobacteria	Propionibacteriales	Nocardioidaceae	Nocardioides	OTU_4600 (unc_Nocardioides)
OTU_2428	Bacteria	Chloroflexi	Chloroflexia	Kallotenuales	Kallotenuaceae	Kallotenue	OTU_2428 (unc_Kallotenue)
OTU_6981	Bacteria	Latescibacteria	Latescibacteria_genera_incertae_sedis	Latescibacteria_genera_incertae_sedis	Latescibacteria_genera_incertae_sedis	Latescibacteria_genera_incertae_sedis	OTU_6981 (unc_Latescibacteria_genera_incertae_sedis)
OTU_1206	Bacteria	Acidobacteria	Acidobacteria_Gp1	Gp1	Gp1	Gp1	OTU_1206 (unc_Gp1)
OTU_1666	Bacteria	Acidobacteria	Acidobacteria_Gp6	Gp6	Gp6	Gp6	OTU_1666 (unc_Gp6)
OTU_3687	Bacteria	Chloroflexi	Anaerolineae	Aggregatilineales	Aggregatilineaceae	Aggregatilinea	OTU_3687 (unc_Aggregatilinea)
OTU_1405	Bacteria	Proteobacteria	Betaproteobacteria	Burkholderiales	unc_Burkholderiales	unc_Burkholderiales	OTU_1405 (unc_Burkholderiales)
OTU_1554	Bacteria	Firmicutes	Bacilli	Bacillales	Paenibacillaceae1	Paenibacillus	OTU_1554 (Paenibacillus_baekrokdamisoli)
OTU_2182	Bacteria	unc_Bacteria	unc_Bacteria	unc_Bacteria	unc_Bacteria	unc_Bacteria	OTU_2182 (unc_Bacteria)
OTU_2146	Bacteria	Actinobacteria	Thermoleophilia	Solirubrobacterales	unc_Solirubrobacterales	unc_Solirubrobacterales	OTU_2146 (unc_Solirubrobacterales)
OTU_1053	Bacteria	unc_Bacteria	unc_Bacteria	unc_Bacteria	unc_Bacteria	unc_Bacteria	OTU_1053 (unc_Bacteria)
OTU_3225	Bacteria	Acidobacteria	Blastocatellia	Blastocatellales	Arenimicrobiaceae	Arenimicrobium	OTU_3225 (unc_Arenimicrobium)
OTU_2812	Bacteria	Planctomycetes	Planctomycetacia	Planctomycetales	Isosphaeraceae	unc_Isosphaeraceae	OTU_2812 (unc_Isosphaeraceae)
OTU_1579	Bacteria	Proteobacteria	Deltaproteobacteria	Myxococcales	Kofleriaceae	Kofleria	OTU_1579 (unc_Kofleria)
OTU_2502	Bacteria	Firmicutes	Bacilli	Bacillales	Bacillaceae2	unc_Bacillaceae2	OTU_2502 (unc_Bacillaceae2)
OTU_1978	Bacteria	Proteobacteria	Deltaproteobacteria	Bdellovibrionales	Bdellovibrionaceae	Vampirovibrio	OTU_1978 (unc_Vampirovibrio)
OTU_5663	Bacteria	Proteobacteria	Alphaproteobacteria	Rhodospirillales	Geminicoccaceae	Arboricoccus	OTU_5663 (Arboricoccus_pini)
OTU_3530	Bacteria	Firmicutes	Bacilli	Bacillales	Paenibacillaceae1	unc_Paenibacillaceae1	OTU_3530 (unc_Paenibacillaceae1)
OTU_1954	Bacteria	Actinobacteria	Actinobacteria	Propionibacteriales	Nocardioidaceae	Nocardioides	OTU_1954 (Nocardioides_dilutus)
OTU_1421	Bacteria	Acidobacteria	Acidobacteria_Gp16	Gp16	Gp16	Gp16	OTU_1421 (unc_Gp16)
OTU_2574	Bacteria	Actinobacteria	Thermoleophilia	Gaiellales	Gaiellaceae	Gaiella	OTU_2574 (Gaiella_occulta)
OTU_3713	Bacteria	Proteobacteria	Betaproteobacteria	unc_Betaproteobacteria	unc_Betaproteobacteria	unc_Betaproteobacteria	OTU_3713 (unc_Betaproteobacteria)
OTU_7731	Bacteria	Actinobacteria	Actinobacteria	Mycobacteriales	unc_Mycobacteriales	unc_Mycobacteriales	OTU_7731 (unc_Mycobacteriales)
OTU_2189	Bacteria	Chloroflexi	Caldilineae	Caldilineales	Caldilineaceae	unc_Caldilineaceae	OTU_2189 (unc_Caldilineaceae)
OTU_1256	Bacteria	unc_Bacteria	unc_Bacteria	unc_Bacteria	unc_Bacteria	unc_Bacteria	OTU_1256 (unc_Bacteria)
OTU_1451	Bacteria	Acidobacteria	Acidobacteria_Gp25	Gp25	Gp25	Gp25	OTU_1451 (unc_Gp25)
OTU_2250	Bacteria	Firmicutes	Bacilli	Bacillales	Paenibacillaceae1	Paenibacillus	OTU_2250 (unc_Paenibacillus)
OTU_575	Bacteria	Acidobacteria	Acidobacteria_Gp6	Gp6	Gp6	Gp6	OTU_575 (unc_Gp6)
OTU_9865	Bacteria	Actinobacteria	Actinobacteria	Mycobacteriales	Mycobacteriaceae	Mycobacterium	OTU_9865 (unc_Mycobacterium)
OTU_4543	Bacteria	Gemmatimonadetes	Gemmatimonadetes	Gemmatimonadales	Gemmatimonadaceae	Roseisolibacter	OTU_4543 (unc_Roseisolibacter)
OTU_2225	Bacteria	unc_Bacteria	unc_Bacteria	unc_Bacteria	unc_Bacteria	unc_Bacteria	OTU_2225 (unc_Bacteria)
OTU_7758	Bacteria	Firmicutes	Bacilli	Bacillales	Bacillaceae1	Bacillus	OTU_7758 (unc_Bacillus)
OTU_2384	Bacteria	Acidobacteria	Acidobacteria_Gp6	Gp6	Gp6	Gp6	OTU_2384 (unc_Gp6)
OTU_3083	Bacteria	Acidobacteria	Acidobacteria_Gp10	Gp10	Gp10	Gp10	OTU_3083 (unc_Gp10)
OTU_1742	Bacteria	Chloroflexi	unc_Chloroflexi	unc_Chloroflexi	unc_Chloroflexi	unc_Chloroflexi	OTU_1742 (unc_Chloroflexi)
OTU_485	Bacteria	Actinobacteria	Thermoleophilia	Gaiellales	Gaiellaceae	Gaiella	OTU_485 (unc_Gaiella)
OTU_1612	Bacteria	Actinobacteria	Actinobacteria	unc_Actinobacteria	unc_Actinobacteria	unc_Actinobacteria	OTU_1612 (unc_Actinobacteria)
OTU_1950	Bacteria	unc_Bacteria	unc_Bacteria	unc_Bacteria	unc_Bacteria	unc_Bacteria	OTU_1950 (unc_Bacteria)
OTU_5968	Bacteria	Proteobacteria	Betaproteobacteria	Burkholderiales	Oxalobacteraceae	Noviherbaspirillum	OTU_5968 (unc_Noviherbaspirillum)
OTU_5090	Bacteria	Bacteroidetes	Sphingobacteriia	Sphingobacteriales	Sphingobacteriaceae	Daejeonella	OTU_5090 (unc_Daejeonella)
OTU_656	Bacteria	Actinobacteria	Actinobacteria	Micrococcales	Intrasporangiaceae	Ornithinibacter	OTU_656 (unc_Ornithinibacter)
OTU_2117	Bacteria	Proteobacteria	Betaproteobacteria	Burkholderiales	unc_Burkholderiales	unc_Burkholderiales	OTU_2117 (unc_Burkholderiales)
OTU_386	Bacteria	Proteobacteria	Alphaproteobacteria	Rhizobiales	Devosiaceae	Devosia	OTU_386 (unc_Devosia)
OTU_4933	Bacteria	Verrucomicrobia	Subdivision3	Subdivision3_genera_incertae_sedis	Subdivision3_genera_incertae_sedis	Subdivision3_genera_incertae_sedis	OTU_4933 (unc_Subdivision3_genera_incertae_sedis)
OTU_1875	Bacteria	Acidobacteria	Acidobacteria_Gp25	Gp25	Gp25	Gp25	OTU_1875 (unc_Gp25)
OTU_3205	Bacteria	Acidobacteria	Acidobacteria_Gp6	Gp6	Gp6	Gp6	OTU_3205 (unc_Gp6)
OTU_1706	Bacteria	Proteobacteria	Deltaproteobacteria	Myxococcales	unc_Myxococcales	unc_Myxococcales	OTU_1706 (unc_Myxococcales)
OTU_1687	Bacteria	Gemmatimonadetes	Gemmatimonadetes	Gemmatimonadales	Gemmatimonadaceae	unc_Gemmatimonadaceae	OTU_1687 (unc_Gemmatimonadaceae)
OTU_2541	Bacteria	unc_Bacteria	unc_Bacteria	unc_Bacteria	unc_Bacteria	unc_Bacteria	OTU_2541 (unc_Bacteria)
OTU_657	Bacteria	Actinobacteria	Actinobacteria	unc_Actinobacteria	unc_Actinobacteria	unc_Actinobacteria	OTU_657 (unc_Actinobacteria)
OTU_8004	Bacteria	Acidobacteria	Acidobacteria_Gp6	Gp6	Gp6	Gp6	OTU_8004 (unc_Gp6)
OTU_7440	Bacteria	Proteobacteria	Deltaproteobacteria	Myxococcales	Kofleriaceae	Kofleria	OTU_7440 (unc_Kofleria)
OTU_1803	Bacteria	candidate division WPS-2	WPS-2_genera_incertae_sedis	WPS-2_genera_incertae_sedis	WPS-2_genera_incertae_sedis	WPS-2_genera_incertae_sedis	OTU_1803 (unc_WPS-2_genera_incertae_sedis)
OTU_1859	Bacteria	Chloroflexi	unc_Chloroflexi	unc_Chloroflexi	unc_Chloroflexi	unc_Chloroflexi	OTU_1859 (unc_Chloroflexi)
OTU_2938	Bacteria	Firmicutes	Clostridia	Clostridiales	Lachnospiraceae	Anaerocolumna	OTU_2938 (unc_Anaerocolumna)
OTU_2082	Bacteria	Actinobacteria	unc_Actinobacteria	unc_Actinobacteria	unc_Actinobacteria	unc_Actinobacteria	OTU_2082 (unc_Actinobacteria)
OTU_2078	Bacteria	Acidobacteria	Acidobacteria	unc_Acidobacteria	unc_Acidobacteria	Gp4	OTU_2078 (uncultured_soil)
OTU_1501	Bacteria	Proteobacteria	Alphaproteobacteria	Rhodospirillales	Geminicoccaceae	Geminicoccus	OTU_1501 (Geminicoccus_roseus)
OTU_2399	Bacteria	Acidobacteria	Acidobacteria_Gp4	Gp4	Gp4	Gp4	OTU_2399 (unc_Gp4)
OTU_9123	Bacteria	Firmicutes	Bacilli	Bacillales	Planococcaceae	unc_Planococcaceae	OTU_9123 (unc_Planococcaceae)
OTU_9136	Bacteria	Actinobacteria	Actinobacteria	Streptosporangiales	Thermomonosporaceae	unc_Thermomonosporaceae	OTU_9136 (unc_Thermomonosporaceae)
OTU_1769	Bacteria	unc_Bacteria	unc_Bacteria	unc_Bacteria	unc_Bacteria	unc_Bacteria	OTU_1769 (unc_Bacteria)
OTU_764	Bacteria	Firmicutes	Bacilli	Bacillales	Planococcaceae	Ureibacillus	OTU_764 (Ureibacillus_thermosphaericus)
OTU_3932	Bacteria	Acidobacteria	Acidobacteria_Gp6	Gp6	Gp6	Gp6	OTU_3932 (unc_Gp6)
OTU_1524	Bacteria	Actinobacteria	Actinobacteria	Pseudonocardiales	Pseudonocardiaceae	Actinomycetospora	OTU_1524 (unc_Actinomycetospora)
OTU_2994	Bacteria	Proteobacteria	Betaproteobacteria	unc_Betaproteobacteria	unc_Betaproteobacteria	unc_Betaproteobacteria	OTU_2994 (unc_Betaproteobacteria)
OTU_1711	Bacteria	Actinobacteria	Actinobacteria	Propionibacteriales	Propionibacteriaceae	Microlunatus	OTU_1711 (unc_Microlunatus)
OTU_2837	Bacteria	Bacteroidetes	Chitinophagia	Chitinophagales	Chitinophagaceae	Segetibacter	OTU_2837 (unc_Segetibacter)
OTU_1933	Bacteria	unc_Bacteria	unc_Bacteria	unc_Bacteria	unc_Bacteria	unc_Bacteria	OTU_1933 (unc_Bacteria)
OTU_481	Bacteria	unc_Bacteria	unc_Bacteria	unc_Bacteria	unc_Bacteria	unc_Bacteria	OTU_481 (unc_Bacteria)
OTU_6918	Bacteria	Acidobacteria	Acidobacteria_Gp7	Gp7	Gp7	Gp7	OTU_6918 (unc_Gp7)
OTU_1592	Bacteria	unc_Bacteria	unc_Bacteria	unc_Bacteria	unc_Bacteria	unc_Bacteria	OTU_1592 (unc_Bacteria)
OTU_2476	Bacteria	unc_Bacteria	unc_Bacteria	unc_Bacteria	unc_Bacteria	unc_Bacteria	OTU_2476 (unc_Bacteria)
OTU_2019	Bacteria	unc_Bacteria	unc_Bacteria	unc_Bacteria	unc_Bacteria	unc_Bacteria	OTU_2019 (unc_Bacteria)
OTU_2594	Bacteria	Verrucomicrobia	Subdivision3	Subdivision3_genera_incertae_sedis	Subdivision3_genera_incertae_sedis	Subdivision3_genera_incertae_sedis	OTU_2594 (unc_Subdivision3_genera_incertae_sedis)
OTU_3790	Bacteria	Verrucomicrobia	Verrucomicrobiae	Verrucomicrobiales	Verrucomicrobiaceae	Luteolibacter	OTU_3790 (unc_Luteolibacter)
OTU_801	Bacteria	Proteobacteria	Deltaproteobacteria	Myxococcales	unc_Myxococcales	unc_Myxococcales	OTU_801 (unc_Myxococcales)
OTU_3148	Bacteria	Chloroflexi	unc_Chloroflexi	unc_Chloroflexi	unc_Chloroflexi	unc_Chloroflexi	OTU_3148 (unc_Chloroflexi)
OTU_1893	Bacteria	Acidobacteria	Acidobacteria_Gp6	Gp6	Gp6	Gp6	OTU_1893 (unc_Gp6)
OTU_1746	Bacteria	Proteobacteria	Alphaproteobacteria	Rhizobiales	unc_Rhizobiales	unc_Rhizobiales	OTU_1746 (unc_Rhizobiales)
OTU_2230	Bacteria	unc_Bacteria	unc_Bacteria	unc_Bacteria	unc_Bacteria	unc_Bacteria	OTU_2230 (unc_Bacteria)
OTU_4760	Bacteria	unc_Bacteria	unc_Bacteria	unc_Bacteria	unc_Bacteria	unc_Bacteria	OTU_4760 (unc_Bacteria)
OTU_1735	Bacteria	Firmicutes	Bacilli	Bacillales	Thermoactinomycetaceae 1	unc_Thermoactinomycetaceae 1	OTU_1735 (unc_Thermoactinomycetaceae 1)
OTU_2544	Bacteria	Actinobacteria	Thermoleophilia	Gaiellales	Gaiellaceae	Gaiella	OTU_2544 (unc_Gaiella)
OTU_2811	Bacteria	Proteobacteria	Deltaproteobacteria	unc_Deltaproteobacteria	unc_Deltaproteobacteria	unc_Deltaproteobacteria	OTU_2811 (unc_Deltaproteobacteria)
OTU_1163	Bacteria	Proteobacteria	Alphaproteobacteria	unc_Alphaproteobacteria	unc_Alphaproteobacteria	unc_Alphaproteobacteria	OTU_1163 (unc_Alphaproteobacteria)
OTU_9303	Bacteria	Acidobacteria	Acidobacteria_Gp16	Gp16	Gp16	Gp16	OTU_9303 (unc_Gp16)
OTU_2283	Bacteria	Proteobacteria	Betaproteobacteria	Burkholderiales	Burkholderiaceae	unc_Burkholderiaceae	OTU_2283 (unc_Burkholderiaceae)
OTU_916	Bacteria	Actinobacteria	Thermoleophilia	Gaiellales	Gaiellaceae	Gaiella	OTU_916 (unc_Gaiella)
OTU_1866	Bacteria	Proteobacteria	Deltaproteobacteria	unc_Deltaproteobacteria	unc_Deltaproteobacteria	unc_Deltaproteobacteria	OTU_1866 (unc_Deltaproteobacteria)
OTU_7526	Bacteria	Proteobacteria	Alphaproteobacteria	Rhodospirillales	Geminicoccaceae	Geminicoccus	OTU_7526 (Geminicoccus_roseus)
OTU_1833	Bacteria	Firmicutes	Bacilli	Bacillales	Paenibacillaceae1	Paenibacillus	OTU_1833 (unc_Paenibacillus)
OTU_2605	Bacteria	Actinobacteria	Acidimicrobiia	Acidimicrobiales	unc_Acidimicrobiales	unc_Acidimicrobiales	OTU_2605 (unc_Acidimicrobiales)
OTU_1975	Bacteria	Actinobacteria	Thermoleophilia	Solirubrobacterales	unc_Solirubrobacterales	unc_Solirubrobacterales	OTU_1975 (unc_Solirubrobacterales)
OTU_8058	Bacteria	Acidobacteria	Acidobacteria_Gp6	Gp6	Gp6	Gp6	OTU_8058 (unc_Gp6)
OTU_3685	Bacteria	Proteobacteria	Deltaproteobacteria	Myxococcales	Kofleriaceae	Kofleria	OTU_3685 (unc_Kofleria)
OTU_2385	Bacteria	Armatimonadetes	Chthonomonadetes	Chthonomonadales	Chthonomonadaceae	Chthonomonas/Armatimonadetes_gp3	OTU_2385 (unc_Chthonomonas/Armatimonadetes_gp3)
OTU_1608	Bacteria	Chloroflexi	Anaerolineae	Anaerolineales	Anaerolineaceae	unc_Anaerolineaceae	OTU_1608 (unc_Anaerolineaceae)
OTU_1878	Bacteria	Acidobacteria	Acidobacteria_Gp3	Gp3	Gp3	Gp3	OTU_1878 (unc_Gp3)
OTU_4381	Bacteria	Proteobacteria	Betaproteobacteria	unc_Betaproteobacteria	unc_Betaproteobacteria	unc_Betaproteobacteria	OTU_4381 (unc_Betaproteobacteria)
OTU_2197	Bacteria	Planctomycetes	Planctomycetacia	Planctomycetales	unc_Planctomycetales	unc_Planctomycetales	OTU_2197 (unc_Planctomycetales)
OTU_2183	Bacteria	Proteobacteria	Deltaproteobacteria	unc_Deltaproteobacteria	unc_Deltaproteobacteria	unc_Deltaproteobacteria	OTU_2183 (unc_Deltaproteobacteria)
OTU_1611	Bacteria	Firmicutes	Bacilli	Bacillales	Alicyclobacillaceae	Tumebacillus	OTU_1611 (unc_Tumebacillus)
OTU_6987	Bacteria	Actinobacteria	Acidimicrobiia	Acidimicrobiales	Iamiaceae	unc_Iamiaceae	OTU_6987 (unc_Iamiaceae)
OTU_134	Bacteria	Actinobacteria	Acidimicrobiia	Acidimicrobiales	unc_Acidimicrobiales	unc_Acidimicrobiales	OTU_134 (unc_Acidimicrobiales)
OTU_735	Bacteria	Proteobacteria	Gammaproteobacteria	Pseudomonadales	Pseudomonadaceae	Pseudomonas	OTU_735 (unc_Pseudomonas)
OTU_1926	Bacteria	Proteobacteria	Deltaproteobacteria	Myxococcales	Sandaracinaceae	Sandaracinus	OTU_1926 (Sandaracinus_amylolyticus)
OTU_328	Bacteria	Actinobacteria	unc_Actinobacteria	unc_Actinobacteria	unc_Actinobacteria	unc_Actinobacteria	OTU_328 (unc_Actinobacteria)
OTU_1375	Bacteria	candidate division WPS-1	WPS-1_genera_incertae_sedis	WPS-1_genera_incertae_sedis	WPS-1_genera_incertae_sedis	WPS-1_genera_incertae_sedis	OTU_1375 (unc_WPS-1_genera_incertae_sedis)
OTU_2109	Bacteria	Chloroflexi	unc_Chloroflexi	unc_Chloroflexi	unc_Chloroflexi	unc_Chloroflexi	OTU_2109 (unc_Chloroflexi)
OTU_911	Bacteria	Proteobacteria	Alphaproteobacteria	Caulobacterales	Caulobacteraceae	Brevundimonas	OTU_911 (Brevundimonas_variabilis)
OTU_3156	Bacteria	Acidobacteria	Acidobacteria_Gp3	Gp3	Gp3	Gp3	OTU_3156 (unc_Gp3)
OTU_540	Bacteria	Firmicutes	unc_Firmicutes	unc_Firmicutes	unc_Firmicutes	unc_Firmicutes	OTU_540 (unc_Firmicutes)
OTU_699	Bacteria	Firmicutes	Bacilli	Bacillales	Thermoactinomycetaceae1	Novibacillus	OTU_699 (Novibacillus_thermophilus)
OTU_3514	Bacteria	Chloroflexi	Anaerolineae	unc_Anaerolineae	unc_Anaerolineae	unc_Anaerolineae	OTU_3514 (unc_Anaerolineae)
OTU_6544	Bacteria	Firmicutes	Bacilli	Bacillales	Planococcaceae	unc_Planococcaceae	OTU_6544 (unc_Planococcaceae)
OTU_1306	Bacteria	Bacteroidetes	Chitinophagia	Chitinophagales	Chitinophagaceae	Terrimonas	OTU_1306 (unc_Terrimonas)
OTU_1604	Bacteria	Gemmatimonadetes	Gemmatimonadetes	Gemmatimonadales	Gemmatimonadaceae	unc_Gemmatimonadaceae	OTU_1604 (unc_Gemmatimonadaceae)
OTU_761	Bacteria	Firmicutes	Clostridia	Clostridiales	Symbiobacteriaceae	Symbiobacterium	OTU_761 (Symbiobacterium_turbinis)
OTU_5781	Bacteria	Actinobacteria	Acidimicrobiia	Acidimicrobiales	Ilumatobacteraceae	Ilumatobacter	OTU_5781 (unc_Ilumatobacter)
OTU_2576	Bacteria	Proteobacteria	Gammaproteobacteria	Gammaproteobacteria_incertae	unc_Gammaproteobacteria_incertae	Acidibacter	OTU_2576 (Acidibacter_ferrireducens)
OTU_1819	Bacteria	Chloroflexi	Caldilineae	Caldilineales	Caldilineaceae	Litorilinea	OTU_1819 (unc_Litorilinea)
OTU_2061	Bacteria	Actinobacteria	Thermoleophilia	unc_Thermoleophilia	unc_Thermoleophilia	unc_Thermoleophilia	OTU_2061 (unc_Thermoleophilia)
OTU_1315	Bacteria	unc_Bacteria	unc_Bacteria	unc_Bacteria	unc_Bacteria	unc_Bacteria	OTU_1315 (unc_Bacteria)
OTU_5803	Bacteria	Acidobacteria	Acidobacteria_Gp7	Gp7	Gp7	Gp7	OTU_5803 (unc_Gp7)
OTU_3388	Bacteria	Actinobacteria	Actinobacteria	Propionibacteriales	Nocardioidaceae	Nocardioides	OTU_3388 (unc_Nocardioides)
OTU_6127	Bacteria	Acidobacteria	Acidobacteria_Gp6	Gp6	Gp6	Gp6	OTU_6127 (unc_Gp6)
OTU_2840	Bacteria	Proteobacteria	Deltaproteobacteria	Myxococcales	Sandaracinaceae	Sandaracinus	OTU_2840 (Sandaracinus_amylolyticus)
OTU_2869	Bacteria	unc_Bacteria	unc_Bacteria	unc_Bacteria	unc_Bacteria	unc_Bacteria	OTU_2869 (unc_Bacteria)
OTU_1074	Bacteria	Firmicutes	unc_Firmicutes	unc_Firmicutes	unc_Firmicutes	unc_Firmicutes	OTU_1074 (unc_Firmicutes)
OTU_1323	Bacteria	Bacteroidetes	Chitinophagia	Chitinophagales	Chitinophagaceae	Segetibacter	OTU_1323 (Segetibacter_koreensis)
OTU_8903	Bacteria	Bacteroidetes	Chitinophagia	Chitinophagales	Chitinophagaceae	unc_Chitinophagaceae	OTU_8903 (unc_Chitinophagaceae)
OTU_7008	Bacteria	Acidobacteria	Acidobacteria_Gp10	Gp10	Gp10	Gp10	OTU_7008 (unc_Gp10)
OTU_2154	Bacteria	Actinobacteria	Thermoleophilia	unc_Thermoleophilia	unc_Thermoleophilia	unc_Thermoleophilia	OTU_2154 (unc_Thermoleophilia)
OTU_245	Bacteria	Actinobacteria	Actinobacteria	Propionibacteriales	Nocardioidaceae	Nocardioides	OTU_245 (Nocardioides_halotolerans)
OTU_2943	Bacteria	Firmicutes	unc_Firmicutes	unc_Firmicutes	unc_Firmicutes	unc_Firmicutes	OTU_2943 (unc_Firmicutes)
OTU_2107	Bacteria	Gemmatimonadetes	Gemmatimonadetes	Gemmatimonadales	Gemmatimonadaceae	unc_Gemmatimonadaceae	OTU_2107 (unc_Gemmatimonadaceae)
OTU_1630	Bacteria	candidate division WPS-1	WPS-1_genera_incertae_sedis	WPS-1_genera_incertae_sedis	WPS-1_genera_incertae_sedis	WPS-1_genera_incertae_sedis	OTU_1630 (unc_WPS-1_genera_incertae_sedis)
OTU_2212	Bacteria	Gemmatimonadetes	Gemmatimonadetes	Gemmatimonadales	Gemmatimonadaceae	unc_Gemmatimonadaceae	OTU_2212 (unc_Gemmatimonadaceae)
OTU_944	Bacteria	Proteobacteria	Alphaproteobacteria	Caulobacterales	Caulobacteraceae	Brevundimonas	OTU_944 (unc_Brevundimonas)
OTU_3450	Bacteria	Actinobacteria	Acidimicrobiia	Acidimicrobiales	Iamiaceae	Actinomarinicola	OTU_3450 (Actinomarinicola_tropica)
OTU_2004	Bacteria	Proteobacteria	Deltaproteobacteria	Myxococcales	Cystobacteraceae	unc_Cystobacteraceae	OTU_2004 (unc_Cystobacteraceae)
OTU_4177	Bacteria	Acidobacteria	Acidobacteria_Gp6	Gp6	Gp6	Gp6	OTU_4177 (unc_Gp6)
OTU_3034	Bacteria	Candidatus Saccharibacteria	Saccharibacteria_genera_incertae_sedis	Saccharibacteria_genera_incertae_sedis	Saccharibacteria_genera_incertae_sedis	Saccharibacteria_genera_incertae_sedis	OTU_3034 (unc_Saccharibacteria_genera_incertae_sedis)
OTU_5363	Bacteria	Acidobacteria	Blastocatellia	Blastocatellales	Blastocatellaceae	Stenotrophobacter	OTU_5363 (Stenotrophobacter_namibiensis)
OTU_1883	Bacteria	unc_Bacteria	unc_Bacteria	unc_Bacteria	unc_Bacteria	unc_Bacteria	OTU_1883 (unc_Bacteria)
OTU_3295	Archaea	Euryarchaeota	Thermoplasmata	unc_Thermoplasmata	unc_Thermoplasmata	unc_Thermoplasmata	OTU_3295 (unc_Thermoplasmata)
OTU_343	Bacteria	Actinobacteria	Actinobacteria	unc_Actinobacteria	unc_Actinobacteria	unc_Actinobacteria	OTU_343 (unc_Actinobacteria)
OTU_215	Bacteria	Actinobacteria	Actinobacteria	Mycobacteriales	Nocardiaceae	Rhodococcus	OTU_215 (unc_Rhodococcus)
OTU_3123	Bacteria	Bacteroidetes	Chitinophagia	Chitinophagales	Chitinophagaceae	unc_Chitinophagaceae	OTU_3123 (unc_Chitinophagaceae)
OTU_2875	Bacteria	Cyanobacteria/Chloroplast	Chloroplast	Chloroplast	Chloroplast	Bacillariophyta	OTU_2875 (unc_Bacillariophyta)
OTU_9293	Bacteria	Actinobacteria	Actinobacteria	unc_Actinobacteria	unc_Actinobacteria	unc_Actinobacteria	OTU_9293 (unc_Actinobacteria)
OTU_673	Bacteria	unc_Bacteria	unc_Bacteria	unc_Bacteria	unc_Bacteria	unc_Bacteria	OTU_673 (unc_Bacteria)
OTU_1848	Bacteria	Firmicutes	Clostridia	Clostridiales	Lachnospiraceae	Lacrimispora	OTU_1848 (unc_Lacrimispora)
OTU_1673	Bacteria	Proteobacteria	Alphaproteobacteria	unc_Alphaproteobacteria	unc_Alphaproteobacteria	unc_Alphaproteobacteria	OTU_1673 (unc_Alphaproteobacteria)
OTU_1920	Bacteria	Acidobacteria	Acidobacteria_Gp6	Gp6	Gp6	Gp6	OTU_1920 (unc_Gp6)
OTU_2691	Bacteria	Actinobacteria	Thermoleophilia	Gaiellales	Gaiellaceae	Gaiella	OTU_2691 (unc_Gaiella)
OTU_3313	Bacteria	unc_Bacteria	unc_Bacteria	unc_Bacteria	unc_Bacteria	unc_Bacteria	OTU_3313 (unc_Bacteria)
OTU_2194	Bacteria	unc_Bacteria	unc_Bacteria	unc_Bacteria	unc_Bacteria	unc_Bacteria	OTU_2194 (unc_Bacteria)
OTU_6648	Bacteria	Proteobacteria	Betaproteobacteria	unc_Betaproteobacteria	unc_Betaproteobacteria	unc_Betaproteobacteria	OTU_6648 (unc_Betaproteobacteria)
OTU_2872	Archaea	Euryarchaeota	Thermoplasmata	unc_Thermoplasmata	unc_Thermoplasmata	unc_Thermoplasmata	OTU_2872 (unc_Thermoplasmata)
OTU_1472	Bacteria	Actinobacteria	Actinobacteria	Pseudonocardiales	Pseudonocardiaceae	Pseudonocardia	OTU_1472 (Pseudonocardia_khuvsgulensis)
OTU_1671	Bacteria	Bacteroidetes	Chitinophagia	Chitinophagales	Chitinophagaceae	Terrimonas	OTU_1671 (unc_Terrimonas)
OTU_1820	Bacteria	Actinobacteria	Actinobacteria	Streptosporangiales	Thermomonosporaceae	Actinomadura	OTU_1820 (Actinomadura_alba)
OTU_3616	Bacteria	Gemmatimonadetes	Longimicrobia	Longimicrobiales	Longimicrobiaceae	Longimicrobium	OTU_3616 (Longimicrobium_terrae)
OTU_2788	Bacteria	Proteobacteria	Betaproteobacteria	Rhodocyclales	unc_Rhodocyclales	unc_Rhodocyclales	OTU_2788 (unc_Rhodocyclales)
OTU_6226	Bacteria	Firmicutes	Bacilli	Bacillales	Bacillaceae1	Bacillus	OTU_6226 (unc_Bacillus)
OTU_3214	Bacteria	Verrucomicrobia	Verrucomicrobiae	Verrucomicrobiales	Verrucomicrobiaceae	Luteolibacter	OTU_3214 (Luteolibacter_arcticus)
OTU_4808	Bacteria	Actinobacteria	unc_Actinobacteria	unc_Actinobacteria	unc_Actinobacteria	unc_Actinobacteria	OTU_4808 (unc_Actinobacteria)
OTU_941	Bacteria	Actinobacteria	Actinobacteria	Micromonosporales	Micromonosporaceae	unc_Micromonosporaceae	OTU_941 (unc_Micromonosporaceae)
OTU_4748	Bacteria	Acidobacteria	Acidobacteria_Gp6	Gp6	Gp6	Gp6	OTU_4748 (unc_Gp6)
OTU_1492	Bacteria	unc_Bacteria	unc_Bacteria	unc_Bacteria	unc_Bacteria	unc_Bacteria	OTU_1492 (unc_Bacteria)
OTU_1197	Bacteria	Chloroflexi	Caldilineae	Caldilineales	Caldilineaceae	unc_Caldilineaceae	OTU_1197 (unc_Caldilineaceae)
OTU_1854	Bacteria	Actinobacteria	Acidimicrobiia	Acidimicrobiales	unc_Acidimicrobiales	unc_Acidimicrobiales	OTU_1854 (unc_Acidimicrobiales)
OTU_2090	Bacteria	Gemmatimonadetes	Gemmatimonadetes	Gemmatimonadales	Gemmatimonadaceae	unc_Gemmatimonadaceae	OTU_2090 (unc_Gemmatimonadaceae)
OTU_4607	Bacteria	Proteobacteria	Alphaproteobacteria	Rhodobacterales	Rhodobacteraceae	Amaricoccus	OTU_4607 (unc_Amaricoccus)
OTU_2387	Bacteria	Armatimonadetes	Chthonomonadetes	Chthonomonadales	Chthonomonadaceae	Chthonomonas/Armatimonadetes	OTU_2387 (uncultured_bacterium)
OTU_3822	Bacteria	unc_Bacteria	unc_Bacteria	unc_Bacteria	unc_Bacteria	unc_Bacteria	OTU_3822 (unc_Bacteria)
OTU_2000	Bacteria	unc_Bacteria	unc_Bacteria	unc_Bacteria	unc_Bacteria	unc_Bacteria	OTU_2000 (unc_Bacteria)
OTU_1944	Bacteria	Proteobacteria	Alphaproteobacteria	Rhodospirillales	unc_Rhodospirillales	unc_Rhodospirillales	OTU_1944 (unc_Rhodospirillales)
OTU_1680	Bacteria	Acidobacteria	Acidobacteria_Gp4	Gp4	Gp4	Gp4	OTU_1680 (unc_Gp4)
OTU_1210	Bacteria	unc_Bacteria	unc_Bacteria	unc_Bacteria	unc_Bacteria	unc_Bacteria	OTU_1210 (unc_Bacteria)
OTU_1142	Bacteria	Actinobacteria	Thermoleophilia	unc_Thermoleophilia	unc_Thermoleophilia	unc_Thermoleophilia	OTU_1142 (unc_Thermoleophilia)
OTU_1543	Bacteria	Gemmatimonadetes	Gemmatimonadetes	Gemmatimonadales	Gemmatimonadaceae	unc_Gemmatimonadaceae	OTU_1543 (unc_Gemmatimonadaceae)
OTU_1922	Bacteria	Acidobacteria	Acidobacteria_Gp6	Gp6	Gp6	Gp6	OTU_1922 (unc_Gp6)
OTU_2710	Bacteria	Candidatus Saccharibacteria	Saccharibacteria_genera_incertae_sedis	Saccharibacteria_genera_incertae_sedis	Saccharibacteria_genera_incertae_sedis	Saccharibacteria_genera_incertae_sedis	OTU_2710 (unc_Saccharibacteria_genera_incertae_sedis)
OTU_1500	Bacteria	Proteobacteria	Deltaproteobacteria	Myxococcales	unc_Myxococcales	unc_Myxococcales	OTU_1500 (unc_Myxococcales)
OTU_4915	Bacteria	Actinobacteria	Thermoleophilia	Solirubrobacterales	unc_Solirubrobacterales	unc_Solirubrobacterales	OTU_4915 (unc_Solirubrobacterales)
OTU_2223	Bacteria	Bacteroidetes	Chitinophagia	Chitinophagales	Chitinophagaceae	Flavisolibacter	OTU_2223 (Flavisolibacter_rigui)
OTU_2345	Bacteria	Bacteroidetes	unc_Bacteroidetes	unc_Bacteroidetes	unc_Bacteroidetes	unc_Bacteroidetes	OTU_2345 (unc_Bacteroidetes)
OTU_9186	Bacteria	Actinobacteria	Thermoleophilia	Solirubrobacterales	unc_Solirubrobacterales	unc_Solirubrobacterales	OTU_9186 (unc_Solirubrobacterales)
OTU_7148	Bacteria	Actinobacteria	Thermoleophilia	unc_Thermoleophilia	unc_Thermoleophilia	unc_Thermoleophilia	OTU_7148 (unc_Thermoleophilia)
OTU_3345	Bacteria	Acidobacteria	Acidobacteria_Gp4	Gp4	Gp4	Gp4	OTU_3345 (unc_Gp4)
OTU_9722	Bacteria	Firmicutes	Bacilli	Bacillales	Paenibacillaceae1	Cohnella	OTU_9722 (unc_Cohnella)
OTU_659	Bacteria	unc_Bacteria	unc_Bacteria	unc_Bacteria	unc_Bacteria	unc_Bacteria	OTU_659 (unc_Bacteria)
OTU_3072	Bacteria	Gemmatimonadetes	Gemmatimonadetes	Gemmatimonadales	Gemmatimonadaceae	Gemmatimonas	OTU_3072 (unc_Gemmatimonas)
OTU_1741	Bacteria	unc_Bacteria	unc_Bacteria	unc_Bacteria	unc_Bacteria	unc_Bacteria	OTU_1741 (unc_Bacteria)
OTU_574	Bacteria	Proteobacteria	Betaproteobacteria	Burkholderiales	Alcaligenaceae	Achromobacter	OTU_574 (unc_Achromobacter)
OTU_2997	Bacteria	Proteobacteria	Betaproteobacteria	unc_Betaproteobacteria	unc_Betaproteobacteria	unc_Betaproteobacteria	OTU_2997 (unc_Betaproteobacteria)
OTU_1609	Bacteria	Acidobacteria	unc_Acidobacteria	unc_Acidobacteria	unc_Acidobacteria	unc_Acidobacteria	OTU_1609 (unc_Acidobacteria)
OTU_905	Bacteria	Proteobacteria	Alphaproteobacteria	Caulobacterales	Caulobacteraceae	Phenylobacterium	OTU_905 (unc_Phenylobacterium)
OTU_9468	Bacteria	unc_Bacteria	unc_Bacteria	unc_Bacteria	unc_Bacteria	unc_Bacteria	OTU_9468 (unc_Bacteria)
OTU_2950	Bacteria	Proteobacteria	Alphaproteobacteria	Rhodospirillales	Rhodospirillaceae	Aliidongia	OTU_2950 (unc_Aliidongia)
OTU_2047	Bacteria	Verrucomicrobia	Verrucomicrobiae	Verrucomicrobiales	Verrucomicrobiaceae	unc_Verrucomicrobiaceae	OTU_2047 (unc_Verrucomicrobiaceae)
OTU_2159	Bacteria	Actinobacteria	Actinobacteria	Micromonosporales	Micromonosporaceae	unc_Micromonosporaceae	OTU_2159 (unc_Micromonosporaceae)
OTU_9816	Bacteria	Proteobacteria	Betaproteobacteria	Burkholderiales	Comamonadaceae	unc_Comamonadaceae	OTU_9816 (unc_Comamonadaceae)
OTU_1442	Bacteria	Chloroflexi	unc_Chloroflexi	unc_Chloroflexi	unc_Chloroflexi	unc_Chloroflexi	OTU_1442 (unc_Chloroflexi)
OTU_2086	Bacteria	Acidobacteria	Blastocatellia	Blastocatellales	Blastocatellaceae	unc_Blastocatellaceae	OTU_2086 (unc_Blastocatellaceae)
OTU_1747	Bacteria	unc_Bacteria	unc_Bacteria	unc_Bacteria	unc_Bacteria	unc_Bacteria	OTU_1747 (unc_Bacteria)
OTU_1446	Bacteria	Proteobacteria	Alphaproteobacteria	Rhodospirillales	Geminicoccaceae	Arboricoccus	OTU_1446 (unc_Arboricoccus)
OTU_1103	Bacteria	Acidobacteria	Acidobacteria	unc_Acidobacteria	unc_Acidobacteria	Gp6	OTU_1103 (unc_Gp6)
OTU_1676	Bacteria	unc_Bacteria	unc_Bacteria	unc_Bacteria	unc_Bacteria	unc_Bacteria	OTU_1676 (unc_Bacteria)
OTU_1383	Bacteria	Acidobacteria	Acidobacteria	unc_Acidobacteria	unc_Acidobacteria	unc_Acidobacteria	OTU_1383 (unc_Acidobacteria)
OTU_1540	Bacteria	Proteobacteria	Deltaproteobacteria	Myxococcales	unc_Myxococcales	unc_Myxococcales	OTU_1540 (unc_Myxococcales)
OTU_3051	Bacteria	Proteobacteria	Alphaproteobacteria	Rhizobiales	unc_Rhizobiales	unc_Rhizobiales	OTU_3051 (unc_Rhizobiales)
OTU_2465	Bacteria	Actinobacteria	unc_Actinobacteria	unc_Actinobacteria	unc_Actinobacteria	unc_Actinobacteria	OTU_2465 (unc_Actinobacteria)
OTU_9837	Bacteria	Actinobacteria	Actinobacteria	Geodermatophilales	Geodermatophilaceae	Blastococcus	OTU_9837 (unc_Blastococcus)
OTU_1344	Bacteria	Actinobacteria	Actinobacteria	Micromonosporales	Micromonosporaceae	unc_Micromonosporaceae	OTU_1344 (unc_Micromonosporaceae)
OTU_1411	Bacteria	unc_Bacteria	unc_Bacteria	unc_Bacteria	unc_Bacteria	unc_Bacteria	OTU_1411 (unc_Bacteria)
OTU_1261	Bacteria	Firmicutes	Bacilli	Bacillales	Bacillaceae2	Compostibacillus	OTU_1261 (Compostibacillus_humi)
OTU_1393	Bacteria	Chloroflexi	Anaerolineae	unc_Anaerolineae	unc_Anaerolineae	unc_Anaerolineae	OTU_1393 (unc_Anaerolineae)
OTU_3924	Bacteria	Acidobacteria	Acidobacteria_Gp6	Gp6	Gp6	Gp6	OTU_3924 (unc_Gp6)
OTU_1856	Bacteria	Gemmatimonadetes	Gemmatimonadetes	Gemmatimonadales	Gemmatimonadaceae	unc_Gemmatimonadaceae	OTU_1856 (unc_Gemmatimonadaceae)
OTU_2860	Bacteria	Firmicutes	Clostridia	Clostridiales	Ruminococcaceae	Ruminiclostridium	OTU_2860 (unc_Ruminiclostridium)
OTU_1191	Bacteria	Actinobacteria	Acidimicrobiia	Acidimicrobiales	unc_Acidimicrobiales	unc_Acidimicrobiales	OTU_1191 (unc_Acidimicrobiales)
OTU_1694	Bacteria	Bacteroidetes	Cytophagia	Cytophagales	Hymenobacteraceae	Hymenobacter	OTU_1694 (unc_Hymenobacter)
OTU_4647	Bacteria	Chloroflexi	unc_Chloroflexi	unc_Chloroflexi	unc_Chloroflexi	unc_Chloroflexi	OTU_4647 (unc_Chloroflexi)
OTU_3490	Bacteria	Actinobacteria	Actinobacteria	Propionibacteriales	Nocardioidaceae	Nocardioides	OTU_3490 (unc_Nocardioides)
OTU_8057	Bacteria	Chloroflexi	unc_Chloroflexi	unc_Chloroflexi	unc_Chloroflexi	unc_Chloroflexi	OTU_8057 (unc_Chloroflexi)
OTU_3387	Bacteria	Gemmatimonadetes	Gemmatimonadetes	Gemmatimonadales	Gemmatimonadaceae	unc_Gemmatimonadaceae	OTU_3387 (unc_Gemmatimonadaceae)
OTU_1990	Bacteria	Firmicutes	Bacilli	Bacillales	Bacillaceae 1	Alkalihalobacillus	OTU_1990 (unc_Alkalihalobacillus)
OTU_2632	Bacteria	Armatimonadetes	Chthonomonadetes	Chthonomonadales	Chthonomonadaceae	Chthonomonas/Armatimonadetes_gp3	OTU_2632 (unc_Chthonomonas/Armatimonadetes_gp3)
OTU_1570	Bacteria	Verrucomicrobia	Spartobacteria	Spartobacteria_genera_incertae_sedis	Spartobacteria_genera_incertae_sedis	Spartobacteria_genera_incertae_sedis	OTU_1570 (unc_Spartobacteria_genera_incertae_sedis)
OTU_5171	Bacteria	Proteobacteria	Deltaproteobacteria	Myxococcales	unc_Myxococcales	unc_Myxococcales	OTU_5171 (unc_Myxococcales)
OTU_8559	Bacteria	unc_Bacteria	unc_Bacteria	unc_Bacteria	unc_Bacteria	unc_Bacteria	OTU_8559 (unc_Bacteria)
OTU_1889	Bacteria	unc_Bacteria	unc_Bacteria	unc_Bacteria	unc_Bacteria	unc_Bacteria	OTU_1889 (unc_Bacteria)
OTU_1585	Bacteria	candidate division WPS-1	WPS-1_genera_incertae_sedis	WPS-1_genera_incertae_sedis	WPS-1_genera_incertae_sedis	WPS-1_genera_incertae_sedis	OTU_1585 (unc_WPS-1_genera_incertae_sedis)
OTU_1522	Bacteria	Chloroflexi	Ktedonobacteria	Ktedonobacterales	unc_Ktedonobacterales	unc_Ktedonobacterales	OTU_1522 (unc_Ktedonobacterales)
OTU_1568	Bacteria	Proteobacteria	Alphaproteobacteria	Rhizobiales	Boseaceae	Bosea	OTU_1568 (unc_Bosea)
OTU_3512	Bacteria	Acidobacteria	Acidobacteria_Gp6	Gp6	Gp6	Gp6	OTU_3512 (unc_Gp6)
OTU_578	Bacteria	Firmicutes	Clostridia	Clostridiales	Ruminococcaceae	Acetivibrio	OTU_578 (Acetivibrio_saccincola)
OTU_2507	Bacteria	unc_Bacteria	unc_Bacteria	unc_Bacteria	unc_Bacteria	unc_Bacteria	OTU_2507 (unc_Bacteria)
OTU_6851	Bacteria	unc_Bacteria	unc_Bacteria	unc_Bacteria	unc_Bacteria	unc_Bacteria	OTU_6851 (unc_Bacteria)
OTU_4628	Bacteria	Acidobacteria	Acidobacteria_Gp10	Gp10	Gp10	Gp10	OTU_4628 (unc_Gp10)
OTU_2179	Bacteria	Actinobacteria	unc_Actinobacteria	unc_Actinobacteria	unc_Actinobacteria	unc_Actinobacteria	OTU_2179 (unc_Actinobacteria)
OTU_4415	Bacteria	Verrucomicrobia	Verrucomicrobiae	Verrucomicrobiales	Verrucomicrobiaceae	unc_Verrucomicrobiaceae	OTU_4415 (unc_Verrucomicrobiaceae)
OTU_1539	Bacteria	Proteobacteria	Alphaproteobacteria	Rhodospirillales	Rhodospirillaceae	unc_Rhodospirillaceae	OTU_1539 (unc_Rhodospirillaceae)
OTU_1437	Bacteria	Acidobacteria	Acidobacteria_Gp17	Gp17	Gp17	Gp17	OTU_1437 (unc_Gp17)
OTU_1734	Bacteria	Actinobacteria	unc_Actinobacteria	unc_Actinobacteria	unc_Actinobacteria	unc_Actinobacteria	OTU_1734 (unc_Actinobacteria)
OTU_2802	Bacteria	Firmicutes	Clostridia	Clostridiales	Tissierellaceae	Tissierella	OTU_2802 (unc_Tissierella)
OTU_3488	Bacteria	Proteobacteria	Gammaproteobacteria	Nevskiales	Steroidobacteraceae	Steroidobacter	OTU_3488 (unc_Steroidobacter)
OTU_2600	Bacteria	Armatimonadetes	Chthonomonadetes	Chthonomonadales	Chthonomonadaceae	Chthonomonas/Armatimonadetes	OTU_2600 (uncultured_bacterium)
OTU_2506	Bacteria	Acidobacteria	Acidobacteria	unc_Acidobacteria	unc_Acidobacteria	unc_Acidobacteria	OTU_2506 (unc_Acidobacteria)
OTU_4390	Bacteria	Bacteroidetes	Saprospiria	Saprospirales	unc_Saprospirales	unc_Saprospirales	OTU_4390 (unc_Saprospirales)
OTU_4409	Bacteria	Acidobacteria	Acidobacteria_Gp17	Gp17	Gp17	Gp17	OTU_4409 (unc_Gp17)
OTU_2711	Bacteria	Acidobacteria	Acidobacteria_Gp6	Gp6	Gp6	Gp6	OTU_2711 (unc_Gp6)
OTU_1890	Bacteria	candidate division WPS-1	WPS-1_genera_incertae_sedis	WPS-1_genera_incertae_sedis	WPS-1_genera_incertae_sedis	WPS-1_genera_incertae_sedis	OTU_1890 (unc_WPS-1_genera_incertae_sedis)
OTU_5299	Bacteria	unc_Bacteria	unc_Bacteria	unc_Bacteria	unc_Bacteria	unc_Bacteria	OTU_5299 (unc_Bacteria)
OTU_4366	Bacteria	Proteobacteria	Betaproteobacteria	Burkholderiales	Comamonadaceae	unc_Comamonadaceae	OTU_4366 (unc_Comamonadaceae)
OTU_1566	Bacteria	Proteobacteria	Deltaproteobacteria	Myxococcales	unc_Myxococcales	unc_Myxococcales	OTU_1566 (unc_Myxococcales)
OTU_2235	Bacteria	Acidobacteria	Acidobacteria	unc_Acidobacteria	unc_Acidobacteria	unc_Acidobacteria	OTU_2235 (unc_Acidobacteria)
OTU_2896	Bacteria	Proteobacteria	Deltaproteobacteria	Myxococcales	Labilitrichaceae	Labilithrix	OTU_2896 (unc_Labilithrix)
OTU_2153	Bacteria	Firmicutes	Clostridia	Clostridiales	Ruminococcaceae	Acetivibrio	OTU_2153 (unc_Acetivibrio)
OTU_3976	Bacteria	unc_Bacteria	unc_Bacteria	unc_Bacteria	unc_Bacteria	unc_Bacteria	OTU_3976 (unc_Bacteria)
OTU_2792	Bacteria	Proteobacteria	Deltaproteobacteria	Myxococcales	unc_Myxococcales	unc_Myxococcales	OTU_2792 (unc_Myxococcales)
OTU_10120	Bacteria	Actinobacteria	Thermoleophilia	unc_Thermoleophilia	unc_Thermoleophilia	unc_Thermoleophilia	OTU_10120 (unc_Thermoleophilia)
OTU_9735	Bacteria	Acidobacteria	Acidobacteria_Gp4	Gp4	Gp4	Gp4	OTU_9735 (unc_Gp4)
OTU_1342	Bacteria	Proteobacteria	Alphaproteobacteria	Rhodospirillales	unc_Rhodospirillales	unc_Rhodospirillales	OTU_1342 (unc_Rhodospirillales)
OTU_3599	Bacteria	Chloroflexi	unc_Chloroflexi	unc_Chloroflexi	unc_Chloroflexi	unc_Chloroflexi	OTU_3599 (unc_Chloroflexi)
OTU_1274	Bacteria	Chloroflexi	Ktedonobacteria	Ktedonobacterales	unc_Ktedonobacterales	unc_Ktedonobacterales	OTU_1274 (unc_Ktedonobacterales)
OTU_8707	Bacteria	Proteobacteria	Alphaproteobacteria	Rhizobiales	Hyphomicrobiaceae	Pedomicrobium	OTU_8707 (unc_Pedomicrobium)
OTU_712	Bacteria	unc_Bacteria	unc_Bacteria	unc_Bacteria	unc_Bacteria	unc_Bacteria	OTU_712 (unc_Bacteria)
OTU_3314	Bacteria	Chloroflexi	Thermomicrobia	Sphaerobacterales	Sphaerobacteraceae	unc_Sphaerobacteraceae	OTU_3314 (unc_Sphaerobacteraceae)
OTU_577	Bacteria	Proteobacteria	Gammaproteobacteria	Xanthomonadales	Xanthomonadaceae	Arenimonas	OTU_577 (unc_Arenimonas)
OTU_7851	Bacteria	unc_Bacteria	unc_Bacteria	unc_Bacteria	unc_Bacteria	unc_Bacteria	OTU_7851 (unc_Bacteria)
OTU_767	Bacteria	unc_Bacteria	unc_Bacteria	unc_Bacteria	unc_Bacteria	unc_Bacteria	OTU_767 (unc_Bacteria)
OTU_2030	Bacteria	unc_Bacteria	unc_Bacteria	unc_Bacteria	unc_Bacteria	unc_Bacteria	OTU_2030 (unc_Bacteria)
OTU_7372	Bacteria	Firmicutes	Bacilli	Bacillales	Planococcaceae	unc_Planococcaceae	OTU_7372 (unc_Planococcaceae)
OTU_1952	Bacteria	unc_Bacteria	unc_Bacteria	unc_Bacteria	unc_Bacteria	unc_Bacteria	OTU_1952 (unc_Bacteria)
OTU_2696	Bacteria	Proteobacteria	Deltaproteobacteria	Myxococcales	unc_Myxococcales	unc_Myxococcales	OTU_2696 (unc_Myxococcales)
OTU_1515	Bacteria	Acidobacteria	Acidobacteria_Gp2	Gp2	Gp2	Gp2	OTU_1515 (unc_Gp2)
OTU_3308	Bacteria	Proteobacteria	Alphaproteobacteria	unc_Alphaproteobacteria	unc_Alphaproteobacteria	unc_Alphaproteobacteria	OTU_3308 (unc_Alphaproteobacteria)
OTU_725	Bacteria	unc_Bacteria	unc_Bacteria	unc_Bacteria	unc_Bacteria	unc_Bacteria	OTU_725 (unc_Bacteria)
OTU_2909	Bacteria	unc_Bacteria	unc_Bacteria	unc_Bacteria	unc_Bacteria	unc_Bacteria	OTU_2909 (unc_Bacteria)
OTU_1211	Bacteria	Actinobacteria	Acidimicrobiia	Acidimicrobiales	Iamiaceae	unc_Iamiaceae	OTU_1211 (unc_Iamiaceae)
OTU_2071	Bacteria	Proteobacteria	Deltaproteobacteria	Myxococcales	unc_Myxococcales	unc_Myxococcales	OTU_2071 (unc_Myxococcales)
OTU_845	Bacteria	Acidobacteria	Acidobacteria_Gp6	Gp6	Gp6	Gp6	OTU_845 (unc_Gp6)
OTU_1468	Bacteria	Chloroflexi	unc_Chloroflexi	unc_Chloroflexi	unc_Chloroflexi	unc_Chloroflexi	OTU_1468 (unc_Chloroflexi)
OTU_3528	Bacteria	Actinobacteria	Actinobacteria	Streptosporangiales	Streptosporangiaceae	unc_Streptosporangiaceae	OTU_3528 (unc_Streptosporangiaceae)
OTU_878	Bacteria	Acidobacteria	Acidobacteria_Gp6	Gp6	Gp6	Gp6	OTU_878 (unc_Gp6)
OTU_2358	Bacteria	Proteobacteria	Alphaproteobacteria	Rhodospirillales	Azospirillaceae	unc_Azospirillaceae	OTU_2358 (unc_Azospirillaceae)
OTU_3871	Bacteria	Actinobacteria	Thermoleophilia	Solirubrobacterales	unc_Solirubrobacterales	unc_Solirubrobacterales	OTU_3871 (unc_Solirubrobacterales)
OTU_1601	Bacteria	Proteobacteria	Gammaproteobacteria	Xanthomonadales	Xanthomonadaceae	Pseudoxanthomonas	OTU_1601 (unc_Pseudoxanthomonas)
OTU_1613	Bacteria	Firmicutes	Bacilli	Bacillales	Paenibacillaceae1	Paenibacillus	OTU_1613 (Paenibacillus_ginsengihumi)
OTU_1846	Bacteria	Actinobacteria	Actinobacteria	Streptomycetales	Streptomycetaceae	Streptomyces	OTU_1846 (unc_Streptomyces)
OTU_4283	Bacteria	Bacteroidetes	unc_Bacteroidetes	unc_Bacteroidetes	unc_Bacteroidetes	unc_Bacteroidetes	OTU_4283 (unc_Bacteroidetes)
OTU_5796	Bacteria	Verrucomicrobia	Verrucomicrobiae	Verrucomicrobiales	Verrucomicrobiaceae	unc_Verrucomicrobiaceae	OTU_5796 (unc_Verrucomicrobiaceae)
OTU_2443	Bacteria	Proteobacteria	Gammaproteobacteria	Xanthomonadales	unc_Xanthomonadales	unc_Xanthomonadales	OTU_2443 (unc_Xanthomonadales)
OTU_3500	Bacteria	Proteobacteria	Deltaproteobacteria	Myxococcales	unc_Myxococcales	unc_Myxococcales	OTU_3500 (unc_Myxococcales)
OTU_2816	Bacteria	Actinobacteria	Acidimicrobiia	Acidimicrobiales	unc_Acidimicrobiales	unc_Acidimicrobiales	OTU_2816 (unc_Acidimicrobiales)
OTU_3469	Bacteria	Acidobacteria	Acidobacteria	unc_Acidobacteria	unc_Acidobacteria	unc_Acidobacteria	OTU_3469 (unc_Acidobacteria)
OTU_1360	Bacteria	Chloroflexi	Anaerolineae	unc_Anaerolineae	unc_Anaerolineae	unc_Anaerolineae	OTU_1360 (unc_Anaerolineae)
OTU_9246	Bacteria	Acidobacteria	unc_Acidobacteria	unc_Acidobacteria	unc_Acidobacteria	unc_Acidobacteria	OTU_9246 (unc_Acidobacteria)
OTU_678	Bacteria	Proteobacteria	Alphaproteobacteria	Rhizobiales	Chelatococcaceae	Chelatococcus	OTU_678 (unc_Chelatococcus)
OTU_1702	Bacteria	unc_Bacteria	unc_Bacteria	unc_Bacteria	unc_Bacteria	unc_Bacteria	OTU_1702 (unc_Bacteria)
OTU_557	Bacteria	unc_Bacteria	unc_Bacteria	unc_Bacteria	unc_Bacteria	unc_Bacteria	OTU_557 (unc_Bacteria)
OTU_8681	Bacteria	Firmicutes	Bacilli	Bacillales	Bacillaceae1	unc_Bacillaceae1	OTU_8681 (unc_Bacillaceae1)
OTU_3735	Bacteria	Acidobacteria	Acidobacteria_Gp3	Gp3	Gp3	Gp3	OTU_3735 (unc_Gp3)
OTU_3237	Bacteria	unc_Bacteria	unc_Bacteria	unc_Bacteria	unc_Bacteria	unc_Bacteria	OTU_3237 (unc_Bacteria)
OTU_1984	Bacteria	Bacteroidetes	Chitinophagia	Chitinophagales	Chitinophagaceae	Flavisolibacter	OTU_1984 (unc_Flavisolibacter)
OTU_2295	Bacteria	Chloroflexi	Anaerolineae	unc_Anaerolineae	unc_Anaerolineae	unc_Anaerolineae	OTU_2295 (unc_Anaerolineae)
OTU_6595	Bacteria	Gemmatimonadetes	Longimicrobia	Longimicrobiales	Longimicrobiaceae	Longimicrobium	OTU_6595 (Longimicrobium_terrae)
OTU_4370	Bacteria	Acidobacteria	Acidobacteria_Gp6	Gp6	Gp6	Gp6	OTU_4370 (unc_Gp6)
OTU_1802	Bacteria	unc_Bacteria	unc_Bacteria	unc_Bacteria	unc_Bacteria	unc_Bacteria	OTU_1802 (unc_Bacteria)
OTU_1172	Bacteria	Actinobacteria	Actinobacteria	Mycobacteriales	Gordoniaceae	Williamsia	OTU_1172 (unc_Williamsia)
OTU_4530	Bacteria	Proteobacteria	Betaproteobacteria	Burkholderiales	unc_Burkholderiales	unc_Burkholderiales	OTU_4530 (unc_Burkholderiales)
OTU_1880	Bacteria	Verrucomicrobia	Spartobacteria	unc_Spartobacteria	unc_Spartobacteria	Spartobacteria_genera_incertae	OTU_1880 (unc_Spartobacteria_genera_incertae)
OTU_2050	Bacteria	Acidobacteria	Acidobacteria_Gp4	Gp4	Gp4	Gp4	OTU_2050 (unc_Gp4)
OTU_1787	Bacteria	Actinobacteria	unc_Actinobacteria	unc_Actinobacteria	unc_Actinobacteria	unc_Actinobacteria	OTU_1787 (unc_Actinobacteria)
OTU_2756	Bacteria	Planctomycetes	Planctomycetacia	Planctomycetales	Isosphaeraceae	Singulisphaera	OTU_2756 (unc_Singulisphaera)
OTU_3745	Bacteria	Acidobacteria	unc_Acidobacteria	unc_Acidobacteria	unc_Acidobacteria	unc_Acidobacteria	OTU_3745 (unc_Acidobacteria)
OTU_9608	Bacteria	Acidobacteria	Acidobacteria_Gp6	Gp6	Gp6	Gp6	OTU_9608 (unc_Gp6)
OTU_2631	Bacteria	Actinobacteria	Thermoleophilia	Gaiellales	Gaiellaceae	Gaiella	OTU_2631 (unc_Gaiella)
OTU_1271	Bacteria	Actinobacteria	Actinobacteria	Catenulisporales	Catenulisporaceae	Catenulispora	OTU_1271 (Catenulispora_yoronensis)
OTU_8456	Bacteria	Actinobacteria	Thermoleophilia	unc_Thermoleophilia	unc_Thermoleophilia	unc_Thermoleophilia	OTU_8456 (unc_Thermoleophilia)
OTU_5316	Bacteria	Proteobacteria	Alphaproteobacteria	Rhodospirillales	unc_Rhodospirillales	unc_Rhodospirillales	OTU_5316 (unc_Rhodospirillales)
OTU_4141	Bacteria	Proteobacteria	Deltaproteobacteria	Myxococcales	Polyangiaceae	unc_Polyangiaceae	OTU_4141 (unc_Polyangiaceae)
OTU_7262	Bacteria	Bacteroidetes	Chitinophagia	Chitinophagales	Chitinophagaceae	unc_Chitinophagaceae	OTU_7262 (unc_Chitinophagaceae)
OTU_9882	Bacteria	Actinobacteria	Thermoleophilia	Gaiellales	Gaiellaceae	Gaiella	OTU_9882 (unc_Gaiella)
OTU_1825	Bacteria	Actinobacteria	Acidimicrobiia	Acidimicrobiales	Iamiaceae	Actinomarinicola	OTU_1825 (unc_Actinomarinicola)
OTU_7897	Bacteria	Chloroflexi	unc_Chloroflexi	unc_Chloroflexi	unc_Chloroflexi	unc_Chloroflexi	OTU_7897 (unc_Chloroflexi)
OTU_394	Bacteria	Proteobacteria	Deltaproteobacteria	Myxococcales	Nannocystaceae	Nannocystis	OTU_394 (unc_Nannocystis)
OTU_2490	Bacteria	Armatimonadetes	unc_Armatimonadetes	unc_Armatimonadetes	unc_Armatimonadetes	Armatimonadetes	OTU_2490 (unc_Armatimonadetes)
OTU_3188	Bacteria	Firmicutes	Bacilli	Bacillales	Bacillaceae 2	Oceanobacillus	OTU_3188 (unc_Oceanobacillus)
OTU_3253	Bacteria	unc_Bacteria	unc_Bacteria	unc_Bacteria	unc_Bacteria	unc_Bacteria	OTU_3253 (unc_Bacteria)
OTU_3184	Bacteria	Acidobacteria	Acidobacteria_Gp25	Gp25	Gp25	Gp25	OTU_3184 (unc_Gp25)
OTU_4065	Bacteria	Proteobacteria	Deltaproteobacteria	Myxococcales	Polyangiaceae	Polyangium	OTU_4065 (unc_Polyangium)
OTU_5724	Bacteria	Verrucomicrobia	Subdivision3	Subdivision3_genera_incertae_sedis	Subdivision3_genera_incertae_sedis	Subdivision3_genera_incertae_sedis	OTU_5724 (unc_Subdivision3_genera_incertae_sedis)
OTU_2279	Bacteria	unc_Bacteria	unc_Bacteria	unc_Bacteria	unc_Bacteria	unc_Bacteria	OTU_2279 (unc_Bacteria)
OTU_565	Bacteria	Firmicutes	Bacilli	Bacillales	Thermoactinomycetaceae2	Planifilum	OTU_565 (Planifilum_composti)
OTU_4091	Bacteria	Firmicutes	Bacilli	Bacillales	Paenibacillaceae1	unc_Paenibacillaceae1	OTU_4091 (unc_Paenibacillaceae1)
OTU_2835	Bacteria	Verrucomicrobia	Verrucomicrobiae	Verrucomicrobiales	Verrucomicrobiaceae	Phragmitibacter	OTU_2835 (unc_Phragmitibacter)
OTU_2488	Bacteria	unc_Bacteria	unc_Bacteria	unc_Bacteria	unc_Bacteria	unc_Bacteria	OTU_2488 (unc_Bacteria)
OTU_4564	Bacteria	Proteobacteria	Deltaproteobacteria	Myxococcales	Kofleriaceae	Kofleria	OTU_4564 (unc_Kofleria)
OTU_8002	Bacteria	Planctomycetes	Planctomycetacia	Planctomycetales	Isosphaeraceae	Singulisphaera	OTU_8002 (unc_Singulisphaera)
OTU_2777	Bacteria	Proteobacteria	Alphaproteobacteria	unc_Alphaproteobacteria	unc_Alphaproteobacteria	unc_Alphaproteobacteria	OTU_2777 (unc_Alphaproteobacteria)
OTU_115	Bacteria	Proteobacteria	Alphaproteobacteria	Rhizobiales	Phyllobacteriaceae	Aquamicrobium	OTU_115 (unc_Aquamicrobium)
OTU_2224	Bacteria	unc_Bacteria	unc_Bacteria	unc_Bacteria	unc_Bacteria	unc_Bacteria	OTU_2224 (unc_Bacteria)
OTU_3374	Bacteria	Proteobacteria	Betaproteobacteria	unc_Betaproteobacteria	unc_Betaproteobacteria	unc_Betaproteobacteria	OTU_3374 (unc_Betaproteobacteria)
OTU_677	Bacteria	Actinobacteria	Thermoleophilia	Gaiellales	Gaiellaceae	Gaiella	OTU_677 (unc_Gaiella)
OTU_1121	Bacteria	Actinobacteria	Thermoleophilia	unc_Thermoleophilia	unc_Thermoleophilia	unc_Thermoleophilia	OTU_1121 (unc_Thermoleophilia)
OTU_2437	Bacteria	candidate division WPS-1	WPS-1_genera_incertae_sedis	WPS-1_genera_incertae_sedis	WPS-1_genera_incertae_sedis	WPS-1_genera_incertae_sedis	OTU_2437 (unc_WPS-1_genera_incertae_sedis)
OTU_1845	Bacteria	Proteobacteria	Betaproteobacteria	unc_Betaproteobacteria	unc_Betaproteobacteria	unc_Betaproteobacteria	OTU_1845 (unc_Betaproteobacteria)
OTU_5619	Bacteria	Proteobacteria	Deltaproteobacteria	Myxococcales	Kofleriaceae	Kofleria	OTU_5619 (unc_Kofleria)
OTU_2684	Bacteria	Acidobacteria	Acidobacteria_Gp7	Gp7	Gp7	Gp7	OTU_2684 (unc_Gp7)
OTU_5238	Bacteria	Acidobacteria	Acidobacteria	unc_Acidobacteria	unc_Acidobacteria	Gp16	OTU_5238 (uncultured_Acidobacteria)
OTU_2246	Bacteria	Firmicutes	Bacilli	Bacillales	Paenibacillaceae1	Paenibacillus	OTU_2246 (unc_Paenibacillus)
OTU_2299	Bacteria	Proteobacteria	Deltaproteobacteria	Myxococcales	Polyangiaceae	unc_Polyangiaceae	OTU_2299 (unc_Polyangiaceae)
OTU_2912	Bacteria	Acidobacteria	Acidobacteria	unc_Acidobacteria	unc_Acidobacteria	unc_Acidobacteria	OTU_2912 (unc_Acidobacteria)
OTU_2391	Bacteria	Proteobacteria	Betaproteobacteria	Burkholderiales	unc_Burkholderiales	unc_Burkholderiales	OTU_2391 (unc_Burkholderiales)
OTU_4953	Archaea	Euryarchaeota	Thermoplasmata	Methanomassiliicoccales	Methanomassiliicoccaceae	Methanomassiliicoccus	OTU_4953 (unc_Methanomassiliicoccus)
OTU_1588	Bacteria	Firmicutes	Bacilli	Bacillales	Paenibacillaceae1	Paenibacillus	OTU_1588 (unc_Paenibacillus)
OTU_3274	Bacteria	unc_Bacteria	unc_Bacteria	unc_Bacteria	unc_Bacteria	unc_Bacteria	OTU_3274 (unc_Bacteria)
OTU_3117	Bacteria	unc_Bacteria	unc_Bacteria	unc_Bacteria	unc_Bacteria	unc_Bacteria	OTU_3117 (unc_Bacteria)
OTU_2128	Bacteria	unc_Bacteria	unc_Bacteria	unc_Bacteria	unc_Bacteria	unc_Bacteria	OTU_2128 (unc_Bacteria)
OTU_1547	Bacteria	candidate division WPS-1	WPS-1_genera_incertae_sedis	WPS-1_genera_incertae_sedis	WPS-1_genera_incertae_sedis	WPS-1_genera_incertae_sedis	OTU_1547 (unc_WPS-1_genera_incertae_sedis)
OTU_9835	Bacteria	unc_Bacteria	unc_Bacteria	unc_Bacteria	unc_Bacteria	unc_Bacteria	OTU_9835 (unc_Bacteria)
OTU_2032	Bacteria	Proteobacteria	Gammaproteobacteria	Xanthomonadales	Xanthomonadaceae	Lysobacter	OTU_2032 (unc_Lysobacter)
OTU_1028	Bacteria	Actinobacteria	Actinobacteria	Streptosporangiales	Streptosporangiaceae	Thermopolyspora	OTU_1028 (unc_Thermopolyspora)
OTU_2075	Bacteria	Gemmatimonadetes	Gemmatimonadetes	Gemmatimonadales	Gemmatimonadaceae	unc_Gemmatimonadaceae	OTU_2075 (unc_Gemmatimonadaceae)
OTU_3997	Bacteria	Verrucomicrobia	Spartobacteria	Spartobacteria_genera_incertae_sedis	Spartobacteria_genera_incertae_sedis	Spartobacteria_genera_incertae_sedis	OTU_3997 (unc_Spartobacteria_genera_incertae_sedis)
OTU_1710	Bacteria	Proteobacteria	Alphaproteobacteria	Rhodospirillales	unc_Rhodospirillales	unc_Rhodospirillales	OTU_1710 (unc_Rhodospirillales)
OTU_2549	Bacteria	Acidobacteria	Acidobacteria	unc_Acidobacteria	unc_Acidobacteria	Gp16	OTU_2549 (uncultured_Acidobacteria)
OTU_3263	Bacteria	Acidobacteria	Acidobacteria_Gp20	Gp20	Gp20	Gp20	OTU_3263 (unc_Gp20)
OTU_1900	Bacteria	Acidobacteria	Acidobacteria_Gp10	Gp10	Gp10	Gp10	OTU_1900 (unc_Gp10)
OTU_5811	Bacteria	Acidobacteria	Acidobacteria_Gp6	Gp6	Gp6	Gp6	OTU_5811 (unc_Gp6)
OTU_1587	Bacteria	Firmicutes	Bacilli	Bacillales	Paenibacillaceae1	Brevibacillus	OTU_1587 (unc_Brevibacillus)
OTU_3393	Bacteria	unc_Bacteria	unc_Bacteria	unc_Bacteria	unc_Bacteria	unc_Bacteria	OTU_3393 (unc_Bacteria)
OTU_1860	Bacteria	Actinobacteria	unc_Actinobacteria	unc_Actinobacteria	unc_Actinobacteria	unc_Actinobacteria	OTU_1860 (unc_Actinobacteria)
OTU_1792	Bacteria	Firmicutes	Bacilli	Bacillales	Bacillaceae1	unc_Bacillaceae1	OTU_1792 (unc_Bacillaceae1)
OTU_2079	Bacteria	Armatimonadetes	Armatimonadia	Armatimonadales	Armatimonadaceae	Armatimonas/Armatimonadetes_gp1	OTU_2079 (unc_Armatimonas/Armatimonadetes_gp1)
OTU_4150	Bacteria	Acidobacteria	Acidobacteria_Gp6	Gp6	Gp6	Gp6	OTU_4150 (unc_Gp6)
OTU_3197	Bacteria	Gemmatimonadetes	Gemmatimonadetes	Gemmatimonadales	Gemmatimonadaceae	unc_Gemmatimonadaceae	OTU_3197 (unc_Gemmatimonadaceae)
OTU_1505	Bacteria	Acidobacteria	unc_Acidobacteria	unc_Acidobacteria	unc_Acidobacteria	unc_Acidobacteria	OTU_1505 (unc_Acidobacteria)
OTU_4290	Bacteria	Proteobacteria	Deltaproteobacteria	Myxococcales	unc_Myxococcales	unc_Myxococcales	OTU_4290 (unc_Myxococcales)
OTU_3471	Bacteria	Proteobacteria	Deltaproteobacteria	Myxococcales	Kofleriaceae	Kofleria	OTU_3471 (unc_Kofleria)
OTU_2533	Bacteria	Verrucomicrobia	Subdivision3	Subdivision3_genera_incertae_sedis	Subdivision3_genera_incertae_sedis	Subdivision3_genera_incertae_sedis	OTU_2533 (unc_Subdivision3_genera_incertae_sedis)
OTU_9652	Bacteria	Actinobacteria	Thermoleophilia	Solirubrobacterales	unc_Solirubrobacterales	unc_Solirubrobacterales	OTU_9652 (unc_Solirubrobacterales)
OTU_1682	Bacteria	Bacteroidetes	Chitinophagia	Chitinophagales	Chitinophagaceae	Flavisolibacter	OTU_1682 (unc_Flavisolibacter)
OTU_1874	Bacteria	Armatimonadetes	Armatimonadia	Armatimonadales	Armatimonadaceae	Armatimonas/Armatimonadetes_gp1	OTU_1874 (unc_Armatimonas/Armatimonadetes_gp1)
OTU_2480	Bacteria	Bacteroidetes	Chitinophagia	Chitinophagales	Chitinophagaceae	Ferruginibacter	OTU_2480 (unc_Ferruginibacter)
OTU_8975	Bacteria	Acidobacteria	Acidobacteria_Gp6	Gp6	Gp6	Gp6	OTU_8975 (unc_Gp6)
OTU_2244	Bacteria	Proteobacteria	Gammaproteobacteria	Xanthomonadales	Rhodanobacteraceae	Dyella	OTU_2244 (unc_Dyella)
OTU_1639	Bacteria	Firmicutes	Clostridia	Clostridiales	Heliobacteriaceae	Hydrogenispora	OTU_1639 (unc_Hydrogenispora)
OTU_2321	Bacteria	Proteobacteria	unc_Proteobacteria	unc_Proteobacteria	unc_Proteobacteria	unc_Proteobacteria	OTU_2321 (unc_Proteobacteria)
OTU_8774	Bacteria	Acidobacteria	Acidobacteria_Gp6	Gp6	Gp6	Gp6	OTU_8774 (unc_Gp6)
OTU_2023	Bacteria	unc_Bacteria	unc_Bacteria	unc_Bacteria	unc_Bacteria	unc_Bacteria	OTU_2023 (unc_Bacteria)
OTU_1638	Bacteria	unc_Bacteria	unc_Bacteria	unc_Bacteria	unc_Bacteria	unc_Bacteria	OTU_1638 (unc_Bacteria)
OTU_1907	Bacteria	Acidobacteria	Acidobacteria_Gp16	Gp16	Gp16	Gp16	OTU_1907 (unc_Gp16)
OTU_1471	Bacteria	Firmicutes	Limnochordia	Limnochordales	Limnochordaceae	Limnochorda	OTU_1471 (Limnochorda_pilosa)
OTU_9603	Bacteria	Actinobacteria	Actinobacteria	Propionibacteriales	Nocardioidaceae	Nocardioides	OTU_9603 (unc_Nocardioides)
OTU_1234	Bacteria	Proteobacteria	Deltaproteobacteria	unc_Deltaproteobacteria	unc_Deltaproteobacteria	unc_Deltaproteobacteria	OTU_1234 (unc_Deltaproteobacteria)
OTU_3798	Bacteria	Acidobacteria	Acidobacteria_Gp5	Gp5	Gp5	Gp5	OTU_3798 (unc_Gp5)
OTU_3280	Bacteria	unc_Bacteria	unc_Bacteria	unc_Bacteria	unc_Bacteria	unc_Bacteria	OTU_3280 (unc_Bacteria)
OTU_2679	Bacteria	Actinobacteria	Thermoleophilia	Solirubrobacterales	unc_Solirubrobacterales	unc_Solirubrobacterales	OTU_2679 (unc_Solirubrobacterales)
OTU_1696	Bacteria	Armatimonadetes	Chthonomonadetes	Chthonomonadales	Chthonomonadaceae	Chthonomonas/Armatimonadetes	OTU_1696 (uncultured_bacterium)
OTU_4623	Bacteria	Gemmatimonadetes	unc_Gemmatimonadetes	unc_Gemmatimonadetes	unc_Gemmatimonadetes	unc_Gemmatimonadetes	OTU_4623 (unc_Gemmatimonadetes)
OTU_7471	Bacteria	Verrucomicrobia	Spartobacteria	Spartobacteria_genera_incertae_sedis	Spartobacteria_genera_incertae_sedis	Spartobacteria_genera_incertae_sedis	OTU_7471 (unc_Spartobacteria_genera_incertae_sedis)
OTU_2297	Bacteria	unc_Bacteria	unc_Bacteria	unc_Bacteria	unc_Bacteria	unc_Bacteria	OTU_2297 (unc_Bacteria)
OTU_3391	Bacteria	Verrucomicrobia	Spartobacteria	Spartobacteria_genera_incertae_sedis	Spartobacteria_genera_incertae_sedis	Spartobacteria_genera_incertae_sedis	OTU_3391 (unc_Spartobacteria_genera_incertae_sedis)
OTU_2352	Bacteria	Actinobacteria	unc_Actinobacteria	unc_Actinobacteria	unc_Actinobacteria	unc_Actinobacteria	OTU_2352 (unc_Actinobacteria)
OTU_2282	Bacteria	Bacteroidetes	Cytophagia	Cytophagales	Cytophagaceae	Rhodocytophaga	OTU_2282 (Rhodocytophaga_aerolata)
OTU_3425	Bacteria	Proteobacteria	Alphaproteobacteria	Rhizobiales	unc_Rhizobiales	unc_Rhizobiales	OTU_3425 (unc_Rhizobiales)
OTU_2188	Bacteria	Candidatus Saccharibacteria	Saccharibacteria_genera_incertae_sedis	Saccharibacteria_genera_incertae_sedis	Saccharibacteria_genera_incertae_sedis	Saccharibacteria_genera_incertae_sedis	OTU_2188 (unc_Saccharibacteria_genera_incertae_sedis)
OTU_2959	Bacteria	Acidobacteria	Acidobacteria_Gp3	Gp3	Gp3	Gp3	OTU_2959 (unc_Gp3)
OTU_3744	Bacteria	Gemmatimonadetes	Gemmatimonadetes	Gemmatimonadales	Gemmatimonadaceae	unc_Gemmatimonadaceae	OTU_3744 (unc_Gemmatimonadaceae)
OTU_1972	Bacteria	Bacteroidetes	Chitinophagia	Chitinophagales	Chitinophagaceae	Segetibacter	OTU_1972 (Segetibacter_aerophilus)
OTU_3888	Bacteria	Firmicutes	Negativicutes	Selenomonadales	Sporomusaceae	Sporomusa	OTU_3888 (unc_Sporomusa)
OTU_2884	Bacteria	Acidobacteria	Acidobacteria_Gp15	Gp15	Gp15	Gp15	OTU_2884 (unc_Gp15)
OTU_2535	Bacteria	unc_Bacteria	unc_Bacteria	unc_Bacteria	unc_Bacteria	unc_Bacteria	OTU_2535 (unc_Bacteria)
OTU_2248	Bacteria	Nitrospirae	Nitrospira	Nitrospirales	Nitrospiraceae	Nitrospira	OTU_2248 (unc_Nitrospira)
OTU_2081	Bacteria	Proteobacteria	Deltaproteobacteria	Myxococcales	unc_Myxococcales	unc_Myxococcales	OTU_2081 (unc_Myxococcales)
OTU_3989	Bacteria	candidate division WPS-1	WPS-1_genera_incertae_sedis	WPS-1_genera_incertae_sedis	WPS-1_genera_incertae_sedis	WPS-1_genera_incertae_sedis	OTU_3989 (unc_WPS-1_genera_incertae_sedis)
OTU_1999	Bacteria	Firmicutes	Clostridia	unc_Clostridia	unc_Clostridia	unc_Clostridia	OTU_1999 (unc_Clostridia)
OTU_2763	Bacteria	unc_Bacteria	unc_Bacteria	unc_Bacteria	unc_Bacteria	unc_Bacteria	OTU_2763 (unc_Bacteria)
OTU_1401	Bacteria	Chlamydiae	Chlamydiia	Chlamydiales	Parachlamydiaceae	unc_Parachlamydiaceae	OTU_1401 (unc_Parachlamydiaceae)
OTU_2787	Bacteria	unc_Bacteria	unc_Bacteria	unc_Bacteria	unc_Bacteria	unc_Bacteria	OTU_2787 (unc_Bacteria)
OTU_1062	Bacteria	Firmicutes	Clostridia	Clostridiales	Clostridiales_incertae	Proteiniborus	OTU_1062 (unc_Proteiniborus)
OTU_1813	Bacteria	Proteobacteria	Alphaproteobacteria	Rhizobiales	unc_Rhizobiales	unc_Rhizobiales	OTU_1813 (unc_Rhizobiales)
OTU_3315	Bacteria	Acidobacteria	Acidobacteria	unc_Acidobacteria	unc_Acidobacteria	unc_Acidobacteria	OTU_3315 (unc_Acidobacteria)
OTU_7072	Bacteria	Proteobacteria	Deltaproteobacteria	Myxococcales	Polyangiaceae	unc_Polyangiaceae	OTU_7072 (unc_Polyangiaceae)
OTU_3223	Bacteria	Acidobacteria	Acidobacteria_Gp10	Gp10	Gp10	Gp10	OTU_3223 (unc_Gp10)
OTU_3655	Bacteria	Proteobacteria	Betaproteobacteria	Burkholderiales	Oxalobacteraceae	Noviherbaspirillum	OTU_3655 (unc_Noviherbaspirillum)
OTU_2674	Bacteria	Latescibacteria	Latescibacteria_genera_incertae_sedis	Latescibacteria_genera_incertae_sedis	Latescibacteria_genera_incertae_sedis	Latescibacteria_genera_incertae_sedis	OTU_2674 (unc_Latescibacteria_genera_incertae_sedis)
OTU_2836	Bacteria	Proteobacteria	Alphaproteobacteria	Rhodospirillales	Acetobacteraceae	unc_Acetobacteraceae	OTU_2836 (unc_Acetobacteraceae)
OTU_4690	Bacteria	Firmicutes	Bacilli	Bacillales	Paenibacillaceae1	Paenibacillus	OTU_4690 (unc_Paenibacillus)
OTU_3448	Bacteria	Acidobacteria	Acidobacteria_Gp3	Gp3	Gp3	Gp3	OTU_3448 (unc_Gp3)
OTU_4168	Bacteria	Firmicutes	Negativicutes	Selenomonadales	Sporomusaceae	Sporomusa	OTU_4168 (unc_Sporomusa)
OTU_4663	Bacteria	Proteobacteria	Deltaproteobacteria	Myxococcales	Kofleriaceae	Kofleria	OTU_4663 (unc_Kofleria)
OTU_1943	Bacteria	Candidatus Saccharibacteria	Saccharibacteria_genera_incertae_sedis	Saccharibacteria_genera_incertae_sedis	Saccharibacteria_genera_incertae_sedis	Saccharibacteria_genera_incertae_sedis	OTU_1943 (unc_Saccharibacteria_genera_incertae_sedis)
OTU_3379	Bacteria	Verrucomicrobia	Subdivision3	Subdivision3_genera_incertae_sedis	Subdivision3_genera_incertae_sedis	Subdivision3_genera_incertae_sedis	OTU_3379 (unc_Subdivision3_genera_incertae_sedis)
OTU_6491	Bacteria	unc_Bacteria	unc_Bacteria	unc_Bacteria	unc_Bacteria	unc_Bacteria	OTU_6491 (unc_Bacteria)
OTU_3613	Bacteria	Gemmatimonadetes	Gemmatimonadetes	Gemmatimonadales	Gemmatimonadaceae	Roseisolibacter	OTU_3613 (Roseisolibacter_agri)
OTU_2470	Bacteria	Acidobacteria	Acidobacteria_Gp7	Gp7	Gp7	Gp7	OTU_2470 (unc_Gp7)
OTU_1665	Bacteria	unc_Bacteria	unc_Bacteria	unc_Bacteria	unc_Bacteria	unc_Bacteria	OTU_1665 (unc_Bacteria)
OTU_2565	Bacteria	BRC1	BRC1_genera_incertae_sedis	BRC1_genera_incertae_sedis	BRC1_genera_incertae_sedis	BRC1_genera_incertae_sedis	OTU_2565 (unc_BRC1_genera_incertae_sedis)
OTU_8758	Bacteria	Gemmatimonadetes	Gemmatimonadetes	Gemmatimonadales	Gemmatimonadaceae	unc_Gemmatimonadaceae	OTU_8758 (unc_Gemmatimonadaceae)
OTU_4361	Bacteria	unc_Bacteria	unc_Bacteria	unc_Bacteria	unc_Bacteria	unc_Bacteria	OTU_4361 (unc_Bacteria)
OTU_2014	Bacteria	Verrucomicrobia	Subdivision3	Subdivision3_genera_incertae_sedis	Subdivision3_genera_incertae_sedis	Subdivision3_genera_incertae_sedis	OTU_2014 (unc_Subdivision3_genera_incertae_sedis)
OTU_2377	Bacteria	Actinobacteria	Thermoleophilia	Solirubrobacterales	unc_Solirubrobacterales	unc_Solirubrobacterales	OTU_2377 (unc_Solirubrobacterales)
OTU_7672	Bacteria	unc_Bacteria	unc_Bacteria	unc_Bacteria	unc_Bacteria	unc_Bacteria	OTU_7672 (unc_Bacteria)
OTU_1000	Bacteria	Actinobacteria	Acidimicrobiia	Acidimicrobiales	Iamiaceae	unc_Iamiaceae	OTU_1000 (unc_Iamiaceae)
OTU_2114	Bacteria	Proteobacteria	Deltaproteobacteria	Myxococcales	unc_Myxococcales	unc_Myxococcales	OTU_2114 (unc_Myxococcales)
OTU_3789	Bacteria	unc_Bacteria	unc_Bacteria	unc_Bacteria	unc_Bacteria	unc_Bacteria	OTU_3789 (unc_Bacteria)
OTU_1684	Bacteria	Proteobacteria	Alphaproteobacteria	Rhizobiales	unc_Rhizobiales	unc_Rhizobiales	OTU_1684 (unc_Rhizobiales)
OTU_2176	Bacteria	unc_Bacteria	unc_Bacteria	unc_Bacteria	unc_Bacteria	unc_Bacteria	OTU_2176 (unc_Bacteria)
OTU_2511	Bacteria	Proteobacteria	Alphaproteobacteria	Sphingomonadales	Sphingosinicellaceae	Sphingoaurantiacus	OTU_2511 (unc_Sphingoaurantiacus)
OTU_8775	Bacteria	Proteobacteria	Gammaproteobacteria	Gammaproteobacteria_incertae	unc_Gammaproteobacteria_incertae	Acidibacter	OTU_8775 (Acidibacter_ferrireducens)
OTU_1800	Bacteria	unc_Bacteria	unc_Bacteria	unc_Bacteria	unc_Bacteria	unc_Bacteria	OTU_1800 (unc_Bacteria)
OTU_2689	Bacteria	Acidobacteria	Acidobacteria_Gp3	Gp3	Gp3	Gp3	OTU_2689 (unc_Gp3)
OTU_1097	Bacteria	Acidobacteria	Acidobacteria_Gp6	Gp6	Gp6	Gp6	OTU_1097 (unc_Gp6)
OTU_2347	Bacteria	Chloroflexi	Caldilineae	Caldilineales	Caldilineaceae	Litorilinea	OTU_2347 (unc_Litorilinea)
OTU_2989	Bacteria	Bacteroidetes	Chitinophagia	Chitinophagales	Chitinophagaceae	unc_Chitinophagaceae	OTU_2989 (unc_Chitinophagaceae)
OTU_3865	Bacteria	Proteobacteria	Gammaproteobacteria	Xanthomonadales	Xanthomonadaceae	Lysobacter	OTU_3865 (unc_Lysobacter)
OTU_2192	Bacteria	Proteobacteria	Deltaproteobacteria	Myxococcales	unc_Myxococcales	unc_Myxococcales	OTU_2192 (unc_Myxococcales)
OTU_1497	Bacteria	Candidatus Saccharibacteria	Saccharibacteria_genera_incertae_sedis	Saccharibacteria_genera_incertae_sedis	Saccharibacteria_genera_incertae_sedis	Saccharibacteria_genera_incertae_sedis	OTU_1497 (unc_Saccharibacteria_genera_incertae_sedis)
OTU_1067	Archaea	Thaumarchaeota	unc_Thaumarchaeota	Nitrososphaerales	Nitrososphaeraceae	Nitrososphaera	OTU_1067 (Nitrososphaera_viennensis)
OTU_3659	Bacteria	unc_Bacteria	unc_Bacteria	unc_Bacteria	unc_Bacteria	unc_Bacteria	OTU_3659 (unc_Bacteria)
OTU_2582	Bacteria	Acidobacteria	Acidobacteria_Gp7	Gp7	Gp7	Gp7	OTU_2582 (unc_Gp7)
OTU_1474	Bacteria	Actinobacteria	unc_Actinobacteria	unc_Actinobacteria	unc_Actinobacteria	unc_Actinobacteria	OTU_1474 (unc_Actinobacteria)
OTU_8599	Bacteria	Verrucomicrobia	Spartobacteria	Spartobacteria_genera_incertae_sedis	Spartobacteria_genera_incertae_sedis	Spartobacteria_genera_incertae_sedis	OTU_8599 (unc_Spartobacteria_genera_incertae_sedis)
OTU_846	Bacteria	Proteobacteria	Betaproteobacteria	unc_Betaproteobacteria	unc_Betaproteobacteria	unc_Betaproteobacteria	OTU_846 (unc_Betaproteobacteria)
OTU_3578	Bacteria	Proteobacteria	Deltaproteobacteria	Myxococcales	unc_Myxococcales	unc_Myxococcales	OTU_3578 (unc_Myxococcales)
OTU_1617	Bacteria	Actinobacteria	Thermoleophilia	Solirubrobacterales	unc_Solirubrobacterales	unc_Solirubrobacterales	OTU_1617 (unc_Solirubrobacterales)
OTU_2278	Bacteria	unc_Bacteria	unc_Bacteria	unc_Bacteria	unc_Bacteria	unc_Bacteria	OTU_2278 (unc_Bacteria)
OTU_1188	Bacteria	Bacteroidetes	Chitinophagia	Chitinophagales	Chitinophagaceae	Parasegetibacter	OTU_1188 (unc_Parasegetibacter)
OTU_1560	Bacteria	Bacteroidetes	Chitinophagia	Chitinophagales	Chitinophagaceae	unc_Chitinophagaceae	OTU_1560 (unc_Chitinophagaceae)
OTU_1531	Bacteria	Acidobacteria	Acidobacteria_Gp6	Gp6	Gp6	Gp6	OTU_1531 (unc_Gp6)
OTU_4682	Bacteria	Actinobacteria	Actinobacteria	Micromonosporales	Micromonosporaceae	unc_Micromonosporaceae	OTU_4682 (unc_Micromonosporaceae)
OTU_2703	Bacteria	Actinobacteria	Acidimicrobiia	Acidimicrobiales	Iamiaceae	Iamia	OTU_2703 (unc_Iamia)
OTU_2524	Bacteria	Chloroflexi	Chloroflexia	Chloroflexales	unc_Chloroflexales	unc_Chloroflexales	OTU_2524 (unc_Chloroflexales)
OTU_3221	Bacteria	unc_Bacteria	unc_Bacteria	unc_Bacteria	unc_Bacteria	unc_Bacteria	OTU_3221 (unc_Bacteria)
OTU_1112	Bacteria	Gemmatimonadetes	Gemmatimonadetes	Gemmatimonadales	Gemmatimonadaceae	unc_Gemmatimonadaceae	OTU_1112 (unc_Gemmatimonadaceae)
OTU_3167	Bacteria	Proteobacteria	Alphaproteobacteria	Rhodobacterales	Rhodobacteraceae	unc_Rhodobacteraceae	OTU_3167 (unc_Rhodobacteraceae)
OTU_3196	Bacteria	Acidobacteria	Acidobacteria_Gp7	Gp7	Gp7	Gp7	OTU_3196 (unc_Gp7)
OTU_2942	Bacteria	unc_Bacteria	unc_Bacteria	unc_Bacteria	unc_Bacteria	unc_Bacteria	OTU_2942 (unc_Bacteria)
OTU_743	Bacteria	Gemmatimonadetes	Gemmatimonadetes	Gemmatimonadales	Gemmatimonadaceae	Gemmatimonas	OTU_743 (unc_Gemmatimonas)
OTU_3358	Bacteria	Actinobacteria	Actinobacteria	Mycobacteriales	Nocardiaceae	Nocardia	OTU_3358 (Nocardia_endophytica)
OTU_255	Bacteria	Actinobacteria	Actinobacteria	Mycobacteriales	Nocardiaceae	Rhodococcus	OTU_255 (unc_Rhodococcus)
OTU_1840	Bacteria	Proteobacteria	Alphaproteobacteria	unc_Alphaproteobacteria	unc_Alphaproteobacteria	unc_Alphaproteobacteria	OTU_1840 (unc_Alphaproteobacteria)
OTU_1264	Bacteria	Actinobacteria	unc_Actinobacteria	unc_Actinobacteria	unc_Actinobacteria	unc_Actinobacteria	OTU_1264 (unc_Actinobacteria)
OTU_4893	Bacteria	Proteobacteria	Alphaproteobacteria	Rhodospirillales	Rhodospirillaceae	Dongia	OTU_4893 (unc_Dongia)
OTU_5551	Bacteria	Proteobacteria	Alphaproteobacteria	Rhodobacterales	Rhodobacteraceae	unc_Rhodobacteraceae	OTU_5551 (unc_Rhodobacteraceae)
OTU_2070	Bacteria	Firmicutes	Clostridia	Clostridiales	Tissierellaceae	unc_Tissierellaceae	OTU_2070 (unc_Tissierellaceae)
OTU_1918	Bacteria	Chloroflexi	Thermomicrobia	Sphaerobacterales	Sphaerobacteraceae	Sphaerobacter	OTU_1918 (unc_Sphaerobacter)
OTU_950	Bacteria	unc_Bacteria	unc_Bacteria	unc_Bacteria	unc_Bacteria	unc_Bacteria	OTU_950 (unc_Bacteria)
OTU_1719	Bacteria	Proteobacteria	Alphaproteobacteria	Rhodospirillales	Reyranellaceae	Reyranella	OTU_1719 (unc_Reyranella)
OTU_1979	Bacteria	Acidobacteria	Acidobacteria_Gp17	Gp17	Gp17	Gp17	OTU_1979 (unc_Gp17)
OTU_2390	Bacteria	unc_Bacteria	unc_Bacteria	unc_Bacteria	unc_Bacteria	unc_Bacteria	OTU_2390 (unc_Bacteria)
OTU_3182	Bacteria	Actinobacteria	Thermoleophilia	Gaiellales	Gaiellaceae	Gaiella	OTU_3182 (unc_Gaiella)
OTU_1862	Bacteria	unc_Bacteria	unc_Bacteria	unc_Bacteria	unc_Bacteria	unc_Bacteria	OTU_1862 (unc_Bacteria)
OTU_2025	Bacteria	Candidatus Saccharibacteria	Saccharibacteria_genera_incertae_sedis	Saccharibacteria_genera_incertae_sedis	Saccharibacteria_genera_incertae_sedis	Saccharibacteria_genera_incertae_sedis	OTU_2025 (unc_Saccharibacteria_genera_incertae_sedis)
OTU_4729	Bacteria	Proteobacteria	Deltaproteobacteria	unc_Deltaproteobacteria	unc_Deltaproteobacteria	unc_Deltaproteobacteria	OTU_4729 (unc_Deltaproteobacteria)
OTU_5831	Bacteria	Firmicutes	Bacilli	Bacillales	Paenibacillaceae1	Paenibacillus	OTU_5831 (unc_Paenibacillus)
OTU_6400	Bacteria	unc_Bacteria	unc_Bacteria	unc_Bacteria	unc_Bacteria	unc_Bacteria	OTU_6400 (unc_Bacteria)
OTU_3603	Bacteria	unc_Bacteria	unc_Bacteria	unc_Bacteria	unc_Bacteria	unc_Bacteria	OTU_3603 (unc_Bacteria)
OTU_2234	Bacteria	Proteobacteria	Deltaproteobacteria	Myxococcales	unc_Myxococcales	unc_Myxococcales	OTU_2234 (unc_Myxococcales)
OTU_2801	Bacteria	Firmicutes	Bacilli	Bacillales	Paenibacillaceae1	Paenibacillus	OTU_2801 (Paenibacillus_oryzae)
OTU_2219	Bacteria	Gemmatimonadetes	Gemmatimonadetes	Gemmatimonadales	Gemmatimonadaceae	unc_Gemmatimonadaceae	OTU_2219 (unc_Gemmatimonadaceae)
OTU_3267	Bacteria	Proteobacteria	Alphaproteobacteria	Caulobacterales	Caulobacteraceae	unc_Caulobacteraceae	OTU_3267 (unc_Caulobacteraceae)
OTU_2199	Bacteria	Proteobacteria	Betaproteobacteria	unc_Betaproteobacteria	unc_Betaproteobacteria	unc_Betaproteobacteria	OTU_2199 (unc_Betaproteobacteria)
OTU_2789	Bacteria	candidate division WPS-1	WPS-1_genera_incertae_sedis	WPS-1_genera_incertae_sedis	WPS-1_genera_incertae_sedis	WPS-1_genera_incertae_sedis	OTU_2789 (unc_WPS-1_genera_incertae_sedis)
OTU_1254	Bacteria	Acidobacteria	Acidobacteria_Gp17	Gp17	Gp17	Gp17	OTU_1254 (unc_Gp17)
OTU_2645	Bacteria	Gemmatimonadetes	Gemmatimonadetes	Gemmatimonadales	Gemmatimonadaceae	unc_Gemmatimonadaceae	OTU_2645 (unc_Gemmatimonadaceae)
OTU_8580	Bacteria	Firmicutes	Clostridia	Clostridiales	Lachnospiraceae	unc_Lachnospiraceae	OTU_8580 (unc_Lachnospiraceae)
OTU_2450	Bacteria	unc_Bacteria	unc_Bacteria	unc_Bacteria	unc_Bacteria	unc_Bacteria	OTU_2450 (unc_Bacteria)
OTU_4323	Bacteria	Proteobacteria	Betaproteobacteria	unc_Betaproteobacteria	unc_Betaproteobacteria	unc_Betaproteobacteria	OTU_4323 (unc_Betaproteobacteria)
OTU_4495	Bacteria	Proteobacteria	Deltaproteobacteria	Myxococcales	Kofleriaceae	Kofleria	OTU_4495 (Kofleria_flava)
OTU_9997	Bacteria	unc_Bacteria	unc_Bacteria	unc_Bacteria	unc_Bacteria	unc_Bacteria	OTU_9997 (unc_Bacteria)
OTU_4205	Bacteria	Proteobacteria	Alphaproteobacteria	Sphingomonadales	Erythrobacteraceae	Novosphingobium	OTU_4205 (unc_Novosphingobium)
OTU_3384	Bacteria	Actinobacteria	Thermoleophilia	Solirubrobacterales	unc_Solirubrobacterales	unc_Solirubrobacterales	OTU_3384 (unc_Solirubrobacterales)
OTU_4042	Bacteria	unc_Bacteria	unc_Bacteria	unc_Bacteria	unc_Bacteria	unc_Bacteria	OTU_4042 (unc_Bacteria)
OTU_3542	Bacteria	Acidobacteria	Acidobacteria_Gp10	Gp10	Gp10	Gp10	OTU_3542 (unc_Gp10)
OTU_989	Bacteria	Firmicutes	unc_Firmicutes	unc_Firmicutes	unc_Firmicutes	unc_Firmicutes	OTU_989 (unc_Firmicutes)
OTU_2241	Bacteria	Proteobacteria	Betaproteobacteria	unc_Betaproteobacteria	unc_Betaproteobacteria	unc_Betaproteobacteria	OTU_2241 (unc_Betaproteobacteria)
OTU_2762	Bacteria	Acidobacteria	Acidobacteria_Gp6	Gp6	Gp6	Gp6	OTU_2762 (unc_Gp6)
OTU_4559	Bacteria	Acidobacteria	Acidobacteria_Gp25	Gp25	Gp25	Gp25	OTU_4559 (unc_Gp25)
OTU_7699	Bacteria	Proteobacteria	Betaproteobacteria	Burkholderiales	Comamonadaceae	Polaromonas	OTU_7699 (unc_Polaromonas)
OTU_2002	Bacteria	Verrucomicrobia	Spartobacteria	Spartobacteria_genera_incertae_sedis	Spartobacteria_genera_incertae_sedis	Spartobacteria_genera_incertae_sedis	OTU_2002 (unc_Spartobacteria_genera_incertae_sedis)
OTU_9135	Bacteria	Verrucomicrobia	Spartobacteria	Spartobacteria_genera_incertae_sedis	Spartobacteria_genera_incertae_sedis	Spartobacteria_genera_incertae_sedis	OTU_9135 (unc_Spartobacteria_genera_incertae_sedis)
OTU_8978	Bacteria	Proteobacteria	Deltaproteobacteria	Myxococcales	unc_Myxococcales	unc_Myxococcales	OTU_8978 (unc_Myxococcales)
OTU_2453	Bacteria	Proteobacteria	Deltaproteobacteria	unc_Deltaproteobacteria	unc_Deltaproteobacteria	unc_Deltaproteobacteria	OTU_2453 (unc_Deltaproteobacteria)
OTU_2051	Bacteria	Actinobacteria	Actinobacteria	unc_Actinobacteria	unc_Actinobacteria	unc_Actinobacteria	OTU_2051 (unc_Actinobacteria)
OTU_437	Bacteria	unc_Bacteria	unc_Bacteria	unc_Bacteria	unc_Bacteria	unc_Bacteria	OTU_437 (unc_Bacteria)
OTU_2038	Bacteria	Gemmatimonadetes	Gemmatimonadetes	Gemmatimonadales	Gemmatimonadaceae	unc_Gemmatimonadaceae	OTU_2038 (unc_Gemmatimonadaceae)
OTU_3234	Bacteria	Proteobacteria	Deltaproteobacteria	Myxococcales	Polyangiaceae	unc_Polyangiaceae	OTU_3234 (unc_Polyangiaceae)
OTU_3289	Bacteria	Acidobacteria	Acidobacteria_Gp6	Gp6	Gp6	Gp6	OTU_3289 (unc_Gp6)
OTU_2036	Bacteria	unc_Bacteria	unc_Bacteria	unc_Bacteria	unc_Bacteria	unc_Bacteria	OTU_2036 (unc_Bacteria)
OTU_2862	Bacteria	Verrucomicrobia	Spartobacteria	Spartobacteria_genera_incertae_sedis	Spartobacteria_genera_incertae_sedis	Spartobacteria_genera_incertae_sedis	OTU_2862 (unc_Spartobacteria_genera_incertae_sedis)
OTU_2805	Bacteria	Chloroflexi	unc_Chloroflexi	unc_Chloroflexi	unc_Chloroflexi	unc_Chloroflexi	OTU_2805 (unc_Chloroflexi)
OTU_2034	Bacteria	Actinobacteria	Thermoleophilia	Gaiellales	Gaiellaceae	Gaiella	OTU_2034 (unc_Gaiella)
OTU_4261	Bacteria	Candidatus Saccharibacteria	Saccharibacteria_genera_incertae_sedis	Saccharibacteria_genera_incertae_sedis	Saccharibacteria_genera_incertae_sedis	Saccharibacteria_genera_incertae_sedis	OTU_4261 (unc_Saccharibacteria_genera_incertae_sedis)
OTU_2775	Bacteria	Acidobacteria	Acidobacteria_Gp2	Gp2	Gp2	Gp2	OTU_2775 (unc_Gp2)
OTU_2456	Bacteria	Actinobacteria	Actinobacteria	unc_Actinobacteria	unc_Actinobacteria	unc_Actinobacteria	OTU_2456 (unc_Actinobacteria)
OTU_2798	Bacteria	Actinobacteria	Thermoleophilia	Gaiellales	Gaiellaceae	Gaiella	OTU_2798 (unc_Gaiella)
OTU_4797	Bacteria	Chloroflexi	unc_Chloroflexi	unc_Chloroflexi	unc_Chloroflexi	unc_Chloroflexi	OTU_4797 (unc_Chloroflexi)
OTU_3605	Bacteria	Proteobacteria	Gammaproteobacteria	Xanthomonadales	Xanthomonadaceae	Lysobacter	OTU_3605 (unc_Lysobacter)
OTU_3661	Bacteria	Proteobacteria	Alphaproteobacteria	Rhizobiales	unc_Rhizobiales	unc_Rhizobiales	OTU_3661 (unc_Rhizobiales)
OTU_8328	Bacteria	Proteobacteria	Alphaproteobacteria	Rhodospirillales	Acetobacteraceae	Rhodopila	OTU_8328 (unc_Rhodopila)
OTU_2542	Bacteria	unc_Bacteria	unc_Bacteria	unc_Bacteria	unc_Bacteria	unc_Bacteria	OTU_2542 (unc_Bacteria)
OTU_2658	Bacteria	Verrucomicrobia	Spartobacteria	Spartobacteria_genera_incertae_sedis	Spartobacteria_genera_incertae_sedis	Spartobacteria_genera_incertae_sedis	OTU_2658 (unc_Spartobacteria_genera_incertae_sedis)
OTU_2639	Bacteria	Firmicutes	Bacilli	Bacillales	Paenibacillaceae1	Paenibacillus	OTU_2639 (unc_Paenibacillus)
OTU_2934	Bacteria	Actinobacteria	Thermoleophilia	Solirubrobacterales	unc_Solirubrobacterales	unc_Solirubrobacterales	OTU_2934 (unc_Solirubrobacterales)
OTU_3568	Bacteria	Actinobacteria	Thermoleophilia	Solirubrobacterales	unc_Solirubrobacterales	unc_Solirubrobacterales	OTU_3568 (unc_Solirubrobacterales)
OTU_3381	Bacteria	Chloroflexi	unc_Chloroflexi	unc_Chloroflexi	unc_Chloroflexi	unc_Chloroflexi	OTU_3381 (unc_Chloroflexi)
OTU_2157	Bacteria	unc_Bacteria	unc_Bacteria	unc_Bacteria	unc_Bacteria	unc_Bacteria	OTU_2157 (unc_Bacteria)
OTU_2346	Bacteria	Gemmatimonadetes	Gemmatimonadetes	Gemmatimonadales	Gemmatimonadaceae	Gemmatimonas	OTU_2346 (unc_Gemmatimonas)
OTU_1567	Bacteria	Firmicutes	Clostridia	Clostridiales	Clostridiaceae 2	Alkaliphilus	OTU_1567 (unc_Alkaliphilus)
OTU_3297	Bacteria	unc_Bacteria	unc_Bacteria	unc_Bacteria	unc_Bacteria	unc_Bacteria	OTU_3297 (unc_Bacteria)
OTU_4901	Bacteria	Proteobacteria	Betaproteobacteria	Burkholderiales	Oxalobacteraceae	Noviherbaspirillum	OTU_4901 (unc_Noviherbaspirillum)
[truncated: 4,867 more rows]

## Sheet: OTUs
	Karasuk 1	Karasuk 2	Karasuk 3	Karasuk 4	Novosibirsk 1	Novosibirsk 2	Novosibirsk 3	Novosibirsk 4	Toguchin 1	Toguchin 2	Toguchin 3	Toguchin 4
OTU_14 (unc_Gp16)	1913	1557	1948	1217	3077	4157	4219	3561	1276	1636	1874	1643
OTU_10 (unc_Actinobacteria)	0	0	0	0	1954	2690	3202	3042	1228	1226	1041	1044
OTU_7 (unc_Pseudarthrobacter)	1496	782	441	1493	1153	1896	2024	2350	555	578	667	573
OTU_80 (unc_Gp16)	963	666	797	811	1240	1159	1102	1133	276	315	347	407
OTU_70 (unc_Gp16)	0	0	0	307	1472	1602	1445	1433	578	368	559	324
OTU_33 (unc_Gp16)	1737	1347	2176	938	403	433	471	426	162	177	173	198
OTU_71 (unc_Gp6)	701	930	522	335	289	338	408	365	799	1082	1001	1203
OTU_61 (unc_Gp16)	2109	2632	963	417	505	600	520	510	0	0	0	0
OTU_49 (unc_Gemmatimonadetes)	742	1019	850	794	394	511	571	524	677	525	639	584
OTU_51 (unc_Blastococcus)	634	458	370	854	506	878	786	702	367	486	456	491
OTU_53 (unc_Gp4)	0	0	925	1714	166	357	199	320	674	697	771	957
OTU_57 (unc_Actinobacteria)	0	0	0	0	1001	1229	1779	1628	0	0	0	0
OTU_11 (unc_Bradyrhizobium)	1050	2155	1201	641	0	0	0	0	326	627	453	723
OTU_48 (unc_Sphingomonas)	1346	1248	833	1199	248	390	280	219	202	223	213	254
OTU_64 (unc_Streptomyces)	1084	958	694	680	249	383	294	291	437	446	573	451
OTU_22 (unc_Microlunatus)	367	0	0	0	0	0	0	0	1224	1688	1324	1954
OTU_32 (unc_Gaiella)	0	0	0	0	0	0	361	357	1478	1406	1023	1388
OTU_25 (unc_Actinobacteria)	0	0	0	0	419	452	680	633	797	917	745	885
OTU_127 (unc_Gp16)	0	0	0	0	700	982	878	712	194	241	278	310
OTU_78 (unc_Nonomuraea)	1111	1193	815	752	0	0	68	0	195	201	181	120
OTU_52 (unc_Bacillus)	521	422	396	484	113	0	0	0	389	436	835	593
OTU_72 (unc_Gp6)	861	1520	1618	470	0	0	0	0	0	0	0	0
OTU_34 (unc_Rhizobiales)	270	389	309	0	0	0	0	0	707	789	754	909
OTU_109 (unc_Gp6)	265	94	346	462	79	112	119	125	439	473	628	719
OTU_36 (unc_Gp10)	2306	1995	0	0	0	0	0	0	0	0	0	0
OTU_167 (unc_Solirubrobacter)	360	281	282	410	235	298	213	179	294	310	262	302
OTU_30 (unc_Actinobacteria)	196	0	187	170	183	284	246	195	355	490	456	592
OTU_128 (unc_Gp6)	0	0	0	0	278	384	347	284	565	462	424	414
OTU_113 (unc_Bacteria)	802	840	809	496	0	0	0	0	94	127	173	173
OTU_90 (unc_Solirubrobacterales)	178	142	239	229	164	215	207	179	401	397	335	367
OTU_55 (unc_Acidobacteria)	124	0	301	495	183	346	348	366	260	143	179	149
OTU_47 (unc_Rubrobacter)	0	0	0	0	177	302	342	182	453	491	499	453
OTU_195 (unc_Streptomyces)	736	966	337	751	0	112	104	0	0	0	195	129
OTU_40 (Gaiella_occulta)	243	0	342	326	0	0	0	0	567	594	411	610
OTU_155 (unc_Gaiella)	918	1240	653	547	0	0	0	0	0	0	0	0
OTU_38 (unc_Peribacillus)	251	150	178	154	152	141	127	101	406	379	429	366
OTU_59 (unc_Gp6)	0	0	0	186	231	285	252	306	341	312	382	279
OTU_237 (unc_Gp6)	0	0	0	0	167	241	327	264	641	390	281	182
OTU_8060 (unc_Bacteria)	0	0	0	0	513	354	451	560	0	79	87	147
OTU_7827 (unc_Gp16)	0	0	0	0	446	608	564	507	0	0	0	0
OTU_149 (unc_Bacteria)	521	327	389	547	0	0	0	0	127	203	281	300
OTU_213 (unc_Gp6)	315	218	284	129	0	0	68	0	249	392	408	414
OTU_102 (unc_Gp6)	0	0	0	283	115	126	153	164	178	418	398	414
OTU_170 (unc_Gp6)	0	0	0	0	68	68	82	71	444	556	445	539
OTU_1766 (unc_Bacillus)	421	359	279	386	85	82	74	57	141	190	156	140
OTU_39 (unc_Streptosporangium)	431	470	318	298	0	0	89	120	179	182	200	149
OTU_271 (unc_Actinoplanes)	261	396	234	362	0	95	127	110	200	220	193	166
OTU_145 (unc_Gp6)	0	0	0	96	158	198	217	182	301	309	359	284
OTU_118 (unc_Intrasporangiaceae)	248	184	128	266	116	206	262	195	0	175	186	204
OTU_44 (unc_Neobacillus)	258	186	229	216	0	0	0	0	303	338	390	399
OTU_88 (Gaiella_occulta)	0	0	0	0	158	196	203	220	356	372	268	225
OTU_5172 (unc_Rhizobiales)	281	433	460	126	0	0	0	0	165	288	244	321
OTU_150 (unc_Thermoleophilia)	191	1612	451	257	0	0	0	0	0	0	0	0
OTU_589 (unc_Gp16)	0	0	0	0	123	194	185	220	307	369	251	262
OTU_67 (unc_Pseudonocardia)	478	465	346	328	0	66	61	0	99	116	115	112
OTU_110 (unc_Gp6)	0	0	0	0	138	165	162	123	325	322	330	327
OTU_295 (unc_Gp4)	0	0	0	0	135	250	159	253	281	312	158	270
OTU_125 (unc_Sporosarcina)	263	222	257	269	0	0	0	0	342	234	305	188
OTU_24 (unc_Solirubrobacterales)	0	0	0	0	150	196	190	165	285	338	269	219
OTU_41 (unc_Actinobacteria)	393	212	270	265	0	0	0	0	166	267	190	307
OTU_233 (unc_Solirubrobacterales)	649	325	642	318	0	0	0	0	53	0	73	61
OTU_69 (unc_Microvirga)	63	0	0	196	98	186	216	202	187	270	207	198
OTU_200 (unc_Gp6)	0	0	0	0	144	194	183	233	358	270	217	153
OTU_3565 (unc_Rubrobacter)	153	103	266	343	145	172	188	112	91	72	97	84
OTU_550 (unc_Gp6)	0	0	0	0	124	141	175	123	313	314	310	297
OTU_103 (unc_Gp4)	47	183	655	784	31	31	34	37	30	45	31	48
OTU_89 (unc_Gp1)	218	493	871	358	0	0	0	0	0	49	0	65
OTU_54 (unc_Actinobacteria)	0	0	0	0	212	234	304	188	185	229	121	188
OTU_104 (unc_Gp4)	0	0	0	0	167	205	151	223	328	265	196	139
OTU_86 (Povalibacter_uvarum)	0	0	101	371	42	65	69	71	264	260	286	272
OTU_992 (unc_Solirubrobacterales)	293	1025	499	211	0	0	0	0	0	60	0	0
OTU_236 (unc_Gaiella)	362	292	373	332	0	0	0	0	114	154	124	179
OTU_1027 (Gaiella_occulta)	108	121	303	245	126	141	174	186	68	79	81	66
OTU_111 (unc_Rhizobiales)	313	418	393	201	0	0	0	0	138	155	139	175
OTU_83 (unc_Gaiella)	0	92	78	0	114	122	131	120	266	271	228	275
OTU_66 (unc_Bacteria)	339	416	651	512	0	0	0	0	0	0	0	0
OTU_159 (unc_Skermanella)	0	0	0	210	84	145	199	261	135	150	208	225
OTU_114 (unc_Marmoricola)	257	267	119	341	117	206	198	123	0	0	71	0
OTU_169 (unc_Gp1)	324	1025	532	136	0	0	0	0	0	0	0	0
OTU_100 (unc_Mycobacterium)	270	279	119	221	0	0	0	0	145	288	246	252
OTU_376 (unc_Bacteria)	237	188	282	309	41	63	59	66	118	90	146	122
OTU_4412 (unc_Gp16)	208	179	148	115	139	170	139	159	89	90	79	95
OTU_108 (unc_Gaiella)	0	0	0	0	182	219	230	189	171	177	171	158
OTU_119 (unc_Gaiella)	238	950	553	196	0	0	0	0	0	0	0	0
OTU_247 (unc_Gp6)	92	79	90	55	76	64	85	85	269	293	278	160
OTU_27 (unc_Rhizobiales)	0	0	0	0	0	215	229	176	221	261	220	241
OTU_37 (unc_Gaiella)	119	247	247	116	0	0	0	0	167	261	194	366
OTU_164 (unc_Gp6)	0	0	0	0	125	171	155	169	281	206	210	163
OTU_106 (unc_Bacteria)	142	174	346	224	0	0	0	0	188	234	174	200
OTU_285 (unc_Gp6)	0	0	0	0	195	230	263	236	183	137	63	66
OTU_81 (unc_Pseudonocardia)	207	188	246	285	0	72	72	0	89	140	178	161
OTU_96 (unc_Gemmatimonadaceae)	674	440	314	328	0	0	0	0	0	0	0	0
OTU_132 (unc_Kribbella)	180	225	111	208	0	0	0	0	204	193	307	223
OTU_561 (unc_Acidobacteria)	279	520	233	232	0	0	0	0	46	112	115	149
OTU_73 (Rubrobacter_spartanus)	45	0	68	136	156	167	185	150	130	123	109	83
OTU_98 (unc_Solirubrobacterales)	334	352	276	275	0	0	0	0	101	96	81	111
OTU_147 (unc_Micromonosporaceae)	453	379	438	311	0	0	0	0	0	33	0	0
OTU_62 (Romboutsia_timonensis)	120	501	250	195	0	0	0	0	130	221	123	62
OTU_77 (unc_Gp1)	400	1089	158	94	0	0	0	0	0	0	0	0
OTU_126 (unc_Micromonospora)	451	476	151	145	0	0	0	0	99	131	103	55
OTU_207 (unc_Gp6)	269	549	318	163	0	48	58	41	55	0	54	0
OTU_79 (unc_Thermoleophilia)	146	167	151	104	0	0	0	0	202	249	221	246
OTU_122 (unc_Nocardioides)	94	65	50	152	160	277	240	204	0	0	0	0
OTU_136 (unc_Bacteria)	0	0	738	477	0	60	58	77	0	0	0	0
OTU_1044 (unc_Gp6)	63	70	65	114	76	84	88	87	205	152	184	137
OTU_218 (unc_Bacteria)	0	0	0	0	96	135	126	122	260	186	183	157
OTU_441 (unc_Gp6)	0	0	0	36	245	204	259	192	67	44	42	32
OTU_8409 (unc_Gaiella)	0	0	0	0	0	0	0	0	343	375	258	354
OTU_208 (unc_Betaproteobacteria)	164	204	206	221	0	0	0	0	82	125	181	206
OTU_453 (unc_Gp6)	31	0	104	140	127	124	103	138	86	105	108	117
OTU_264 (unc_Gp6)	68	49	18	30	164	163	232	152	101	72	57	37
OTU_177 (unc_Gaiella)	0	0	0	0	0	0	0	0	314	382	224	357
OTU_431 (unc_Thermanaerothrix)	0	0	0	0	131	141	221	196	196	67	113	27
OTU_436 (unc_Solirubrobacterales)	0	0	0	0	72	90	113	98	207	227	182	180
OTU_142 (unc_Gp3)	107	101	113	286	0	0	35	44	133	137	171	152
OTU_193 (unc_Anaerolineaceae)	0	61	61	0	40	64	63	57	215	249	214	187
OTU_600 (unc_Gp6)	0	0	0	0	155	147	149	163	88	116	127	138
OTU_513 (unc_Bacteria)	97	149	213	224	33	54	50	45	189	57	86	49
OTU_3896 (unc_Acidobacteria)	49	0	96	114	75	76	104	131	175	108	131	94
OTU_322 (unc_Betaproteobacteria)	439	498	213	70	0	0	0	0	41	38	34	52
OTU_381 (unc_Nocardioides)	355	570	290	160	0	0	0	0	0	0	0	0
OTU_8081 (unc_Ilumatobacteraceae)	0	0	0	0	97	108	118	103	191	204	166	116
OTU_590 (unc_Bacteria)	0	0	71	76	60	74	100	84	198	159	175	127
OTU_9276 (unc_Streptomyces)	22	21	43	39	135	260	158	207	27	50	25	37
OTU_323 (unc_Actinobacteria)	0	0	0	0	102	164	195	171	221	93	65	35
OTU_172 (unc_Acidobacteria)	189	99	468	299	0	0	0	0	51	56	45	41
OTU_388 (unc_Asanoa)	281	155	285	258	0	28	0	26	41	63	67	29
OTU_263 (unc_Rhodospirillales)	319	326	345	161	0	0	0	0	24	22	41	46
OTU_280 (unc_Gp6)	0	0	0	0	115	126	128	93	123	178	130	157
OTU_7645 (unc_Gp6)	0	0	0	62	61	90	107	92	98	174	210	193
OTU_309 (unc_Rhodospirillales)	337	358	306	257	0	0	0	0	0	23	0	0
OTU_933 (uncultured_Acidobacteria)	37	0	88	119	97	135	169	187	60	37	54	41
OTU_369 (unc_Chloroflexi)	44	40	45	133	95	147	129	128	94	51	79	61
OTU_180 (unc_Reyranella)	235	435	305	118	0	0	0	0	33	56	33	64
OTU_921 (unc_Betaproteobacteria)	81	119	134	62	53	73	81	101	152	80	111	66
OTU_558 (unc_Solirubrobacter)	186	234	210	243	38	0	44	0	53	76	69	45
OTU_112 (unc_Gaiella)	0	0	0	0	88	141	124	105	136	147	116	175
OTU_307 (unc_Bradyrhizobiaceae)	207	324	176	122	0	33	32	0	76	77	91	68
OTU_131 (unc_Peptostreptococcaceae)	117	341	194	158	0	0	0	0	99	148	88	61
OTU_273 (unc_Actinobacteria)	158	124	108	141	93	105	103	97	35	45	0	42
OTU_129 (Turicibacter_sanguinis)	158	331	74	85	0	0	0	0	140	163	137	104
OTU_293 (Acidibacter_ferrireducens)	181	144	276	349	0	18	18	23	35	32	34	40
OTU_353 (unc_Sporosarcina)	146	23	210	221	0	0	0	0	171	172	112	73
OTU_4229 (unc_Gp6)	138	237	279	160	0	0	28	0	38	79	77	136
OTU_256 (unc_Cystobacteraceae)	86	207	53	105	71	98	117	60	53	63	78	77
OTU_211 (unc_Gp3)	410	507	170	161	0	0	0	0	0	0	0	0
OTU_84 (unc_Gp6)	0	0	0	0	54	0	61	72	199	235	203	206
OTU_355 (unc_Gammaproteobacteria)	0	0	25	27	55	67	62	49	192	191	209	143
OTU_120 (unc_Gp6)	0	0	0	0	0	0	0	0	159	331	259	337
OTU_50 (unc_Spartobacteria_genera_incertae_sedis)	0	0	0	0	0	0	0	0	153	308	253	361
OTU_440 (unc_Gp6)	154	231	193	137	0	0	0	0	40	112	92	172
OTU_454 (unc_Kofleria)	312	103	110	100	30	0	35	26	35	72	161	101
OTU_257 (unc_Gp16)	25	0	57	55	173	150	136	127	42	46	38	45
OTU_181 (unc_Acidimicrobiales)	0	0	0	0	108	154	162	129	103	103	66	94
OTU_1509 (unc_Massilia)	77	64	0	582	0	29	36	0	56	90	62	58
OTU_879 (unc_Bradyrhizobiaceae)	52	76	135	79	0	77	61	74	135	111	96	125
OTU_123 (unc_Gemmatimonadaceae)	442	428	195	102	0	0	0	0	0	0	0	0
OTU_601 (unc_Gp6)	193	59	115	121	0	0	0	0	63	105	192	213
OTU_87 (unc_Acidimicrobiales)	0	0	0	0	43	76	75	55	155	183	168	211
OTU_413 (unc_Gp17)	0	0	0	0	101	205	196	194	68	34	40	23
OTU_466 (unc_Actinobacteria)	93	186	104	97	75	158	105	83	22	0	23	19
OTU_163 (unc_Chloroflexi)	0	0	0	64	70	102	141	89	139	65	165	76
OTU_244 (unc_Solirubrobacterales)	105	97	97	117	63	104	83	64	0	70	78	83
OTU_460 (unc_Actinobacteria)	0	0	0	14	173	189	198	222	0	0	0	0
OTU_2894 (unc_Aeromicrobium)	47	30	0	39	143	147	135	86	54	54	71	53
OTU_198 (unc_Bacteria)	708	168	80	114	0	0	0	0	0	0	0	19
OTU_378 (unc_Psychrobacillus)	140	180	116	129	29	0	0	0	139	95	97	93
OTU_891 (unc_Gaiella)	224	443	219	111	0	0	0	0	0	36	32	36
OTU_151 (unc_Actinobacteria)	0	0	0	0	167	179	182	234	13	0	0	0
OTU_1133 (unc_Solirubrobacterales)	47	42	62	42	0	58	63	45	183	166	125	118
OTU_219 (unc_Actinomadura)	350	226	154	180	0	0	0	0	22	0	87	22
OTU_423 (unc_Gp16)	0	0	0	0	106	102	128	109	139	87	90	75
OTU_6139 (unc_Micromonosporaceae)	106	128	65	117	74	94	64	78	35	37	66	41
OTU_225 (unc_Gemmatimonadaceae)	352	402	266	53	0	0	0	0	0	0	0	0
OTU_152 (unc_Bacteria)	0	0	0	0	73	135	152	110	114	87	85	78
OTU_359 (unc_Nocardioidaceae)	342	309	183	139	0	0	0	0	30	0	0	37
OTU_56 (unc_Hyphomicrobiaceae)	0	50	61	49	108	114	129	104	87	58	51	0
OTU_787 (unc_Mesorhizobium)	118	113	65	58	0	53	75	56	104	85	101	85
OTU_329 (unc_Rhizobiales)	125	138	113	66	0	48	50	44	84	120	56	85
OTU_1621 (unc_Streptomyces)	358	201	101	155	0	0	0	0	34	0	88	38
OTU_868 (unc_Bacteria)	0	0	0	0	136	179	165	139	60	21	20	10
OTU_760 (unc_Bacteria)	0	20	68	41	109	112	130	126	36	50	43	32
OTU_58 (unc_Sphingomonas)	0	0	0	0	0	178	0	0	160	188	172	154
OTU_308 (unc_Gp6)	0	0	0	0	126	84	119	146	145	95	12	21
OTU_232 (Nocardioides_islandensis)	57	47	0	61	104	124	131	114	35	35	37	29
OTU_829 (unc_Gp1)	212	248	267	179	0	0	0	0	14	0	22	16
OTU_468 (unc_Thermoleophilia)	41	38	0	38	75	87	105	100	99	70	54	90
OTU_97 (unc_Chloroflexi)	204	461	155	166	0	0	0	0	0	0	0	0
OTU_463 (unc_Acetobacteraceae)	311	383	178	83	0	0	0	0	0	0	0	21
OTU_9669 (unc_Gp16)	0	0	0	0	96	119	166	130	61	44	73	40
OTU_8827 (unc_Lentzea)	54	0	0	16	111	217	60	27	0	45	162	49
OTU_139 (unc_Iamiaceae)	0	0	0	0	89	180	176	173	45	39	0	0
OTU_121 (unc_Rhizobiales)	0	0	0	45	56	84	95	88	119	100	72	104
OTU_274 (unc_Microbispora)	159	364	86	101	0	0	22	0	48	43	48	49
OTU_74 (Nitrospira_japonica)	0	0	0	0	38	66	48	75	145	128	142	126
OTU_401 (unc_Gp6)	0	0	0	0	49	62	63	69	232	127	78	78
OTU_63 (unc_Clostridiumsensustricto)	0	0	0	35	0	0	0	0	56	149	312	265
OTU_368 (unc_Devosia)	128	106	35	41	65	58	57	54	55	52	81	47
OTU_489 (unc_Gp6)	0	0	0	0	38	53	50	28	77	202	111	207
OTU_321 (unc_Gp6)	65	0	92	97	0	0	0	0	104	136	163	152
OTU_91 (unc_Ilumatobacteraceae)	0	0	0	0	85	91	128	107	97	81	65	42
OTU_133 (unc_Rhodospirillales)	0	0	20	27	101	115	131	118	26	58	39	47
OTU_530 (unc_Paenibacillus)	76	58	49	36	45	84	73	68	77	66	50	58
OTU_303 (unc_Betaproteobacteria)	13	19	36	0	72	97	97	65	73	71	94	65
OTU_319 (unc_Litorilinea)	41	47	38	98	42	56	56	103	38	55	75	82
OTU_203 (unc_Tumebacillus)	52	116	218	184	0	39	65	54	0	31	0	28
OTU_235 (unc_Gp6)	192	138	184	131	0	0	0	0	0	0	64	114
OTU_242 (unc_Bacteria)	0	0	0	0	192	134	156	114	0	0	0	0
OTU_629 (unc_Gp6)	141	282	169	25	13	22	14	21	14	47	20	48
OTU_174 (unc_Hyphomicrobiaceae)	0	0	17	36	39	69	60	50	135	113	87	94
OTU_349 (unc_Nitrospira)	0	0	38	80	38	69	72	61	88	77	92	75
OTU_640 (unc_Gp6)	0	0	0	0	55	104	111	63	146	81	80	22
OTU_422 (unc_Stenotrophobacter)	167	171	135	220	0	0	0	0	0	19	46	36
OTU_765 (unc_Labilithrix)	57	88	158	168	19	15	32	34	43	41	53	32
OTU_162 (Stenotrophobacter_terrae)	0	0	0	74	43	73	45	60	99	95	105	79
OTU_628 (unc_Gaiella)	0	0	0	0	90	129	152	146	30	26	17	12
OTU_5470 (unc_Gaiella)	0	0	0	32	86	113	102	110	73	34	34	33
OTU_261 (unc_Gp6)	0	0	0	0	112	126	178	164	0	0	0	0
OTU_607 (unc_Gp6)	0	0	0	14	51	52	80	89	137	70	113	46
OTU_161 (unc_Hyphomicrobiaceae)	48	15	124	205	0	0	0	0	76	47	149	63
OTU_171 (unc_Acidobacteria)	110	141	169	163	0	0	0	0	39	53	41	47
OTU_1399 (unc_Gp6)	0	0	0	24	42	58	71	36	90	109	115	117
OTU_741 (Acidibacter_ferrireducens)	166	145	127	103	14	17	14	14	43	20	34	43
OTU_310 (unc_Gp16)	0	0	0	0	137	138	131	149	0	0	0	0
OTU_246 (unc_Gp6)	0	0	0	0	55	91	104	62	85	134	51	48
OTU_495 (unc_Solirubrobacterales)	43	16	50	74	40	56	49	41	108	54	76	54
OTU_993 (unc_Hyphomicrobiaceae)	11	0	25	88	0	0	12	23	139	125	170	101
OTU_222 (unc_Mycobacterium)	0	0	0	0	27	43	52	54	89	116	139	139
OTU_602 (unc_Gemmatimonadaceae)	0	65	156	70	21	26	26	36	73	74	69	69
OTU_248 (unc_Rhizobiales)	42	71	56	83	0	24	42	27	78	79	81	116
OTU_8070 (unc_Actinobacteria)	0	0	0	0	50	94	173	155	32	40	26	24
OTU_140 (unc_Actinobacteria)	0	0	0	0	0	0	0	0	119	192	133	251
OTU_953 (unc_Bacteria)	144	155	85	73	0	0	0	0	60	87	81	55
OTU_124 (unc_Pedomicrobium)	30	0	80	65	0	34	30	0	89	124	123	109
OTU_1002 (unc_Gp6)	0	0	0	0	91	77	89	84	123	36	57	33
OTU_2926 (unc_Gp6)	77	59	91	90	30	45	40	45	47	55	40	38
OTU_410 (unc_Gp16)	110	278	224	80	0	0	0	0	0	12	17	24
OTU_270 (unc_Bacteria)	157	188	200	182	0	0	0	0	0	0	0	0
OTU_1008 (unc_Solirubrobacterales)	0	0	0	0	35	63	57	41	117	122	92	93
OTU_277 (unc_Bacteria)	0	0	19	207	16	13	20	37	35	48	126	119
OTU_444 (unc_Gemmatimonadaceae)	234	148	194	123	0	0	0	0	0	0	0	20
OTU_883 (unc_Sphingomonas)	0	0	0	93	33	83	51	36	79	64	90	82
OTU_384 (unc_Gp6)	0	0	0	0	55	59	51	51	130	97	84	72
OTU_165 (unc_Actinobacteria)	0	0	0	0	34	86	151	131	39	58	35	42
OTU_446 (unc_Gp1)	99	208	314	88	0	0	0	0	0	0	0	0
OTU_360 (unc_Gp6)	0	0	0	57	0	0	0	0	212	102	140	131
OTU_1765 (unc_Solirubrobacterales)	221	213	112	124	0	0	0	0	0	0	23	21
OTU_518 (unc_Gp3)	230	391	64	48	0	0	0	0	0	0	0	16
OTU_391 (unc_Gp6)	0	0	0	0	40	77	65	89	61	98	86	65
OTU_188 (unc_Desertimonas)	0	0	0	0	39	43	43	40	127	118	101	84
OTU_189 (unc_Gp25)	0	0	0	0	0	0	0	0	114	205	116	205
OTU_733 (Paenibacillus_endophyticus)	10	0	13	10	93	133	107	84	19	31	12	15
OTU_339 (unc_Chloroflexi)	122	208	200	162	0	0	0	0	0	0	0	0
OTU_7952 (unc_Sporosarcina)	39	18	159	162	0	0	0	0	85	101	47	32
OTU_1321 (unc_Gp6)	26	33	35	61	15	21	0	14	63	121	127	111
OTU_224 (unc_Microvirga)	64	37	42	124	33	0	0	0	70	78	81	97
OTU_93 (unc_Actinobacteria)	0	0	0	0	0	21	29	51	111	122	103	174
OTU_1155 (unc_Sphaerobacteraceae)	69	121	15	29	19	89	84	48	14	38	63	24
OTU_194 (Actinoallomurus_bryophytorum)	300	133	112	86	0	0	0	0	28	0	27	0
OTU_228 (unc_Jiangellaceae)	0	0	0	0	82	79	92	73	66	47	42	56
OTU_1015 (Luteitalea_pratensis)	0	0	0	0	82	75	147	81	29	52	25	39
OTU_475 (unc_Gp6)	0	0	0	0	46	31	36	55	119	104	91	90
OTU_160 (unc_Geodermatophilus)	103	83	89	214	0	0	0	0	0	53	40	62
OTU_1418 (unc_Gp6)	0	0	0	0	114	110	114	85	40	12	18	0
OTU_920 (unc_Comamonadaceae)	136	107	78	83	20	32	26	0	23	45	40	36
OTU_457 (unc_Gp17)	0	0	0	0	89	95	112	108	41	27	14	17
OTU_1486 (unc_Gp3)	0	0	0	31	24	52	56	58	107	85	85	63
OTU_346 (unc_Gp11)	0	0	0	0	42	27	54	46	110	122	80	77
OTU_3813 (unc_Gp6)	0	0	0	0	34	40	67	43	133	91	83	66
OTU_1088 (unc_Oxalobacteraceae)	122	66	29	156	18	45	41	44	25	0	23	23
OTU_6687 (unc_Actinobacteria)	160	121	133	83	0	0	0	0	25	49	27	46
OTU_202 (unc_Bacteria)	48	117	108	46	23	31	28	19	44	33	59	46
OTU_624 (unc_Gp5)	0	0	0	0	22	26	43	23	91	135	129	93
OTU_2280 (unc_Gp6)	0	0	0	0	58	51	72	57	55	84	84	65
OTU_302 (unc_Gemmatimonas)	69	207	168	154	0	0	0	0	14	0	17	12
OTU_2783 (unc_Gp6)	0	0	0	0	78	95	88	72	64	54	20	22
OTU_268 (unc_Hyphomicrobium)	32	29	46	53	41	49	63	47	67	62	50	0
OTU_197 (unc_Phyllobacterium)	0	0	0	0	64	35	36	46	67	91	87	91
OTU_75 (unc_Gp16)	0	0	0	70	54	72	62	0	0	74	119	72
OTU_137 (unc_Bacteria)	0	0	0	0	0	0	0	0	117	133	107	210
OTU_3587 (unc_Solirubrobacterales)	0	0	0	23	72	59	70	60	56	47	55	51
OTU_539 (unc_Rhodospirillaceae)	0	17	52	38	12	17	30	42	76	97	92	70
OTU_7841 (unc_Gp6)	0	15	11	0	74	64	72	61	130	28	28	0
OTU_305 (unc_Spartobacteria_genera_incertae_sedis)	68	92	90	0	0	0	0	0	52	94	92	96
OTU_217 (unc_Nocardioides)	0	0	0	27	51	104	105	95	22	30	21	19
OTU_823 (Shimazuella_kribbensis)	94	144	102	76	0	11	0	0	64	37	38	26
OTU_1403 (unc_Lysinibacillus)	45	41	36	27	16	14	0	0	87	150	85	55
OTU_492 (unc_Gammaproteobacteria)	0	0	0	0	28	63	64	82	97	72	61	30
OTU_398 (unc_Acidimicrobiales)	56	60	75	37	51	59	60	57	16	13	11	17
OTU_4317 (unc_Gp17)	0	0	0	0	71	128	132	109	0	0	0	0
OTU_366 (unc_Gp1)	0	0	127	247	14	26	0	16	27	20	39	12
OTU_545 (unc_Occallatibacter)	263	217	115	19	0	0	0	0	0	0	0	0
OTU_4223 (unc_Acidobacteria)	163	122	121	122	0	0	0	0	14	0	13	29
OTU_221 (unc_Actinobacteria)	81	106	124	107	0	0	0	0	23	45	39	44
OTU_971 (unc_Acidobacteria)	0	0	0	0	55	64	74	80	103	49	21	16
OTU_2773 (unc_Rhizobiales)	46	78	120	71	0	14	21	24	33	47	46	45
OTU_201 (unc_Micromonosporaceae)	158	143	172	107	0	0	0	0	0	0	0	0
OTU_531 (unc_Gp7)	0	0	0	0	39	48	71	50	90	72	51	58
OTU_4266 (unc_Actinoplanes)	159	218	100	102	0	0	0	0	0	0	0	14
OTU_382 (Gaiella_occulta)	0	0	0	0	25	22	19	14	126	125	76	97
OTU_8121 (unc_Enterobacteriaceae)	0	0	0	0	321	0	25	0	0	0	0	0
OTU_8075 (unc_Gaiella)	0	0	0	0	0	0	0	0	77	156	108	186
OTU_479 (unc_Actinobacteria)	111	135	155	54	0	0	0	0	31	22	33	26
OTU_408 (unc_Stenotrophobacter)	124	375	76	31	0	0	0	0	0	0	0	0
OTU_347 (Thermoactinomyces_vulgaris)	119	309	58	72	0	0	0	0	0	0	17	13
OTU_351 (unc_Betaproteobacteria)	49	53	108	58	16	16	27	26	31	32	39	53
OTU_154 (unc_Gp7)	0	0	0	0	0	29	31	55	95	82	133	60
OTU_345 (unc_Paenibacillus)	97	81	56	69	0	0	0	15	48	49	72	44
OTU_1301 (unc_Bacteria)	21	17	78	31	0	0	0	0	93	84	99	91
OTU_185 (unc_Gp17)	43	0	135	52	0	27	25	28	36	66	27	63
OTU_1054 (unc_Gp6)	45	98	237	158	0	0	0	0	0	0	0	0
OTU_354 (unc_Paenibacillus)	80	64	52	85	12	29	34	26	28	40	28	28
OTU_643 (unc_Gp4)	0	0	0	0	37	36	31	50	68	107	65	70
OTU_649 (unc_Acidobacteria)	0	0	0	0	81	103	101	98	11	8	0	0
OTU_429 (unc_Alphaproteobacteria)	45	66	111	52	18	0	0	13	41	46	56	59
OTU_210 (unc_Streptomycetaceae)	168	264	43	92	0	0	0	0	0	0	0	0
OTU_420 (unc_Paenibacillus)	42	52	41	51	0	0	0	0	103	79	70	71
OTU_216 (unc_Bacteria)	43	102	264	117	0	0	0	0	0	0	0	0
OTU_313 (unc_Gp6)	0	0	0	0	63	30	40	38	26	91	84	67
OTU_156 (unc_Gemmatimonadaceae)	86	53	59	119	0	0	0	0	0	39	77	79
OTU_804 (unc_Gp6)	14	48	134	94	0	0	0	0	62	39	74	39
OTU_4667 (unc_Gp6)	29	0	34	45	27	27	33	29	54	54	55	75
OTU_1016 (unc_Desertimonas)	26	32	31	29	23	29	52	36	55	54	50	49
OTU_251 (unc_Chloroflexi)	12	7	190	287	0	0	0	0	0	0	0	0
OTU_400 (unc_Gp16)	33	59	48	118	0	22	29	28	41	38	49	23
OTU_176 (unc_Bacteria)	0	0	0	0	22	55	52	70	75	54	48	64
OTU_474 (unc_Bacteria)	191	161	77	107	0	0	0	0	0	0	0	0
OTU_8497 (unc_Gaiella)	0	0	0	0	0	0	0	0	103	123	84	173
OTU_212 (unc_Gp1)	156	188	176	19	0	0	0	0	0	0	0	0
OTU_2744 (unc_Bacteria)	20	14	61	40	25	44	54	64	0	15	44	62
OTU_1036 (unc_Gp25)	0	0	0	0	34	70	61	56	95	39	45	24
OTU_592 (unc_Gp16)	16	0	0	11	103	78	79	66	0	16	0	15
OTU_375 (unc_Steroidobacteraceae)	0	0	0	0	0	36	63	50	82	87	75	57
OTU_1123 (unc_Bacteria)	32	39	39	28	21	33	23	25	78	55	45	43
OTU_7096 (unc_Sphingomonadaceae)	37	41	27	73	17	49	33	34	47	35	26	35
OTU_674 (unc_Bacteria)	0	0	46	63	63	90	35	33	21	29	18	12
OTU_3198 (unc_Gp6)	73	37	143	67	0	23	16	12	21	27	27	31
OTU_300 (unc_Geminicoccaceae)	0	0	0	0	34	56	63	47	54	60	44	60
OTU_311 (unc_Nocardioidaceae)	14	0	0	57	35	33	53	22	30	55	78	44
OTU_594 (unc_Anaerolineaceae)	0	0	0	0	74	61	90	57	58	15	10	13
OTU_2782 (unc_Ilumatobacter)	0	0	0	34	65	49	49	55	33	47	31	29
OTU_9522 (unc_Mycobacterium)	69	28	46	83	0	0	0	0	43	49	74	74
OTU_341 (unc_Anaerolineae)	0	0	0	0	66	96	66	82	29	22	11	0
OTU_7522 (unc_Bacteria)	0	0	0	0	29	55	40	30	68	84	51	57
OTU_3539 (unc_Anaerolineae)	106	217	148	37	0	0	0	0	0	0	0	0
OTU_650 (unc_Gp6)	87	47	82	138	0	0	0	0	0	0	74	39
OTU_687 (unc_Hyphomicrobiaceae)	32	54	32	20	18	28	25	21	79	38	61	29
OTU_973 (unc_Actinobacteria)	0	0	0	0	57	47	51	43	50	68	27	47
OTU_435 (unc_Micrococcaceae)	25	17	0	39	44	46	40	67	22	17	54	27
OTU_930 (unc_Betaproteobacteria)	32	29	17	25	31	41	45	49	24	41	35	45
OTU_243 (unc_Bacteria)	93	197	168	40	0	0	0	0	0	0	0	0
OTU_344 (unc_Actinobacteria)	17	0	0	0	0	0	0	0	102	86	88	150
OTU_470 (unc_Solirubrobacterales)	0	0	0	0	28	50	61	57	56	61	38	42
OTU_298 (unc_Bacteria)	161	150	83	88	0	0	0	0	0	0	0	0
OTU_1894 (unc_Micromonosporaceae)	0	0	0	0	41	55	64	71	37	43	32	32
OTU_117 (unc_Bacillus)	37	47	79	86	0	14	14	0	22	52	57	33
OTU_10054 (unc_Bacteria)	47	64	108	25	0	0	19	0	30	53	39	61
OTU_499 (unc_Acidibacter)	0	29	33	63	22	0	0	14	50	50	99	57
OTU_538 (unc_Nitrospira)	0	15	0	30	47	81	75	87	0	0	12	12
OTU_955 (unc_Gp6)	0	0	0	40	0	15	0	0	61	79	113	113
OTU_1390 (unc_Latescibacteria_genera_incertae_sedis)	0	0	0	0	41	51	80	68	47	37	17	24
OTU_6260 (unc_Chloroflexi)	139	195	92	39	0	0	0	0	0	0	0	12
OTU_467 (unc_Micromonosporaceae)	124	91	141	96	0	0	0	0	0	0	0	0
OTU_583 (unc_Gp4)	0	9	31	49	0	8	0	0	46	93	83	100
OTU_2018 (unc_Aminobacter)	16	59	0	23	97	19	32	18	28	25	28	13
OTU_239 (unc_Rhodospirillales)	102	277	76	20	0	0	0	0	0	0	0	0
OTU_445 (unc_Tumebacillus)	0	0	18	8	50	44	65	58	16	60	14	17
OTU_9339 (unc_Sphingomonadaceae)	0	0	0	11	26	67	50	42	66	34	31	33
OTU_1455 (unc_Bacteria)	0	0	0	0	10	39	31	39	103	51	56	47
OTU_191 (unc_Pseudonocardia)	0	0	0	0	0	13	16	15	75	83	84	108
OTU_704 (unc_Stenotrophobacter)	0	0	51	26	31	62	33	32	39	38	21	30
OTU_269 (unc_Bacteria)	0	0	0	0	0	0	0	0	82	89	95	133
OTU_961 (unc_Virgisporangium)	19	15	37	82	18	26	20	20	44	26	46	28
OTU_426 (unc_Sphaerobacteraceae)	9	0	18	56	23	52	56	38	27	21	47	13
OTU_689 (unc_Anaerolineae)	0	0	0	0	99	47	67	55	9	20	10	5
OTU_199 (unc_Iamiaceae)	0	0	0	0	0	0	0	0	96	110	89	99
OTU_957 (unc_Alphaproteobacteria)	146	134	57	48	0	0	0	0	0	0	17	35
OTU_847 (unc_Iamiaceae)	48	63	51	29	16	34	29	28	23	27	23	17
OTU_1308 (unc_Gp4)	0	0	0	0	26	64	48	63	39	42	28	37
OTU_768 (unc_Gemmatimonadaceae)	0	0	0	0	21	34	36	27	85	45	75	39
OTU_459 (unc_Gp6)	0	0	0	0	0	0	0	0	94	124	95	79
OTU_289 (unc_Sphaerobacteraceae)	27	26	53	153	0	0	0	0	0	27	57	58
OTU_912 (unc_Actinobacteria)	0	0	0	0	94	85	71	53	0	0	0	0
OTU_209 (unc_Actinobacteria)	0	0	0	0	55	123	69	67	0	0	0	0
OTU_7313 (unc_Geodermatophilus)	121	170	76	70	0	0	0	0	0	0	0	0
OTU_1832 (unc_Gemmatimonadaceae)	0	0	0	11	16	34	15	26	61	46	97	58
OTU_798 (unc_Bacteria)	0	17	22	0	19	32	37	36	71	49	43	36
OTU_2314 (unc_Geodermatophilaceae)	116	108	65	122	0	8	0	0	0	0	0	0
OTU_9513 (unc_Pilimelia)	101	82	65	37	0	0	0	14	47	31	17	16
OTU_515 (unc_Acidobacteria)	0	0	0	0	75	45	61	80	26	14	5	0
OTU_484 (unc_Gp6)	128	214	60	37	0	0	0	0	0	0	0	0
OTU_1408 (unc_Gp6)	0	0	0	0	30	46	63	38	60	54	30	18
OTU_407 (unc_Gaiella)	75	88	89	49	0	0	0	0	30	24	23	30
OTU_1431 (unc_Cohnella)	34	31	40	47	18	22	20	18	38	31	27	44
OTU_551 (Tumebacillus_ginsengisoli)	73	167	74	35	0	7	7	0	12	0	0	46
OTU_747 (unc_Bacteria)	29	40	51	45	22	35	34	23	31	22	18	13
OTU_483 (unc_Gp17)	0	0	0	0	25	27	14	64	83	56	51	23
OTU_645 (unc_Bacteria)	0	0	19	40	20	34	31	29	53	29	57	37
OTU_1701 (unc_Bacillaceae1)	44	17	30	18	29	42	36	19	15	0	77	25
OTU_9732 (unc_Pseudonocardia)	47	38	66	105	0	0	0	0	16	35	46	37
OTU_6498 (unc_Gp6)	0	0	0	0	93	82	60	55	0	0	0	0
OTU_282 (unc_Actinobacteria)	141	178	84	24	0	0	0	0	0	0	0	0
OTU_1731 (unc_Gaiella)	117	122	102	46	0	0	0	0	0	14	0	12
OTU_8885 (unc_Dactylosporangium)	111	66	64	76	0	0	0	15	0	19	25	20
OTU_196 (unc_Bacteria)	32	0	22	22	22	0	0	0	82	65	44	73
OTU_631 (unc_Brevibacillus)	36	281	27	32	0	0	0	0	36	9	0	12
OTU_514 (unc_Chloroflexi)	78	117	81	104	0	0	0	0	0	0	12	12
OTU_549 (unc_Actinobacteria)	13	0	14	16	45	96	51	48	0	16	14	0
OTU_1281 (unc_Gp17)	0	0	0	0	36	58	70	76	17	22	8	22
OTU_144 (unc_Spartobacteria_genera_incertae_sedis)	0	0	0	0	0	0	0	0	59	67	97	141
OTU_250 (unc_Actinobacteria)	0	0	0	0	49	55	102	86	0	0	0	0
OTU_1124 (unc_Betaproteobacteria)	20	23	25	25	11	23	49	28	35	33	30	43
OTU_82 (unc_Ilumatobacteraceae)	0	0	0	0	33	46	56	0	28	62	38	64
OTU_1461 (unc_Gemmatimonadaceae)	0	0	0	0	20	28	32	32	46	45	70	59
OTU_596 (unc_Hydrogenispora)	40	16	26	19	17	14	21	20	39	59	45	29
OTU_566 (unc_Arboricoccus)	0	0	0	0	29	60	67	31	23	41	31	30
OTU_836 (unc_Parviterribacter)	73	65	50	65	12	16	13	10	10	14	19	15
OTU_3420 (unc_Bacillus)	33	18	35	30	18	23	19	0	30	51	35	52
OTU_706 (unc_Gp6)	12	0	35	40	16	12	15	10	43	61	51	44
OTU_3657 (unc_Bacteria)	49	40	15	0	20	21	27	40	13	35	28	50
OTU_9036 (unc_Betaproteobacteria)	58	73	83	55	0	0	0	0	11	26	37	31
OTU_753 (unc_Phenylobacterium)	41	67	38	68	16	19	16	0	12	32	21	25
OTU_1021 (unc_Tumebacillus)	97	53	147	60	0	0	0	0	0	9	7	0
OTU_703 (unc_Gp6)	0	0	0	0	19	26	29	18	40	68	59	67
OTU_2408 (Vicinamibacter_silvestris)	0	0	0	0	58	69	60	37	20	18	9	15
OTU_516 (unc_Vicinamibacter)	0	0	0	0	44	37	33	32	41	47	27	43
OTU_412 (unc_Anaerolineaceae)	0	0	0	0	33	74	107	71	0	0	0	0
OTU_153 (unc_Bacteria)	0	0	0	0	20	33	37	57	62	51	24	27
OTU_695 (unc_Gp5)	9	6	23	23	20	22	25	15	41	32	55	51
OTU_8933 (unc_Gp6)	0	0	0	0	56	79	51	67	9	6	5	0
OTU_7123 (unc_Gp16)	96	0	53	0	0	0	0	0	0	68	57	77
OTU_2901 (unc_Gp6)	0	0	0	0	31	59	53	38	74	22	7	10
OTU_877 (unc_Gp7)	159	37	59	0	0	17	25	18	11	7	8	11
OTU_9873 (unc_Gp6)	0	0	0	0	0	0	20	20	35	71	95	90
OTU_465 (unc_Gp6)	0	0	0	0	23	19	20	40	83	53	39	30
OTU_939 (unc_Thermoleophilia)	114	120	45	62	0	12	0	0	0	9	8	0
OTU_1245 (unc_Thermoleophilia)	0	0	18	29	26	41	40	25	32	47	22	22
OTU_2185 (unc_Pseudonocardiaceae)	66	115	62	56	0	0	0	0	0	18	17	30
OTU_1583 (unc_Gp6)	0	0	0	4	44	43	59	40	22	30	28	13
OTU_1207 (unc_Cohnella)	96	49	48	37	15	18	9	7	19	11	15	11
OTU_336 (unc_Gp6)	0	0	0	0	0	8	0	10	121	70	72	42
OTU_572 (unc_Gemmatimonadaceae)	154	48	56	61	0	0	0	0	0	0	14	21
OTU_284 (unc_Streptosporangiales)	121	223	36	6	0	0	0	0	0	0	0	0
OTU_8976 (unc_Anaerolineaceae)	0	0	16	23	19	27	15	25	10	44	67	59
OTU_1017 (unc_Bacteria)	0	0	0	0	25	43	36	28	68	53	25	15
OTU_262 (unc_Micromonosporaceae)	110	112	94	45	0	0	0	0	0	0	0	0
OTU_652 (unc_Rhodospirillales)	77	110	76	68	0	0	0	0	0	7	0	18
OTU_1584 (unc_Actinobacteria)	0	0	0	0	47	64	61	52	10	16	10	6
OTU_1258 (unc_Gp6)	0	0	0	0	16	34	38	27	52	59	39	31
OTU_9812 (unc_Bacteria)	0	0	0	0	25	58	68	40	16	27	23	23
OTU_827 (unc_Gp6)	0	0	0	0	55	61	64	41	22	6	0	11
OTU_418 (unc_Iamiaceae)	41	53	52	15	0	0	0	0	53	40	41	39
OTU_1215 (unc_Gp16)	0	0	0	0	63	29	47	28	24	31	21	23
OTU_1835 (unc_Gp6)	0	0	0	0	30	51	57	49	48	32	0	7
OTU_374 (unc_Terrimicrobium)	0	0	0	0	0	0	33	30	47	82	40	74
OTU_1923 (unc_Gp16)	0	0	0	0	22	52	51	47	22	16	49	18
OTU_1573 (unc_Anaerolineae)	0	0	0	0	21	17	32	22	39	47	78	35
OTU_304 (unc_Micrococcales)	0	0	0	39	73	31	46	33	0	0	32	0
OTU_306 (unc_Solibacillus)	0	0	20	15	0	0	0	0	90	64	95	28
OTU_1102 (unc_Bacteria)	0	0	0	0	58	71	51	32	16	18	0	6
OTU_4388 (unc_WPS-1_genera_incertae_sedis)	30	33	10	43	24	16	0	16	24	35	42	27
OTU_1499 (unc_Gp6)	0	0	0	0	36	68	74	39	33	9	0	0
OTU_585 (unc_Kofleria)	41	68	81	78	0	0	0	0	0	22	21	19
OTU_721 (unc_Chloroflexi)	0	17	24	72	9	18	31	37	23	8	37	16
OTU_327 (unc_Spartobacteria_genera_incertae_sedis)	0	0	0	0	0	0	0	0	49	92	69	100
OTU_6107 (unc_Gammaproteobacteria)	0	0	0	0	24	48	38	28	83	22	20	10
OTU_331 (unc_Acidimicrobiales)	52	106	91	62	0	0	0	0	0	0	0	25
OTU_238 (unc_Actinobacteria)	0	0	0	0	0	0	26	22	59	69	58	64
OTU_769 (unc_Gp5)	9	22	65	22	0	9	10	0	28	50	34	60
OTU_560 (unc_Actinobacteria)	108	145	48	9	0	0	0	0	0	36	0	0
OTU_794 (unc_Flavisolibacter)	17	8	0	279	0	0	0	0	0	0	0	0
OTU_138 (unc_Marmoricola)	18	15	0	31	19	26	17	23	25	42	31	36
OTU_1294 (unc_Gp10)	0	0	0	0	38	61	45	44	14	11	26	12
OTU_502 (unc_Gemmatimonadaceae)	172	88	16	50	0	0	0	0	0	0	0	7
OTU_2813 (unc_Betaproteobacteria)	6	0	0	0	56	58	51	50	7	12	0	0
OTU_8906 (unc_Gp6)	0	0	0	0	36	15	54	46	25	33	37	12
OTU_543 (unc_Chitinophagaceae)	33	38	33	39	0	0	0	0	47	38	39	42
OTU_4107 (unc_Gp6)	0	0	0	0	0	0	0	0	66	80	79	71
OTU_647 (unc_Gemmatimonadaceae)	0	0	0	0	31	29	29	50	49	31	24	15
OTU_536 (unc_Actinomarinicola)	31	43	71	44	17	17	11	7	12	9	16	14
OTU_552 (unc_Thermoflavimicrobium)	0	0	0	0	0	0	0	0	265	11	0	9
OTU_438 (unc_Alkalihalobacillus)	139	46	33	52	0	0	0	0	12	8	9	16
OTU_1649 (unc_Gp6)	0	0	0	13	24	19	28	27	55	35	33	30
OTU_1250 (unc_Paenibacillaceae1)	104	29	56	60	6	6	0	0	17	6	14	5
OTU_917 (unc_Thermoleophilia)	0	0	0	0	55	61	39	37	17	17	9	0
OTU_204 (unc_Actinobacteria)	0	0	0	0	15	32	0	14	26	78	55	53
OTU_783 (unc_Gaiella)	86	122	49	26	9	0	6	10	0	0	0	7
OTU_283 (unc_Acidimicrobiales)	0	0	0	0	34	36	37	33	26	35	23	27
OTU_547 (unc_Bacteria)	51	128	47	39	0	0	0	0	0	10	20	25
OTU_1096 (unc_Solirubrobacterales)	7	0	6	8	33	47	43	37	20	18	12	16
OTU_1052 (unc_Gp6)	56	43	38	38	0	0	0	0	0	20	50	56
OTU_887 (unc_Gp6)	0	0	18	103	0	0	0	0	0	18	69	77
OTU_1507 (unc_Gemmatimonadaceae)	0	0	22	77	8	11	7	10	23	30	43	44
OTU_490 (unc_Thermoleophilia)	24	22	19	0	0	0	0	0	59	59	47	61
OTU_99 (unc_Gaiella)	0	0	0	0	0	37	34	25	50	57	31	33
OTU_8109 (unc_Gp16)	0	0	0	13	40	29	49	43	12	26	17	11
OTU_178 (Reyranella_soli)	0	0	0	0	26	21	25	18	51	41	25	48
OTU_130 (unc_Actinobacteria)	16	19	29	18	0	19	16	0	42	39	40	43
OTU_698 (unc_Gp6)	44	214	67	6	0	0	0	0	0	0	0	0
OTU_839 (unc_Bacteria)	0	0	0	0	33	76	32	79	0	7	0	0
OTU_2656 (unc_Spartobacteria_genera_incertae_sedis)	10	19	160	44	0	0	0	0	0	20	15	20
OTU_451 (unc_Actinobacteria)	0	0	0	0	43	55	70	48	8	0	0	0
OTU_471 (unc_Lysobacter)	15	17	33	59	0	20	25	0	19	28	29	31
OTU_614 (unc_Alkalihalobacillus)	106	20	14	57	8	0	9	5	6	13	21	24
OTU_1033 (unc_Roseisolibacter)	0	0	0	0	20	40	50	36	52	16	27	0
OTU_886 (unc_Roseomonas)	13	18	16	31	33	40	43	33	0	6	9	0
OTU_220 (unc_Microlunatus)	38	0	17	18	0	0	25	22	34	51	25	41
OTU_6861 (unc_Gp16)	115	16	0	21	21	32	15	0	0	21	0	29
OTU_776 (unc_Gp16)	0	0	0	0	32	46	76	49	12	0	0	12
OTU_1831 (unc_Microvirga)	0	0	0	27	28	32	30	19	24	33	32	19
OTU_842 (unc_Altererythrobacter)	13	15	12	108	11	14	16	19	0	25	13	17
OTU_1778 (unc_Gp5)	60	22	60	32	5	6	9	6	21	20	21	16
OTU_909 (unc_Gp6)	47	103	66	19	6	6	6	6	17	6	5	6
OTU_493 (unc_Gp4)	15	0	0	0	12	27	15	13	64	55	16	40
OTU_500 (unc_Bacteria)	39	103	118	40	0	0	0	0	0	0	0	0
OTU_190 (unc_Actinobacteria)	0	0	0	27	0	40	73	71	0	29	0	0
OTU_240 (unc_Chloroflexi)	0	0	0	0	0	0	0	0	98	45	45	81
OTU_1058 (uncultured_bacterium)	90	63	70	52	0	0	0	0	0	0	7	12
OTU_2039 (unc_Gp6)	0	0	0	0	18	17	32	21	58	48	34	20
OTU_871 (unc_Flavitalea)	18	24	19	45	0	13	0	0	45	31	47	32
OTU_6590 (unc_Gaiella)	61	131	86	27	0	0	0	0	0	0	0	0
OTU_4216 (unc_Gp6)	0	0	0	0	16	22	22	28	66	30	37	25
OTU_1037 (unc_Gp6)	65	71	16	60	0	0	0	0	0	11	25	41
OTU_7607 (unc_Gp6)	9	0	0	0	13	29	26	22	43	40	37	28
OTU_9428 (unc_Gp16)	7	0	0	0	44	39	95	32	0	0	0	0
OTU_925 (unc_Micromonosporaceae)	0	0	27	23	0	15	0	15	25	56	56	45
OTU_292 (unc_Actinobacteria)	10	0	0	0	17	22	19	17	31	41	39	52
OTU_5323 (unc_Hyphomicrobiaceae)	59	57	76	48	0	0	0	0	0	5	13	26
OTU_402 (unc_Gaiella)	18	13	15	24	0	0	0	0	51	46	45	56
OTU_859 (unc_Chitinophagaceae)	42	137	38	20	0	0	0	0	10	11	13	26
OTU_373 (unc_Bacteria)	37	28	90	104	0	0	0	0	0	0	0	15
OTU_720 (unc_Chloroflexi)	11	15	9	26	59	10	7	18	15	0	46	10
OTU_940 (unc_Paenibacillus)	29	28	38	21	0	10	11	0	30	36	32	33
OTU_520 (unc_Sphaerobacteraceae)	0	0	0	0	0	0	0	0	77	58	57	68
OTU_791 (unc_Bacteria)	0	0	0	0	23	60	50	37	14	20	7	12
OTU_969 (unc_Paenibacillus)	63	27	95	42	5	5	0	9	6	11	0	6
OTU_937 (unc_Modestobacter)	25	34	19	64	16	32	25	20	0	0	0	11
OTU_320 (unc_Bacteria)	6	0	13	23	21	25	30	38	15	25	20	15
OTU_1129 (unc_Rhizobiales)	16	35	27	14	15	17	25	20	22	0	24	32
OTU_630 (unc_Actinobacteria)	0	0	7	5	47	58	43	42	0	4	0	0
OTU_428 (unc_Gemmatimonadaceae)	68	76	41	52	0	0	0	0	0	17	11	15
OTU_443 (unc_Marmoricola)	0	0	0	7	36	38	44	29	13	16	8	26
OTU_861 (unc_Gp6)	0	0	0	0	13	28	21	24	19	54	40	35
OTU_419 (unc_Nitrosospira)	22	29	0	33	17	0	25	21	0	18	36	43
OTU_668 (unc_Gp3)	41	110	52	37	0	0	0	0	0	10	14	16
OTU_1061 (unc_Solirubrobacterales)	53	26	10	8	22	51	30	15	0	11	8	0
OTU_1168 (unc_Gp17)	0	0	0	0	28	34	41	46	4	27	15	20
OTU_727 (unc_Rhizobiales)	7	15	7	13	11	33	27	32	28	14	22	23
OTU_338 (unc_Actinobacteria)	70	72	82	34	0	0	0	0	0	0	0	16
OTU_168 (unc_Actinobacteria)	57	103	58	30	0	0	0	0	0	0	0	30
OTU_526 (unc_Gp6)	14	9	10	41	0	0	0	0	0	22	75	82
OTU_1064 (unc_Sphaerobacteraceae)	39	37	16	26	8	19	29	28	6	11	19	5
OTU_182 (Gaiella_occulta)	0	0	33	0	0	0	0	0	51	81	43	41
OTU_296 (unc_Clostridiumsensustricto)	21	68	16	15	0	0	0	0	26	47	38	33
OTU_6277 (unc_Gaiella)	0	0	0	0	38	63	53	36	0	6	4	0
OTU_504 (unc_Beijerinckia)	39	38	23	119	8	11	7	0	6	0	0	0
OTU_1091 (unc_Thermoleophilia)	14	15	20	0	0	0	0	0	52	42	41	67
OTU_663 (unc_Gemmatimonadaceae)	70	102	70	34	0	0	0	0	0	0	0	0
OTU_510 (uncultured_soil)	43	56	79	67	0	0	0	0	0	5	8	6
OTU_390 (unc_Bacteria)	113	80	53	28	0	0	0	0	0	0	0	0
OTU_686 (unc_Gaiella)	0	0	0	0	18	31	46	21	43	38	21	0
OTU_4059 (unc_Gemmatimonadaceae)	57	115	24	15	0	0	0	0	12	16	16	18
OTU_658 (unc_Actinobacteria)	10	9	12	17	36	27	26	15	27	16	9	10
OTU_7913 (unc_Actinobacteria)	0	0	0	0	47	39	61	45	0	0	0	0
OTU_773 (unc_Gp4)	0	0	0	0	27	19	36	42	12	32	13	30
OTU_840 (unc_Sorangium)	22	57	34	47	0	7	20	18	14	8	16	6
OTU_1252 (unc_Betaproteobacteria)	20	23	78	33	5	5	5	0	8	16	24	30
OTU_363 (unc_Bacteria)	0	0	46	35	0	16	8	21	23	26	28	31
OTU_729 (unc_Bacteria)	29	54	30	36	13	17	8	16	6	12	8	11
OTU_802 (unc_WPS-1_genera_incertae_sedis)	46	22	15	37	13	13	6	11	18	19	24	12
OTU_361 (unc_Rhizobiales)	0	0	0	0	30	45	38	28	13	18	16	16
OTU_1660 (unc_Rhizobiales)	3	8	8	0	23	42	39	34	32	10	3	6
OTU_669 (unc_Cystobacter)	21	28	11	94	0	16	0	9	0	4	35	24
OTU_2228 (unc_Gp7)	0	0	0	0	10	9	22	15	81	37	22	28
OTU_4487 (unc_Litorilinea)	0	0	0	0	28	28	31	52	21	10	18	14
OTU_1051 (unc_Rhizobiales)	0	0	0	0	22	25	35	28	19	36	18	28
OTU_559 (unc_Gemmatimonadetes)	0	0	11	18	20	23	17	14	46	17	34	16
OTU_2552 (unc_Thermoleophilia)	54	83	78	28	0	0	0	0	0	6	0	13
OTU_1083 (unc_Sphaerobacteraceae)	26	27	46	57	4	10	15	10	11	7	17	8
OTU_6434 (unc_Gemmatimonadetes)	25	15	63	18	0	17	0	11	35	15	15	24
OTU_450 (Paenibacillus_sepulcri)	52	47	21	24	0	0	0	0	39	23	34	11
OTU_205 (unc_Propionibacteriales)	0	0	0	0	0	0	0	0	43	65	70	58
OTU_569 (unc_Geminicoccaceae)	7	0	0	0	20	21	30	38	29	23	22	19
OTU_724 (unc_Nitrospira)	47	55	41	52	5	7	11	9	6	4	0	8
OTU_367 (unc_Gp16)	0	0	0	0	15	37	18	27	49	19	28	17
OTU_6073 (unc_Conexibacter)	27	23	14	24	35	30	8	16	0	14	9	13
OTU_966 (unc_Gp6)	0	7	32	6	0	0	0	0	21	51	59	61
OTU_5588 (unc_Solirubrobacterales)	0	0	0	0	15	21	14	14	34	34	34	51
OTU_858 (Lysobacter_dokdonensis)	0	0	0	9	15	18	22	7	10	86	26	27
OTU_1661 (unc_Gaiella)	0	0	0	0	26	23	32	12	51	25	23	15
OTU_482 (unc_Gp6)	59	81	89	28	0	0	0	0	0	0	0	0
OTU_563 (unc_Spartobacteria_genera_incertae_sedis)	21	80	95	49	0	0	0	0	0	0	0	8
OTU_427 (unc_Gemmatimonadaceae)	0	0	42	69	0	0	0	0	11	24	38	48
OTU_710 (unc_Bacteria)	39	0	38	109	0	0	0	0	0	5	19	25
OTU_266 (unc_Gp6)	0	0	0	0	0	0	0	0	0	68	50	114
OTU_1229 (unc_Gp10)	0	0	0	0	29	31	51	37	10	16	11	7
OTU_1283 (unc_Bacteria)	44	88	53	43	0	0	0	0	0	7	6	11
OTU_633 (unc_Rhizomicrobium)	77	105	65	10	0	0	0	0	0	0	0	0
OTU_834 (unc_Bacteria)	0	0	0	0	0	0	0	0	43	59	61	63
OTU_1026 (unc_Actinobacteria)	0	0	0	0	42	48	56	31	3	0	0	0
OTU_2857 (unc_Gaiella)	46	61	77	37	0	0	0	0	9	15	0	0
OTU_1483 (unc_Gp6)	0	0	0	0	0	0	0	11	22	77	60	54
OTU_1136 (unc_Chloroflexi)	0	0	5	23	27	17	36	28	16	19	21	4
OTU_1577 (unc_Rhizobiales)	0	0	0	0	14	33	34	33	38	23	11	13
OTU_404 (unc_Thermoleophilia)	37	62	57	16	0	0	0	0	13	28	15	15
OTU_326 (unc_Rhizobium)	0	0	0	33	0	25	33	21	23	37	19	20
OTU_814 (unc_Gemmatimonadaceae)	0	0	48	125	0	0	0	0	0	7	24	21
OTU_1137 (unc_Bacteria)	25	73	49	15	0	0	0	0	14	29	11	27
OTU_393 (unc_Gp6)	0	0	0	0	0	0	0	0	27	61	57	79
OTU_949 (unc_Rhodospirillales)	0	0	5	9	23	13	19	29	32	30	21	18
OTU_1078 (unc_Anaerolineaceae)	0	0	0	0	37	25	60	56	0	0	0	0
OTU_448 (unc_Bacteria)	11	0	14	16	0	0	0	0	22	65	48	48
OTU_297 (unc_Jatrophihabitans)	63	91	47	33	0	0	0	0	0	0	0	13
OTU_4911 (unc_Bacteria)	0	0	16	0	0	19	20	19	31	40	29	37
OTU_1591 (unc_Gp5)	0	4	5	9	8	16	27	29	40	20	26	19
OTU_587 (unc_Bacteria)	0	0	0	0	0	0	0	0	53	63	46	57
OTU_2083 (unc_Bacteria)	56	37	23	27	22	13	7	20	0	8	0	0
OTU_714 (unc_Actinobacteria)	30	108	67	41	0	0	0	0	0	0	0	0
OTU_903 (unc_Bacteria)	28	96	77	42	0	0	0	0	0	0	0	0
OTU_2760 (unc_Thermoleophilia)	37	34	50	47	0	0	0	0	14	20	12	16
OTU_1463 (unc_Myxococcales)	53	40	39	42	0	0	0	0	8	11	25	14
OTU_994 (unc_Gp6)	46	95	92	11	0	0	0	0	0	0	0	0
OTU_6224 (unc_Bacteria)	0	0	31	38	9	25	24	24	9	7	19	14
OTU_3670 (unc_Ramlibacter)	34	33	19	58	11	0	8	0	9	14	11	23
OTU_3834 (unc_Gp3)	47	65	26	70	0	0	0	0	0	0	10	17
OTU_1184 (unc_Gemmatimonadaceae)	13	11	55	68	0	7	6	5	10	0	15	27
OTU_6723 (unc_Gp6)	0	0	0	0	39	63	39	27	0	0	3	0
OTU_1445 (unc_Actinobacteria)	0	0	0	0	26	29	38	30	9	18	13	20
OTU_907 (unc_Gp6)	20	14	10	68	0	0	0	0	0	25	48	34
OTU_1436 (unc_Actinobacteria)	12	0	38	22	0	0	0	0	26	44	27	47
OTU_535 (unc_Gp6)	0	0	0	0	40	36	40	33	10	6	0	7
OTU_2557 (unc_Actinoallomurus)	37	178	25	14	0	0	0	0	0	0	0	0
OTU_1128 (unc_Rhodospirillales)	0	0	0	7	34	30	22	20	21	15	22	10
OTU_642 (unc_Bacteria)	0	0	0	0	0	0	0	0	45	53	58	56
OTU_2169 (unc_Gp6)	0	0	43	49	0	0	0	7	0	33	42	38
OTU_982 (unc_Solirubrobacterales)	53	85	32	48	0	0	6	0	0	10	0	0
OTU_1586 (unc_Bacteria)	0	0	8	0	5	27	23	36	28	15	28	22
OTU_805 (unc_Parageobacillus)	0	10	0	9	0	0	0	0	113	27	17	34
OTU_785 (unc_Litorilinea)	0	0	0	10	6	27	32	51	11	9	18	23
OTU_498 (unc_WPS-1_genera_incertae_sedis)	57	105	49	28	0	0	0	0	0	0	0	0
OTU_818 (unc_Bacillaceae1)	0	0	9	0	0	0	0	0	44	42	62	53
OTU_810 (unc_Gp17)	0	0	0	0	19	29	16	17	18	25	35	29
OTU_2202 (Steroidobacter_agariperforans)	8	4	6	25	10	15	16	9	23	31	18	34
OTU_1361 (unc_Domibacillus)	9	6	17	10	16	22	6	8	28	11	41	21
OTU_635 (unc_Roseiflexaceae)	0	0	0	0	21	51	57	42	0	0	0	0
OTU_9118 (unc_Micromonosporaceae)	31	11	0	0	0	0	0	0	22	56	30	63
OTU_1343 (unc_Bacteria)	0	0	7	16	6	9	19	14	48	36	12	29
OTU_894 (unc_Glycomyces)	6	0	0	7	14	11	14	7	37	33	51	13
OTU_2035 (Ohtaekwangia_koreensis)	5	0	0	5	15	8	0	8	51	39	46	16
OTU_1424 (unc_Gp17)	9	29	40	24	8	11	22	6	13	18	13	9
OTU_875 (unc_Gp6)	0	0	0	0	39	27	36	22	10	18	10	6
OTU_464 (unc_Actinobacteria)	0	0	0	0	0	0	0	0	38	66	53	47
OTU_852 (unc_Bradyrhizobiaceae)	10	12	0	28	0	11	0	8	53	26	35	19
OTU_1100 (unc_Bacteria)	0	0	0	0	27	51	34	34	8	0	0	13
OTU_4004 (unc_Gp7)	0	0	0	0	7	35	42	66	3	6	5	9
OTU_709 (unc_Bacteria)	0	0	0	0	38	53	33	17	0	14	0	9
OTU_1760 (unc_Gemmatimonadaceae)	0	0	7	15	7	8	14	24	18	39	22	36
OTU_612 (Arenimicrobium_luteum)	0	0	0	22	0	13	0	11	34	49	27	41
OTU_869 (unc_Gp3)	74	102	36	18	0	0	0	0	0	0	0	0
OTU_831 (unc_Gemmatimonadaceae)	4	3	56	140	0	0	0	0	0	0	0	0
OTU_9003 (unc_Gp6)	0	0	0	0	0	0	0	0	14	73	42	73
OTU_291 (unc_Gp10)	0	0	0	0	20	22	30	16	24	29	25	11
OTU_627 (unc_Bacteria)	16	15	76	99	0	0	0	0	0	0	0	0
OTU_2485 (unc_Isosphaeraceae)	10	6	0	22	18	19	22	10	16	18	21	21
OTU_1456 (unc_Lautropia)	0	0	0	6	11	14	22	19	29	17	39	26
OTU_625 (unc_Gp25)	0	0	0	0	0	0	0	0	53	63	46	37
OTU_5065 (unc_Rhodospirillales)	40	61	78	26	0	0	0	6	0	0	5	0
OTU_4796 (unc_Solirubrobacterales)	98	77	18	24	0	0	0	0	0	0	0	7
OTU_664 (unc_Chromatiales)	0	0	0	0	15	13	27	19	42	25	20	18
OTU_1073 (unc_Gp3)	0	0	35	86	0	0	0	6	13	13	25	19
OTU_1528 (unc_Brevibacillus)	67	87	31	10	0	0	0	0	19	0	8	0
OTU_6804 (unc_Mycobacterium)	0	0	0	0	0	0	0	0	27	50	50	70
OTU_424 (unc_Myxococcales)	17	31	9	27	0	0	0	0	22	35	38	25
OTU_1069 (unc_Nannocystis)	26	8	0	20	16	11	22	9	19	22	14	17
OTU_742 (unc_Spartobacteria_genera_incertae_sedis)	0	0	0	0	0	0	0	0	37	51	43	64
OTU_621 (unc_Bacteria)	31	53	70	13	4	5	4	0	4	6	10	7
OTU_676 (unc_Gp6)	42	35	24	49	0	6	0	0	24	0	7	17
OTU_671 (unc_Agromyces)	0	0	0	20	26	17	31	18	12	15	21	8
OTU_1814 (unc_Comamonadaceae)	22	0	0	20	9	20	15	23	21	25	9	16
OTU_7078 (unc_Gp1)	12	29	154	10	0	0	0	0	0	0	0	0
OTU_3755 (unc_Bacillus)	10	12	18	34	6	0	0	0	20	37	34	23
OTU_192 (Nitrospira_japonica)	0	0	0	0	0	28	32	43	0	36	0	37
OTU_610 (unc_Bacteria)	17	20	116	49	0	0	0	0	0	0	0	0
OTU_7108 (unc_Solirubrobacterales)	7	8	0	6	38	43	23	27	0	0	0	5
OTU_3325 (unc_Gp6)	0	0	0	0	11	42	35	29	8	18	7	18
OTU_632 (unc_Solirubrobacterales)	60	64	30	22	0	0	0	0	0	10	12	14
OTU_6251 (unc_Tumebacillus)	32	69	12	26	0	0	0	0	10	12	7	41
OTU_1160 (unc_Gp6)	0	0	0	0	20	17	19	14	41	26	22	11
OTU_1090 (unc_Gaiella)	52	93	58	13	0	0	0	0	0	0	0	0
OTU_143 (unc_Burkholderiales)	0	0	0	0	31	39	41	22	22	0	0	0
OTU_3042 (Acidibacter_ferrireducens)	0	6	14	84	0	0	0	0	27	22	13	25
OTU_770 (unc_Rhodobacteraceae)	0	0	0	0	38	49	30	32	0	0	0	0
OTU_1382 (unc_Alphaproteobacteria)	0	0	0	4	13	15	23	14	27	28	32	17
OTU_1063 (unc_Gp6)	22	22	9	20	0	0	0	0	23	34	27	39
OTU_772 (unc_Thermoleophilia)	37	43	46	50	0	0	0	0	0	0	12	14
OTU_2577 (Gaiella_occulta)	23	20	12	0	0	16	17	25	20	33	0	19
OTU_2661 (Acidibacter_ferrireducens)	0	0	10	8	0	0	0	0	38	48	49	35
OTU_462 (unc_Actinocorallia)	9	15	38	37	0	0	0	0	28	40	13	13
OTU_9141 (unc_Gp6)	0	0	0	0	16	48	40	34	19	0	0	0
OTU_1337 (unc_Solirubrobacterales)	27	27	17	9	10	20	14	0	13	19	15	14
OTU_9031 (unc_Solirubrobacterales)	26	51	28	19	0	15	12	13	10	8	11	0
OTU_439 (uncultured_Acidobacteria)	0	0	0	14	0	0	0	0	49	51	32	40
OTU_1025 (unc_Gp6)	11	23	6	0	0	4	9	14	33	43	35	9
OTU_828 (unc_Gemmatimonadaceae)	12	9	92	78	0	0	0	0	0	0	0	0
OTU_2105 (unc_Gp6)	0	0	0	0	6	45	16	14	32	23	17	15
OTU_146 (unc_Acidimicrobiales)	0	32	0	0	0	0	20	19	22	28	34	29
OTU_1631 (Adhaeribacter_terrae)	0	0	0	41	10	0	0	0	22	43	33	29
OTU_1221 (unc_Gemmatimonadetes)	0	0	0	0	17	16	20	21	21	14	33	21
OTU_1447 (unc_Betaproteobacteria)	60	54	36	24	5	3	7	3	0	4	0	0
OTU_2870 (unc_Azospirillaceae)	72	82	38	15	0	0	0	0	0	0	0	0
OTU_2635 (unc_Actinobacteria)	50	81	43	30	0	0	0	0	0	0	0	0
OTU_1511 (unc_Amaricoccus)	9	0	0	0	101	0	0	0	0	4	7	5
OTU_816 (unc_Bacteria)	0	0	0	0	33	38	31	41	0	0	0	0
OTU_576 (unc_Gp4)	17	0	0	14	0	0	14	15	25	53	20	20
OTU_611 (unc_Gp18)	0	0	0	0	10	14	8	5	38	31	32	32
OTU_9621 (unc_Actinobacteria)	0	0	0	0	0	0	0	0	16	76	35	55
OTU_756 (unc_Gp17)	0	0	0	0	0	0	0	0	0	35	58	88
OTU_622 (unc_Marmoricola)	0	0	0	17	24	40	17	12	7	15	7	16
OTU_995 (unc_WPS-1_genera_incertae_sedis)	39	97	19	35	0	0	0	0	0	0	9	5
OTU_5084 (unc_Solirubrobacterales)	46	31	23	40	9	13	8	0	0	5	0	7
OTU_1205 (unc_Betaproteobacteria)	0	0	0	0	18	22	20	24	37	15	11	9
OTU_2548 (unc_Sphaerobacteraceae)	6	11	0	29	13	15	18	17	26	10	12	7
OTU_2100 (unc_Kineosporiaceae)	50	45	15	30	0	10	19	8	0	0	9	0
OTU_227 (unc_Ilumatobacteraceae)	0	0	0	0	31	38	42	30	0	0	0	0
OTU_1233 (unc_Acidimicrobiales)	23	30	50	27	6	0	0	0	11	12	15	9
OTU_1157 (unc_Iamiaceae)	5	0	9	7	15	34	26	24	8	8	8	10
OTU_6197 (unc_Stenotrophobacter)	0	0	0	7	9	10	5	10	57	20	26	21
OTU_766 (unc_Actinobacteria)	0	0	0	0	62	34	13	20	0	0	0	0
OTU_1195 (unc_Nitrospira)	9	0	10	13	12	15	15	16	31	11	16	13
OTU_780 (unc_Actinomarinicola)	21	35	27	27	0	9	6	10	7	10	12	16
OTU_2021 (unc_Actinobacteria)	38	17	16	14	8	22	14	17	6	0	8	8
OTU_844 (unc_Gp6)	0	0	0	0	25	35	19	20	23	5	8	12
OTU_1277 (unc_Erythrobacter)	0	6	0	9	5	8	23	13	30	24	29	18
OTU_1238 (unc_Gemmatimonadaceae)	52	33	30	67	0	0	0	0	0	0	0	4
OTU_529 (unc_Caldilineaceae)	0	0	0	0	18	31	39	53	0	0	0	0
OTU_1030 (unc_Bacteria)	0	0	0	0	18	28	31	28	0	7	21	15
OTU_1404 (unc_Betaproteobacteria)	0	0	0	0	14	13	17	13	40	17	36	6
OTU_1624 (unc_Myxococcales)	24	34	16	49	0	0	0	0	0	12	16	31
OTU_1861 (unc_Betaproteobacteria)	0	0	0	0	12	12	10	15	40	29	22	18
OTU_534 (unc_Acidobacteria)	97	100	0	4	0	0	0	0	0	0	0	0
OTU_808 (unc_Edaphobacter)	82	91	15	10	0	0	0	0	0	0	0	0
OTU_1409 (unc_Gp6)	0	0	0	0	18	23	30	24	48	3	0	0
OTU_1590 (unc_Bacteria)	0	0	0	0	28	60	18	28	2	0	0	0
OTU_1462 (unc_Gaiella)	0	0	0	0	28	10	26	22	16	22	16	5
OTU_8380 (unc_Gp17)	0	0	0	0	20	35	35	30	0	5	5	12
OTU_864 (unc_Chloroflexi)	0	0	0	0	5	21	26	35	17	30	6	13
OTU_288 (unc_Gp3)	33	17	45	64	0	0	0	0	0	6	0	13
OTU_501 (unc_Anaerolineaceae)	0	0	0	0	0	0	6	0	9	25	34	95
OTU_2308 (unc_Bacteria)	46	68	70	5	0	0	0	0	0	0	0	0
OTU_1884 (unc_Gp5)	9	4	22	42	6	10	14	4	6	13	14	19
OTU_2085 (unc_Hyphomicrobium)	0	0	0	0	27	30	44	26	0	10	0	0
OTU_3486 (unc_Gp3)	26	39	30	84	0	0	0	0	0	0	0	0
OTU_901 (unc_BRC1_genera_incertae_sedis)	35	70	30	41	0	0	0	0	0	6	0	4
OTU_1131 (unc_Acetobacteraceae)	81	67	21	20	0	0	0	0	0	0	0	0
OTU_1237 (unc_Planococcaceae)	19	14	8	9	10	0	0	5	16	15	52	15
OTU_488 (unc_Iamiaceae)	34	40	40	15	0	0	0	0	0	17	13	19
OTU_958 (unc_Bacteria)	0	0	0	0	0	0	0	7	41	41	31	43
OTU_1050 (unc_Gemmatimonadaceae)	59	122	15	0	0	0	0	0	0	0	0	0
OTU_1122 (unc_BRC1_genera_incertae_sedis)	14	12	4	19	5	23	19	19	13	11	5	11
OTU_882 (Nitrososphaera_viennensis)	8	0	14	28	0	0	0	0	10	35	36	35
OTU_774 (unc_Planifilum)	24	86	8	26	4	0	0	6	20	0	6	0
OTU_286 (unc_Acidimicrobiales)	0	0	8	8	13	14	15	15	10	18	25	23
OTU_948 (unc_Bacteria)	37	114	41	0	0	0	0	0	0	0	0	0
OTU_853 (unc_Acidimicrobiales)	21	35	19	10	0	0	15	19	14	12	15	7
OTU_1120 (unc_Blastocatellaceae)	0	4	0	44	5	11	11	26	15	12	14	10
OTU_508 (unc_Actinobacteria)	0	0	0	0	14	21	23	13	20	28	13	14
OTU_662 (unc_WPS-1_genera_incertae_sedis)	20	10	9	32	0	13	0	0	11	22	21	27
OTU_5679 (unc_Gp3)	36	115	33	7	0	0	0	0	0	0	0	0
OTU_648 (unc_Sphaerobacter)	81	80	21	5	0	0	0	0	0	0	0	0
OTU_1024 (unc_Bacteria)	0	0	0	15	0	23	27	27	16	12	17	11
OTU_1170 (unc_Gp10)	0	0	0	0	33	31	31	32	0	0	0	0
OTU_1212 (unc_Solirubrobacterales)	21	14	26	25	9	13	9	15	0	13	0	11
OTU_860 (unc_Phragmitibacter)	16	24	35	22	0	0	8	5	11	14	15	17
OTU_1255 (unc_Gp4)	0	0	0	0	0	0	0	9	23	49	22	57
OTU_918 (unc_Chloroflexi)	38	119	23	10	0	0	0	0	0	0	0	0
OTU_998 (unc_Bacteria)	0	0	0	0	11	24	25	31	31	13	5	0
OTU_1473 (unc_Actinobacteria)	0	0	0	0	12	37	42	42	0	0	0	0
OTU_688 (unc_Azospirillaceae)	48	105	8	11	4	0	0	4	0	0	4	0
OTU_723 (unc_Gemmatimonadaceae)	39	79	28	14	0	5	7	6	0	0	0	0
OTU_8748 (unc_Gaiella)	0	0	0	0	16	26	26	37	14	8	8	0
OTU_1325 (unc_Gp6)	0	0	0	0	16	27	26	32	7	11	10	7
OTU_606 (unc_Laceyella)	12	136	7	6	0	4	3	0	10	0	3	7
OTU_7341 (unc_Azotobacter)	0	0	0	0	4	6	12	109	0	0	0	0
OTU_1556 (unc_Solirubrobacterales)	0	0	0	0	22	29	34	31	0	4	4	6
OTU_1042 (unc_Chitinophagaceae)	15	20	9	15	0	0	0	0	19	33	26	27
OTU_757 (unc_Gp25)	0	0	0	0	7	2	5	2	55	52	15	14
OTU_1365 (unc_Bacteria)	0	0	0	0	0	12	0	9	55	46	15	16
OTU_1089 (unc_Nocardioides)	5	7	0	10	22	32	30	20	0	0	7	0
OTU_107 (unc_Actinobacteria)	0	0	0	0	0	62	40	32	0	0	0	0
OTU_6109 (unc_Anaerolineaceae)	0	0	0	23	7	8	17	27	0	15	18	29
OTU_1376 (unc_Proteobacteria)	0	0	0	0	17	30	42	39	0	0	0	0
OTU_4848 (unc_Acidobacteria)	3	0	9	6	0	6	6	10	17	7	67	21
OTU_1467 (unc_Gemmatimonadaceae)	0	0	7	42	0	0	0	0	7	14	46	40
OTU_1487 (unc_Roseomonas)	52	24	9	51	0	8	0	10	0	8	0	0
OTU_421 (unc_Iamiaceae)	22	11	18	17	0	10	10	9	10	10	16	22
OTU_472 (unc_Nocardioides)	27	24	30	70	0	0	0	0	12	0	0	0
OTU_3809 (unc_Gp6)	0	0	0	0	32	20	23	18	0	16	10	8
OTU_2425 (Gaiella_occulta)	0	0	4	0	19	18	27	23	18	5	6	12
OTU_1125 (unc_Pseudonocardia)	26	44	27	29	0	0	4	0	17	10	5	4
OTU_1011 (unc_Gp6)	0	0	0	0	35	36	22	27	0	0	0	0
OTU_781 (unc_Micromonosporaceae)	14	134	5	10	0	8	0	5	5	0	0	0
OTU_1836 (unc_Gp18)	0	0	0	0	28	22	32	26	0	9	3	5
OTU_824 (Aetherobacter_rufus)	10	8	6	8	14	20	22	12	0	10	18	12
OTU_1397 (unc_Bradyrhizobiaceae)	16	19	0	0	9	14	24	38	0	0	14	6
OTU_3077 (unc_Isosphaeraceae)	40	76	33	14	0	0	0	0	0	0	4	7
OTU_748 (unc_Spartobacteria_genera_incertae_sedis)	0	0	0	0	0	0	0	0	28	45	35	45
OTU_653 (unc_Gp1)	85	55	16	16	0	0	0	0	0	0	0	0
OTU_294 (unc_Acidobacteria)	0	0	0	0	34	16	21	16	11	7	6	13
OTU_8038 (unc_Rhizobiales)	0	3	0	0	23	22	8	12	23	20	10	11
OTU_2174 (unc_Gp4)	0	0	0	12	0	15	8	14	11	18	32	35
OTU_1005 (unc_Bacteria)	80	70	15	9	0	0	0	0	0	0	0	0
OTU_821 (unc_Chloroflexi)	10	0	9	56	0	0	0	0	12	6	30	29
OTU_505 (unc_Sphingobium)	0	0	0	6	0	46	22	15	23	21	0	4
OTU_9475 (unc_Gp6)	36	39	49	31	0	0	0	0	0	0	0	9
OTU_249 (unc_Iamiaceae)	7	7	24	23	0	7	0	13	19	15	24	10
OTU_1453 (unc_Deltaproteobacteria)	0	0	0	0	0	6	9	12	16	34	33	36
OTU_1772 (unc_Caldilineaceae)	0	0	0	0	7	13	25	32	10	14	22	11
OTU_362 (unc_Gp3)	0	0	0	0	9	7	9	9	28	34	28	17
OTU_1035 (unc_Bacteria)	0	0	0	0	19	45	26	30	0	0	0	2
OTU_1536 (unc_Tellurimicrobium)	20	58	20	10	0	6	8	0	0	16	12	13
OTU_762 (unc_Gp3)	0	0	0	4	20	16	11	23	19	5	22	9
OTU_4096 (unc_Gp6)	0	0	0	0	0	15	18	19	17	25	13	34
OTU_692 (unc_Gp6)	0	0	0	0	8	23	36	53	4	0	0	0
OTU_7979 (unc_Gaiella)	0	0	0	0	0	9	9	0	52	25	26	24
OTU_1322 (unc_Bacteria)	0	0	0	0	5	12	10	17	35	26	20	13
OTU_718 (unc_Dongia)	116	36	5	0	0	0	0	0	0	4	0	6
OTU_2165 (unc_Deltaproteobacteria)	0	0	0	0	5	22	19	11	8	36	18	18
OTU_9894 (unc_Hyphomicrobiaceae)	0	0	0	0	26	23	39	24	0	0	0	7
OTU_9040 (unc_Acidimicrobiales)	11	7	0	8	10	19	13	5	20	11	16	18
OTU_6935 (unc_Iamiaceae)	0	0	0	0	22	40	25	28	0	0	2	2
OTU_988 (unc_Kofleria)	12	12	54	31	0	0	5	5	5	7	4	16
OTU_299 (unc_Acidobacteria)	0	0	0	0	22	27	31	22	19	0	0	0
OTU_8972 (unc_Gp6)	0	0	16	38	0	0	0	0	0	17	35	42
OTU_396 (unc_Amycolatopsis)	45	63	0	24	0	0	12	0	0	0	0	19
OTU_7490 (unc_Pseudonocardia)	27	36	26	12	0	0	0	0	0	13	22	22
OTU_1072 (unc_Baekduia)	39	76	18	9	0	0	0	0	4	7	5	9
OTU_2009 (unc_Pontibacter)	0	0	0	0	5	28	17	31	17	14	13	5
OTU_567 (unc_Gemmatimonadaceae)	0	0	16	31	0	0	0	5	19	19	23	33
OTU_312 (Bacillus_kokeshiiformis)	40	0	21	34	0	0	0	0	54	0	0	0
OTU_825 (unc_Chloroflexi)	93	48	5	19	0	0	0	0	0	0	0	0
OTU_379 (unc_Rhizobiales)	0	0	0	0	13	8	9	10	14	20	32	28
OTU_458 (unc_Chloroflexi)	0	0	0	0	19	35	30	34	0	0	0	0
OTU_3318 (unc_Aridibacter)	5	0	0	10	8	21	13	9	13	10	28	17
OTU_8685 (unc_Methylobacteriaceae)	0	0	0	0	5	15	14	21	22	25	14	17
OTU_938 (unc_Bacteria)	22	22	14	34	0	0	0	0	11	15	13	20
OTU_2290 (unc_Acidimicrobiales)	0	0	0	0	31	14	28	17	0	7	10	10
OTU_1081 (unc_Iamiaceae)	0	13	9	26	0	15	21	20	6	17	10	0
OTU_525 (unc_Labrys)	17	0	9	19	0	12	14	9	0	24	21	15
OTU_1113 (Nitrososphaera_viennensis)	33	37	14	30	0	0	0	3	0	14	10	13
OTU_8082 (unc_Bacteria)	41	47	63	7	0	0	0	0	0	0	0	0
OTU_7959 (unc_Sphaerobacteraceae)	0	0	0	0	4	20	13	14	44	17	13	6
OTU_987 (unc_Thermoleophilia)	26	8	17	34	0	0	0	0	13	18	10	21
OTU_1391 (unc_Aeribacillus)	41	77	29	16	0	0	0	0	0	0	0	0
OTU_8167 (unc_Sphingomonadaceae)	0	0	0	0	16	29	9	15	13	15	12	14
OTU_1228 (unc_Solirubrobacterales)	41	47	20	10	5	7	4	4	6	3	0	3
OTU_1415 (unc_Gp3)	45	32	43	23	0	0	0	6	0	0	0	3
OTU_1251 (unc_Myxococcales)	0	0	0	8	0	15	31	57	5	3	3	0
OTU_1236 (Reyranella_terrae)	34	40	21	22	0	0	0	0	7	10	11	8
OTU_865 (unc_Dokdonella)	15	7	29	30	0	0	0	0	0	12	32	19
OTU_1075 (unc_Polyangiaceae)	0	8	0	0	0	8	18	21	0	23	25	31
OTU_1804 (unc_Flavisolibacter)	22	43	21	13	0	20	0	0	11	8	5	5
OTU_3937 (unc_Gp6)	0	0	0	0	23	30	27	16	8	8	0	3
OTU_1367 (unc_Actinobacteria)	0	0	0	0	0	0	0	9	28	37	25	39
OTU_4130 (unc_Bacteria)	0	0	7	34	4	0	4	10	8	18	26	24
OTU_888 (unc_Bacteria)	0	0	0	0	19	43	14	24	12	2	0	0
OTU_494 (unc_Rhizobiales)	0	16	0	0	0	8	13	10	32	26	18	14
OTU_546 (unc_Actinobacteria)	49	59	25	19	0	0	0	0	0	5	0	0
OTU_2473 (unc_Gp17)	0	0	0	0	16	18	15	21	21	10	13	6
OTU_2749 (unc_Gaiella)	14	0	10	7	9	11	0	9	12	25	10	25
OTU_1150 (unc_Gp16)	10	14	18	3	17	8	9	17	9	11	5	6
OTU_2171 (unc_Erythrobacteraceae)	20	11	12	16	5	16	13	24	0	6	0	7
OTU_788 (unc_Sphaerobacteraceae)	36	91	19	14	0	0	0	0	0	0	0	0
OTU_1085 (unc_Actinobacteria)	0	0	0	0	31	25	16	34	0	0	0	0
OTU_9144 (unc_Gp4)	0	0	0	0	21	19	16	29	19	7	0	2
OTU_1801 (unc_Bacteria)	0	0	0	16	11	28	16	8	4	13	13	13
OTU_414 (unc_Bacteria)	0	0	0	0	0	19	10	19	14	26	23	17
OTU_1635 (unc_Bacteria)	0	0	0	0	3	9	0	11	63	10	28	5
OTU_1049 (unc_Acidobacteria)	23	16	16	15	0	10	10	27	10	0	6	0
OTU_7832 (unc_Sporosarcina)	13	16	27	21	0	0	0	0	19	11	19	15
OTU_832 (unc_Gemmatimonadaceae)	39	65	35	15	0	0	0	0	0	0	0	0
OTU_851 (unc_Gp25)	0	0	0	0	0	0	0	0	20	43	38	35
OTU_1966 (unc_Acidobacteria)	0	0	0	0	19	42	20	23	3	3	0	0
OTU_9761 (unc_Gp6)	52	71	29	4	0	0	0	0	0	0	0	0
OTU_964 (unc_Solirubrobacterales)	26	37	50	34	0	0	0	0	0	0	0	0
OTU_954 (unc_Gemmatimonadaceae)	97	31	7	16	0	0	0	0	0	0	0	0
OTU_2624 (unc_Paenibacillus)	36	19	12	18	8	8	5	8	13	3	4	0
OTU_523 (unc_Rhizobiales)	0	0	0	0	10	23	17	17	26	6	12	7
OTU_3194 (unc_Gp6)	0	0	0	0	13	18	27	17	22	16	3	0
OTU_990 (unc_Bacteria)	0	0	0	0	0	0	11	25	4	37	34	16
OTU_7946 (unc_Chloroflexia)	26	8	32	69	0	0	0	0	0	0	3	0
OTU_976 (unc_Bacteria)	0	0	0	0	28	30	18	22	5	2	0	0
OTU_2865 (unc_Betaproteobacteria)	7	7	6	9	8	10	11	8	22	13	7	17
OTU_2899 (unc_Gemmatimonadaceae)	0	0	0	3	21	19	15	22	15	0	11	4
OTU_962 (unc_Chitinophagaceae)	7	14	18	15	0	0	0	0	13	17	27	25
OTU_1347 (unc_Actinomarinicola)	0	0	0	8	8	28	16	14	11	12	12	8
OTU_230 (unc_Baekduia)	0	0	0	0	0	41	36	35	0	0	0	0
OTU_717 (unc_Daejeonella)	0	0	0	4	13	24	14	22	7	12	7	10
OTU_301 (unc_Chloroflexi)	0	0	0	0	0	0	0	0	26	29	22	54
OTU_1055 (Acidibacter_ferrireducens)	133	13	0	0	0	0	0	0	0	0	0	0
OTU_1989 (Thermomonas_carbonis)	0	0	7	9	12	19	18	15	12	10	6	7
OTU_1654 (unc_Gp6)	0	0	0	21	4	0	8	0	17	32	31	14
OTU_797 (unc_Rhodospirillales)	26	84	33	8	0	0	0	0	0	0	0	0
OTU_1370 (unc_Rhizobiales)	0	0	0	0	18	26	29	17	10	2	5	0
OTU_803 (Aquicella_siphonis)	0	0	130	3	0	0	0	0	0	0	0	0
OTU_996 (unc_Stenotrophobacter)	0	0	0	14	18	34	13	20	3	0	2	3
OTU_1458 (unc_Blastocatellaceae)	0	0	0	3	3	0	9	4	26	22	31	27
OTU_4884 (unc_Gp4)	17	6	0	9	5	0	0	0	15	30	13	34
OTU_2949 (unc_Acetobacteraceae)	40	49	19	4	0	0	0	0	7	14	10	0
OTU_754 (unc_Bacteria)	10	7	7	19	0	0	0	0	10	22	29	27
OTU_2147 (unc_Gp6)	0	0	0	15	13	17	17	8	10	13	14	7
OTU_809 (unc_Gemmatimonadaceae)	64	75	8	3	0	0	0	0	0	0	0	0
OTU_1763 (unc_Myxococcales)	0	0	0	6	5	12	23	19	6	24	11	10
OTU_700 (unc_Bacteria)	0	0	0	0	0	13	0	0	47	22	27	15
OTU_2091 (unc_Gp7)	0	0	0	0	9	7	10	14	40	19	8	9
OTU_682 (unc_Arenimonas)	0	0	0	0	5	12	22	15	24	18	10	10
OTU_1740 (unc_Gp22)	0	0	0	0	11	7	20	13	22	14	14	13
OTU_782 (unc_Gp4)	0	0	0	0	0	0	0	0	23	32	41	31
OTU_898 (Pseudonocardia_hispaniensis)	0	0	0	0	15	12	14	16	15	8	14	17
OTU_945 (unc_Sphaerobacteraceae)	30	39	43	27	0	0	0	0	0	0	0	0
OTU_616 (unc_Paenibacillus)	25	25	20	27	0	0	0	0	12	3	17	5
OTU_863 (unc_Gp6)	28	46	54	12	0	0	0	0	0	0	0	0
OTU_991 (unc_Thermoactinomycetaceae1)	6	34	45	50	0	0	0	0	0	0	0	0
OTU_763 (unc_Solirubrobacterales)	16	141	0	0	0	0	0	0	0	0	0	0
OTU_777 (unc_Litorilinea)	0	0	0	0	4	12	24	29	16	8	13	6
OTU_1303 (unc_Actinobacteria)	0	0	0	0	27	19	11	27	12	4	0	0
OTU_403 (unc_Angustibacter)	29	21	0	73	0	0	0	0	0	10	0	0
OTU_6860 (unc_Lysinibacillus)	10	0	9	6	0	6	0	0	30	24	26	14
OTU_579 (unc_Ammoniphilus)	17	8	8	27	17	0	0	0	13	8	12	8
OTU_4858 (unc_Gp6)	0	0	0	0	13	0	8	0	16	29	18	32
OTU_1581 (unc_Myxococcales)	0	6	0	0	0	0	9	0	11	25	41	32
OTU_646 (unc_WPS-1_genera_incertae_sedis)	11	0	0	14	0	0	0	6	23	19	26	24
OTU_2436 (unc_Betaproteobacteria)	0	0	0	0	0	9	10	3	22	31	22	23
OTU_1248 (unc_Gp7)	0	0	0	0	26	8	20	26	15	4	0	0
OTU_2903 (unc_Gp6)	0	0	0	0	11	10	10	21	23	17	11	6
OTU_1882 (unc_Gemmatimonadaceae)	35	6	8	44	0	0	2	0	3	3	11	15
OTU_3066 (unc_Nocardioides)	0	0	0	0	3	16	16	13	22	20	13	10
OTU_779 (unc_Bacteria)	0	0	18	56	0	7	0	0	0	10	9	22
OTU_4413 (unc_Actinobacteria)	5	6	5	25	8	18	18	11	4	6	0	6
OTU_815 (unc_Gp3)	23	29	19	60	0	0	0	0	0	0	0	0
OTU_913 (Rhizocola_hellebori)	0	0	0	0	8	5	4	0	18	46	17	19
OTU_1693 (unc_Kallotenue)	48	21	15	30	0	0	0	0	3	4	0	10
OTU_1985 (unc_Chitinophagaceae)	0	0	0	0	4	8	0	4	33	35	8	25
OTU_1407 (unc_Steroidobacter)	0	0	0	7	6	4	2	11	28	14	26	16
OTU_778 (unc_Gemmatimonas)	114	19	0	3	0	0	0	0	0	0	0	0
OTU_1108 (unc_Rhizobiales)	0	0	0	7	9	11	14	11	16	22	13	7
OTU_2643 (unc_Rubellimicrobium)	4	3	0	4	11	24	21	16	6	3	10	3
OTU_2729 (Acidibacter_ferrireducens)	16	3	15	14	0	0	3	0	13	21	16	22
OTU_1317 (unc_Devosia)	0	0	0	0	8	18	15	12	14	10	26	5
OTU_571 (unc_Bacillus)	0	0	0	0	0	0	0	0	38	33	25	24
OTU_3635 (unc_Gp6)	7	0	14	0	0	0	0	0	18	42	17	24
OTU_758 (unc_Chthonomonas/Armatimonadetes_gp3)	36	56	25	19	0	0	0	0	0	0	0	0
OTU_1290 (unc_Labilithrix)	15	19	12	10	8	12	10	9	5	5	7	4
OTU_1313 (unc_Sphaerobacteraceae)	43	46	21	17	0	0	0	0	0	0	0	7
OTU_387 (unc_Bacteria)	0	0	0	0	11	25	14	13	19	16	6	0
OTU_1679 (unc_Gp17)	0	0	0	0	19	28	19	29	0	0	0	0
OTU_334 (unc_Actinobacteria)	0	0	0	0	0	10	9	9	16	25	21	24
OTU_6210 (unc_Myxococcales)	0	0	0	22	6	11	9	6	12	19	14	12
OTU_1302 (unc_Iamiaceae)	5	13	2	4	13	18	13	13	8	10	5	3
OTU_870 (unc_Betaproteobacteria)	17	18	71	18	0	0	0	0	0	0	0	2
OTU_1023 (unc_Geminicoccaceae)	0	0	0	0	21	31	23	19	0	0	0	0
OTU_2067 (unc_Gp10)	0	0	0	3	18	18	17	16	15	4	2	6
OTU_10072 (unc_Proteobacteria)	0	0	0	0	0	0	0	0	25	28	34	31
OTU_855 (unc_Saccharibacteria_genera_incertae_sedis)	38	35	37	20	0	0	0	0	0	0	0	0
OTU_2210 (unc_Bacteria)	0	0	0	13	11	4	20	14	16	6	9	12
OTU_841 (unc_Bacteria)	0	0	14	28	0	6	0	0	17	16	16	20
OTU_1048 (unc_Gp25)	0	0	0	0	0	0	0	0	14	34	38	32
OTU_1700 (unc_Solirubrobacterales)	12	26	15	9	7	6	5	9	6	7	8	7
OTU_6745 (unc_Bacillaceae1)	0	0	0	0	6	8	12	9	24	20	8	22
OTU_2496 (unc_Betaproteobacteria)	0	0	0	0	3	13	15	11	18	20	15	14
OTU_4186 (unc_Rhizobiales)	22	72	31	10	0	0	0	0	0	0	0	0
OTU_377 (unc_Actinobacteria)	4	0	0	0	0	0	0	0	29	25	25	34
OTU_1110 (unc_Caldilineaceae)	0	0	0	0	6	13	32	46	0	0	0	0
OTU_1320 (unc_Spartobacteria_genera_incertae_sedis)	0	0	0	0	0	0	0	0	16	28	28	45
OTU_2690 (unc_Micromonosporaceae)	6	0	7	10	0	8	12	5	11	11	26	17
OTU_1597 (unc_Gp25)	0	0	23	38	0	0	0	0	7	13	19	17
OTU_1718 (Paenibacillus_lactis)	39	26	12	12	4	0	0	0	11	0	12	7
OTU_4852 (unc_Comamonadaceae)	33	21	8	46	0	0	5	0	0	0	6	4
OTU_4355 (unc_Bacteria)	0	0	0	54	0	0	0	0	4	10	20	28
OTU_750 (unc_Anaerolineae)	63	67	4	2	0	0	0	0	0	0	0	0
OTU_1948 (unc_Paenibacillus)	17	24	34	46	0	0	0	2	0	0	0	0
OTU_2094 (unc_Gp4)	0	2	29	71	0	0	0	0	2	3	4	6
OTU_1204 (unc_Subdivision3_genera_incertae_sedis)	27	42	39	13	0	0	0	0	0	0	0	7
OTU_1904 (unc_Actinoplanes)	52	29	0	0	0	13	0	8	0	0	11	9
OTU_2115 (Brevibacillus_sediminis)	4	68	7	5	0	0	3	0	16	4	3	19
OTU_3169 (unc_Gp17)	0	0	0	0	13	13	4	17	12	21	10	11
OTU_2790 (unc_Latescibacteria_genera_incertae_sedis)	0	0	0	0	13	27	13	16	13	9	6	0
OTU_1266 (unc_Bacteria)	0	0	0	0	9	4	6	10	12	35	21	9
OTU_2172 (unc_BRC1)	3	4	0	6	5	20	10	15	7	4	27	3
OTU_1513 (unc_Bacteria)	0	0	0	0	33	23	18	10	3	0	0	0
OTU_480 (unc_Rhizobiales)	7	0	9	15	10	12	10	12	0	0	17	11
OTU_1199 (unc_Bacteria)	0	0	0	0	12	14	8	16	15	11	9	15
OTU_1146 (unc_Flavisolibacter)	9	13	3	75	0	0	0	0	4	7	2	4
OTU_1232 (unc_Sphaerobacteraceae)	0	0	0	0	17	28	23	23	0	0	0	0
OTU_1753 (unc_Chloroflexales)	0	0	0	0	16	27	17	28	0	0	3	0
OTU_1618 (unc_Gaiella)	4	10	8	11	6	8	9	12	6	7	12	14
OTU_2979 (unc_Myxococcales)	11	13	0	7	10	7	8	6	10	14	12	9
OTU_2041 (unc_Firmicutes)	17	4	16	8	2	9	5	2	2	31	6	10
OTU_1104 (unc_Bacteria)	27	22	29	28	4	0	0	2	3	0	0	2
OTU_951 (unc_Anaeromyxobacter)	0	87	39	5	0	0	0	0	0	0	0	0
OTU_1093 (unc_Polyangiaceae)	0	0	0	0	6	13	4	4	20	18	24	15
OTU_1394 (unc_Isosphaeraceae)	36	50	33	5	0	0	0	0	0	0	0	2
OTU_1959 (unc_Bacteria)	21	12	23	5	3	6	2	6	2	14	9	9
OTU_1488 (unc_Gp25)	0	0	0	0	0	5	0	6	4	25	35	34
OTU_1173 (unc_Chitinophagaceae)	17	65	39	6	0	0	0	0	0	0	0	0
OTU_2059 (unc_Solirubrobacterales)	4	0	0	0	21	25	13	15	3	4	5	0
OTU_2877 (unc_Micromonosporaceae)	0	0	0	8	3	5	5	4	24	18	18	21
OTU_1239 (unc_Iamiaceae)	0	0	0	0	12	19	28	31	0	0	0	0
OTU_2580 (unc_Subdivision3_genera_incertae_sedis)	0	0	0	8	3	8	8	5	9	17	19	28
OTU_1565 (unc_Subdivision3_genera_incertae_sedis)	26	11	47	32	0	0	0	0	0	0	0	0
OTU_708 (unc_Arboricoccus)	0	0	0	4	0	12	8	8	15	17	17	24
OTU_7663 (unc_Betaproteobacteria)	27	23	36	28	0	0	0	0	4	0	0	0
OTU_1432 (unc_Gaiella)	0	0	0	0	6	0	7	6	19	21	20	25
OTU_1413 (unc_Gammaproteobacteria)	36	25	30	14	0	0	0	0	0	0	6	8
OTU_1259 (unc_Bacteria)	27	31	22	34	0	0	0	0	3	0	0	2
OTU_524 (unc_Geminicoccaceae)	0	0	0	0	6	10	14	9	20	17	14	10
OTU_1371 (unc_Bacteria)	0	0	0	0	19	19	29	20	0	0	0	0
OTU_4190 (Fontibacillus_aquaticus)	18	5	3	0	7	20	40	5	0	0	0	0
OTU_6234 (unc_Micromonosporaceae)	59	50	10	6	0	0	0	0	0	0	0	0
OTU_738 (unc_Actinopolymorpha)	20	33	17	20	0	0	0	0	5	11	8	4
OTU_1217 (unc_Gp6)	0	0	0	0	14	25	28	14	0	5	0	4
OTU_1193 (unc_Clostridia)	40	15	10	14	0	8	10	3	12	0	0	0
OTU_1020 (unc_Thermomicrobia)	0	0	4	0	3	14	12	13	11	15	11	17
OTU_5560 (unc_Betaproteobacteria)	20	10	16	6	0	8	11	5	0	10	12	11
OTU_2444 (unc_Gp5)	0	0	0	6	10	12	12	8	10	13	22	4
OTU_1598 (unc_Anaerolineae)	0	0	0	0	22	22	23	18	0	0	0	0
OTU_1594 (unc_Adhaeribacter)	0	0	0	0	8	37	14	12	10	6	2	3
OTU_1902 (unc_Gp6)	0	0	0	0	9	8	16	15	29	9	6	3
OTU_1186 (unc_Novosphingobium)	11	21	0	5	21	18	14	5	0	0	0	0
OTU_739 (unc_Bacteria)	17	75	20	13	0	0	0	0	0	0	0	0
OTU_1805 (Parviterribacter_multiflagellatus)	3	2	0	8	16	19	8	11	11	5	4	5
OTU_5988 (unc_Erythrobacteraceae)	24	24	26	27	0	0	0	0	0	5	9	0
OTU_4262 (unc_Gp16)	0	0	0	0	5	19	30	12	15	7	3	3
OTU_1821 (unc_Bacteria)	0	0	0	0	14	22	20	20	4	5	0	3
OTU_654 (unc_Bacteria)	0	0	0	0	0	12	21	19	16	13	16	0
OTU_2089 (unc_Opitutaceae)	5	9	2	8	4	7	9	4	15	15	14	11
OTU_3604 (unc_Solirubrobacterales)	17	3	6	10	10	15	15	7	0	3	2	9
OTU_3158 (unc_Comamonadaceae)	27	18	16	18	0	0	0	11	0	0	10	10
OTU_95 (unc_Nocardioides)	0	0	0	0	0	56	0	0	0	0	39	0
OTU_1181 (unc_Nitrospira)	28	10	12	32	0	0	0	0	11	6	7	4
OTU_461 (unc_Actinobacteria)	36	13	36	27	0	0	0	0	0	0	0	0
OTU_856 (unc_Bacteria)	47	54	16	4	0	0	0	0	0	0	0	0
OTU_2057 (unc_Aggregatilinea)	33	19	21	27	0	0	0	0	0	0	4	8
OTU_1389 (unc_Proteobacteria)	0	3	10	15	0	0	4	6	16	9	25	15
OTU_2164 (unc_Gp7)	0	0	4	0	16	20	8	13	12	6	5	4
OTU_183 (unc_Solirubrobacterales)	0	0	0	0	0	23	0	18	21	0	0	34
OTU_2499 (unc_Nocardioides)	0	0	0	0	10	15	24	18	8	9	5	0
OTU_8949 (unc_Bacteria)	0	0	0	7	0	0	0	0	35	11	37	13
OTU_1525 (unc_Gp17)	0	0	0	0	10	16	25	15	7	5	5	6
OTU_517 (unc_Bosea)	0	0	0	0	26	16	18	11	0	0	0	11
OTU_3382 (unc_Pseudonocardiaceae)	25	70	8	13	0	0	0	0	0	0	0	5
OTU_1249 (unc_Bacteria)	11	0	18	14	0	8	0	8	8	9	17	9
OTU_2106 (unc_Chitinophagaceae)	25	26	12	14	0	0	0	3	6	6	8	11
OTU_5142 (unc_Gp6)	15	21	12	42	0	0	3	0	4	0	5	7
OTU_2084 (unc_Gp6)	0	0	0	0	13	7	18	10	24	8	5	5
OTU_838 (unc_Proteobacteria)	3	5	3	6	10	11	8	12	3	15	11	7
OTU_6404 (unc_Myxococcales)	7	20	7	13	4	3	7	8	8	9	4	13
OTU_1704 (unc_Bacteria)	0	0	0	0	14	19	9	26	13	4	0	0
OTU_7290 (unc_Chryseolinea)	0	0	0	0	12	18	0	7	23	5	24	2
OTU_615 (unc_Micromonosporaceae)	28	17	13	9	0	0	0	0	0	9	10	24
OTU_1957 (unc_Promicromonosporaceae)	0	26	0	0	0	0	0	16	12	13	15	23
OTU_1495 (unc_Paenibacillus)	10	9	6	3	0	8	19	5	13	13	7	8
OTU_897 (unc_Gp5)	0	5	8	4	0	0	0	0	0	24	14	50
OTU_975 (unc_Gemmatimonadaceae)	49	60	3	8	0	0	0	0	0	0	0	0
OTU_1441 (unc_Herpetosiphon)	0	0	0	0	15	19	19	26	0	2	0	2
OTU_1797 (unc_Bacteria)	0	0	0	0	3	25	22	25	9	4	0	0
OTU_1555 (unc_Gp11)	0	0	0	0	5	6	16	6	24	21	9	8
OTU_619 (Nitrososphaera_viennensis)	0	0	0	12	0	0	0	0	13	20	29	28
OTU_1743 (unc_Chromatiales)	0	0	0	0	8	13	9	8	14	10	21	9
OTU_1986 (unc_Longispora)	12	15	25	12	6	9	0	8	3	0	10	0
OTU_3078 (unc_Gp10)	0	0	0	0	22	9	19	7	0	5	15	7
OTU_759 (unc_Gp4)	0	0	0	0	0	13	0	16	16	22	10	19
OTU_1176 (unc_Ilumatobacter)	0	0	0	0	11	16	21	14	7	10	0	8
OTU_1667 (unc_Bacteria)	0	0	0	0	21	14	16	10	10	8	0	4
OTU_3013 (unc_Bacteria)	0	0	0	0	6	7	18	8	8	19	11	16
OTU_979 (unc_Actinobacteria)	28	36	19	7	0	0	0	0	0	4	9	9
OTU_2697 (unc_Gp6)	9	6	13	13	0	0	0	0	5	19	19	20
OTU_1516 (unc_Gemmatirosa)	12	19	29	43	0	0	0	0	0	0	4	0
OTU_5166 (unc_Firmicutes)	4	0	0	0	7	0	18	12	33	14	0	4
OTU_3001 (unc_Gp6)	0	0	0	0	16	17	17	10	7	16	2	0
OTU_2914 (unc_Opitutaceae)	8	28	27	0	0	3	4	7	3	14	6	6
OTU_5980 (unc_Gp6)	0	0	3	0	12	11	17	22	11	6	3	0
OTU_1791 (Stenotrophobacter_terrae)	0	0	0	0	5	0	0	4	11	20	22	35
OTU_2530 (unc_Rhodanobacteraceae)	0	0	0	0	6	27	20	12	9	11	2	0
OTU_1727 (unc_Acetobacteraceae)	42	46	12	14	0	0	0	0	0	0	0	0
OTU_324 (unc_Actinobacteria)	0	0	0	0	0	0	0	0	34	35	15	16
OTU_2260 (unc_Gp18)	0	0	0	0	3	17	10	9	23	19	5	6
OTU_3039 (Paenibacillus_arcticus)	9	4	6	0	0	9	5	0	10	23	11	23
OTU_2433 (unc_Marmoricola)	25	6	16	32	4	0	0	4	0	5	4	5
OTU_713 (unc_Actinobacteria)	41	12	31	23	0	0	0	0	0	0	0	0
OTU_1127 (unc_Latescibacteria_genera_incertae_sedis)	0	0	0	0	9	15	28	30	0	0	0	0
OTU_7248 (unc_Gp6)	0	0	0	0	17	16	20	13	7	5	4	0
OTU_1164 (unc_Gp6)	0	0	0	0	8	7	9	10	26	10	20	0
OTU_2020 (Acidibacter_ferrireducens)	38	50	11	0	0	0	0	0	3	5	4	3
OTU_983 (unc_Gemmatimonadaceae)	0	0	0	3	6	10	6	7	10	7	24	19
OTU_1087 (unc_Microbacterium)	0	0	0	0	0	0	0	0	0	65	36	0
OTU_730 (unc_Thermoleophilia)	0	0	0	0	6	13	17	20	14	7	10	0
OTU_1175 (unc_Gp5)	16	23	39	0	0	0	0	0	0	5	6	18
OTU_4645 (unc_Spartobacteria_genera_incertae_sedis)	10	7	3	8	9	8	10	14	5	7	7	3
OTU_1707 (unc_Bacteria)	0	0	0	0	6	24	21	27	2	0	3	0
OTU_1974 (unc_Rubellimicrobium)	4	0	0	0	16	12	16	24	2	2	5	0
OTU_1876 (unc_Gemmatimonadaceae)	0	0	0	15	6	4	8	9	0	10	24	16
OTU_1185 (unc_Bacteria)	0	0	0	0	7	39	20	16	0	0	0	0
OTU_2599 (unc_Caulobacter)	5	5	0	5	11	15	7	8	6	14	6	7
OTU_1043 (unc_Aquihabitans)	12	0	10	8	0	0	0	0	17	17	15	21
OTU_3649 (unc_WPS-1_genera_incertae_sedis)	3	3	0	3	0	10	4	5	14	21	17	16
OTU_1180 (unc_Bacteria)	0	0	0	0	10	37	14	19	0	0	0	0
OTU_3261 (unc_Gp16)	0	0	0	0	0	0	0	0	41	23	21	12
OTU_3594 (unc_Gp6)	0	0	0	0	9	9	12	17	11	16	4	8
OTU_1558 (unc_Gaiella)	0	0	0	0	0	16	15	8	14	13	11	14
OTU_1798 (unc_Enhygromyxa)	0	0	0	0	11	5	18	18	7	3	14	8
OTU_4402 (unc_Solirubrobacterales)	0	0	0	0	14	31	17	8	5	3	2	0
OTU_1222 (unc_Latescibacteria)	0	0	0	0	25	19	6	24	0	0	0	0
OTU_5446 (unc_Ilumatobacteraceae)	0	0	0	0	10	11	16	16	10	9	8	4
OTU_2341 (unc_Bacteria)	0	2	0	0	14	17	19	14	3	2	2	8
OTU_923 (unc_Acidimicrobiales)	5	0	21	19	4	0	4	0	8	12	16	6
OTU_5744 (unc_Symbiobacterium)	0	7	0	0	0	8	9	18	43	0	5	0
OTU_866 (unc_Bacteria)	0	0	0	0	0	0	0	0	29	20	20	27
OTU_486 (unc_Actinobacteria)	0	0	6	0	0	0	0	0	34	22	19	15
OTU_1599 (unc_Blastocatellaceae)	16	12	0	6	0	12	0	0	11	17	11	13
OTU_7849 (unc_Sporosarcina)	15	3	10	19	0	0	0	0	19	12	6	14
OTU_7258 (unc_Nocardioidaceae)	0	0	0	0	19	16	19	15	0	8	0	0
OTU_3873 (unc_Gp5)	0	0	4	8	2	7	9	8	7	20	11	15
OTU_1459 (unc_WPS-1_genera_incertae_sedis)	13	17	7	4	0	0	0	0	5	17	17	21
OTU_8659 (unc_Gaiella)	0	0	0	0	7	16	22	15	22	0	0	0
OTU_1541 (unc_Subdivision3_genera_incertae_sedis)	16	54	31	3	0	0	0	0	0	0	0	5
OTU_1526 (unc_Gp7)	0	0	11	8	9	0	6	7	10	5	10	22
OTU_1178 (unc_Bacteria)	103	2	0	0	0	0	0	0	0	0	0	0
OTU_1006 (unc_Myxococcales)	0	0	0	14	3	0	6	0	17	12	18	22
OTU_1013 (unc_Hymenobacter)	2	2	0	91	0	0	0	0	0	0	0	0
OTU_1867 (unc_Latescibacteria_genera_incertae_sedis)	0	0	0	6	23	7	6	10	0	10	6	10
OTU_1430 (unc_Acidimicrobiales)	19	26	12	15	3	8	5	0	2	2	6	0
OTU_1838 (unc_Gp7)	2	0	16	4	3	12	17	13	5	5	5	4
OTU_936 (unc_Actinobacteria)	5	0	42	20	0	0	0	0	5	9	0	15
OTU_1818 (unc_Rhizobacter)	0	0	0	0	11	25	19	6	0	8	6	5
OTU_817 (unc_Clostridiumsensustricto)	7	0	0	0	0	8	20	6	20	9	8	11
OTU_1749 (unc_Paenibacillus)	10	13	5	26	0	0	3	2	8	12	7	11
OTU_1022 (unc_Bacteria)	6	0	52	38	0	0	0	0	0	0	0	0
OTU_900 (unc_Proteobacteria)	7	32	33	27	0	0	0	0	0	3	0	0
OTU_1444 (unc_Gp4)	0	0	0	0	22	19	8	19	0	3	0	2
OTU_1213 (unc_Myxococcaceae)	24	0	0	28	0	4	3	12	5	6	3	7
OTU_1449 (unc_Nocardia)	0	0	0	0	12	3	9	13	15	11	14	5
OTU_2965 (unc_Polyangium)	5	0	0	10	0	10	3	22	4	9	13	11
OTU_5875 (unc_Microbacteriaceae)	25	18	8	34	0	0	4	0	5	0	0	5
OTU_3414 (unc_Rhizobiales)	16	12	6	4	6	17	11	8	5	3	0	0
OTU_2010 (unc_Subdivision3_genera_incertae_sedis)	55	8	27	9	0	0	0	0	0	0	0	2
OTU_1130 (Lysobacter_psychrotolerans)	0	0	0	0	7	20	25	21	3	0	2	0
OTU_3496 (unc_Thermoleophilia)	27	29	24	14	0	0	5	0	0	3	0	0
OTU_226 (unc_Rubrobacter)	0	0	0	0	0	20	18	0	23	26	0	0
OTU_1433 (unc_Bacteria)	0	0	0	0	17	14	17	25	0	0	0	0
OTU_2893 (unc_Solirubrobacterales)	0	0	0	1	24	14	15	13	0	1	1	3
OTU_2662 (unc_Acidobacteria)	0	0	0	0	8	4	11	10	29	10	5	6
OTU_2585 (unc_Gemmatimonadaceae)	0	0	0	0	7	3	5	10	14	17	19	10
OTU_2301 (unc_Gp16)	5	10	7	11	10	0	12	8	8	4	6	5
OTU_1363 (unc_Gp4)	0	0	0	0	17	7	9	15	11	6	6	6
OTU_2195 (unc_Gp4)	2	3	3	0	0	0	0	0	17	18	27	23
OTU_1372 (unc_Acidobacteria)	0	0	0	0	20	8	16	12	5	9	0	5
OTU_2672 (unc_Geodermatophilus)	37	50	8	4	3	0	0	2	0	0	0	0
OTU_5234 (unc_Bacillus)	16	6	11	10	0	0	0	0	14	14	9	15
OTU_2809 (unc_Litorilinea)	0	0	0	0	0	6	3	15	18	19	17	9
OTU_2598 (unc_Gp6)	6	0	2	3	13	19	15	13	3	0	3	0
OTU_620 (unc_Geminicoccaceae)	0	0	0	0	7	8	13	17	8	4	8	16
OTU_7932 (unc_Nonomuraea)	10	9	24	45	0	0	0	0	0	0	7	0
OTU_1031 (unc_Bacteria)	35	57	8	7	0	0	0	0	0	0	0	0
OTU_4383 (unc_Latescibacteria_genera_incertae_sedis)	0	0	0	0	10	7	11	13	2	19	5	14
OTU_6548 (unc_Gp6)	0	0	0	0	2	10	6	9	8	15	14	22
OTU_1117 (unc_Betaproteobacteria)	8	0	31	13	0	0	0	0	0	10	11	20
OTU_1395 (unc_Bacteria)	0	0	0	0	10	10	24	30	0	0	0	0
OTU_880 (unc_Actinobacteria)	0	0	5	12	5	18	5	15	3	4	7	7
OTU_1359 (unc_Terribacillus)	9	12	10	8	2	13	7	12	9	3	2	0
OTU_2270 (unc_Gemmatimonas)	2	2	0	16	2	16	7	0	8	17	8	8
OTU_1153 (unc_Gp3)	28	11	10	37	0	0	0	0	0	0	0	9
OTU_1643 (unc_Candidatus Solibacter)	16	43	23	9	0	0	0	0	0	0	0	10
OTU_660 (Nocardia_zapadnayensis)	17	20	26	8	0	0	0	0	6	6	13	0
OTU_4386 (unc_Opitutus)	10	19	13	4	0	0	0	0	14	16	4	15
OTU_3948 (unc_Gp6)	0	0	0	0	19	20	13	18	0	0	0	0
OTU_1118 (unc_Acetobacteraceae)	37	36	11	12	0	0	0	4	0	0	0	0
OTU_3336 (unc_Solirubrobacter)	32	28	21	18	0	0	0	0	0	0	0	0
OTU_2752 (unc_Microlunatus)	0	0	0	0	9	14	27	16	0	3	6	0
OTU_1243 (unc_Bacteria)	30	20	24	23	0	0	0	0	0	0	0	0
OTU_4380 (unc_Micromonosporaceae)	8	13	26	25	0	0	0	6	4	0	5	5
OTU_1268 (unc_Hyphomicrobium)	26	47	17	9	0	0	0	0	0	0	0	3
OTU_793 (unc_Rhodospirillales)	0	0	0	0	12	11	4	0	10	8	13	22
OTU_1545 (unc_Solirubrobacterales)	25	10	14	15	0	0	0	0	3	5	7	15
OTU_1475 (unc_Gemmatimonadaceae)	0	0	0	0	23	20	7	18	0	0	0	0
OTU_2467 (unc_Alphaproteobacteria)	9	10	25	12	0	3	2	4	3	5	11	7
OTU_9112 (unc_Pseudonocardia)	14	8	6	7	10	3	10	9	4	9	0	3
OTU_1977 (Tumebacillus_permanentifrigoris)	32	20	15	9	0	0	0	0	17	0	0	3
OTU_5585 (unc_Sphaerobacter)	18	39	14	19	0	0	0	0	0	0	3	6
OTU_1384 (unc_Anaerolineae)	0	0	0	0	11	16	27	15	4	0	0	0
OTU_1440 (unc_Spartobacteria_genera_incertae_sedis)	10	3	46	0	0	0	0	0	0	12	3	18
OTU_1915 (unc_Gp3)	0	0	0	0	12	13	19	15	3	6	2	4
OTU_4993 (unc_Nitrospira)	0	0	0	0	11	24	22	11	0	0	0	5
OTU_1231 (unc_Gp6)	0	0	23	66	0	0	0	0	0	0	0	0
OTU_1007 (unc_Thermobacillus)	14	60	10	3	0	0	0	0	13	0	2	0
OTU_1614 (unc_Gp7)	7	0	23	18	3	15	3	9	2	3	0	0
OTU_1247 (unc_Bacteria)	0	0	0	0	15	14	12	8	14	9	2	0
OTU_960 (unc_WPS-1_genera_incertae_sedis)	23	18	0	26	0	0	0	0	0	0	13	14
OTU_1309 (unc_Rhodospirillales)	8	4	9	3	10	0	8	2	7	11	8	13
OTU_4424 (unc_Streptosporangiaceae)	20	13	7	9	0	0	5	5	7	10	6	9
OTU_908 (unc_Arboricoccus)	29	43	16	12	0	0	0	0	0	0	0	0
OTU_2006 (unc_Acidobacteria)	0	0	0	0	12	18	23	18	0	0	0	0
OTU_889 (unc_Actinobacteria)	38	23	12	17	0	0	0	0	3	0	3	0
OTU_1353 (unc_Microlunatus)	44	25	11	17	0	0	0	0	0	0	0	0
OTU_5539 (unc_Actinomarinicola)	19	34	21	14	3	0	0	0	4	0	0	0
OTU_1697 (unc_Subdivision3_genera_incertae_sedis)	0	0	0	0	6	3	17	7	0	22	11	14
OTU_8303 (unc_Paenibacillus)	21	13	11	19	0	9	0	0	6	0	8	3
OTU_2233 (Asprobacter_aquaticus)	7	3	0	3	0	0	0	0	12	18	29	16
OTU_1756 (unc_Spartobacteria_genera_incertae_sedis)	0	3	22	6	0	0	0	0	7	13	23	14
OTU_1632 (unc_Gp17)	0	0	0	0	11	8	21	21	2	6	3	0
OTU_252 (unc_Solirubrobacterales)	0	0	0	0	0	0	0	0	13	21	13	40
OTU_2110 (unc_Shimazuella)	10	24	16	39	0	0	0	0	0	2	0	2
OTU_452 (unc_Chitinophagaceae)	6	8	27	16	0	5	0	0	0	7	0	20
OTU_1082 (unc_CandidatusSaccharibacteria)	0	54	45	0	0	0	0	0	0	0	0	0
OTU_1119 (unc_Actinomarinicola)	0	0	0	0	7	9	9	7	17	8	6	15
OTU_3093 (unc_Betaproteobacteria)	0	0	8	10	10	12	10	16	4	0	0	4
OTU_1039 (unc_Gp3)	19	33	40	4	0	0	0	0	0	0	0	0
OTU_2356 (unc_Gp4)	0	0	0	0	5	9	8	11	3	23	4	16
OTU_795 (unc_Ilumatobacteraceae)	0	7	0	0	6	8	8	21	9	6	12	0
OTU_1715 (unc_Kallotenue)	36	29	19	10	0	0	0	0	0	0	0	2
OTU_3086 (unc_Myxococcales)	0	9	0	9	8	8	9	8	0	13	9	6
OTU_2653 (unc_Chloroflexi)	11	8	0	0	0	17	6	4	8	18	0	12
OTU_1620 (unc_Anaerolineaceae)	0	0	0	0	12	18	19	15	1	4	1	0
OTU_1726 (unc_Gp2)	7	20	19	4	5	0	4	3	3	9	8	5
OTU_1834 (unc_Gp1)	11	6	53	19	0	0	0	0	0	0	0	0
OTU_3436 (unc_Gp4)	0	0	0	0	9	0	5	0	26	16	13	10
OTU_1476 (unc_Gp6)	41	23	6	0	0	0	0	0	0	6	10	8
OTU_1864 (unc_Roseisolibacter)	11	0	0	3	8	12	13	12	8	3	2	3
OTU_2287 (unc_Roseisolibacter)	0	0	4	0	7	10	3	0	12	12	8	23
OTU_4314 (unc_Sphingomonas)	0	4	0	14	2	6	5	12	12	8	11	6
OTU_1708 (unc_Gemmatimonadaceae)	9	17	34	30	0	0	0	0	0	0	0	0
OTU_857 (unc_Rhizobiales)	0	0	0	0	14	10	17	18	5	5	0	0
OTU_1273 (unc_Solirubrobacterales)	0	0	6	6	3	7	3	8	17	4	22	3
OTU_3952 (unc_Spartobacteria_genera_incertae_sedis)	13	28	24	22	0	0	0	0	0	0	0	5
OTU_1009 (unc_Bacteria)	0	2	34	49	0	0	0	0	0	0	0	0
OTU_981 (unc_Steroidobacteraceae)	24	24	40	4	0	0	0	0	0	0	0	0
OTU_1018 (unc_Firmicutes)	0	0	0	0	0	9	24	11	14	10	8	0
OTU_7114 (unc_Actinobacteria)	21	33	29	10	0	0	0	0	0	0	0	0
OTU_1886 (unc_Gp1)	0	16	54	18	0	0	0	0	0	0	0	0
OTU_2678 (unc_Gemmatimonadetes)	10	12	13	8	6	4	5	5	6	6	6	0
OTU_1899 (unc_Gemmatimonadaceae)	0	0	0	12	0	12	0	0	10	22	15	10
OTU_1349 (unc_Ilumatobacteraceae)	3	3	0	10	7	9	11	9	0	6	8	9
OTU_1626 (Caldibacillus_debilis)	21	58	8	10	0	0	0	0	0	0	0	0
OTU_684 (unc_Iamiaceae)	0	0	0	3	3	14	12	9	14	14	0	6
OTU_1201 (unc_Bacteria)	2	0	19	62	0	0	0	0	0	0	0	0
OTU_1084 (Brevitalea_aridisoli)	3	5	13	11	0	0	0	0	15	19	7	11
OTU_811 (unc_Burkholderiales)	0	0	0	0	0	5	0	0	14	16	34	12
OTU_1916 (unc_Cystobacteraceae)	18	7	7	14	0	4	6	8	4	4	5	5
OTU_314 (unc_Gp17)	0	0	0	0	0	22	25	14	0	11	0	0
OTU_1041 (unc_Gemmatimonadaceae)	7	9	28	41	0	0	0	0	0	0	0	0
OTU_1066 (unc_Bacteria)	0	0	0	0	5	6	0	0	9	14	19	25
OTU_881 (unc_Gp3)	25	23	38	4	0	0	0	0	0	0	0	0
OTU_4297 (unc_Betaproteobacteria)	0	0	2	0	0	12	15	8	10	13	7	9
OTU_3152 (unc_Conexibacter)	14	21	5	11	19	0	4	2	0	0	0	0
OTU_1683 (unc_Rhodanobacteraceae)	41	35	7	10	0	0	0	0	0	0	0	0
OTU_1512 (unc_Gp6)	0	0	0	0	14	26	13	12	0	0	0	0
OTU_3216 (unc_Anoxybacillus)	11	32	6	6	0	0	0	0	18	6	7	3
OTU_1783 (unc_Solirubrobacterales)	30	38	23	2	0	0	0	0	0	0	0	0
OTU_1968 (unc_Spartobacteria_genera_incertae_sedis)	0	0	3	4	4	15	15	9	5	10	5	3
OTU_914 (unc_Lysobacter)	17	0	0	0	10	10	10	7	4	5	0	10
OTU_1853 (unc_Chloroflexi)	0	0	0	0	24	6	7	8	12	3	2	2
OTU_1235 (unc_Bacteria)	0	0	0	0	14	24	12	13	0	2	0	0
OTU_1079 (unc_Betaproteobacteria)	0	0	0	0	5	8	15	8	15	7	11	4
OTU_5377 (unc_Gp25)	0	0	0	0	2	3	0	2	18	17	19	18
OTU_8015 (unc_Bacteria)	0	0	0	11	0	0	0	3	17	6	22	21
OTU_1198 (unc_Solirubrobacterales)	18	57	16	4	0	0	0	0	0	0	0	0
OTU_3024 (Longimicrobium_terrae)	0	0	0	0	1	32	8	26	0	0	1	0
OTU_2680 (unc_Gp6)	0	0	0	0	4	6	7	7	16	15	8	12
OTU_2139 (unc_Subdivision3_genera_incertae_sedis)	8	13	11	15	0	5	4	0	7	7	4	9
OTU_7427 (unc_Spartobacteria_genera_incertae_sedis)	0	21	31	12	0	0	0	0	0	5	7	10
OTU_1537 (unc_Paenibacillus)	16	13	15	22	0	2	2	2	7	3	0	2
OTU_2414 (unc_Rhizobiales)	9	5	0	3	5	4	13	7	21	4	4	0
OTU_2133 (unc_Rhodothermales)	0	0	0	0	18	20	9	12	3	0	1	0
OTU_1298 (unc_Gp25)	0	0	0	0	0	0	0	0	9	32	9	31
OTU_3728 (unc_Sphaerobacteraceae)	0	0	1	8	1	7	6	6	21	14	6	6
OTU_1503 (unc_Actinobacteria)	19	17	6	10	9	0	0	3	4	6	3	3
OTU_1648 (unc_Betaproteobacteria)	0	0	0	0	12	20	15	17	0	0	0	0
OTU_1641 (unc_Bacteria)	0	0	0	0	0	0	8	22	0	8	0	36
OTU_867 (unc_Gp1)	5	4	51	19	0	0	0	0	3	0	0	0
OTU_1187 (Rummeliibacillus_pycnus)	10	21	13	6	0	0	0	0	6	11	13	5
OTU_2575 (unc_Labilithrix)	14	6	26	14	2	0	3	0	2	2	7	5
OTU_6959 (unc_Solirubrobacterales)	14	35	9	0	0	0	0	0	6	6	8	10
OTU_1858 (unc_Bacteria)	24	31	20	11	0	0	0	2	0	0	0	0
OTU_1038 (unc_Chitinophagaceae)	13	50	15	9	0	0	0	0	0	0	0	4
OTU_2484 (unc_Sphaerobacteraceae)	11	40	29	9	0	0	0	0	0	0	0	0
OTU_749 (unc_Acidobacteria)	39	0	23	21	0	0	0	0	0	0	0	0
OTU_5809 (unc_Gp1)	0	0	0	0	0	0	0	0	11	21	16	31
OTU_862 (Herbinix_luporum)	0	4	4	0	0	0	0	0	58	7	5	0
OTU_2196 (unc_Xanthomonadales)	0	0	0	0	11	6	14	25	8	0	0	0
OTU_1203 (Nitrososphaera_viennensis)	14	24	8	0	0	0	0	0	6	9	16	8
OTU_7436 (unc_Gemmatimonas)	9	6	0	27	2	2	0	0	7	10	5	11
OTU_2027 (unc_Thermoplasmata)	0	0	0	0	9	10	2	5	5	10	15	14
OTU_2324 (unc_Alphaproteobacteria)	34	36	14	5	0	0	0	0	0	0	0	0
OTU_3615 (unc_Bacteria)	0	0	0	1	10	12	16	19	1	1	3	1
OTU_1406 (unc_Betaproteobacteria)	37	30	17	4	0	0	0	0	0	0	0	0
OTU_8938 (unc_Stenotrophobacter)	0	0	0	3	25	13	4	10	0	4	0	0
OTU_1012 (unc_Bacteria)	25	49	11	2	0	3	0	0	0	0	0	0
OTU_6539 (unc_Gp6)	0	0	0	0	3	11	9	7	12	15	11	3
OTU_2919 (unc_Litorilinea)	0	0	0	0	3	6	11	8	16	9	8	10
OTU_1615 (unc_Rhizobiales)	0	0	0	0	0	0	0	0	19	13	13	32
OTU_1773 (unc_Subdivision3_genera_incertae_sedis)	0	0	0	0	4	3	2	0	9	7	18	31
OTU_1881 (unc_Bacteria)	0	0	0	0	10	16	17	16	2	2	0	0
OTU_3217 (Paenibacillus_koleovorans)	13	0	3	10	0	0	0	0	18	10	10	14
OTU_1745 (unc_Solirubrobacterales)	8	10	13	13	0	5	4	4	0	6	7	8
OTU_2101 (unc_Lachnospiraceae)	0	0	8	6	0	0	3	3	18	23	10	5
OTU_1774 (Adhaeribacter_aquaticus)	0	0	0	5	3	14	2	5	17	10	10	5
OTU_1496 (unc_Bacteria)	0	0	0	0	9	21	22	9	2	0	0	0
OTU_2056 (unc_Gemmatimonadaceae)	16	20	28	17	0	0	0	0	0	0	0	2
OTU_6246 (unc_Gp6)	5	0	5	6	0	4	0	0	18	10	13	15
OTU_2977 (unc_Bacteria)	0	0	0	0	16	9	20	15	0	0	0	0
OTU_1071 (unc_Gp9)	0	0	0	0	4	14	28	18	0	0	0	0
OTU_1724 (unc_Gp6)	0	0	0	0	8	4	0	0	18	24	13	4
OTU_1945 (unc_Chloroplast)	16	7	0	7	3	15	8	3	2	4	3	5
OTU_679 (unc_Actinophytocola)	34	8	14	18	0	0	0	0	0	0	7	0
OTU_1868 (Aquabacterium_pictum)	0	0	0	0	6	13	10	19	0	8	0	9
OTU_2686 (unc_Polyangiaceae)	0	10	9	14	4	0	0	0	0	9	12	18
OTU_3028 (unc_Myxococcales)	0	0	0	0	5	2	2	0	12	11	25	15
OTU_2150 (unc_Gp6)	0	0	0	0	20	12	14	12	0	0	0	0
OTU_3435 (unc_Rhizobacter)	0	0	0	0	10	20	6	0	0	13	8	9
OTU_970 (unc_Acidimicrobiales)	0	0	0	9	4	13	9	3	5	5	11	10
OTU_2184 (unc_Rhizobiales)	0	20	0	16	0	0	0	0	0	23	7	14
OTU_3716 (unc_Bacteroidetes)	5	3	2	7	2	2	0	0	8	14	12	20
OTU_2178 (unc_Propionispira)	6	6	2	0	22	4	5	2	2	7	5	2
OTU_1161 (unc_Gp7)	18	3	58	0	0	0	0	0	0	0	0	0
OTU_980 (unc_Bacteria)	23	40	21	2	0	0	0	0	0	0	0	0
OTU_1257 (unc_Latescibacteria_genera_incertae_sedis)	6	4	25	23	0	0	0	0	0	0	4	15
OTU_2491 (unc_Gp6)	0	0	0	0	12	7	18	12	3	7	0	3
OTU_3544 (unc_Alphaproteobacteria)	15	20	17	3	0	4	3	3	3	3	3	5
OTU_1493 (unc_Gemmatimonadaceae)	4	25	25	20	0	0	0	0	0	3	2	2
OTU_2216 (unc_Gaiella)	8	0	0	10	0	6	0	0	18	18	6	8
OTU_6126 (unc_Gp7)	0	0	0	0	3	14	7	4	19	16	3	2
OTU_1909 (unc_Bacillales)	0	0	0	0	13	10	11	15	11	0	0	0
OTU_4295 (unc_Paenibacillus)	19	30	8	16	0	0	0	0	6	0	0	3
OTU_2208 (unc_Myxococcales)	0	0	0	2	5	2	5	5	8	17	15	10
OTU_1425 (unc_Bacteria)	0	0	0	0	0	5	2	8	1	13	25	17
OTU_1270 (unc_Anaerolineae)	0	0	0	0	12	3	0	12	5	18	11	3
OTU_6421 (unc_Solirubrobacterales)	3	0	2	2	16	9	7	6	5	2	6	3
OTU_8886 (unc_Terrisporobacter)	5	13	5	0	0	0	0	0	10	21	12	11
OTU_3564 (unc_Spartobacteria_genera_incertae_sedis)	3	3	4	22	4	0	9	4	0	0	9	12
OTU_786 (unc_Gp3)	0	0	0	0	0	0	0	0	15	13	19	26
OTU_873 (unc_Bacteria)	0	0	0	0	0	0	0	0	12	9	17	35
OTU_3113 (unc_Rhodobacteraceae)	0	0	0	0	6	29	14	8	0	0	2	2
OTU_1919 (unc_Actinobacteria)	0	0	0	0	12	10	29	8	0	0	0	0
OTU_1674 (unc_Bacteria)	0	0	0	0	25	17	8	4	0	0	0	0
OTU_580 (unc_Firmicutes)	0	0	0	0	0	0	16	11	40	0	0	0
OTU_822 (unc_Gemmatimonadaceae)	0	0	0	0	0	0	0	0	9	31	18	15
OTU_2365 (unc_Gemmatimonadetes)	0	0	0	0	3	17	18	12	2	8	3	0
OTU_1454 (unc_Bacteria)	0	0	0	1	0	0	0	0	20	13	15	23
OTU_1330 (unc_Rhodospirillales)	7	6	26	5	0	3	3	0	0	5	9	10
OTU_10125 (unc_Oxalobacteraceae)	4	4	0	6	4	11	5	21	0	2	0	7
OTU_1642 (unc_Gp6)	27	29	23	0	0	0	2	0	0	0	0	0
OTU_2591 (unc_Bacteria)	0	0	0	0	2	4	10	10	22	5	13	0
OTU_1563 (unc_Bacteria)	0	0	0	0	9	0	0	11	20	6	13	5
OTU_1921 (unc_Bacteria)	0	0	0	0	17	25	8	5	0	1	0	0
OTU_1318 (unc_Gp2)	10	14	44	8	0	0	0	0	0	0	1	0
OTU_6818 (unc_Gemmatimonadaceae)	0	2	0	13	0	0	0	0	2	5	34	16
OTU_1126 (unc_Saccharibacteria_genera_incertae_sedis)	25	10	29	13	0	0	0	0	0	0	0	0
OTU_5266 (unc_Bacteria)	0	0	2	0	7	14	8	6	3	3	12	8
OTU_1817 (unc_Bacteria)	0	0	0	0	18	10	11	16	0	0	0	0
OTU_1134 (unc_Gp4)	0	0	0	0	0	0	0	0	10	22	13	27
OTU_1723 (Pseudofulvimonas_gallinarii)	0	0	0	0	46	0	0	0	0	0	0	0
OTU_4265 (unc_Polyangiaceae)	4	0	0	8	3	13	11	6	5	0	6	9
OTU_496 (unc_Gp6)	0	0	0	0	0	0	0	0	30	18	9	14
OTU_588 (unc_Sphaerobacteraceae)	0	0	0	0	0	0	0	0	32	22	7	10
OTU_1279 (unc_Actinomarinicola)	0	0	0	0	0	17	18	9	6	5	4	5
OTU_2306 (unc_Anaerolineae)	12	6	11	31	0	0	0	0	0	3	5	6
OTU_1647 (unc_Chloroflexi)	8	38	19	11	0	0	0	2	2	0	0	0
OTU_3035 (unc_Solirubrobacterales)	0	0	0	0	12	14	21	6	1	1	1	2
OTU_968 (unc_Chloroflexi)	0	0	0	16	0	2	6	6	3	16	9	11
OTU_6933 (unc_Gp6)	0	0	11	29	0	0	0	0	10	5	8	8
OTU_4652 (unc_Solirubrobacterales)	0	0	0	0	0	4	8	9	12	9	17	8
OTU_4396 (unc_Phenylobacterium)	18	33	19	10	0	0	0	0	0	0	0	0
OTU_5705 (unc_Gp7)	0	0	0	0	5	11	3	7	17	11	8	2
OTU_2066 (unc_Gp6)	0	0	0	0	20	13	12	9	0	0	0	0
OTU_3260 (Allocatelliglobosispora_scoriae)	0	6	0	0	10	8	11	12	6	3	0	5
OTU_9111 (unc_Solirubrobacterales)	20	11	8	22	0	0	0	0	4	0	4	6
OTU_1167 (unc_Gemmatimonadaceae)	13	11	32	19	0	0	0	0	0	0	0	0
OTU_3372 (unc_Kallotenue)	0	0	0	0	10	7	13	19	1	3	3	2
OTU_1165 (unc_Geomonas)	0	0	0	0	2	21	13	14	0	3	8	0
OTU_1135 (unc_Gp3)	25	19	7	18	0	0	0	0	0	4	4	0
OTU_1417 (unc_Bacteria)	0	0	0	0	6	35	9	8	0	0	0	0
OTU_2205 (unc_Sporomusa)	0	2	10	33	0	0	0	17	2	0	3	0
OTU_9692 (unc_Comamonadaceae)	0	0	0	0	10	15	17	12	0	1	1	1
OTU_3769 (unc_Hymenobacter)	0	0	0	11	6	12	10	6	0	6	3	8
OTU_3954 (unc_Paenibacillus)	18	3	7	3	0	0	0	3	0	2	2	34
OTU_1799 (unc_Gp6)	0	0	10	38	0	0	0	0	0	0	2	20
OTU_719 (unc_Paracoccus)	0	0	0	0	15	0	0	0	28	0	17	0
OTU_1619 (unc_Gp3)	0	0	0	0	9	7	10	11	17	3	2	0
OTU_4410 (unc_Nevskiales)	0	0	0	0	2	10	20	13	4	5	4	3
OTU_2296 (unc_Niastella)	3	12	0	3	0	3	0	3	4	15	17	11
OTU_3395 (unc_Bacteria)	0	0	0	0	6	18	9	16	3	1	0	5
OTU_2546 (unc_Gp6)	0	0	0	0	10	4	13	9	13	6	2	2
OTU_1385 (unc_Acidobacteria)	0	0	0	0	7	5	7	10	2	4	16	10
OTU_1293 (unc_Bacteria)	14	17	14	26	0	0	0	0	0	0	0	3
OTU_1628 (unc_Aggregicoccus)	16	8	0	13	0	0	3	7	0	4	8	11
OTU_2381 (Nibribacter_koreensis)	0	0	0	0	0	3	5	2	17	20	10	10
OTU_3031 (unc_Gaiella)	14	22	20	19	0	0	0	0	0	0	0	0
OTU_2213 (unc_Betaproteobacteria)	0	0	0	0	10	8	9	12	3	9	0	7
OTU_5256 (unc_Phaselicystis)	2	9	2	10	13	6	3	0	0	3	3	11
OTU_1295 (unc_Gp25)	0	0	0	0	0	0	0	0	31	20	8	9
OTU_2203 (unc_Gp6)	0	0	0	0	10	3	5	18	2	12	4	4
OTU_1733 (unc_Bacteria)	0	0	0	0	5	6	12	4	11	8	5	11
OTU_554 (unc_Sphaerobacteraceae)	0	0	6	24	6	0	15	10	0	0	0	0
OTU_4228 (unc_Gemmatimonas)	4	0	0	0	0	0	0	0	0	12	22	31
OTU_2916 (unc_Gemmatimonadaceae)	0	0	0	1	0	0	0	0	33	5	24	4
OTU_1658 (unc_Demequina)	0	0	0	0	24	10	5	11	0	0	0	0
OTU_1314 (unc_Bacteria)	18	7	29	16	0	0	0	0	0	0	1	1
OTU_3022 (unc_Actinobacteria)	0	0	0	0	3	2	12	12	26	1	5	0
OTU_1542 (unc_Chitinophagaceae)	0	0	0	0	6	5	1	4	29	8	6	3
OTU_1962 (unc_Gp16)	0	0	0	3	0	0	3	8	24	6	17	4
OTU_2440 (unc_Actinobacteria)	0	0	0	0	0	0	0	0	32	12	18	5
OTU_3640 (unc_Actinobacteria)	0	0	0	0	15	0	4	1	29	5	2	2
OTU_2757 (unc_Actinobacteria)	0	0	2	25	3	5	11	3	6	5	3	0
OTU_1159 (unc_Bacteria)	25	42	8	4	0	0	0	0	0	0	0	0
OTU_9273 (unc_Bacteria)	0	2	0	13	3	12	5	3	5	7	4	9
OTU_2271 (unc_Gp17)	12	26	21	4	0	4	3	3	0	0	0	0
OTU_3703 (uncultured_Acidobacteria)	0	0	0	6	2	5	8	10	11	6	11	3
OTU_1837 (unc_Bacteria)	0	0	0	0	2	4	4	0	14	17	9	15
OTU_519 (unc_Gemmatimonadaceae)	0	0	0	0	0	0	0	0	0	27	18	23
OTU_2663 (unc_Bacteria)	0	0	0	0	7	20	17	11	0	0	0	0
OTU_644 (unc_Alsobacter)	21	19	7	22	0	0	0	0	0	0	0	4
OTU_1242 (unc_Asprobacter)	0	0	0	0	0	5	6	5	14	15	12	7
OTU_8220 (unc_Arenimonas)	0	0	0	0	9	9	8	14	5	4	3	4
OTU_6122 (unc_Bacteria)	0	0	0	0	5	20	14	11	5	1	0	0
OTU_4025 (unc_Kofleria)	0	0	0	4	8	12	16	9	2	5	0	0
OTU_3805 (unc_Bacteria)	0	0	0	0	15	9	4	14	5	6	0	0
OTU_3456 (unc_Bacteria)	0	0	0	1	11	5	8	10	7	2	5	7
OTU_5165 (unc_Gp6)	0	0	0	0	0	0	4	0	9	19	14	20
OTU_1265 (unc_Gp6)	0	0	0	0	0	0	0	0	19	17	13	17
OTU_4123 (unc_Acidimicrobiales)	0	0	0	0	11	17	14	10	1	0	0	0
OTU_1877 (unc_Myxococcales)	12	20	23	11	0	0	0	0	2	2	2	0
OTU_3165 (unc_Comamonadaceae)	6	5	0	12	0	0	6	3	8	5	13	8
OTU_820 (unc_Novosphingobium)	0	0	0	0	29	0	0	0	0	11	10	0
OTU_5353 (unc_Subdivision3_genera_incertae_sedis)	4	4	6	4	2	4	0	2	7	10	8	14
OTU_1530 (unc_Betaproteobacteria)	0	0	0	0	3	4	3	8	12	9	14	8
OTU_2706 (unc_Actinobacteria)	2	0	0	6	10	8	8	4	2	11	2	4
OTU_1709 (unc_Bacteria)	0	0	0	0	3	10	19	20	2	0	1	0
OTU_7113 (unc_Actinobacteria)	0	0	0	0	7	16	15	7	4	4	0	2
OTU_9934 (unc_Anaerolineaceae)	0	0	0	0	17	5	3	24	0	0	0	0
OTU_3394 (unc_Gp10)	0	0	0	0	11	5	4	2	28	0	6	0
OTU_4600 (unc_Nocardioides)	0	3	0	6	9	14	7	9	3	0	4	0
OTU_2428 (unc_Kallotenue)	0	0	0	0	0	6	0	0	6	25	13	14
OTU_6981 (unc_Latescibacteria_genera_incertae_sedis)	0	0	0	0	12	8	16	11	2	3	0	0
OTU_1206 (unc_Gp1)	18	20	20	0	0	0	0	0	0	3	5	5
OTU_1666 (unc_Gp6)	0	0	27	2	3	3	2	0	0	4	5	17
OTU_3687 (unc_Aggregatilinea)	0	0	0	0	2	7	5	5	24	17	0	0
OTU_1405 (unc_Burkholderiales)	0	0	0	0	0	0	5	7	8	8	19	15
OTU_1554 (Paenibacillus_baekrokdamisoli)	14	13	7	4	4	3	3	2	5	8	0	2
OTU_2182 (unc_Bacteria)	0	0	0	0	0	9	0	2	27	21	1	2
OTU_2146 (unc_Solirubrobacterales)	3	2	4	9	9	11	8	5	2	3	0	0
OTU_1053 (unc_Bacteria)	17	17	23	13	0	0	0	0	0	0	0	0
OTU_3225 (unc_Arenimicrobium)	0	0	0	0	6	26	2	8	11	1	0	0
OTU_2812 (unc_Isosphaeraceae)	26	29	9	0	0	0	0	0	0	3	3	3
OTU_1579 (unc_Kofleria)	11	11	21	25	0	0	0	0	0	0	0	0
OTU_2502 (unc_Bacillaceae2)	2	0	2	4	0	0	0	0	7	33	10	7
OTU_1978 (unc_Vampirovibrio)	17	5	12	16	0	0	0	0	3	4	6	4
OTU_5663 (Arboricoccus_pini)	0	0	0	0	7	9	20	13	4	0	0	0
OTU_3530 (unc_Paenibacillaceae1)	2	4	6	38	0	2	2	6	3	0	0	0
OTU_1954 (Nocardioides_dilutus)	0	0	0	0	6	21	4	15	4	3	0	0
OTU_1421 (unc_Gp16)	12	20	16	7	0	0	0	0	14	0	0	0
OTU_2574 (Gaiella_occulta)	0	0	0	0	0	0	0	0	13	26	11	14
OTU_3713 (unc_Betaproteobacteria)	0	0	0	0	2	0	0	4	12	6	33	4
OTU_7731 (unc_Mycobacteriales)	0	0	0	0	0	0	0	0	16	29	0	19
OTU_2189 (unc_Caldilineaceae)	0	0	0	0	7	11	3	10	6	3	6	9
OTU_1256 (unc_Bacteria)	7	5	0	7	0	0	0	5	9	18	6	7
OTU_1451 (unc_Gp25)	0	0	0	0	2	17	16	18	0	0	0	0
OTU_2250 (unc_Paenibacillus)	7	5	5	5	0	0	0	0	9	12	6	16
OTU_575 (unc_Gp6)	0	0	21	0	0	0	0	0	0	14	15	14
OTU_9865 (unc_Mycobacterium)	24	13	10	9	0	0	0	0	0	0	12	0
OTU_4543 (unc_Roseisolibacter)	5	4	6	21	2	4	7	7	0	1	0	3
OTU_2225 (unc_Bacteria)	0	0	0	0	0	1	2	4	22	14	16	2
OTU_7758 (unc_Bacillus)	4	4	3	9	0	4	5	7	8	10	4	3
OTU_2384 (unc_Gp6)	3	1	2	10	0	0	0	0	6	9	19	13
OTU_3083 (unc_Gp10)	0	0	2	19	6	2	2	6	4	0	14	2
OTU_1742 (unc_Chloroflexi)	0	0	0	0	0	0	0	0	4	19	11	29
OTU_485 (unc_Gaiella)	0	0	0	0	0	0	0	11	18	20	11	0
OTU_1612 (unc_Actinobacteria)	0	0	0	8	4	0	0	1	13	15	9	10
OTU_1950 (unc_Bacteria)	0	0	0	0	0	0	0	0	0	19	16	28
OTU_5968 (unc_Noviherbaspirillum)	5	2	0	3	2	15	11	10	2	3	0	3
OTU_5090 (unc_Daejeonella)	0	0	0	2	0	16	6	3	10	6	7	8
OTU_656 (unc_Ornithinibacter)	0	0	0	0	15	13	21	0	0	0	0	0
OTU_2117 (unc_Burkholderiales)	8	17	18	23	0	0	0	0	0	0	0	1
OTU_386 (unc_Devosia)	0	0	0	0	40	0	0	0	0	0	0	0
OTU_4933 (unc_Subdivision3_genera_incertae_sedis)	15	10	23	12	0	1	1	0	1	1	1	1
OTU_1875 (unc_Gp25)	0	0	0	0	5	3	0	0	34	7	0	9
OTU_3205 (unc_Gp6)	0	0	0	0	8	11	26	6	0	0	0	0
OTU_1706 (unc_Myxococcales)	0	2	35	2	0	0	3	0	5	6	7	3
OTU_1687 (unc_Gemmatimonadaceae)	4	11	46	5	0	0	0	0	0	0	0	0
OTU_2541 (unc_Bacteria)	0	0	0	1	10	14	11	7	1	3	4	0
OTU_657 (unc_Actinobacteria)	0	0	0	0	11	0	6	13	10	7	5	0
OTU_8004 (unc_Gp6)	0	0	0	7	0	0	0	4	5	12	13	20
OTU_7440 (unc_Kofleria)	2	0	3	17	0	0	0	0	2	9	17	12
OTU_1803 (unc_WPS-2_genera_incertae_sedis)	14	27	14	14	0	0	0	0	0	0	0	0
OTU_1859 (unc_Chloroflexi)	0	0	0	0	3	5	7	11	7	14	4	5
OTU_2938 (unc_Anaerocolumna)	11	8	9	20	0	0	4	0	3	3	2	4
OTU_2082 (unc_Actinobacteria)	0	2	0	3	11	13	12	5	0	3	2	0
OTU_2078 (uncultured_soil)	0	0	0	0	0	6	6	6	18	9	8	5
OTU_1501 (Geminicoccus_roseus)	0	0	0	1	3	4	4	8	7	13	6	11
OTU_2399 (unc_Gp4)	18	0	4	7	0	0	0	2	3	10	5	14
OTU_9123 (unc_Planococcaceae)	0	0	3	0	0	0	4	0	33	4	7	9
OTU_9136 (unc_Thermomonosporaceae)	2	0	0	2	5	28	0	3	3	3	6	1
OTU_1769 (unc_Bacteria)	0	0	0	0	7	17	16	10	0	0	0	0
OTU_764 (Ureibacillus_thermosphaericus)	0	12	0	0	0	0	0	0	50	0	0	0
OTU_3932 (unc_Gp6)	3	4	0	2	2	6	5	7	3	14	6	6
OTU_1524 (unc_Actinomycetospora)	7	8	8	15	0	6	5	8	0	0	0	3
OTU_2994 (unc_Betaproteobacteria)	0	5	10	4	0	0	0	0	11	7	13	12
OTU_1711 (unc_Microlunatus)	32	20	0	16	0	0	0	0	0	0	0	0
OTU_2837 (unc_Segetibacter)	4	4	0	49	0	0	0	0	0	3	0	2
OTU_1933 (unc_Bacteria)	0	0	0	3	0	0	0	3	18	16	9	11
OTU_481 (unc_Bacteria)	0	0	0	0	6	0	0	0	0	22	11	19
OTU_6918 (unc_Gp7)	0	0	0	5	2	2	2	7	17	9	7	6
OTU_1592 (unc_Bacteria)	0	0	0	0	0	7	4	3	17	15	6	6
OTU_2476 (unc_Bacteria)	0	0	0	0	20	17	4	4	0	0	0	0
OTU_2019 (unc_Bacteria)	0	0	0	0	8	8	10	8	15	0	2	0
OTU_2594 (unc_Subdivision3_genera_incertae_sedis)	0	0	9	4	0	0	3	2	7	16	8	11
OTU_3790 (unc_Luteolibacter)	0	0	0	0	0	14	8	5	0	12	7	10
OTU_801 (unc_Myxococcales)	0	0	10	0	10	0	0	0	0	0	12	23
OTU_3148 (unc_Chloroflexi)	0	0	0	0	0	13	2	0	22	6	9	5
OTU_1893 (unc_Gp6)	6	3	26	27	0	0	0	0	0	0	0	0
OTU_1746 (unc_Rhizobiales)	0	0	0	17	8	4	7	5	0	6	4	2
OTU_2230 (unc_Bacteria)	15	16	10	24	0	0	0	0	0	0	0	0
OTU_4760 (unc_Bacteria)	0	0	0	0	5	18	8	5	2	5	6	3
OTU_1735 (unc_Thermoactinomycetaceae 1)	8	1	10	6	5	1	1	0	6	6	13	1
OTU_2544 (unc_Gaiella)	11	0	0	0	0	0	0	0	8	13	12	17
OTU_2811 (unc_Deltaproteobacteria)	0	0	0	0	11	10	6	5	3	4	6	5
OTU_1163 (unc_Alphaproteobacteria)	6	6	48	0	0	0	0	0	0	0	0	3
OTU_9303 (unc_Gp16)	0	0	0	0	7	0	27	15	0	0	0	0
OTU_2283 (unc_Burkholderiaceae)	0	0	0	0	6	15	9	6	7	2	4	2
OTU_916 (unc_Gaiella)	0	0	0	0	7	0	11	9	14	5	0	6
OTU_1866 (unc_Deltaproteobacteria)	17	27	13	2	0	0	0	0	4	2	2	0
OTU_7526 (Geminicoccus_roseus)	9	0	2	12	0	0	4	3	2	7	15	5
OTU_1833 (unc_Paenibacillus)	17	13	11	3	0	0	2	3	5	6	1	2
OTU_2605 (unc_Acidimicrobiales)	0	0	0	0	10	3	10	4	7	9	6	2
OTU_1975 (unc_Solirubrobacterales)	0	0	3	0	0	2	0	0	11	13	12	18
OTU_8058 (unc_Gp6)	0	0	0	0	0	0	0	0	13	11	20	15
OTU_3685 (unc_Kofleria)	17	26	10	2	0	0	0	2	0	0	2	7
OTU_2385 (unc_Chthonomonas/Armatimonadetes_gp3)	0	0	0	0	15	9	4	17	0	0	0	0
OTU_1608 (unc_Anaerolineaceae)	0	0	0	0	4	11	18	8	2	7	0	1
OTU_1878 (unc_Gp3)	11	18	6	19	0	0	0	0	0	0	3	7
OTU_4381 (unc_Betaproteobacteria)	11	9	2	4	0	0	5	2	3	4	6	15
OTU_2197 (unc_Planctomycetales)	13	25	15	7	0	0	0	0	0	2	0	4
OTU_2183 (unc_Deltaproteobacteria)	0	0	0	0	4	12	17	16	0	0	0	0
OTU_1611 (unc_Tumebacillus)	15	15	14	10	0	4	0	0	5	0	0	0
OTU_6987 (unc_Iamiaceae)	1	0	0	0	13	9	8	6	2	7	0	2
OTU_134 (unc_Acidimicrobiales)	0	0	0	0	0	18	15	17	0	0	0	0
OTU_735 (unc_Pseudomonas)	0	0	0	0	0	0	52	0	0	0	0	0
OTU_1926 (Sandaracinus_amylolyticus)	0	1	0	1	1	11	2	10	6	8	11	3
OTU_328 (unc_Actinobacteria)	0	0	0	0	6	8	0	0	12	12	6	10
OTU_1375 (unc_WPS-1_genera_incertae_sedis)	18	32	6	4	1	0	1	2	2	0	0	0
OTU_2109 (unc_Chloroflexi)	0	1	0	1	0	0	0	0	3	19	20	15
OTU_911 (Brevundimonas_variabilis)	0	0	0	0	5	12	10	5	7	4	8	0
OTU_3156 (unc_Gp3)	4	0	6	0	0	0	0	0	7	11	10	21
OTU_540 (unc_Firmicutes)	7	0	0	0	0	4	3	6	0	13	3	21
OTU_699 (Novibacillus_thermophilus)	15	26	7	14	0	0	0	0	3	0	0	0
OTU_3514 (unc_Anaerolineae)	0	0	0	0	1	10	8	4	6	11	4	10
OTU_6544 (unc_Planococcaceae)	2	0	0	4	0	2	0	2	9	4	27	7
OTU_1306 (unc_Terrimonas)	0	0	0	0	0	4	0	3	21	4	17	7
OTU_1604 (unc_Gemmatimonadaceae)	0	0	39	20	0	0	0	0	0	0	0	0
OTU_761 (Symbiobacterium_turbinis)	0	0	0	0	0	0	25	10	11	0	3	3
OTU_5781 (unc_Ilumatobacter)	0	0	0	0	7	15	11	8	5	2	0	0
OTU_2576 (Acidibacter_ferrireducens)	27	14	9	7	0	2	1	0	0	1	1	1
OTU_1819 (unc_Litorilinea)	0	0	0	0	2	2	8	18	4	2	12	3
OTU_2061 (unc_Thermoleophilia)	0	0	0	2	7	11	7	9	2	6	3	2
OTU_1315 (unc_Bacteria)	4	4	12	6	0	0	0	0	5	4	14	10
OTU_5803 (unc_Gp7)	0	0	0	0	0	3	0	2	9	22	6	15
OTU_3388 (unc_Nocardioides)	2	4	4	13	0	4	0	3	14	6	5	2
OTU_6127 (unc_Gp6)	0	0	0	0	3	4	5	8	0	7	10	16
OTU_2840 (Sandaracinus_amylolyticus)	0	0	0	2	11	3	5	10	4	3	7	3
OTU_2869 (unc_Bacteria)	40	22	4	0	0	0	0	0	0	0	0	0
OTU_1074 (unc_Firmicutes)	14	3	6	3	0	11	0	7	7	0	0	5
OTU_1323 (Segetibacter_koreensis)	8	9	2	36	0	0	0	0	0	0	2	3
OTU_8903 (unc_Chitinophagaceae)	0	0	0	0	2	8	0	2	19	9	9	5
OTU_7008 (unc_Gp10)	0	0	0	0	11	4	18	10	0	2	0	1
OTU_2154 (unc_Thermoleophilia)	16	23	17	8	0	0	0	0	0	0	0	0
OTU_245 (Nocardioides_halotolerans)	0	21	14	17	0	0	0	0	0	0	0	10
OTU_2943 (unc_Firmicutes)	0	0	0	0	18	3	16	3	0	3	0	1
OTU_2107 (unc_Gemmatimonadaceae)	36	22	3	4	0	0	0	0	0	0	0	0
OTU_1630 (unc_WPS-1_genera_incertae_sedis)	0	0	0	0	2	6	0	2	11	8	16	9
OTU_2212 (unc_Gemmatimonadaceae)	12	19	7	0	4	0	4	0	9	0	0	4
OTU_944 (unc_Brevundimonas)	0	0	0	7	25	5	0	4	0	0	0	0
OTU_3450 (Actinomarinicola_tropica)	0	0	0	0	3	7	9	7	8	9	5	3
OTU_2004 (unc_Cystobacteraceae)	10	4	3	7	3	2	3	0	8	7	2	7
OTU_4177 (unc_Gp6)	2	0	0	0	7	6	8	9	0	7	2	8
OTU_3034 (unc_Saccharibacteria_genera_incertae_sedis)	5	16	0	12	0	2	0	4	0	4	13	3
OTU_5363 (Stenotrophobacter_namibiensis)	0	1	0	1	8	7	13	10	3	0	3	1
OTU_1883 (unc_Bacteria)	0	0	0	5	0	0	0	0	11	9	27	4
OTU_3295 (unc_Thermoplasmata)	0	0	0	0	8	12	3	7	5	9	1	3
OTU_343 (unc_Actinobacteria)	0	0	0	0	0	0	0	0	14	10	13	19
OTU_215 (unc_Rhodococcus)	0	0	0	0	10	21	14	0	0	0	0	0
OTU_3123 (unc_Chitinophagaceae)	3	11	0	5	0	3	0	0	7	7	11	11
OTU_2875 (unc_Bacillariophyta)	1	8	0	1	1	4	2	6	13	17	2	0
OTU_9293 (unc_Actinobacteria)	0	0	0	0	0	3	5	0	11	21	9	6
OTU_673 (unc_Bacteria)	0	0	0	0	8	11	12	14	0	0	0	0
OTU_1848 (unc_Lacrimispora)	3	6	3	6	5	3	7	6	1	4	2	6
OTU_1673 (unc_Alphaproteobacteria)	0	0	8	3	3	0	5	0	0	11	11	13
OTU_1920 (unc_Gp6)	4	2	3	6	0	0	3	2	6	18	9	3
OTU_2691 (unc_Gaiella)	19	16	8	12	0	0	0	0	2	2	2	0
OTU_3313 (unc_Bacteria)	0	0	0	0	6	8	7	8	10	4	2	3
OTU_2194 (unc_Bacteria)	0	0	0	0	8	16	12	8	1	0	0	0
OTU_6648 (unc_Betaproteobacteria)	0	0	0	0	2	3	0	0	11	16	10	12
OTU_2872 (unc_Thermoplasmata)	0	0	0	0	3	23	11	6	0	3	1	0
OTU_1472 (Pseudonocardia_khuvsgulensis)	16	15	4	16	0	0	0	0	0	0	5	4
OTU_1671 (unc_Terrimonas)	0	0	0	0	4	0	0	0	14	12	9	14
OTU_1820 (Actinomadura_alba)	5	2	0	2	2	0	0	0	10	12	12	10
OTU_3616 (Longimicrobium_terrae)	0	0	13	8	0	8	0	5	5	3	6	5
OTU_2788 (unc_Rhodocyclales)	6	6	4	3	10	0	0	3	2	5	5	7
OTU_6226 (unc_Bacillus)	19	5	10	10	0	0	0	0	9	2	3	0
OTU_3214 (Luteolibacter_arcticus)	0	0	0	0	7	3	21	4	3	5	0	4
OTU_4808 (unc_Actinobacteria)	7	5	11	5	0	0	0	4	5	6	7	6
OTU_941 (unc_Micromonosporaceae)	24	9	0	15	0	0	0	0	0	0	0	11
OTU_4748 (unc_Gp6)	9	11	4	3	0	9	9	2	0	3	0	5
OTU_1492 (unc_Bacteria)	21	29	11	2	0	0	0	0	0	0	0	0
OTU_1197 (unc_Caldilineaceae)	15	4	7	22	0	0	0	0	0	0	4	5
OTU_1854 (unc_Acidimicrobiales)	0	0	0	0	0	6	7	6	15	5	3	9
OTU_2090 (unc_Gemmatimonadaceae)	5	3	16	32	0	0	0	0	0	0	0	0
OTU_4607 (unc_Amaricoccus)	0	0	0	0	14	0	16	12	0	0	0	0
OTU_2387 (uncultured_bacterium)	3	4	2	9	2	6	6	4	0	7	0	9
OTU_3822 (unc_Bacteria)	0	0	0	0	2	1	12	12	5	8	4	5
OTU_2000 (unc_Bacteria)	6	48	3	4	0	0	0	0	0	0	2	2
OTU_1944 (unc_Rhodospirillales)	0	0	0	0	3	7	3	13	8	2	9	3
OTU_1680 (unc_Gp4)	0	0	0	0	0	0	0	0	18	10	11	15
OTU_1210 (unc_Bacteria)	0	0	0	18	3	2	5	3	2	7	7	4
OTU_1142 (unc_Thermoleophilia)	0	0	0	0	0	0	0	0	20	13	5	16
OTU_1543 (unc_Gemmatimonadaceae)	0	0	0	6	0	0	0	0	13	14	13	8
OTU_1922 (unc_Gp6)	0	0	0	0	11	10	12	8	0	2	0	0
OTU_2710 (unc_Saccharibacteria_genera_incertae_sedis)	13	14	28	4	0	0	0	0	0	0	0	0
OTU_1500 (unc_Myxococcales)	13	26	18	0	0	0	0	1	0	1	0	2
OTU_4915 (unc_Solirubrobacterales)	7	9	0	9	2	0	8	2	0	3	4	10
OTU_2223 (Flavisolibacter_rigui)	3	0	1	41	0	0	0	0	4	1	2	2
OTU_2345 (unc_Bacteroidetes)	9	0	4	5	0	0	0	0	2	8	12	15
OTU_9186 (unc_Solirubrobacterales)	0	0	0	0	0	5	0	0	18	19	5	6
OTU_7148 (unc_Thermoleophilia)	0	0	0	0	0	0	7	0	6	14	19	7
OTU_3345 (unc_Gp4)	0	0	0	0	5	8	12	19	0	0	0	0
OTU_9722 (unc_Cohnella)	4	4	4	0	3	2	0	0	10	10	11	5
OTU_659 (unc_Bacteria)	0	0	0	0	0	9	4	4	5	10	5	14
OTU_3072 (unc_Gemmatimonas)	1	0	0	2	2	3	4	3	4	3	10	19
OTU_1741 (unc_Bacteria)	0	0	0	0	11	12	8	11	0	0	0	0
OTU_574 (unc_Achromobacter)	0	0	0	4	28	0	0	0	0	0	6	0
OTU_2997 (unc_Betaproteobacteria)	2	2	0	0	7	5	4	5	3	10	2	8
OTU_1609 (unc_Acidobacteria)	0	0	0	0	5	0	3	4	14	6	14	3
OTU_905 (unc_Phenylobacterium)	21	21	10	0	0	0	0	0	0	0	4	4
OTU_9468 (unc_Bacteria)	12	9	6	17	0	2	0	0	4	4	0	2
OTU_2950 (unc_Aliidongia)	12	31	8	6	0	0	0	0	0	0	1	3
OTU_2047 (unc_Verrucomicrobiaceae)	2	0	0	0	5	0	6	8	3	6	10	8
OTU_2159 (unc_Micromonosporaceae)	0	0	0	6	0	0	3	0	4	21	7	12
OTU_9816 (unc_Comamonadaceae)	4	7	1	1	5	13	6	9	0	0	0	1
OTU_1442 (unc_Chloroflexi)	0	0	0	0	4	13	18	9	0	0	0	0
OTU_2086 (unc_Blastocatellaceae)	0	0	0	12	0	4	7	0	3	8	11	6
OTU_1747 (unc_Bacteria)	0	0	0	0	9	11	11	5	5	1	0	1
OTU_1446 (unc_Arboricoccus)	0	0	0	3	0	11	10	5	2	0	11	6
OTU_1103 (unc_Gp6)	0	0	0	0	8	6	13	15	0	0	0	0
OTU_1676 (unc_Bacteria)	18	12	14	13	0	0	0	0	0	0	0	0
OTU_1383 (unc_Acidobacteria)	17	8	12	17	0	0	0	0	0	0	0	2
OTU_1540 (unc_Myxococcales)	5	0	0	0	0	4	2	2	0	19	9	11
OTU_3051 (unc_Rhizobiales)	7	1	0	0	3	11	6	13	1	0	3	1
OTU_2465 (unc_Actinobacteria)	30	12	12	4	0	0	0	0	0	0	0	0
OTU_9837 (unc_Blastococcus)	2	11	6	19	0	3	3	0	3	4	3	0
OTU_1344 (unc_Micromonosporaceae)	17	18	13	10	0	0	0	0	0	0	0	0
OTU_1411 (unc_Bacteria)	15	18	20	5	0	0	0	0	0	0	0	0
OTU_1261 (Compostibacillus_humi)	5	0	0	0	0	0	0	0	10	0	33	4
OTU_1393 (unc_Anaerolineae)	0	0	0	0	0	0	0	0	17	13	8	14
OTU_3924 (unc_Gp6)	0	0	0	0	7	11	3	4	8	7	2	3
OTU_1856 (unc_Gemmatimonadaceae)	0	0	4	7	0	0	0	2	0	10	14	15
OTU_2860 (unc_Ruminiclostridium)	6	0	4	3	0	3	0	0	14	8	8	6
OTU_1191 (unc_Acidimicrobiales)	0	0	0	0	6	5	8	9	3	9	5	0
OTU_1694 (unc_Hymenobacter)	0	0	0	4	0	11	1	1	4	13	6	10
OTU_4647 (unc_Chloroflexi)	0	0	0	0	10	16	7	8	0	0	0	0
OTU_3490 (unc_Nocardioides)	0	0	0	0	5	11	13	12	0	1	1	0
OTU_8057 (unc_Chloroflexi)	0	0	0	0	8	12	12	8	2	0	0	0
OTU_3387 (unc_Gemmatimonadaceae)	0	0	0	0	4	6	9	9	15	0	2	0
OTU_1990 (unc_Alkalihalobacillus)	1	0	0	2	10	13	8	5	0	0	0	3
OTU_2632 (unc_Chthonomonas/Armatimonadetes_gp3)	28	11	9	9	0	0	0	0	0	0	0	0
OTU_1570 (unc_Spartobacteria_genera_incertae_sedis)	0	0	8	7	0	0	0	0	5	11	13	8
OTU_5171 (unc_Myxococcales)	0	3	3	4	0	3	2	8	2	7	7	11
OTU_8559 (unc_Bacteria)	0	0	0	0	4	2	4	2	7	8	9	12
OTU_1889 (unc_Bacteria)	0	0	0	0	3	1	3	0	14	10	14	4
OTU_1585 (unc_WPS-1_genera_incertae_sedis)	0	0	4	0	0	0	0	0	8	22	4	14
OTU_1522 (unc_Ktedonobacterales)	2	2	4	44	0	0	0	0	0	0	0	0
OTU_1568 (unc_Bosea)	0	0	2	0	3	9	10	9	3	6	0	3
OTU_3512 (unc_Gp6)	0	0	3	0	0	0	0	0	0	20	7	22
OTU_578 (Acetivibrio_saccincola)	0	0	0	0	0	0	0	0	45	5	0	0
OTU_2507 (unc_Bacteria)	0	0	0	0	2	19	12	10	0	0	0	0
OTU_6851 (unc_Bacteria)	3	5	1	0	0	0	2	2	25	5	5	3
OTU_4628 (unc_Gp10)	0	0	0	0	7	15	10	5	2	0	2	1
OTU_2179 (unc_Actinobacteria)	0	0	0	0	5	15	6	8	4	4	1	0
OTU_4415 (unc_Verrucomicrobiaceae)	0	0	0	0	0	3	7	7	2	7	11	11
OTU_1539 (unc_Rhodospirillaceae)	12	32	13	2	0	0	0	0	0	0	0	0
OTU_1437 (unc_Gp17)	0	0	0	0	0	9	17	14	0	0	0	4
OTU_1734 (unc_Actinobacteria)	0	0	0	0	2	25	11	4	0	1	0	0
OTU_2802 (unc_Tissierella)	4	0	0	7	0	0	0	0	7	9	17	7
OTU_3488 (unc_Steroidobacter)	1	0	0	1	1	15	4	1	3	9	8	4
OTU_2600 (uncultured_bacterium)	0	0	0	2	0	4	0	4	8	8	11	12
OTU_2506 (unc_Acidobacteria)	1	0	4	32	0	0	0	3	1	2	2	5
OTU_4390 (unc_Saprospirales)	0	0	0	5	6	6	4	6	7	1	7	2
OTU_4409 (unc_Gp17)	0	0	0	0	6	9	8	7	6	6	0	1
OTU_2711 (unc_Gp6)	0	0	0	0	7	10	10	11	3	0	0	0
OTU_1890 (unc_WPS-1_genera_incertae_sedis)	6	14	4	14	0	0	0	0	0	4	8	4
OTU_5299 (unc_Bacteria)	20	6	9	2	5	5	1	0	0	1	0	1
OTU_4366 (unc_Comamonadaceae)	0	0	0	22	0	0	17	0	0	0	0	9
OTU_1566 (unc_Myxococcales)	26	15	8	7	0	0	0	0	0	0	0	0
OTU_2235 (unc_Acidobacteria)	17	33	0	4	0	1	0	2	0	0	1	0
OTU_2896 (unc_Labilithrix)	3	13	4	5	0	2	6	5	2	4	3	4
OTU_2153 (unc_Acetivibrio)	6	0	0	4	0	0	0	0	24	6	6	4
OTU_3976 (unc_Bacteria)	0	0	0	0	8	1	6	7	4	1	8	8
OTU_2792 (unc_Myxococcales)	0	0	0	0	8	3	14	15	0	0	0	0
OTU_10120 (unc_Thermoleophilia)	0	0	0	0	0	0	0	0	12	12	10	16
OTU_9735 (unc_Gp4)	0	0	0	0	9	7	2	12	3	4	0	4
OTU_1342 (unc_Rhodospirillales)	9	11	0	4	0	0	0	0	9	7	6	7
OTU_3599 (unc_Chloroflexi)	0	0	0	0	4	2	5	4	7	13	6	5
OTU_1274 (unc_Ktedonobacterales)	5	5	0	0	0	0	0	0	26	11	0	4
OTU_8707 (unc_Pedomicrobium)	0	0	0	0	0	0	0	16	0	14	0	17
OTU_712 (unc_Bacteria)	0	3	0	0	0	0	0	0	20	8	16	3
OTU_3314 (unc_Sphaerobacteraceae)	0	0	0	0	2	9	4	13	3	7	3	3
OTU_577 (unc_Arenimonas)	0	0	0	0	0	14	11	10	0	4	0	5
OTU_7851 (unc_Bacteria)	2	0	0	0	2	9	2	15	2	5	1	6
OTU_767 (unc_Bacteria)	0	0	0	3	0	10	6	9	10	0	7	0
OTU_2030 (unc_Bacteria)	10	8	7	11	0	0	0	2	6	1	6	1
OTU_7372 (unc_Planococcaceae)	4	7	3	4	3	0	0	0	7	5	8	9
OTU_1952 (unc_Bacteria)	0	0	0	0	0	7	7	6	11	4	6	5
OTU_2696 (unc_Myxococcales)	8	10	13	10	4	0	5	0	0	0	0	0
OTU_1515 (unc_Gp2)	0	0	0	0	0	0	0	0	0	17	11	22
OTU_3308 (unc_Alphaproteobacteria)	0	0	1	1	6	7	11	6	2	1	6	1
OTU_725 (unc_Bacteria)	3	0	0	6	5	0	6	0	6	5	7	8
OTU_2909 (unc_Bacteria)	12	11	12	2	2	1	3	1	5	0	1	1
OTU_1211 (unc_Iamiaceae)	0	0	0	0	8	12	7	8	2	0	0	3
OTU_2071 (unc_Myxococcales)	1	1	0	2	4	8	4	10	4	0	5	4
OTU_845 (unc_Gp6)	0	0	0	0	0	0	0	0	11	7	13	18
OTU_1468 (unc_Chloroflexi)	0	0	0	0	9	6	8	4	3	3	8	0
OTU_3528 (unc_Streptosporangiaceae)	0	0	0	0	2	12	8	8	5	5	2	1
OTU_878 (unc_Gp6)	0	0	0	0	6	0	0	0	6	18	6	10
OTU_2358 (unc_Azospirillaceae)	16	15	13	6	0	0	0	0	0	0	0	4
OTU_3871 (unc_Solirubrobacterales)	0	0	0	3	3	19	4	6	4	1	2	0
OTU_1601 (unc_Pseudoxanthomonas)	0	4	0	0	0	7	12	0	0	7	12	5
OTU_1613 (Paenibacillus_ginsengihumi)	10	34	7	2	0	0	0	0	1	0	3	0
OTU_1846 (unc_Streptomyces)	1	0	7	41	0	0	0	0	0	0	0	0
OTU_4283 (unc_Bacteroidetes)	1	4	0	15	1	3	2	0	10	3	4	5
OTU_5796 (unc_Verrucomicrobiaceae)	0	0	0	0	0	9	15	4	6	0	5	5
OTU_2443 (unc_Xanthomonadales)	0	0	0	0	7	7	12	5	2	8	0	0
OTU_3500 (unc_Myxococcales)	3	15	13	16	0	1	1	0	0	0	1	2
OTU_2816 (unc_Acidimicrobiales)	3	2	3	7	2	5	8	10	2	0	2	0
OTU_3469 (unc_Acidobacteria)	5	3	1	0	6	4	13	4	2	2	3	0
OTU_1360 (unc_Anaerolineae)	0	61	0	0	0	0	0	0	0	0	0	0
OTU_9246 (unc_Acidobacteria)	0	0	0	3	0	1	4	1	13	8	16	1
OTU_678 (unc_Chelatococcus)	0	0	0	0	0	0	4	0	10	20	6	8
OTU_1702 (unc_Bacteria)	8	9	9	9	0	0	0	0	4	5	6	1
OTU_557 (unc_Bacteria)	0	0	0	0	0	5	7	19	5	0	6	0
OTU_8681 (unc_Bacillaceae1)	14	16	11	9	0	0	0	0	2	0	0	1
OTU_3735 (unc_Gp3)	0	0	0	0	1	0	1	1	16	16	9	3
OTU_3237 (unc_Bacteria)	0	0	0	0	3	10	10	11	1	4	0	2
OTU_1984 (unc_Flavisolibacter)	0	0	0	10	0	0	0	0	3	8	11	16
OTU_2295 (unc_Anaerolineae)	17	41	0	0	0	0	0	0	0	0	0	0
OTU_6595 (Longimicrobium_terrae)	0	0	0	0	3	16	13	3	1	3	2	0
OTU_4370 (unc_Gp6)	0	2	0	1	7	4	3	5	8	4	3	5
OTU_1802 (unc_Bacteria)	24	14	3	4	0	0	0	0	0	1	0	7
OTU_1172 (unc_Williamsia)	0	9	0	7	3	0	2	2	6	6	12	0
OTU_4530 (unc_Burkholderiales)	0	1	0	0	4	9	5	7	4	8	2	2
OTU_1880 (unc_Spartobacteria_genera_incertae)	0	0	0	0	2	6	3	0	7	3	7	17
OTU_2050 (unc_Gp4)	0	0	0	0	2	5	7	1	1	16	1	12
OTU_1787 (unc_Actinobacteria)	14	4	3	2	0	0	0	0	3	10	4	10
OTU_2756 (unc_Singulisphaera)	5	15	0	0	3	4	2	3	0	6	5	5
OTU_3745 (unc_Acidobacteria)	0	0	0	1	4	9	4	14	4	1	3	0
OTU_9608 (unc_Gp6)	0	0	0	0	9	6	4	3	9	3	4	2
OTU_2631 (unc_Gaiella)	0	0	0	0	0	0	0	22	20	0	0	0
OTU_1271 (Catenulispora_yoronensis)	34	11	8	0	0	0	0	0	0	0	0	0
OTU_8456 (unc_Thermoleophilia)	0	0	1	1	3	2	8	6	6	8	2	6
OTU_5316 (unc_Rhodospirillales)	17	29	4	5	0	0	0	0	0	0	0	0
OTU_4141 (unc_Polyangiaceae)	0	0	0	0	3	3	11	3	3	5	7	8
OTU_7262 (unc_Chitinophagaceae)	8	14	0	2	0	0	0	0	4	9	4	10
OTU_9882 (unc_Gaiella)	0	0	5	0	0	4	5	0	6	7	6	13
OTU_1825 (unc_Actinomarinicola)	0	0	0	3	0	5	5	2	11	7	7	5
OTU_7897 (unc_Chloroflexi)	0	0	0	0	4	6	6	10	4	6	1	4
OTU_394 (unc_Nannocystis)	0	0	0	0	8	9	0	8	7	0	7	0
OTU_2490 (unc_Armatimonadetes)	22	11	3	12	0	0	0	2	0	1	0	0
OTU_3188 (unc_Oceanobacillus)	5	2	6	8	0	0	2	0	8	17	0	0
OTU_3253 (unc_Bacteria)	12	10	8	7	0	0	3	0	0	2	2	6
OTU_3184 (unc_Gp25)	0	0	0	0	0	0	3	1	14	9	11	8
OTU_4065 (unc_Polyangium)	0	0	0	2	0	8	0	15	5	2	9	1
OTU_5724 (unc_Subdivision3_genera_incertae_sedis)	23	13	10	4	0	0	0	0	0	0	1	1
OTU_2279 (unc_Bacteria)	0	0	0	0	7	10	10	4	2	2	3	1
OTU_565 (Planifilum_composti)	8	13	9	7	0	0	0	6	6	0	0	0
OTU_4091 (unc_Paenibacillaceae1)	3	8	4	0	3	3	0	2	10	5	6	2
OTU_2835 (unc_Phragmitibacter)	0	0	0	0	1	0	8	2	2	11	7	14
OTU_2488 (unc_Bacteria)	0	0	0	0	19	6	7	1	1	0	0	0
OTU_4564 (unc_Kofleria)	3	3	0	0	0	4	3	2	8	7	9	7
OTU_8002 (unc_Singulisphaera)	5	12	8	2	0	0	0	0	3	7	6	7
OTU_2777 (unc_Alphaproteobacteria)	4	3	18	9	0	0	0	1	0	3	7	3
OTU_115 (unc_Aquamicrobium)	0	0	0	0	30	0	0	0	0	0	0	0
OTU_2224 (unc_Bacteria)	3	32	15	3	0	0	0	0	0	1	0	0
OTU_3374 (unc_Betaproteobacteria)	0	0	0	0	2	5	1	6	9	9	10	1
OTU_677 (unc_Gaiella)	0	9	11	0	0	0	0	0	0	9	8	12
OTU_1121 (unc_Thermoleophilia)	3	10	3	4	0	0	0	0	4	6	3	16
OTU_2437 (unc_WPS-1_genera_incertae_sedis)	0	5	3	9	0	3	0	0	2	6	11	8
OTU_1845 (unc_Betaproteobacteria)	0	0	0	0	10	9	5	12	0	0	0	0
OTU_5619 (unc_Kofleria)	6	2	1	2	2	3	7	8	3	4	2	3
OTU_2684 (unc_Gp7)	1	3	36	7	0	0	0	0	0	0	0	1
OTU_5238 (uncultured_Acidobacteria)	0	0	0	0	5	3	10	11	8	2	0	0
OTU_2246 (unc_Paenibacillus)	13	3	7	5	3	3	0	0	0	0	4	8
OTU_2299 (unc_Polyangiaceae)	2	7	0	4	4	4	7	4	3	3	3	2
OTU_2912 (unc_Acidobacteria)	0	0	0	0	6	7	14	8	0	0	0	3
OTU_2391 (unc_Burkholderiales)	10	5	4	14	0	2	3	2	0	3	2	2
OTU_4953 (unc_Methanomassiliicoccus)	0	0	0	0	2	19	10	6	0	2	0	0
OTU_1588 (unc_Paenibacillus)	9	1	3	6	0	0	0	0	10	7	4	7
OTU_3274 (unc_Bacteria)	5	21	3	5	1	1	0	0	3	3	6	2
OTU_3117 (unc_Bacteria)	0	0	0	0	4	10	10	6	8	0	1	0
OTU_2128 (unc_Bacteria)	0	0	3	0	5	4	6	4	2	10	4	3
OTU_1547 (unc_WPS-1_genera_incertae_sedis)	15	15	0	10	0	2	0	4	3	0	0	0
OTU_9835 (unc_Bacteria)	10	2	12	5	1	1	3	2	1	4	2	3
OTU_2032 (unc_Lysobacter)	0	0	0	0	4	11	14	3	2	2	0	3
OTU_1028 (unc_Thermopolyspora)	0	9	0	0	4	0	3	0	24	0	4	0
OTU_2075 (unc_Gemmatimonadaceae)	6	4	6	30	0	0	0	0	0	0	1	0
OTU_3997 (unc_Spartobacteria_genera_incertae_sedis)	5	8	15	2	0	0	0	0	2	3	5	8
OTU_1710 (unc_Rhodospirillales)	20	12	10	7	0	0	0	0	0	0	1	0
OTU_2549 (uncultured_Acidobacteria)	0	0	0	8	2	2	8	8	0	0	8	5
OTU_3263 (unc_Gp20)	0	0	0	0	0	5	5	8	6	6	5	7
OTU_1900 (unc_Gp10)	8	9	6	25	0	0	0	0	0	0	0	0
OTU_5811 (unc_Gp6)	0	0	0	0	7	4	7	8	4	4	3	1
OTU_1587 (unc_Brevibacillus)	22	12	8	8	0	0	0	0	0	0	0	0
OTU_3393 (unc_Bacteria)	0	0	0	4	4	3	3	13	6	1	4	1
OTU_1860 (unc_Actinobacteria)	0	0	0	0	12	4	10	2	3	3	1	1
OTU_1792 (unc_Bacillaceae1)	0	0	0	0	0	0	0	0	38	3	0	3
OTU_2079 (unc_Armatimonas/Armatimonadetes_gp1)	8	10	5	24	0	0	0	0	0	1	0	0
OTU_4150 (unc_Gp6)	0	0	1	1	5	10	9	11	0	0	0	0
OTU_3197 (unc_Gemmatimonadaceae)	0	0	0	0	14	6	3	4	1	1	1	5
OTU_1505 (unc_Acidobacteria)	0	0	0	0	0	0	0	0	15	13	3	14
OTU_4290 (unc_Myxococcales)	10	8	3	13	0	0	2	6	0	2	2	0
OTU_3471 (unc_Kofleria)	0	0	0	0	10	5	1	6	5	6	0	4
OTU_2533 (unc_Subdivision3_genera_incertae_sedis)	8	1	4	5	0	1	0	4	2	8	4	8
OTU_9652 (unc_Solirubrobacterales)	3	0	0	0	4	0	0	0	5	9	6	16
OTU_1682 (unc_Flavisolibacter)	2	5	0	13	0	0	0	0	4	7	8	7
OTU_1874 (unc_Armatimonas/Armatimonadetes_gp1)	7	2	8	29	0	0	0	0	0	0	0	0
OTU_2480 (unc_Ferruginibacter)	0	0	0	0	0	11	7	4	3	5	8	3
OTU_8975 (unc_Gp6)	29	6	11	3	0	0	0	0	0	0	0	0
OTU_2244 (unc_Dyella)	19	12	4	10	0	0	0	0	0	0	4	0
OTU_1639 (unc_Hydrogenispora)	3	3	12	4	3	0	2	0	5	8	4	0
OTU_2321 (unc_Proteobacteria)	6	0	4	2	3	6	3	6	0	4	2	5
OTU_8774 (unc_Gp6)	15	18	9	8	0	0	0	0	0	0	0	0
OTU_2023 (unc_Bacteria)	0	0	0	2	6	8	5	5	5	1	2	4
OTU_1638 (unc_Bacteria)	2	54	0	0	0	0	0	0	0	0	0	0
OTU_1907 (unc_Gp16)	0	0	0	1	5	7	8	7	2	4	3	1
OTU_1471 (Limnochorda_pilosa)	8	8	4	10	0	0	0	14	0	0	0	0
OTU_9603 (unc_Nocardioides)	0	2	2	23	4	0	2	2	0	2	5	0
OTU_1234 (unc_Deltaproteobacteria)	0	0	0	0	4	6	0	0	8	5	10	8
OTU_3798 (unc_Gp5)	0	0	0	0	1	2	3	4	10	3	9	10
OTU_3280 (unc_Bacteria)	0	0	0	0	8	15	3	9	0	0	0	0
OTU_2679 (unc_Solirubrobacterales)	0	0	0	0	7	12	10	5	0	1	1	0
OTU_1696 (uncultured_bacterium)	0	0	0	0	2	5	4	5	6	14	0	5
OTU_4623 (unc_Gemmatimonadetes)	0	0	0	0	3	3	4	5	19	3	3	0
OTU_7471 (unc_Spartobacteria_genera_incertae_sedis)	16	5	3	3	0	0	2	3	4	6	4	0
OTU_2297 (unc_Bacteria)	0	0	0	0	2	5	0	5	11	7	8	3
OTU_3391 (unc_Spartobacteria_genera_incertae_sedis)	4	0	0	2	2	2	6	3	2	11	0	10
OTU_2352 (unc_Actinobacteria)	0	0	0	0	5	7	12	12	0	0	0	0
OTU_2282 (Rhodocytophaga_aerolata)	0	0	0	0	0	3	1	1	10	7	17	4
OTU_3425 (unc_Rhizobiales)	15	20	13	0	0	0	0	0	0	0	2	0
OTU_2188 (unc_Saccharibacteria_genera_incertae_sedis)	16	6	0	13	0	0	6	0	0	0	0	5
OTU_2959 (unc_Gp3)	0	0	0	0	6	7	4	3	13	5	0	0
OTU_3744 (unc_Gemmatimonadaceae)	0	0	2	0	2	1	4	1	5	13	11	3
OTU_1972 (Segetibacter_aerophilus)	7	3	3	21	0	0	0	0	5	0	2	4
OTU_3888 (unc_Sporomusa)	4	1	1	25	0	2	5	2	0	3	0	0
OTU_2884 (unc_Gp15)	10	5	19	2	0	0	2	0	1	0	3	4
OTU_2535 (unc_Bacteria)	15	22	10	3	0	0	0	0	0	0	0	0
OTU_2248 (unc_Nitrospira)	8	0	0	2	0	0	1	1	9	8	9	6
OTU_2081 (unc_Myxococcales)	8	31	4	8	0	0	0	0	0	0	0	0
OTU_3989 (unc_WPS-1_genera_incertae_sedis)	0	0	0	0	4	6	4	9	1	5	5	4
OTU_1999 (unc_Clostridia)	3	0	0	0	0	2	4	12	15	2	2	0
OTU_2763 (unc_Bacteria)	0	0	0	0	3	10	6	7	1	6	4	1
OTU_1401 (unc_Parachlamydiaceae)	0	55	0	0	0	0	0	0	0	0	0	0
OTU_2787 (unc_Bacteria)	2	0	0	0	0	5	2	1	15	4	5	8
OTU_1062 (unc_Proteiniborus)	0	0	0	0	0	0	4	0	34	4	0	0
OTU_1813 (unc_Rhizobiales)	0	0	0	0	0	11	14	7	6	0	0	0
OTU_3315 (unc_Acidobacteria)	0	0	0	0	3	5	11	6	5	3	2	3
OTU_7072 (unc_Polyangiaceae)	6	13	8	4	4	3	0	0	0	3	3	0
OTU_3223 (unc_Gp10)	0	0	0	0	1	8	10	3	8	3	6	0
OTU_3655 (unc_Noviherbaspirillum)	16	8	4	15	0	0	1	1	1	0	0	0
OTU_2674 (unc_Latescibacteria_genera_incertae_sedis)	0	0	1	0	0	3	4	1	6	9	5	13
OTU_2836 (unc_Acetobacteraceae)	0	0	0	0	6	11	12	6	0	0	0	0
OTU_4690 (unc_Paenibacillus)	1	10	5	5	2	0	1	1	2	4	4	9
OTU_3448 (unc_Gp3)	0	0	0	0	8	4	8	4	4	5	3	0
OTU_4168 (unc_Sporomusa)	5	0	3	1	18	1	3	0	0	0	2	0
OTU_4663 (unc_Kofleria)	15	26	9	0	0	0	0	0	0	0	0	0
OTU_1943 (unc_Saccharibacteria_genera_incertae_sedis)	14	11	17	5	0	0	0	0	0	0	0	0
OTU_3379 (unc_Subdivision3_genera_incertae_sedis)	13	18	6	11	0	0	0	0	0	0	0	0
OTU_6491 (unc_Bacteria)	0	0	0	0	0	4	2	7	10	3	11	3
OTU_3613 (Roseisolibacter_agri)	0	0	0	8	1	3	5	5	1	5	8	4
OTU_2470 (unc_Gp7)	11	4	15	15	0	0	0	0	0	0	0	0
OTU_1665 (unc_Bacteria)	11	10	9	7	0	0	0	0	0	0	2	7
OTU_2565 (unc_BRC1_genera_incertae_sedis)	0	0	0	0	7	3	3	3	8	4	4	5
OTU_8758 (unc_Gemmatimonadaceae)	0	0	0	0	5	4	15	10	0	1	0	0
OTU_4361 (unc_Bacteria)	0	0	0	0	8	1	13	10	1	1	0	0
OTU_2014 (unc_Subdivision3_genera_incertae_sedis)	0	0	0	0	0	2	0	2	4	15	7	12
OTU_2377 (unc_Solirubrobacterales)	16	9	10	9	0	0	0	0	0	0	1	1
OTU_7672 (unc_Bacteria)	6	3	0	13	0	5	4	5	0	2	3	0
OTU_1000 (unc_Iamiaceae)	4	5	6	9	0	0	0	0	0	7	9	4
OTU_2114 (unc_Myxococcales)	6	0	0	0	4	4	4	3	0	10	6	2
OTU_3789 (unc_Bacteria)	0	0	0	0	14	7	0	0	10	0	0	2
OTU_1684 (unc_Rhizobiales)	0	0	0	4	9	4	3	5	3	1	4	2
OTU_2176 (unc_Bacteria)	0	0	0	0	10	10	10	3	0	0	0	0
OTU_2511 (unc_Sphingoaurantiacus)	0	0	0	1	3	9	3	7	7	5	1	1
OTU_8775 (Acidibacter_ferrireducens)	13	23	7	3	0	2	0	0	0	0	0	0
OTU_1800 (unc_Bacteria)	10	11	24	1	0	0	0	0	0	0	0	0
OTU_2689 (unc_Gp3)	0	0	0	0	0	0	3	2	8	5	14	9
OTU_1097 (unc_Gp6)	0	0	0	7	0	0	0	0	0	4	16	15
OTU_2347 (unc_Litorilinea)	0	0	0	0	3	17	6	2	4	1	1	2
OTU_2989 (unc_Chitinophagaceae)	1	12	1	3	0	5	0	1	16	2	2	0
OTU_3865 (unc_Lysobacter)	0	0	0	3	0	3	4	0	4	14	13	0
OTU_2192 (unc_Myxococcales)	5	0	0	6	0	0	0	0	13	5	10	3
OTU_1497 (unc_Saccharibacteria_genera_incertae_sedis)	10	23	12	1	0	0	0	0	0	1	1	0
OTU_1067 (Nitrososphaera_viennensis)	0	0	0	15	0	0	0	0	4	9	3	11
OTU_3659 (unc_Bacteria)	0	0	15	23	0	1	0	0	1	0	2	0
OTU_2582 (unc_Gp7)	0	0	0	0	3	2	14	3	10	1	0	4
OTU_1474 (unc_Actinobacteria)	0	0	0	0	4	6	6	3	0	4	8	6
OTU_8599 (unc_Spartobacteria_genera_incertae_sedis)	0	4	20	19	0	0	0	0	0	0	0	0
OTU_846 (unc_Betaproteobacteria)	18	8	7	8	0	0	0	0	0	0	4	0
OTU_3578 (unc_Myxococcales)	2	0	0	6	1	3	4	1	2	10	8	3
OTU_1617 (unc_Solirubrobacterales)	0	0	0	0	0	2	0	0	12	9	7	11
OTU_2278 (unc_Bacteria)	0	0	0	0	6	1	6	9	10	3	0	0
OTU_1188 (unc_Parasegetibacter)	0	0	0	0	0	0	0	0	2	20	6	14
OTU_1560 (unc_Chitinophagaceae)	1	3	0	6	0	1	1	3	5	3	9	9
OTU_1531 (unc_Gp6)	0	0	23	16	0	0	0	0	0	0	0	3
OTU_4682 (unc_Micromonosporaceae)	10	12	12	8	2	0	0	0	0	0	0	0
OTU_2703 (unc_Iamia)	0	0	0	2	3	7	2	6	3	9	3	2
OTU_2524 (unc_Chloroflexales)	0	0	0	0	6	5	13	6	2	0	2	0
OTU_3221 (unc_Bacteria)	0	0	0	0	4	7	10	7	3	4	0	0
OTU_1112 (unc_Gemmatimonadaceae)	29	4	0	0	0	0	0	0	0	5	0	7
OTU_3167 (unc_Rhodobacteraceae)	0	0	0	0	7	8	10	7	1	0	0	0
OTU_3196 (unc_Gp7)	0	0	0	0	2	7	12	5	7	3	0	0
OTU_2942 (unc_Bacteria)	0	0	0	0	9	7	7	9	0	0	0	0
OTU_743 (unc_Gemmatimonas)	0	0	0	6	5	7	5	11	0	0	0	0
OTU_3358 (Nocardia_endophytica)	5	4	3	10	3	3	0	0	7	2	2	1
OTU_255 (unc_Rhodococcus)	18	14	0	0	0	0	0	0	0	14	0	0
OTU_1840 (unc_Alphaproteobacteria)	0	0	0	0	6	13	9	5	0	0	0	0
OTU_1264 (unc_Actinobacteria)	0	0	4	3	0	0	0	0	8	11	7	8
OTU_4893 (unc_Dongia)	24	4	4	9	0	0	0	0	0	0	0	3
OTU_5551 (unc_Rhodobacteraceae)	0	0	0	0	8	10	5	9	0	0	0	0
OTU_2070 (unc_Tissierellaceae)	3	0	2	4	0	0	1	0	3	8	13	7
OTU_1918 (unc_Sphaerobacter)	16	12	8	5	0	0	0	0	0	0	0	4
OTU_950 (unc_Bacteria)	0	0	11	24	0	0	0	0	0	0	0	6
OTU_1719 (unc_Reyranella)	18	27	1	2	0	0	0	0	0	0	0	0
OTU_1979 (unc_Gp17)	0	0	0	0	0	1	6	3	11	12	5	1
OTU_2390 (unc_Bacteria)	0	0	0	0	1	11	8	5	2	2	4	3
OTU_3182 (unc_Gaiella)	0	0	0	2	0	0	0	3	10	12	5	8
OTU_1862 (unc_Bacteria)	0	0	0	1	0	11	4	0	6	6	8	2
OTU_2025 (unc_Saccharibacteria_genera_incertae_sedis)	4	0	37	1	0	0	0	0	0	0	0	0
OTU_4729 (unc_Deltaproteobacteria)	0	0	6	12	0	5	2	2	3	3	6	0
OTU_5831 (unc_Paenibacillus)	4	3	11	18	0	3	0	1	0	0	1	0
OTU_6400 (unc_Bacteria)	0	0	0	0	6	8	4	1	4	4	3	5
OTU_3603 (unc_Bacteria)	15	24	6	2	0	0	0	0	0	0	0	0
OTU_2234 (unc_Myxococcales)	0	0	0	0	26	0	0	0	0	0	0	0
OTU_2801 (Paenibacillus_oryzae)	2	4	5	4	0	19	0	1	0	1	1	1
OTU_2219 (unc_Gemmatimonadaceae)	0	1	16	14	0	0	0	0	0	0	3	7
OTU_3267 (unc_Caulobacteraceae)	0	0	0	0	2	12	3	3	2	4	6	4
OTU_2199 (unc_Betaproteobacteria)	13	10	14	3	0	0	0	0	0	1	0	3
OTU_2789 (unc_WPS-1_genera_incertae_sedis)	14	16	7	8	0	0	0	0	0	0	0	0
OTU_1254 (unc_Gp17)	0	0	0	0	0	0	0	0	11	9	12	8
OTU_2645 (unc_Gemmatimonadaceae)	0	0	0	1	9	2	7	4	2	4	3	1
OTU_8580 (unc_Lachnospiraceae)	4	5	3	3	0	0	2	0	10	2	6	6
OTU_2450 (unc_Bacteria)	0	0	0	0	11	5	6	6	1	2	0	0
OTU_4323 (unc_Betaproteobacteria)	8	10	3	11	0	0	0	0	0	5	4	2
OTU_4495 (Kofleria_flava)	0	0	0	0	11	3	5	3	3	4	2	1
OTU_9997 (unc_Bacteria)	0	0	0	0	8	1	1	4	12	4	4	0
OTU_4205 (unc_Novosphingobium)	5	13	2	3	0	4	1	0	7	0	7	0
OTU_3384 (unc_Solirubrobacterales)	8	2	6	1	5	5	3	1	1	1	1	3
OTU_4042 (unc_Bacteria)	0	0	0	0	3	0	5	12	6	7	0	2
OTU_3542 (unc_Gp10)	0	0	0	0	0	15	10	9	0	0	0	0
OTU_989 (unc_Firmicutes)	0	3	0	0	0	0	4	0	29	0	0	3
OTU_2241 (unc_Betaproteobacteria)	0	0	0	0	2	6	4	5	6	6	2	5
OTU_2762 (unc_Gp6)	17	12	4	4	0	0	0	0	0	0	0	7
OTU_4559 (unc_Gp25)	0	0	0	0	0	0	0	1	23	7	3	5
OTU_7699 (unc_Polaromonas)	0	3	0	3	0	8	6	6	0	5	1	5
OTU_2002 (unc_Spartobacteria_genera_incertae_sedis)	0	0	6	0	0	0	0	0	5	12	7	10
OTU_9135 (unc_Spartobacteria_genera_incertae_sedis)	0	0	0	0	0	0	0	4	7	15	3	10
OTU_8978 (unc_Myxococcales)	4	0	0	0	0	6	2	8	2	6	2	7
OTU_2453 (unc_Deltaproteobacteria)	0	0	0	0	0	10	4	6	4	4	0	8
OTU_2051 (unc_Actinobacteria)	0	0	0	0	0	6	4	8	8	5	5	0
OTU_437 (unc_Bacteria)	0	0	0	0	0	13	0	0	8	8	8	0
OTU_2038 (unc_Gemmatimonadaceae)	6	5	0	7	7	6	0	0	0	0	0	5
OTU_3234 (unc_Polyangiaceae)	0	0	0	2	8	1	6	4	1	7	3	1
OTU_3289 (unc_Gp6)	0	0	0	0	6	10	8	4	4	0	0	0
OTU_2036 (unc_Bacteria)	4	10	15	9	0	0	0	0	0	0	0	4
OTU_2862 (unc_Spartobacteria_genera_incertae_sedis)	0	0	0	0	5	0	2	0	8	9	6	6
OTU_2805 (unc_Chloroflexi)	0	0	0	0	0	0	0	0	2	6	19	12
OTU_2034 (unc_Gaiella)	13	12	11	7	0	0	0	0	0	0	0	0
OTU_4261 (unc_Saccharibacteria_genera_incertae_sedis)	6	10	14	10	0	0	0	0	0	0	0	2
OTU_2775 (unc_Gp2)	6	31	8	0	0	1	0	0	0	0	0	0
OTU_2456 (unc_Actinobacteria)	0	0	0	0	1	0	2	3	14	6	8	3
OTU_2798 (unc_Gaiella)	13	9	5	10	0	0	0	0	1	3	0	1
OTU_4797 (unc_Chloroflexi)	0	0	0	0	6	6	9	10	0	0	0	0
OTU_3605 (unc_Lysobacter)	0	0	0	25	0	2	2	0	2	0	1	6
OTU_3661 (unc_Rhizobiales)	4	2	3	0	0	3	1	4	6	7	7	1
OTU_8328 (unc_Rhodopila)	10	6	7	5	0	0	0	0	3	2	3	5
OTU_2542 (unc_Bacteria)	0	0	0	0	0	6	4	9	5	4	4	3
OTU_2658 (unc_Spartobacteria_genera_incertae_sedis)	0	0	9	0	0	0	0	0	4	10	7	9
OTU_2639 (unc_Paenibacillus)	12	7	3	4	0	0	2	0	4	7	0	2
OTU_2934 (unc_Solirubrobacterales)	11	9	19	2	0	0	0	0	0	1	0	0
OTU_3568 (unc_Solirubrobacterales)	0	0	4	0	3	0	0	0	5	9	8	8
OTU_3381 (unc_Chloroflexi)	0	0	0	0	6	4	13	8	0	0	0	0
OTU_2157 (unc_Bacteria)	0	0	0	6	0	4	2	2	3	6	9	5
OTU_2346 (unc_Gemmatimonas)	14	20	4	5	0	0	0	0	0	1	0	0
OTU_1567 (unc_Alkaliphilus)	0	0	0	5	0	0	0	0	16	8	9	0
OTU_3297 (unc_Bacteria)	0	0	2	10	0	3	2	2	5	0	7	6
OTU_4901 (unc_Noviherbaspirillum)	4	0	0	6	4	0	0	3	4	10	2	3
[truncated: 4,867 more rows]

## Sheet: Genera
	Karasuk 1	Karasuk 2	Karasuk 3	Karasuk 4	Novosibirsk 1	Novosibirsk 2	Novosibirsk 3	Novosibirsk 4	Toguchin 1	Toguchin 2	Toguchin 3	Toguchin 4
Gp6	4804	6029	6191	5075	5806	6801	7571	6713	11562	12290	11764	11709
Gp16	7398	6781	6546	4350	9172	11045	10897	9794	3536	3845	4291	3864
unc_Bacteria	6094	6469	7841	6498	3430	4744	4459	4560	4998	4712	4741	4947
unc_Actinobacteria	2155	1937	1923	1551	5466	7262	8695	7954	4357	4958	3847	4744
Gaiella	2791	4127	3391	2214	1062	1385	1857	1764	4994	5331	3834	5127
unc_Solirubrobacterales	2656	3163	2456	1839	977	1404	1279	1057	1841	1973	1733	1798
Gp4	172	269	1738	2765	750	1169	809	1217	1842	2095	1683	2130
unc_Rhizobiales	1197	1766	1575	730	332	781	828	721	1918	2136	1904	2271
Pseudarthrobacter	1496	782	441	1493	1153	1896	2024	2350	555	578	667	573
unc_Gemmatimonadaceae	3006	2782	2296	2383	319	359	364	396	748	816	1144	1039
unc_Acidobacteria	1134	1074	1471	1550	648	841	931	986	962	693	736	655
Streptomyces	2210	2150	1189	1691	387	756	560	498	507	502	898	659
unc_Betaproteobacteria	1168	1290	1197	738	423	567	606	565	794	827	918	961
unc_Gemmatimonadetes	777	1047	940	839	461	606	653	613	822	610	757	665
unc_Chloroflexi	814	1375	914	1254	411	520	573	521	586	424	592	531
Gp1	1542	3385	2793	1203	14	26	2	17	55	102	82	131
Sphingomonas	1346	1252	833	1311	283	657	336	267	457	494	493	502
unc_Thermoleophilia	800	2305	1024	722	212	270	264	216	603	675	536	709
Bacillus	1112	900	860	1083	222	123	114	66	734	826	1165	883
Blastococcus	636	469	376	873	506	881	789	702	370	490	459	491
Microlunatus	503	50	32	59	9	15	53	38	1260	1742	1357	2001
Gp3	1199	1632	788	1080	125	169	196	242	452	444	478	463
Rubrobacter	198	103	336	482	482	661	740	446	697	713	705	622
Bradyrhizobium	1050	2155	1201	641	0	0	0	0	326	627	453	723
Paenibacillus	867	725	627	664	192	348	275	255	553	509	447	487
unc_Micromonosporaceae	1173	1142	1062	833	134	191	172	196	218	303	279	300
Gp10	2318	2011	41	112	243	277	310	252	133	96	133	72
Gp17	65	55	197	80	497	804	836	853	369	435	335	372
unc_Rhodospirillales	1014	1350	1028	621	205	215	219	223	169	243	219	245
unc_Acidimicrobiales	258	383	321	229	414	523	570	468	464	519	472	527
Nocardioides	547	754	396	579	394	700	600	520	138	123	171	83
Pseudonocardia	817	799	722	787	28	168	179	44	315	417	473	468
Solirubrobacter	581	544	513	672	280	306	263	181	347	386	331	347
Spartobacteria_genera_incertae_sedis	206	303	601	248	45	38	68	52	482	904	794	1116
Nonomuraea	1121	1202	839	797	0	0	68	0	195	201	188	120
unc_Myxococcales	356	442	288	402	206	195	275	244	302	491	442	453
Sporosarcina	476	282	663	692	0	0	0	0	637	530	491	322
unc_Hyphomicrobiaceae	150	176	335	446	191	234	265	222	519	386	531	321
unc_Iamiaceae	194	217	238	165	204	407	379	378	305	337	253	246
unc_Anaerolineaceae	0	66	78	47	282	336	458	450	311	379	379	394
unc_Sphaerobacteraceae	302	451	273	472	100	264	273	223	284	242	309	230
Gp7	204	47	227	69	144	268	327	343	475	367	302	273
Mycobacterium	391	336	180	314	30	44	52	57	311	506	541	545
Acidibacter	578	458	511	637	36	40	38	53	212	204	257	231
Stenotrophobacter	291	547	263	376	142	203	119	148	220	205	226	211
Actinoplanes	472	643	334	464	0	108	127	118	200	220	204	189
Peribacillus	251	150	178	154	152	141	127	101	406	379	429	366
Microvirga	127	37	42	347	159	218	246	221	281	381	320	314
Nitrospira	92	80	101	209	156	291	280	313	301	271	280	286
WPS-1_genera_incertae_sedis	432	601	200	377	64	110	27	88	170	280	325	292
unc_Ilumatobacteraceae	3	10	0	10	273	313	379	286	335	368	297	235
unc_Anaerolineae	206	398	165	86	249	255	272	252	145	163	155	108
Marmoricola	300	288	135	428	200	310	276	191	45	78	122	84
Gp25	1	0	32	48	70	118	93	95	525	580	423	494
unc_Bradyrhizobiaceae	285	431	311	229	9	135	117	120	264	214	236	218
unc_Gammaproteobacteria	72	89	120	65	133	200	196	171	431	311	322	223
Kofleria	438	265	311	288	93	80	129	97	99	183	251	220
Gp5	103	87	226	148	74	110	152	97	258	339	355	369
unc_Chitinophagaceae	261	591	219	251	36	66	12	25	266	241	224	292
Streptosporangium	431	470	318	298	0	0	89	120	179	182	200	149
Tumebacillus	301	440	498	332	50	96	139	112	63	120	31	146
unc_Intrasporangiaceae	248	184	128	266	116	206	262	195	0	175	186	204
Neobacillus	258	186	229	216	0	0	0	0	303	338	390	399
unc_Alphaproteobacteria	323	342	354	164	76	62	77	78	113	118	188	178
Povalibacter	0	0	101	371	42	65	69	71	264	260	286	272
Skermanella	0	0	1	219	91	149	204	266	137	154	208	228
Litorilinea	41	47	38	111	93	180	187	309	140	126	185	157
Subdivision3_genera_incertae_sedis	238	216	290	155	44	67	75	48	76	171	139	231
Reyranella	287	502	327	142	26	21	25	18	91	107	69	120
Kribbella	180	225	111	208	0	0	0	0	204	193	307	223
unc_Acetobacteraceae	528	590	250	136	17	26	26	16	12	26	17	33
unc_Nocardioidaceae	356	309	183	196	56	50	74	39	60	63	78	81
Saccharibacteria_genera_incertae_sedis	370	360	278	226	36	41	45	38	34	52	45	40
unc_Proteobacteria	110	198	140	119	80	114	101	119	97	120	134	102
Romboutsia	120	501	250	195	0	0	0	0	130	221	123	62
Micromonospora	451	476	151	145	0	0	0	0	99	131	103	55
unc_Cystobacteraceae	138	249	75	150	89	119	140	83	79	91	98	97
Gemmatimonas	252	279	192	238	46	41	43	34	64	66	96	95
unc_Deltaproteobacteria	51	107	70	33	77	132	132	119	109	177	119	154
unc_Comamonadaceae	238	160	103	206	44	85	96	69	54	102	79	85
Clostridiumsensustricto	36	80	24	57	13	12	21	15	122	225	386	334
Thermanaerothrix	0	0	0	3	131	144	222	196	197	68	118	35
Actinomarinicola	75	113	124	101	72	120	125	86	101	86	84	74
unc_Firmicutes	68	47	45	24	43	72	159	133	316	106	57	67
Latescibacteria_genera_incertae_sedis	6	4	26	29	111	121	168	170	96	135	68	139
Asanoa	281	155	285	258	0	28	0	26	41	63	67	29
Desertimonas	26	32	31	29	62	73	98	77	182	172	151	133
Massilia	93	70	11	594	0	36	43	5	59	103	67	58
Turicibacter	159	336	74	87	0	1	0	0	142	165	138	106
unc_Peptostreptococcaceae	117	341	194	158	0	0	0	0	99	148	88	61
Geodermatophilus	261	303	173	288	3	0	0	2	0	53	40	62
Labilithrix	100	148	204	213	37	34	57	54	56	58	74	51
unc_Geminicoccaceae	20	8	5	0	88	129	143	131	111	104	92	105
unc_Sphingomonadaceae	37	41	27	84	66	148	98	92	126	84	74	85
Devosia	145	106	35	41	113	76	72	66	69	62	124	52
Actinomadura	355	228	154	182	2	0	0	0	32	12	99	32
unc_Polyangiaceae	40	60	32	57	54	71	111	78	46	114	133	139
Aeromicrobium	47	30	0	39	143	147	135	86	54	54	71	53
Psychrobacillus	140	180	116	129	29	0	0	0	139	95	97	93
Mesorhizobium	118	113	65	58	0	53	75	56	104	85	101	85
unc_Bacillaceae1	58	42	71	40	39	50	48	28	175	66	149	110
Lysobacter	32	17	33	105	46	96	111	53	45	137	73	78
Hyphomicrobium	58	76	66	68	75	86	110	73	67	72	54	3
Cohnella	151	107	107	105	36	42	32	25	80	58	62	67
Actinoallomurus	342	315	137	104	0	0	0	0	28	0	27	0
Lentzea	54	0	0	16	111	217	60	27	0	45	162	49
Microbispora	159	364	86	101	0	0	22	0	48	43	48	49
Brevibacillus	132	465	78	56	3	6	12	0	81	15	19	48
unc_Isosphaeraceae	184	233	120	61	21	38	31	19	20	34	41	49
unc_Oxalobacteraceae	127	80	31	176	22	62	53	76	32	15	37	46
Arboricoccus	33	51	20	30	39	99	117	65	55	73	64	66
Flavisolibacter	59	77	28	436	0	22	1	3	32	46	36	37
Pedomicrobium	30	0	80	65	0	36	30	16	89	140	123	128
Gp11	0	0	0	0	47	33	70	52	147	152	100	88
Roseisolibacter	27	18	15	73	51	82	82	72	84	52	61	60
unc_Caldilineaceae	15	4	7	33	47	85	122	166	29	30	53	55
unc_Paenibacillaceae1	144	100	86	125	18	16	6	12	135	32	38	25
Vicinamibacter	0	0	0	0	103	107	96	69	64	69	38	60
Nitrososphaera	84	85	52	115	3	6	4	8	40	98	119	117
unc_Bacteroidetes	70	65	33	82	30	27	20	27	65	77	79	100
Lysinibacillus	55	41	45	33	16	20	0	0	117	174	111	69
unc_Rhodospirillaceae	30	79	68	43	12	17	30	42	79	98	93	72
Shimazuella	104	168	118	115	0	11	0	2	65	39	38	28
Ilumatobacter	0	0	0	34	93	81	84	81	47	60	31	37
Alkalihalobacillus	249	66	54	112	18	13	17	11	21	23	31	44
unc_Jiangellaceae	0	0	0	0	82	80	92	74	66	47	42	56
Luteitalea	0	0	0	0	82	75	147	81	29	52	25	39
unc_Steroidobacteraceae	24	33	43	5	1	37	64	53	94	92	84	67
unc_Burkholderiales	21	37	25	45	37	65	68	57	56	43	71	43
Chthonomonas/Armatimonadetes	110	72	80	92	11	42	24	32	23	41	24	54
Phyllobacterium	0	0	0	0	64	35	36	46	67	91	87	91
Thermoactinomyces	126	333	64	76	1	0	1	1	5	5	17	13
Occallatibacter	263	217	115	19	0	0	0	0	0	0	0	0
BRC1_genera_incertae_sedis	79	123	38	74	17	31	27	32	28	36	24	36
unc_Enterobacteriaceae	0	0	0	0	321	0	25	0	0	0	0	0
Phenylobacterium	85	129	73	88	16	19	16	2	14	33	29	30
unc_Pseudonocardiaceae	96	198	78	90	4	4	1	1	1	20	23	40
unc_Blastocatellaceae	16	16	2	65	16	31	27	31	62	80	74	63
Roseomonas	68	46	36	95	37	54	48	52	1	17	11	4
unc_Streptomycetaceae	168	264	43	92	0	0	0	0	0	0	0	0
Parviterribacter	76	67	50	74	33	38	26	26	23	23	24	21
Hydrogenispora	43	20	41	27	34	17	25	48	46	73	56	32
Kallotenue	89	52	35	46	33	27	27	45	11	43	22	38
Longimicrobium	4	2	16	30	29	93	61	80	23	28	32	19
unc_Azospirillaceae	160	219	81	44	5	3	1	6	0	0	6	5
Steroidobacter	11	9	13	36	17	34	27	23	70	73	58	60
unc_Micrococcaceae	25	17	0	39	44	46	40	67	22	17	54	27
Gp18	0	0	0	0	41	53	50	40	61	59	40	43
unc_Chromatiales	0	1	1	10	25	43	57	43	74	50	51	29
unc_Bacillales	22	34	11	21	22	18	21	22	181	12	13	19
Adhaeribacter	0	2	0	59	22	52	17	17	57	68	56	37
Aminobacter	16	59	0	23	97	19	32	18	28	25	28	13
Virgisporangium	19	15	37	82	18	26	20	20	44	26	46	28
Flavitalea	19	31	20	55	0	18	1	1	64	67	70	55
Baekduia	57	111	25	15	4	48	42	42	12	10	12	13
unc_Geodermatophilaceae	116	108	65	122	0	8	0	0	0	0	0	0
Pilimelia	101	82	65	37	0	0	0	14	47	31	17	16
unc_Clostridiales	32	14	32	15	11	14	12	28	126	38	21	26
Armatimonadetes_gp4	15	48	69	19	17	38	55	29	29	9	16	14
Dactylosporangium	111	66	64	76	0	0	0	15	0	19	25	20
unc_Rhodobacteraceae	0	0	0	0	59	96	62	56	6	1	3	2
unc_Streptosporangiales	123	225	37	6	0	0	0	0	0	14	0	0
Chthonomonas/Armatimonadetes_gp3	89	92	44	43	21	15	7	18	0	9	3	6
unc_Planococcaceae	25	21	14	17	13	2	4	7	65	28	94	40
unc_Micrococcales	0	0	3	39	77	31	47	35	1	3	34	0
Terrimicrobium	0	2	2	1	2	0	33	30	47	83	40	75
Aquicella	45	41	155	24	8	1	1	5	6	6	19	23
Conexibacter	41	44	19	35	54	30	12	18	0	14	9	13
Hymenobacter	3	3	0	166	6	27	12	7	14	32	13	21
Solibacillus	0	0	20	15	0	0	0	0	90	64	95	28
Sphaerobacter	115	131	43	29	0	0	4	5	0	3	5	10
Gp2	29	78	86	21	5	2	7	6	4	30	23	32
Nocardia	29	42	36	26	15	7	9	15	30	23	50	17
Thermoflavimicrobium	0	0	0	0	0	0	0	0	265	11	0	9
unc_Planctomycetales	30	95	29	12	28	31	8	6	17	15	10	11
Ohtaekwangia	6	2	0	7	18	10	6	13	74	50	60	30
unc_Clostridia	51	20	12	18	7	13	22	29	73	18	10	7
unc_Verrucomicrobiaceae	13	4	4	0	23	17	49	32	25	23	42	28
Aggregatilinea	35	23	24	36	5	10	13	21	34	37	24	22
Arenimonas	0	0	0	0	20	41	50	45	29	29	16	21
Altererythrobacter	13	15	12	108	11	14	16	19	0	25	13	17
Ramlibacter	43	38	19	76	11	5	10	5	9	20	13	26
Nannocystis	27	9	0	23	29	20	26	18	26	24	21	23
Arenimicrobium	0	0	0	24	6	39	2	19	45	50	27	41
Symbiobacterium	7	28	5	1	2	18	36	30	102	1	9	13
Modestobacter	25	34	19	64	16	32	25	20	0	0	0	11
Nitrosospira	22	29	0	33	17	0	25	21	0	18	36	43
unc_Lachnospiraceae	11	10	13	12	3	1	6	4	75	57	36	20
Rhizomicrobium	78	124	68	11	0	0	0	0	0	0	0	1
Beijerinckia	39	38	23	119	8	11	7	0	6	0	0	0
unc_Erythrobacteraceae	44	35	38	43	5	16	13	24	0	11	9	7
Rubellimicrobium	8	3	0	4	29	39	42	50	8	5	15	3
unc_Opitutaceae	16	48	35	10	4	11	13	13	18	36	22	22
Sorangium	22	57	34	47	0	7	20	18	14	8	16	6
Cystobacter	21	28	11	94	0	16	0	9	0	4	35	24
Amaricoccus	9	0	0	0	115	0	18	12	0	4	7	5
unc_Propionibacteriales	0	0	0	0	0	0	0	0	43	65	70	58
Chryseolinea	2	1	1	0	15	23	8	11	30	49	49	30
Sandaracinus	4	10	1	14	21	24	21	29	29	22	24	12
Planifilum	34	107	22	35	5	0	3	13	26	0	6	0
Rhizobium	0	0	0	33	0	25	33	21	23	37	19	20
Jatrophihabitans	66	91	47	33	0	0	0	0	0	0	0	13
unc_Rhodanobacteraceae	41	35	7	10	18	31	20	14	10	18	3	2
unc_Thermoplasmata	0	0	0	0	23	53	21	21	10	24	17	20
Daejeonella	0	2	0	7	13	45	23	28	18	18	15	21
Novosphingobium	16	34	2	8	50	22	15	5	7	11	17	0
Edaphobacter	100	112	18	11	0	0	0	0	0	3	0	1
unc_Roseiflexaceae	0	0	0	0	21	51	57	43	0	0	1	1
unc_Xanthomonadales	9	15	24	31	20	13	26	30	12	8	0	4
Parageobacillus	0	10	0	9	0	0	0	0	113	27	17	34
Domibacillus	9	6	17	10	16	22	6	8	28	11	41	21
Phragmitibacter	16	24	35	22	1	0	16	7	13	25	22	31
Armatimonas/Armatimonadetes_gp1	43	54	25	71	0	1	0	7	2	7	10	2
Dongia	146	43	9	12	1	1	1	1	1	4	1	9
Glycomyces	6	0	0	7	14	11	14	7	37	33	51	13
unc_Chloroflexia	29	8	36	75	16	6	10	6	0	3	5	4
Agromyces	0	0	0	20	26	18	31	20	12	17	22	8
Noviherbaspirillum	34	19	4	27	10	20	13	15	14	16	10	11
Lautropia	0	0	0	6	11	14	22	19	29	17	39	26
Gp22	0	0	0	0	11	16	28	16	29	27	25	31
Actinocorallia	9	15	38	37	0	0	0	0	29	42	17	17
Segetibacter	28	29	8	113	0	0	0	0	5	5	7	11
unc_Methylobacteriaceae	6	13	0	5	5	15	14	21	22	28	21	22
Sporomusa	15	8	16	67	18	3	8	20	3	3	5	0
unc_Kineosporiaceae	50	45	15	30	0	10	19	8	0	0	9	0
Erythrobacter	0	6	0	9	5	8	24	14	30	24	29	18
Pontibacter	0	0	0	1	9	29	18	34	23	15	15	8
unc_Chloroflexales	0	0	0	0	22	35	30	37	5	5	5	2
Gp15	26	21	31	3	10	6	6	13	12	10	13	17
Rhizobacter	0	0	0	0	21	45	25	6	0	21	14	14
Anaeromyxobacter	3	92	40	6	2	7	3	12	1	3	8	6
Luteolibacter	0	0	0	0	24	17	31	15	4	24	10	16
Sphingobium	0	1	0	6	0	47	22	15	24	22	4	6
Armatimonas/Armatimonadetes	17	17	18	21	10	8	11	10	7	16	11	10
Laceyella	12	136	7	6	0	4	3	0	10	0	3	7
Azotobacter	0	0	0	0	4	6	12	109	0	0	0	0
Dokdonella	15	9	29	35	0	0	0	0	0	12	38	25
unc_Thermoactinomycetaceae1	15	38	52	54	0	0	0	0	1	7	1	1
Bosea	0	0	2	0	29	25	28	20	3	6	0	14
unc_Ruminococcaceae	8	1	9	8	2	7	7	6	42	24	22	15
Aetherobacter	10	8	6	8	14	20	22	12	0	10	18	12
Asprobacter	7	3	0	3	0	5	6	5	26	33	41	23
Acetivibrio	9	0	4	10	0	1	0	0	93	20	9	6
unc_Nevskiales	0	1	4	5	7	24	31	26	6	14	6	9
Tellurimicrobium	20	58	20	10	0	6	8	0	0	16	12	13
Amycolatopsis	45	63	0	25	0	0	12	0	0	0	0	21
Aridibacter	5	0	0	10	8	21	13	9	13	10	28	17
Singulisphaera	19	39	13	3	12	5	3	3	5	14	18	12
Labrys	17	0	9	19	0	12	14	9	0	24	21	15
Aeribacillus	41	77	29	16	0	0	0	0	0	0	0	0
Armatimonadetes	30	17	23	19	5	11	13	11	5	2	1	2
Polyangium	5	0	0	12	0	18	3	37	9	11	22	12
unc_Streptosporangiaceae	20	13	7	9	2	12	13	13	12	15	8	10
Terrimonas	1	1	0	0	6	6	3	6	41	17	26	23
Armatimonadetes_gp2	1	0	1	0	0	9	1	84	4	0	12	2
WPS-2_genera_incertae_sedis	36	60	39	15	0	0	0	0	0	0	0	0
unc_BRC1	4	10	0	6	7	20	14	18	7	5	27	3
Niastella	13	24	3	9	0	6	3	6	9	18	25	19
Thermomonas	0	0	7	9	12	19	18	15	12	10	6	7
Aquihabitans	12	0	10	8	14	0	0	0	17	27	15	21
Caulobacter	5	11	5	8	11	15	8	9	8	17	13	10
unc_Chloroplast	39	9	2	17	5	17	8	3	5	10	4	7
Angustibacter	29	21	0	73	0	0	0	0	0	10	0	0
unc_Saprospirales	0	0	0	7	6	11	9	10	35	14	18	5
Ammoniphilus	17	8	8	27	17	0	0	0	13	8	12	8
Rhizocola	0	0	0	0	8	5	4	0	18	46	17	19
unc_Thermomonosporaceae	25	23	12	9	5	28	1	3	4	3	6	1
Geminicoccus	9	0	2	13	3	4	8	11	9	20	21	16
unc_Microbacteriaceae	35	25	10	38	1	0	4	0	5	2	1	5
unc_Thermoactinomycetaceae 1	15	10	19	10	10	3	2	2	16	6	18	4
Microbacterium	0	11	0	0	0	0	0	0	0	74	36	0
Brevundimonas	0	0	0	7	30	17	10	9	7	4	8	0
Rhodococcus	18	14	0	13	10	23	14	0	1	14	0	0
Herpetosiphon	0	0	0	0	15	22	22	28	0	3	0	2
Vampirovibrio	23	12	14	20	0	11	5	3	5	4	7	10
Ureibacillus	6	12	2	3	0	0	0	0	60	11	13	5
unc_Ktedonobacterales	7	7	4	48	0	0	0	0	26	11	1	8
unc_Thermomicrobia	0	0	4	0	3	14	12	13	12	15	12	17
Longispora	12	15	25	12	6	12	1	11	3	0	10	0
Fontibacillus	18	5	3	0	7	20	40	5	0	0	0	0
Legionella	8	42	45	8	4	0	1	1	1	1	1	5
Actinopolymorpha	20	33	17	20	0	0	0	0	5	11	8	4
unc_Latescibacteria	0	0	0	0	25	21	7	28	3	0	0	0
Peredibacter	8	7	1	25	3	10	13	3	15	9	4	6
Opitutus	10	24	13	7	0	1	0	0	17	18	4	19
Phaselicystis	3	21	5	14	13	8	3	3	2	6	10	13
Alsobacter	30	32	7	22	0	12	0	0	0	0	0	9
unc_Promicromonosporaceae	0	26	0	0	0	0	0	16	12	13	15	23
Gemmatirosa	12	19	29	43	0	0	0	0	0	0	4	0
Bdellovibrio	16	10	7	19	2	3	5	6	10	10	5	6
Armatimonadetes_gp5	6	21	7	5	7	14	7	10	1	9	1	6
unc_Caulobacteraceae	6	17	7	11	2	12	6	3	7	8	13	5
Enhygromyxa	0	0	0	0	11	5	18	18	7	3	14	8
Thermobacillus	16	61	10	4	0	0	0	0	18	0	2	0
unc_Fulvivirgaceae	0	2	0	1	1	9	2	6	6	51	8	8
Tissierella	6	0	0	7	0	4	0	0	23	21	24	9
unc_Myxococcaceae	24	0	0	28	0	4	3	12	5	6	3	7
unc_Cytophagales	9	4	0	7	2	3	2	5	14	16	15	15
Terribacillus	9	12	10	8	2	13	7	12	9	3	2	0
unc_Gemmataceae	8	29	5	9	1	2	13	6	10	9	0	1
Candidatus Solibacter	16	43	23	9	0	0	0	0	0	0	0	10
Ferruginibacter	0	0	0	0	1	17	7	5	9	14	17	14
unc_CandidatusSaccharibacteria	0	54	45	0	0	0	0	0	0	3	0	0
Aquabacterium	0	0	0	8	6	13	10	19	0	11	2	9
Actinomycetospora	23	13	8	17	0	9	5	8	0	0	0	3
Pseudofulvimonas	0	0	0	0	52	0	0	2	0	0	0	0
Caldibacillus	21	58	8	10	0	0	0	0	0	0	0	0
Methanomassiliicoccus	0	0	0	0	5	27	17	13	1	6	0	1
Brevitalea	3	5	13	11	0	0	0	0	15	19	7	11
Flavobacterium	10	15	1	8	4	1	2	7	1	15	4	14
Anoxybacillus	11	32	6	6	0	0	0	0	18	6	7	3
Thermoclostridium	1	2	3	0	0	5	4	2	27	15	3	17
unc_Rhodocyclales	6	6	4	3	12	5	2	7	7	5	9	7
unc_Rhodothermales	0	0	0	0	18	20	9	12	3	0	1	0
Rummeliibacillus	10	21	13	6	0	0	0	0	6	11	13	5
Spartobacteria_genera_incertae	13	3	7	3	2	6	5	0	7	4	8	20
Herbinix	0	4	4	0	0	0	0	0	58	7	5	0
Gp9	0	0	0	0	4	14	28	18	0	0	0	0
Actinophytocola	34	8	14	18	0	0	0	0	0	0	7	0
Gp12	0	0	0	0	4	14	31	14	1	0	0	0
Polaromonas	0	3	0	3	11	13	8	8	0	5	3	11
Propionispira	6	6	2	0	22	4	5	2	2	7	5	2
Pseudomonas	0	0	0	0	3	0	52	0	2	3	6	0
Terrisporobacter	5	13	5	0	0	0	0	0	10	21	12	11
Anaerocolumna	12	9	11	20	0	2	7	0	4	3	2	5
unc_Bacillaceae2	2	0	2	4	0	0	0	0	9	37	10	8
Allocatelliglobosispora	0	6	0	0	10	8	11	12	6	3	0	5
Geomonas	0	0	0	0	2	21	13	14	0	3	8	0
Truepera	0	0	0	0	12	10	9	13	5	2	5	1
unc_Mycobacteriales	0	0	0	0	3	0	0	1	16	29	0	19
Paracoccus	0	0	0	0	15	0	0	0	28	0	17	0
Rhodocytophaga	0	0	0	1	0	3	1	2	16	13	19	13
unc_Parachlamydiaceae	2	66	4	2	4	0	0	0	0	0	0	3
Aggregicoccus	16	8	0	13	0	0	3	7	0	4	8	11
Nibribacter	0	0	0	0	0	3	5	2	17	20	10	10
Demequina	0	0	0	0	24	10	5	11	0	0	0	0
Pseudoxanthomonas	0	4	0	0	9	9	13	0	0	7	12	5
unc_Nitrosomonadales	0	0	0	0	5	6	13	9	10	6	7	0
Mucilaginibacter	56	11	1	0	0	0	0	0	0	0	1	2
Ornithinibacter	0	0	0	0	15	13	21	0	0	0	0	0
Bacillariophyta	1	8	0	1	1	4	2	6	13	23	2	0
unc_Burkholderiaceae	0	0	0	0	6	15	9	6	9	2	4	2
Novibacillus	15	26	7	14	0	0	0	2	3	0	0	0
Gracilibacter	2	0	6	5	0	0	1	11	4	9	6	10
Lacrimispora	3	6	3	6	5	3	7	6	1	4	2	6
unc_Nitriliruptoria	0	0	0	0	8	8	8	7	9	3	4	0
Achromobacter	0	0	0	4	28	0	0	0	0	0	6	0
unc_Tissierellaceae	3	0	4	4	0	0	1	2	10	9	13	7
unc_Nannocystaceae	0	0	0	3	3	4	3	7	5	7	9	8
Aliidongia	12	31	8	6	0	0	0	0	0	0	1	3
Gp13	8	9	9	8	4	0	3	0	2	0	3	7
Compostibacillus	5	0	0	0	0	0	0	0	10	0	33	4
Ruminiclostridium	6	0	4	3	0	3	0	0	14	8	8	6
Gp20	0	0	0	0	0	8	5	8	6	8	6	7
Alkaliphilus	3	1	0	8	0	1	2	0	18	8	10	0
Oceanobacillus	8	2	6	8	0	0	2	0	9	17	0	0
Oligoflexus	0	4	0	15	2	2	2	5	2	3	8	4
Tepidisphaera	3	7	8	7	1	3	0	7	5	4	3	0
Chelatococcus	0	0	0	0	0	0	4	0	10	20	6	8
Williamsia	0	9	0	7	3	0	2	2	6	6	12	0
unc_Arenimicrobiaceae	0	0	0	0	5	5	4	6	8	9	1	4
unc_Armatimonadetes	5	7	15	3	0	0	1	8	1	3	0	5
Catenulispora	34	11	8	0	0	0	0	0	0	0	0	0
Chlorophyta	3	7	0	4	3	0	0	1	0	6	16	7
Aquamicrobium	0	0	0	0	30	0	0	0	0	0	0	0
unc_Sphingobacteriaceae	4	4	3	5	3	2	2	1	4	3	9	5
Thermopolyspora	0	9	0	0	4	0	3	0	24	0	4	0
Iamia	0	0	0	2	3	7	2	6	6	10	3	2
Dyella	19	12	4	10	0	0	0	0	0	0	4	0
Limnochorda	8	8	4	10	0	0	0	14	0	0	0	0
Sedimentibacter	2	1	6	6	1	0	2	1	12	8	4	0
Proteiniborus	0	0	0	0	0	0	4	0	34	4	0	0
Chitinophaga	5	14	4	2	6	1	1	2	0	7	1	0
unc_Verrucomicrobia	0	2	1	0	2	5	11	0	4	7	2	6
Sphingoaurantiacus	0	0	0	1	3	9	3	7	7	5	1	1
Parasegetibacter	0	0	0	0	0	0	0	0	2	20	6	14
Ktedonobacter	41	0	0	4	0	0	0	0	0	0	0	0
Cellvibrio	5	0	0	3	17	0	4	0	1	0	0	1
Parapedobacter	0	0	0	0	26	0	0	0	0	0	0	0
Hydrogenophaga	0	0	0	0	15	0	11	3	0	0	0	0
Rhodopila	10	6	7	5	0	0	0	0	3	2	3	5
Rhodanobacter	8	32	0	3	0	0	0	0	0	0	1	2
Sporichthya	8	4	3	0	4	3	7	3	0	3	0	0
Allokutzneria	0	0	0	0	3	3	4	1	2	6	4	10
Planococcus	0	0	0	0	0	0	0	2	2	2	25	4
Kaistia	0	11	0	0	10	9	0	0	0	0	0	0
Desulfosporosinus	0	0	0	2	0	6	0	3	0	6	13	3
Patulibacter	1	2	1	0	13	5	1	0	0	2	0	1
Desertibacter	0	0	0	0	2	7	5	11	3	0	0	0
Dyadobacter	1	4	0	0	0	9	2	0	1	2	11	2
Desulfitobacterium	0	0	0	0	0	0	0	0	32	0	0	0
Flaviaesturariibacter	2	0	1	16	0	0	0	0	3	2	5	4
Acidobacterium	8	10	10	8	0	0	0	0	0	0	0	0
Micropepsis	0	3	5	1	0	1	0	1	8	8	1	5
Anaerosporobacter	0	2	1	0	9	3	3	0	3	5	1	0
unc_Deinococci	0	0	0	0	1	10	3	3	3	5	2	2
Virgibacillus	0	0	8	0	4	3	5	4	0	2	0	2
unc_Halanaerobiaceae	0	0	0	0	0	0	3	3	23	0	0	0
unc_Methylophilaceae	0	0	0	0	3	6	2	4	1	7	1	3
Dictyobacter	0	0	0	2	0	5	0	1	4	5	5	7
Cellulosilyticum	1	5	2	2	0	0	0	0	10	5	5	1
Desulfohalotomaculum	0	0	0	0	0	1	1	0	23	2	2	0
Sphingobacterium	11	0	0	0	4	1	0	0	0	0	12	0
Subdivision3_genera_incertae	1	2	6	6	0	0	0	0	1	6	7	1
Parafilimonas	6	3	12	4	0	0	0	0	2	3	0	0
Sporacetigenium	2	0	2	2	0	0	2	0	9	3	5	3
Pseudenhygromyxa	0	0	0	2	0	2	8	6	3	2	2	0
Rurimicrobium	0	3	0	17	0	1	1	0	1	2	3	0
Caldovatus	0	0	0	1	0	4	2	12	2	0	2	1
Vulgatibacter	5	0	8	5	0	1	0	0	2	1	6	0
unc_Rhizobiaceae	0	0	0	0	8	0	5	0	0	3	0	6
unc_Xanthomonadaceae	0	0	0	0	7	1	5	5	0	0	0	3
unc_Oligoflexales	5	3	2	1	0	0	1	1	6	5	2	1
Lutispora	0	0	0	0	0	0	0	0	12	7	0	7
Pelotomaculum	0	0	0	0	1	0	1	1	6	9	4	3
unc_Cytophagaceae	4	1	1	3	11	0	0	0	0	0	0	0
Kineosporia	0	0	0	13	3	1	3	2	0	0	0	0
Fimbriiglobus	0	0	0	1	2	9	5	1	0	0	2	1
Chitinispirillum	0	0	0	0	0	1	2	0	2	5	10	4
Sphaerisporangium	0	4	0	3	0	0	0	0	8	3	5	2
Woeseia	0	0	0	0	5	3	5	6	0	0	0	0
unc_Cyanobacteria	0	0	0	0	2	2	8	3	0	1	4	1
unc_Clostridiaceae1	0	0	2	1	1	0	0	2	9	2	0	6
Seinonella	7	1	3	14	0	0	0	0	0	0	0	0
Risungbinella	2	23	1	2	0	0	0	0	1	0	0	0
Nitrosomonas	0	0	0	0	5	2	3	2	1	2	3	2
Prosthecobacter	0	9	0	0	1	6	3	3	0	0	0	1
Thermoflexus	0	7	4	0	0	2	3	2	1	1	2	2
Aquisphaera	5	6	3	8	0	0	1	0	0	0	0	2
Stenotrophomonas	6	6	0	0	0	0	3	2	0	3	4	0
unc_Xanthobacteraceae	0	3	0	1	4	0	1	2	0	8	1	1
Arenibacter	0	0	0	0	14	0	0	0	0	0	0	0
Caldalkalibacillus	2	3	2	2	0	1	3	4	1	2	1	0
Filomicrobium	2	0	1	3	5	0	0	1	1	3	2	0
Rhodoferax	0	2	0	0	0	5	4	3	0	1	1	3
Kroppenstedtia	7	5	2	6	0	0	1	0	0	0	1	0
unc_Bacillaceae 2	0	0	0	0	0	1	1	0	6	8	2	2
Inquilinus	4	2	1	8	0	0	0	1	0	0	0	4
Thermomonospora	3	2	0	0	0	0	0	0	2	6	4	3
Gorillibacterium	2	4	6	0	1	2	1	1	0	1	0	1
Rufibacter	0	0	0	0	1	4	2	1	4	3	2	0
Methylobacterium	0	12	0	0	0	0	0	0	6	0	3	0
Luteimonas	0	0	0	0	12	0	0	0	0	0	0	0
unc_Chelatococcaceae	0	0	0	1	10	0	0	0	0	0	1	1
unc_Chlamydiales	5	3	3	2	2	2	0	1	0	0	0	0
Aquipuribacter	0	0	0	0	5	4	1	4	0	0	0	0
Pedobacter	0	0	0	9	3	0	0	1	0	0	3	0
Methylotenera	0	0	0	0	4	5	5	0	0	0	0	0
Smaragdicoccus	2	6	1	2	0	1	0	0	0	1	2	4
Niabella	0	0	0	0	2	3	0	0	0	4	5	2
Arthrobacter	0	3	0	0	0	0	0	0	5	6	0	4
unc_Rubricoccaceae	0	0	0	0	3	3	3	3	2	0	0	0
Motilibacter	7	5	2	3	0	0	0	0	0	1	1	0
unc_Eubacteriaceae	0	0	0	2	0	0	0	0	3	1	9	2
unc_Planctomycetacia	0	4	1	1	1	2	3	2	1	0	1	0
unc_Beijerinckiaceae	0	0	0	0	0	0	0	0	0	5	7	5
Paraburkholderia	11	0	5	0	0	0	0	0	0	0	1	1
Algisphaera	0	2	0	0	0	3	4	1	0	3	3	0
Thermobispora	0	5	0	0	0	2	0	1	8	0	1	0
unc_Alcaligenaceae	0	0	1	1	0	0	0	0	4	0	10	0
Parcubacteria_genera_incertae_sedis	2	4	8	0	0	1	2	0	0	0	0	0
Aneurinibacillus	1	4	3	1	0	0	0	0	4	0	1	3
Deinococcus	0	2	0	7	0	0	0	2	0	1	2	2
Herminiimonas	5	0	0	2	0	1	1	1	0	2	2	2
Geobacillus	2	9	0	0	0	0	0	0	3	2	0	2
Brucella	0	0	0	0	0	0	0	0	0	0	0	16
Oscillochloris	0	0	0	0	5	2	4	1	0	0	0	0
Rubrivirga	0	0	0	0	1	2	4	6	0	0	0	0
Latescibacteria_genera_incertae	0	0	0	0	0	1	0	1	3	2	4	4
Phytomonospora	1	0	0	1	0	0	0	0	1	0	12	0
Methylocystis	1	2	0	2	2	0	1	1	2	0	2	1
unc_Sporomusaceae	0	0	0	0	2	0	1	8	0	0	0	1
Flavihumibacter	0	0	0	0	2	0	0	0	0	11	1	0
Piscinibacter	0	0	0	0	0	3	4	3	0	0	0	3
Actinocatenispora	3	10	4	0	0	0	0	0	0	0	0	0
Sinibacillus	0	0	0	0	0	0	0	0	14	0	0	0
Aromatoleum	0	0	0	0	1	0	6	5	0	0	0	0
Tepidimicrobium	1	3	0	0	0	0	0	4	6	0	0	0
Jiangella	0	0	0	0	1	1	1	1	5	0	4	0
Syntrophaceticus	0	2	3	0	3	0	0	0	3	2	0	0
unc_Archaea	0	0	0	0	2	4	3	0	0	1	0	2
Ornithinibacillus	0	0	5	0	0	0	0	0	9	0	0	0
unc_Cyclobacteriaceae	0	0	0	0	9	0	0	0	0	0	0	0
Aureibacillus	0	0	0	0	0	4	6	2	0	0	0	0
Defluviicoccus	0	0	0	0	0	4	0	0	3	0	6	0
Pseudoduganella	0	1	0	1	0	4	0	2	0	3	1	1
unc_Pirellulales	1	1	0	5	0	1	0	0	0	3	2	1
Melaminivora	0	0	0	0	0	0	0	0	0	14	0	0
unc_Methylocystaceae	1	1	0	0	0	1	2	1	2	0	5	0
Ammoniibacillus	0	0	0	0	0	0	0	0	13	0	0	0
Thermostaphylospora	0	0	0	0	1	0	2	2	2	2	2	1
Haloplasma	5	2	3	1	0	0	1	0	0	1	1	0
unc_Phycisphaerae	0	0	0	0	0	0	0	0	3	2	5	3
Planomicrobium	0	0	0	0	0	7	1	0	1	0	2	0
Tepidanaerobacter	1	0	0	0	0	0	2	0	8	0	0	1
Nakamurella	0	9	0	0	0	0	0	0	0	0	0	5
Pseudobacteriovorax	0	0	0	7	0	0	0	0	0	1	3	1
Dethiobacter	2	0	0	3	0	0	0	0	5	1	0	1
Cumulibacter	0	0	0	1	7	0	0	0	0	0	0	0
unc_Cyanobacteria/Chloroplast	2	0	0	1	0	0	0	0	0	4	4	1
ClostridiumIV	0	0	0	1	6	1	0	0	0	0	0	0
Lacipirellula	0	1	1	0	2	2	1	0	0	2	1	0
Metabacillus	6	2	3	1	0	0	0	0	0	0	0	0
Methanoculleus	0	0	0	0	0	0	0	0	1	3	1	6
Sulfuricaulis	0	1	4	3	0	0	0	1	0	0	0	2
unc_Nevskiaceae	0	0	0	1	0	4	0	1	0	4	0	0
Syntrophomonas	4	0	1	0	0	0	0	0	2	1	2	1
unc_Dictyobacteraceae	10	2	0	0	0	0	0	0	0	0	0	0
Acinetobacter	0	0	0	0	0	0	4	5	0	0	0	0
Croceifilum	0	0	1	0	2	2	0	0	4	0	0	0
Taibaiella	2	0	0	0	0	0	0	2	4	0	2	0
Rickettsia	0	0	0	0	3	3	0	0	0	0	2	0
unc_Planctomycetes	0	0	0	0	0	0	2	0	0	6	2	0
Natranaerovirga	0	0	0	0	0	0	0	0	2	1	3	4
Pyxidicoccus	0	0	0	0	0	0	0	0	4	5	0	1
Tahibacter	0	0	0	0	0	0	5	1	0	3	0	0
Candidatus Hydrogenedens	0	0	0	0	4	0	0	2	0	0	1	0
Geobacter	0	0	0	0	0	2	0	6	0	0	0	0
Bacteriovorax	0	0	0	2	0	2	0	0	2	0	2	1
Streptophyta	2	0	1	0	0	1	2	1	0	2	0	0
Methylobacter	0	0	0	0	0	1	0	0	1	0	7	0
Roseimicrobium	2	3	0	1	0	0	1	0	0	3	0	0
Umezawaea	4	2	0	0	0	0	0	0	0	0	2	2
Acidovorax	0	0	0	0	0	0	4	2	0	0	2	0
Edaphobaculum	2	0	0	2	0	0	0	0	1	0	3	1
Marinicrinis	1	0	6	0	0	0	0	0	2	0	0	0
Constrictibacter	0	0	0	0	1	0	1	0	3	2	0	1
Chryseobacterium	0	0	0	0	0	0	0	3	0	2	2	1
Gemmata	0	3	0	1	0	1	0	0	0	2	0	2
Pseudoclostridium	0	5	1	0	0	2	0	0	1	0	0	0
Amphibacillus	0	0	0	0	0	0	0	0	4	0	4	0
Humibacter	0	10	0	0	0	0	0	0	0	0	0	0
Corynebacterium	0	2	0	0	0	0	0	1	4	1	0	0
Embleya	1	0	0	0	3	1	1	0	0	0	0	0
Asticcacaulis	0	2	0	0	4	0	0	0	0	0	0	0
unc_Subdivision3	0	0	0	0	0	1	1	2	0	1	1	1
Jeotgalibacillus	0	0	0	0	0	0	2	1	3	0	0	1
Gp19	0	0	0	0	1	4	1	0	0	0	0	0
unc_Bacilli	1	0	0	2	0	0	0	2	0	2	0	0
Byssovorax	0	1	0	4	0	0	1	1	0	0	0	0
Saccharibacteria_genera_incertae	0	0	0	0	3	0	0	2	0	0	0	0
Saccharomonospora	0	0	0	0	0	0	0	0	0	0	7	0
Desulfotomaculum	0	0	1	0	0	0	0	0	3	1	2	0
Polycladomyces	0	1	0	0	0	1	0	0	3	0	0	2
Halobacillus	1	0	0	3	2	0	0	0	0	0	0	0
Alterococcus	0	1	0	1	0	0	0	1	0	0	1	3
Tsukamurella	0	0	0	0	3	1	1	0	0	0	0	0
unc_Silvanigrellaceae	0	0	0	0	1	0	0	0	5	0	0	0
unc_Oligoflexia	0	0	0	0	3	0	0	0	1	0	1	0
Scopulibacillus	2	0	4	0	0	0	0	0	0	0	0	1
Parachlamydia	0	3	1	0	0	1	0	0	0	1	0	1
unc_Negativicutes	0	0	0	0	1	2	0	2	0	0	0	0
Leadbetterella	0	0	0	0	4	0	0	0	0	0	0	0
Pseudogracilibacillus	0	0	0	0	4	0	0	0	0	0	0	0
unc_Spartobacteria	0	0	1	1	2	0	0	0	0	0	1	0
unc_Heliobacteriaceae	0	0	0	0	0	0	0	0	4	2	0	0
Anaerovorax	0	1	0	1	0	0	0	1	0	0	2	1
Schnuerera	0	0	2	0	0	0	0	0	2	0	2	0
Caproiciproducens	0	1	0	3	0	0	0	1	0	0	0	1
unc_Burkholderiales_incertae	0	0	0	0	0	0	0	0	0	0	0	6
Solitalea	0	0	0	0	0	0	0	0	0	5	0	1
Desulfallas	0	0	0	1	0	0	2	2	0	0	0	0
unc_Micropepsaceae	4	0	1	0	0	0	0	0	0	0	1	0
unc_Coriobacteriia	0	0	0	0	0	0	0	3	0	2	0	0
Tepidibaculum	0	0	0	0	2	1	0	1	0	0	0	0
Roseithermus	0	0	0	0	2	0	1	1	0	0	0	0
unc_Vicinamibacteria	0	0	0	0	0	2	0	0	1	0	2	0
Nemorincola	2	2	0	2	0	0	0	0	0	0	0	0
Calditerricola	0	0	0	0	0	0	2	0	3	0	0	0
Pullulanibacillus	2	2	2	0	0	0	0	0	0	0	0	0
unc_Thermoguttaceae	0	0	1	0	0	0	1	1	0	0	0	2
Dietzia	0	0	0	0	0	0	0	0	5	0	0	0
Natronincola	0	0	1	0	0	0	0	0	3	0	1	0
Roseiflexus	0	0	0	0	0	0	0	0	0	1	4	0
unc_Pseudomonadaceae	0	0	0	0	0	0	0	0	0	3	2	0
Alkalibaculum	0	0	0	0	0	0	0	0	1	3	0	1
unc_Halanaerobiales	0	0	0	0	0	0	0	0	0	3	1	1
Pseudolabrys	0	0	3	2	0	0	0	0	0	0	0	0
Cupriavidus	0	0	0	0	0	0	0	0	0	5	0	0
Blautia	2	0	0	0	0	0	0	0	2	1	0	0
Sporolactobacillaceae_incertae_sedis	1	0	0	0	0	0	0	0	0	2	0	2
unc_Lacipirellulaceae	0	0	0	0	0	4	0	0	0	0	0	0
Luteibacter	0	0	0	0	3	0	0	0	0	0	0	0
Lactococcus	0	0	0	0	3	0	0	0	0	0	0	0
Roseimaritima	0	0	0	0	3	0	0	0	0	0	0	0
Deinobacterium	0	0	1	0	0	3	0	0	0	0	0	0
Sphaerotilus	0	1	0	0	0	0	0	3	0	0	0	0
Desulfuromonas	0	0	0	0	2	0	1	0	0	0	0	0
unc_Peptococcaceae2	0	1	0	0	0	0	0	2	0	0	1	0
Clostridioides	1	0	1	1	0	0	0	1	0	0	0	0
Caldicoprobacter	0	0	0	0	0	0	0	0	3	1	0	0
Falsirhodobacter	0	0	0	0	0	0	0	0	0	0	4	0
Oryzihumus	0	0	0	0	0	0	0	0	0	0	2	2
Raineyella	0	0	0	0	0	0	0	0	1	0	0	3
Acidiferrimicrobium	0	5	0	0	0	0	0	0	0	0	0	0
Bifidobacterium	0	0	0	0	0	0	0	0	0	4	0	0
unc_Paenibacillaceae 1	1	0	2	0	0	0	0	0	0	1	0	0
unc_Bacteriovoracaceae	0	0	0	0	1	0	2	0	0	0	0	0
Terriglobus	1	1	1	1	0	0	0	0	0	0	0	0
Liquorilactobacillus	0	0	1	0	1	0	1	0	0	0	0	0
Pelomonas	0	0	0	0	0	1	0	2	0	0	0	0
Paludisphaera	0	2	0	0	0	0	0	0	0	0	1	1
Lacibacter	0	0	0	0	0	2	0	1	0	0	0	0
Thiobacillus	0	0	0	0	0	3	0	0	0	0	0	0
Caldimonas	0	0	0	0	0	3	0	0	0	0	0	0
Thermaerobacter	2	2	0	0	0	0	0	0	0	0	0	0
Algoriphagus	0	0	0	0	0	0	0	1	0	0	2	0
BRC1_genera_incertae	0	0	0	0	0	0	0	1	1	1	0	0
Lacunisphaera	0	0	0	0	0	0	0	1	0	0	0	2
Panacibacter	0	0	0	0	0	1	0	0	0	1	0	1
Chiayiivirga	0	0	0	0	2	0	0	0	0	0	0	0
unc_Methanosarcinales	0	0	0	0	2	0	0	0	0	0	0	0
Diplorickettsia	0	0	0	0	0	0	0	0	3	0	0	0
Defluviitalea	0	0	0	0	0	0	0	0	3	0	0	0
Ruminococcus	0	0	0	0	0	0	0	0	3	0	0	0
Effusibacillus	0	0	0	0	0	0	0	0	3	0	0	0
Methylocaldum	0	0	0	0	0	0	0	0	2	0	1	0
unc_Hymenobacteraceae	0	0	0	0	0	0	0	0	0	0	3	0
Turneriella	0	0	0	0	0	0	0	0	1	0	0	2
Jeotgalibaca	0	0	0	0	0	0	0	0	0	2	1	0
Sarcina	0	0	0	0	0	0	0	0	0	2	0	1
unc_Acidiferrobacteraceae	1	1	0	0	0	1	0	0	0	0	0	0
Tuberibacillus	0	1	1	1	0	0	0	0	0	0	0	0
Ferrovibrio	0	0	0	0	1	0	1	0	0	0	0	0
Anaerotignum	0	0	0	0	1	0	1	0	0	0	0	0
Schaalia	1	0	0	0	1	0	0	0	0	0	0	0
unc_Peptococcaceae 2	0	0	0	0	0	1	0	1	0	0	0	0
Psychrobacter	0	0	0	0	0	2	0	0	0	0	0	0
unc_Desulfuromonadaceae	0	0	0	0	0	2	0	0	0	0	0	0
Duganella	0	0	0	0	0	2	0	0	0	0	0	0
Verrucomicrobium	0	0	0	0	0	0	1	1	0	0	0	0
unc_Ectothiorhodospiraceae	0	0	0	0	0	0	2	0	0	0	0	0
unc_Woesearchaeota	0	0	0	0	0	0	2	0	0	0	0	0
Zavarzinella	0	0	0	0	0	0	2	0	0	0	0	0
unc_Devosiaceae	0	0	0	0	0	0	0	1	0	0	1	0
Tagaea	0	0	0	0	0	1	0	0	0	0	1	0
GpI	0	0	0	1	0	0	1	0	0	0	0	0
unc_Bacteriovoracales	0	0	0	0	0	0	0	0	2	0	0	0
Chujaibacter	0	0	0	0	0	0	0	0	2	0	0	0
Urmitella	0	0	0	0	0	0	0	0	1	0	1	0
Adlercreutzia	0	0	0	0	0	0	0	0	0	0	2	0
unc_Cryomorphaceae	0	0	0	0	0	0	0	0	1	0	0	1
Blastocatella	0	0	0	1	0	0	0	0	0	0	1	0
Sanguibacter	0	0	0	2	0	0	0	0	0	0	0	0
Subtercola	0	0	0	0	0	0	0	0	1	1	0	0
Sporotomaculum	0	0	1	0	0	0	0	0	1	0	0	0
unc_Symbiobacteriaceae	0	0	1	0	0	0	0	0	1	0	0	0
unc_Verrucomicrobiae	0	0	0	1	0	0	0	0	0	0	0	1
Ornithinimicrobium	0	0	0	0	0	0	0	0	0	0	0	2
Limnoglobus	0	0	0	0	0	0	0	0	0	0	0	2
Haliangium	0	0	0	0	0	0	0	0	0	1	0	1
Gottschalkia	0	0	1	0	0	0	0	0	0	0	0	1
Methanosarcina	0	0	0	0	0	0	0	0	0	2	0	0
unc_Anaeromyxobacteraceae	0	0	0	0	0	0	0	0	0	2	0	0
unc_Halieaceae	0	0	0	0	0	0	0	0	0	2	0	0
Nocardiopsis	0	0	2	0	0	0	0	0	0	0	0	0
unc_Parcubacteria	0	0	2	0	0	0	0	0	0	0	0	0
Neochlamydia	1	0	1	0	0	0	0	0	0	0	0	0
unc_Sneathiellaceae	1	0	1	0	0	0	0	0	0	0	0	0
Saccharopolyspora	0	1	0	0	0	0	0	0	1	0	0	0
Abditibacterium	2	0	0	0	0	0	0	0	0	0	0	0
Caenibacillus	0	1	0	1	0	0	0	0	0	0	0	0
unc_Sphingomonadales	0	1	0	0	0	0	0	0	0	0	0	1
Caballeronia	1	1	0	0	0	0	0	0	0	0	0	0
Fluviispira	0	2	0	0	0	0	0	0	0	0	0	0
Psychroglaciecola	0	2	0	0	0	0	0	0	0	0	0	0
unc_Rickettsiales	0	2	0	0	0	0	0	0	0	0	0	0

## Sheet: Families
	Karasuk 1	Karasuk 2	Karasuk 3	Karasuk 4	Novosibirsk 1	Novosibirsk 2	Novosibirsk 3	Novosibirsk 4	Toguchin 1	Toguchin 2	Toguchin 3	Toguchin 4
Gp6	4803	6028	6191	5073	5416	6483	7188	6364	11296	12114	11692	11670
Gp16	7361	6781	6458	4203	9064	10896	10699	9576	3403	3749	4186	3772
unc_Bacteria	6094	6469	7841	6498	3430	4744	4459	4560	4998	4712	4741	4947
unc_Actinobacteria	2155	1937	1923	1551	5466	7262	8695	7954	4357	4958	3847	4744
Gaiellaceae	2791	4127	3391	2214	1062	1385	1857	1764	4994	5331	3834	5127
unc_Solirubrobacterales	2656	3163	2456	1839	977	1404	1279	1057	1841	1973	1733	1798
Gemmatimonadaceae	3297	3098	2532	2737	416	482	489	502	896	934	1305	1194
unc_Acidobacteria	1261	1160	1736	1920	1173	1347	1538	1583	1415	1003	964	842
Gp4	118	201	1622	2600	723	1130	784	1189	1799	2060	1637	2086
unc_Rhizobiales	1197	1766	1575	730	332	781	828	721	1918	2136	1904	2271
Micrococcaceae	1521	802	441	1532	1197	1942	2064	2417	582	601	721	604
Bacillaceae1	2000	1524	1434	1620	431	336	304	209	1737	1605	2170	1811
Micromonosporaceae	2624	2610	2027	1908	176	378	335	412	677	842	780	661
Streptomycetaceae	2379	2414	1232	1783	390	757	561	498	507	502	898	659
Nocardioidaceae	1250	1381	714	1242	793	1207	1085	836	297	318	442	301
unc_Betaproteobacteria	1168	1290	1197	738	423	567	606	565	794	827	918	961
Sphingomonadaceae	1383	1294	860	1401	349	852	456	374	607	600	571	593
Geodermatophilaceae	1038	914	633	1348	532	921	814	724	370	543	499	564
Bradyrhizobiaceae	1335	2586	1515	872	9	135	117	120	590	841	689	941
unc_Gemmatimonadetes	777	1047	940	839	461	606	653	613	822	610	757	665
unc_Chloroflexi	814	1375	914	1254	411	520	573	521	586	424	592	531
Paenibacillaceae1	1326	1462	911	953	256	432	365	297	875	614	568	627
Gp1	1535	3379	2742	1184	14	26	2	17	52	102	82	131
unc_Thermoleophilia	800	2305	1024	722	212	270	264	216	603	675	536	709
Streptosporangiaceae	1731	2067	1250	1208	7	14	197	136	476	446	456	331
Propionibacteriaceae	503	50	32	59	9	15	53	38	1261	1742	1357	2004
Gp3	1171	1621	778	1043	125	169	195	240	444	441	473	451
Pseudonocardiaceae	1073	1084	822	953	146	401	261	81	319	488	678	593
Rubrobacteraceae	198	103	336	482	482	661	740	446	697	713	705	622
Planococcaceae	712	557	873	895	58	29	7	10	1120	915	941	567
Gp10	2318	2011	41	112	243	277	310	252	133	96	133	72
Hyphomicrobiaceae	240	252	482	582	271	356	405	312	676	601	710	452
Gp17	65	55	197	80	497	804	836	853	369	435	335	372
unc_Rhodospirillales	1014	1350	1028	621	205	215	219	223	169	243	219	245
unc_Acidimicrobiales	258	383	321	229	414	523	570	468	464	519	472	527
Iamiaceae	281	330	372	276	293	534	506	470	429	460	355	343
Solirubrobacteraceae	581	544	513	672	280	306	263	181	347	386	331	347
Anaerolineaceae	0	66	78	50	413	480	680	646	508	447	497	429
Spartobacteria_genera_incertae_sedis	206	303	601	248	45	38	68	52	482	904	794	1116
Ilumatobacteraceae	29	42	31	73	428	467	561	444	564	600	479	405
Chitinophagaceae	400	775	295	907	53	143	29	51	439	458	431	473
unc_Myxococcales	356	442	288	402	206	195	275	244	302	491	442	453
Sphaerobacteraceae	417	582	316	501	100	264	277	228	284	245	314	240
Blastocatellaceae	332	621	285	462	166	261	167	188	295	311	341	304
Gp7	204	47	227	69	144	268	327	343	475	367	302	273
Mycobacteriaceae	391	336	180	314	30	44	52	57	311	506	541	545
Methylobacteriaceae	133	64	42	352	164	233	260	242	309	409	344	336
Steroidobacteraceae	35	42	157	412	60	136	160	147	428	425	428	399
Nitrospiraceae	92	80	101	209	156	291	280	313	301	271	280	286
WPS-1_genera_incertae_sedis	432	601	200	377	64	110	27	88	170	280	325	292
Peptostreptococcaceae	245	855	452	356	0	0	2	1	248	393	228	137
unc_Gammaproteobacteria_incertae	577	426	474	573	14	40	38	38	162	150	155	170
unc_Anaerolineae	206	398	165	86	249	255	272	252	145	163	155	108
Gp25	1	0	32	48	70	118	93	95	525	580	423	494
Caldilineaceae	56	51	45	144	140	265	309	475	169	156	238	212
unc_Gammaproteobacteria	72	89	120	65	133	200	196	171	431	311	322	223
Kofleriaceae	438	265	311	288	93	80	129	97	99	183	251	220
Gp5	103	87	226	148	74	110	152	97	258	339	355	369
Intrasporangiaceae	248	184	128	266	136	223	284	199	0	175	188	208
Azospirillaceae	160	219	82	263	98	159	210	283	140	154	214	233
Alicyclobacillaceae	301	440	498	332	50	96	139	112	66	120	31	146
Thermomonosporaceae	734	583	341	332	7	28	1	3	95	63	153	53
Oxalobacteraceae	259	170	46	800	32	125	110	99	105	139	117	118
Acetobacteraceae	606	642	293	237	54	84	76	80	18	45	33	43
unc_Alphaproteobacteria	323	342	354	164	76	62	77	78	113	118	188	178
Comamonadaceae	281	203	122	293	108	173	172	120	63	174	114	151
Geminicoccaceae	62	59	27	43	130	236	268	207	178	197	183	187
Phyllobacteriaceae	134	172	65	81	191	107	143	120	199	201	216	189
Thermoactinomycetaceae1	276	683	237	246	1	15	5	3	348	60	60	56
Subdivision3_genera_incertae_sedis	238	216	290	155	44	67	75	48	76	171	139	231
Cystobacteraceae	159	277	86	244	89	135	140	92	79	95	133	121
Reyranellaceae	287	502	327	142	26	21	25	18	91	107	69	120
Kribbellaceae	180	225	111	208	0	0	0	0	204	193	307	223
Polyangiaceae	77	126	72	128	68	116	157	146	69	143	189	169
Saccharibacteria_genera_incertae_sedis	370	360	278	226	36	41	45	38	34	52	45	40
unc_Proteobacteria	110	198	140	119	80	114	101	119	97	120	134	102
Xanthomonadaceae	38	27	40	114	106	166	200	120	88	186	111	114
unc_Deltaproteobacteria	51	107	70	33	77	132	132	119	109	177	119	154
Clostridiaceae1	36	80	26	58	14	12	21	17	131	229	386	341
Vicinamibacteraceae	0	0	0	0	185	182	243	150	93	121	63	99
unc_Firmicutes	68	47	45	24	43	72	159	133	316	106	57	67
Latescibacteria_genera_incertae_sedis	6	4	26	29	111	121	168	170	96	135	68	139
Erysipelotrichaceae	159	336	74	87	0	1	0	0	142	165	138	106
Labilitrichaceae	100	148	204	213	37	34	57	54	56	58	74	51
Devosiaceae	145	106	35	41	113	76	72	67	69	62	125	52
Hymenobacteraceae	3	5	0	226	38	115	54	61	115	138	99	76
Isosphaeraceae	208	280	136	72	33	43	35	22	25	48	60	64
Rhodospirillaceae	192	155	86	69	13	19	31	44	80	102	96	88
Chthonomonadaceae	199	164	124	135	32	57	31	50	23	50	27	60
Rhodobacteraceae	17	3	0	4	218	135	122	118	42	10	46	10
Erythrobacteraceae	73	90	52	168	71	60	68	62	37	71	68	42
Caulobacteraceae	96	159	85	114	63	63	40	23	36	62	63	45
Gp11	0	0	0	0	47	33	70	52	147	152	100	88
Nitrososphaeraceae	84	85	52	115	3	6	4	8	40	98	119	117
Verrucomicrobiaceae	31	40	39	23	49	40	101	58	42	75	74	76
unc_Bacteroidetes	70	65	33	82	30	27	20	27	65	77	79	100
Jiangellaceae	0	0	0	0	83	81	93	75	71	47	46	56
Fulvivirgaceae	8	5	1	8	34	42	16	30	110	150	117	68
unc_Burkholderiales	21	37	25	45	37	65	68	57	56	43	71	43
Rhodanobacteraceae	83	88	40	58	75	31	25	17	10	33	46	29
Occallatibacter	263	217	115	19	0	0	0	0	0	0	0	0
BRC1_genera_incertae_sedis	79	123	38	74	17	31	27	32	28	36	24	36
Enterobacteriaceae	0	0	0	0	321	0	25	0	0	0	0	0
Lachnospiraceae	29	36	34	40	18	9	24	10	153	82	51	32
Heliobacteriaceae	43	20	41	27	34	17	25	48	50	75	56	32
Parviterribacteraceae	76	67	50	74	33	38	26	26	23	23	24	21
Kallotenuaceae	89	52	35	46	33	27	27	45	11	43	22	38
Ruminococcaceae	24	9	21	25	10	20	11	10	180	67	42	45
Longimicrobiaceae	4	2	16	30	29	93	61	80	23	28	32	19
Nannocystaceae	27	9	0	28	43	31	55	49	41	36	46	39
Acidibacter	1	32	37	64	22	0	0	15	50	54	102	61
Microbacteriaceae	35	46	10	58	27	18	35	20	18	94	59	13
Gp18	0	0	0	0	41	53	50	40	61	59	40	43
Nocardiaceae	49	62	37	41	25	31	23	15	31	38	52	21
unc_Chromatiales	0	1	1	10	25	43	57	43	74	50	51	29
Sphingobacteriaceae	71	17	4	21	49	48	25	30	22	26	40	29
unc_Bacillales	22	34	11	21	22	18	21	22	181	12	13	19
Arenimicrobiaceae	3	5	13	35	11	44	6	25	68	78	35	56
Bacillaceae 1	18	14	21	37	16	13	8	5	64	73	59	51
Baekduiaceae	57	111	25	15	4	48	42	42	12	10	12	13
unc_Clostridiales	32	14	32	15	11	14	12	28	126	38	21	26
Armatimonadetes_gp4	15	48	69	19	17	38	55	29	29	9	16	14
Armatimonadaceae	60	71	43	92	10	9	11	17	9	23	21	12
Opitutaceae	26	73	48	18	4	12	13	15	35	54	27	46
unc_Streptosporangiales	123	225	37	6	0	0	0	0	0	14	0	0
unc_Micrococcales	0	0	3	39	77	31	47	35	1	3	34	0
Kineosporiaceae	79	66	15	116	3	11	22	10	0	10	9	0
Coxiellaceae	45	41	155	24	8	1	1	5	9	6	19	23
Terrimicrobiaceae	0	2	2	1	2	0	33	30	47	83	40	75
Conexibacteraceae	41	44	19	35	54	30	12	18	0	14	9	13
Gp2	29	78	86	21	5	2	7	6	4	30	23	32
unc_Planctomycetales	30	95	29	12	28	31	8	6	17	15	10	11
unc_Clostridia	51	20	12	18	7	13	22	29	73	18	10	7
Aggregatilineaceae	35	23	24	36	5	10	13	21	34	37	24	22
Micropepsaceae	82	127	74	12	0	1	0	1	8	8	2	6
Bacillaceae2	22	16	20	17	4	17	13	14	56	40	49	12
Burkholderiaceae	12	1	5	6	17	29	31	25	38	24	44	29
Nitrosomonadaceae	22	29	0	33	22	2	28	23	1	20	39	45
Symbiobacteriaceae	7	28	6	1	2	18	36	30	103	1	9	13
Beijerinckiaceae	39	38	23	119	8	11	7	0	6	5	7	5
Rhizobiaceae	0	0	0	33	8	25	38	21	23	40	19	26
Chloroplast	45	24	3	22	9	22	12	11	18	41	22	14
Thermoactinomycetaceae 1	27	57	37	51	12	5	2	4	22	8	18	6
Pseudomonadaceae	0	0	0	0	7	6	64	109	2	6	8	0
unc_Propionibacteriales	0	0	0	0	0	0	0	0	43	65	70	58
Sandaracinaceae	4	10	1	14	21	24	21	29	29	22	24	12
Frankiaceae	66	91	47	33	0	0	0	0	0	0	0	13
unc_Thermoplasmata	0	0	0	0	23	53	21	21	10	24	17	20
Thermoactinomycetaceae2	32	100	17	33	4	1	0	12	29	0	6	2
Roseiflexaceae	0	0	0	0	21	51	57	43	0	1	5	1
Edaphobacter	100	112	18	11	0	0	0	0	0	3	0	1
Bdellovibrionaceae	39	22	21	39	2	14	10	9	15	14	12	16
unc_Xanthomonadales	9	15	24	31	20	13	26	30	12	8	0	4
Glycomycetaceae	6	0	0	7	14	11	14	7	37	33	51	13
unc_Chloroflexia	29	8	36	75	16	6	10	6	0	3	5	4
Gp22	0	0	0	0	11	16	28	16	29	27	25	31
Sporomusaceae	15	8	16	67	20	3	9	28	3	3	5	1
unc_Armatimonadetes	35	24	38	22	5	11	14	19	6	5	1	7
Myxococcaceae	40	8	0	41	0	4	6	19	9	15	11	19
unc_Chloroflexales	0	0	0	0	22	35	30	37	5	5	5	2
Gp15	26	21	31	3	10	6	6	13	12	10	13	17
Tissierellaceae	10	3	6	11	0	4	1	6	42	30	40	16
Anaeromyxobacteraceae	3	92	40	6	2	7	3	12	1	5	8	6
Xanthobacteraceae	17	3	9	20	4	12	15	11	0	32	22	16
[truncated: 165 more rows]

## Sheet: order
	Karasuk 1	Karasuk 2	Karasuk 3	Karasuk 4	Novosibirsk 1	Novosibirsk 2	Novosibirsk 3	Novosibirsk 4	Toguchin 1	Toguchin 2	Toguchin 3	Toguchin 4
[truncated: 181 more rows]

[truncated: 3 more sheets: classes, Phyla, diversity]
