# Supplementary figures and images for: Links between Soil Bacteriobiomes and Fungistasis toward Fungi Infecting the Colorado Potato Beetle
Source: MDPI journal article supplement (doi:10.3390/microorganisms11040943), 2023-04-04

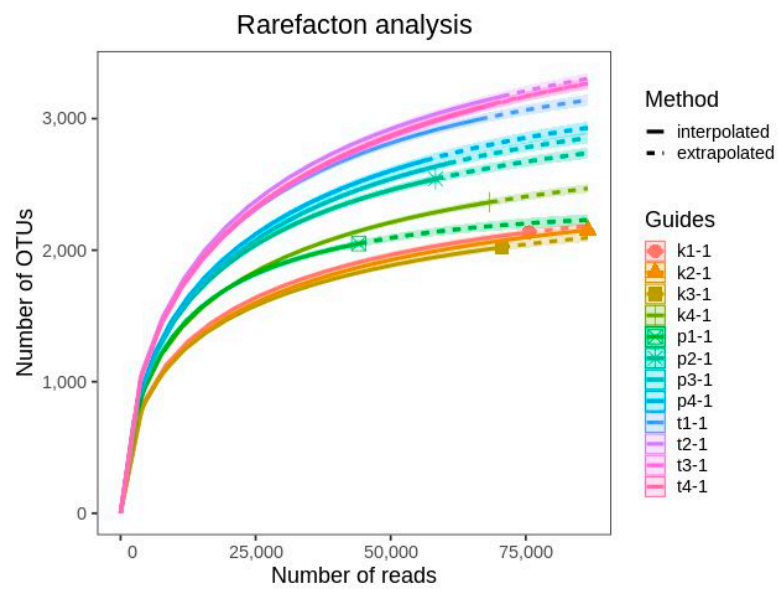

Figure S1. Rarefaction analysis of the investigated samples. k: Karasuk, p: Novosiborsk, t: Toguchin.

Supplement: s1 [file s1]
